# Supplementary material for: Transcriptome analysis of alternative splicing in peanut (Arachis hypogaea L.)
Source: BMC Plant Biol. 2018 Jul 4;18:139. doi: 10.1186/s12870-018-1339-9 (PMC6032549; doi:10.1186/s12870-018-1339-9)
Supplement: Supplementary file 5 — Table S5. Annotation of the new genes. (XLSX 1294 kb) [file 12870_2018_1339_MOESM5_ESM.xlsx]

## Sheet: new Gene.longest_transcript
>Peanut_newGene_5	Peanut_newGene_5.4
GCCCCACTTCCATTTTACAAGCACAGAAAAAGATTGCCTACAGGTATTGCATTCAAAGTATTGCAAAAAAGTGGGCAACATATAGGCAAAGATTGTGGAATAAGTTCTATGATCCAACCATGAGAAGAGAAGCATTGGTGAACAATGTTCCTGATGATATTCCAAGAGATCAATGGGCTTGCTTTGTCAATTATCGACTAAAACCGTCTACAGTTGAGCTTTGCATGAAAAATAAGGAAAATCGAAACAAGCAAATCATTCCTCACACTTGTGGATCTAAATCCAACTCTCGGAGGCGACATGAGATGCACTTGAAAACGGGAAAGAAGCCTAGTAGAGGAATGATGTACATTGAAACACATAAGATAAAGGATGGGTCTTTTGTAAATAACGAGGCAT…
>Peanut_newGene_27	Peanut_newGene_27.1
AGACAATACAAACCCTTCCTGCTCCTGTCTATATCTTCGTATTTATTTAAGATTTTTACAGCTATTCCTGCATATGTAATAAAAATAATTTTTTAATGACGTTTTAGTTTTAAAAGACAGCCTTTTATCGTCAGCTATAGCTATAAAAACCCATGCATAGCTATCTTCTTCTCCTTGACCTTCGACCAAAGATCTTCCAAAGCTTTGAGCCTATTGTTGCATGTGGACGAAAACGAGCTCCCAAATCCTTATTAGTGGCTTCAATCGGATTTTGCAGGTGCTGAGTTCACAAGGTTGTTGAAGCTGCGTCTCTGCTGCTTTGAGAAGGCTGCCCTTCGTCTTCCATAGTGGCCATTTGTGCTTTGCCTGGCTTGATGCTTCCTTGCTCCAAAGCGTAAG…
>Peanut_newGene_34	Peanut_newGene_34.1
TGAAACTTTAAAGGACAGGTCAGCCCGCATGAGTTTCTACAGGCAGTGATGAAAGCCAGTAAGAAACGGTTTCGCATAGGAGCTCAATCTGACCCAGTTGAGTTCATGTCATGGCTTTTTAATACGCTACATGCAGATCTTAAATCATCGAAGAAGAATACCAGCATAATTTACGGTTGCTTTCAGGGCAAACTTGAGGTTGTAAAAGAGATTCCTAACAAAGGGATCACCGATAAGAAAGAAAATTGTGAGGACCTAAACAAGAATGAGAAAATTTCAGATGGTGC
>Peanut_newGene_40	Peanut_newGene_40.1
GCTGAGTCTATAAGCAAAGAGGGGGTGCCCAGTACACTTGAAATGCGTCCCAAGGTCGCCAATGACCAGTACTGCAACTGAAAGCCAGGGTATCTTACCCTAAAAGGAAATGAATATTGTGTACGCTGGAGCTGAAACAAGAGCTTTCACGGGTGACCTATGACTTGTTCCCAGAAACCTGCCCTAGAAAATCTTTATTCGACCGATGCAACGAAGCAGGTCAAGGACCGAGGTAGTCTTTTCCAAGAGGGTTGGAATCGGTTCTCTAAGAGTGGGAGACCCCTTCTTGACTTACGGCTCTAAGGTAATCTCTCTTCACTCTTTCTTTCCCCGGAACCCATGCTCTAGGGGGTTTCCCTATTTCCCTTCTCTGGATAGGGGTCACATCTATCGGAAATT…
>Peanut_newGene_106	Peanut_newGene_106.4
ATTACCGTTTAGTAGTTTGCATGATATTACCGAGTATGTACCAAAATACCCCTTAAATCCTAGCGTTAGCAGGCGAAGCCAAAATAACCGACGCCCCAAAACACACCGCGCCGGTCCATTTCCTATTTCCCTGTTCCCAGCCGGTCATCCCCCTCTCAACCCTCAGGCTCAGCTGTCCCTCCCTTGGCTCCTTCGTCCCTCTGCTGCCCTCCACATTCCGAACCCTAACCGCCACCCGCCCCAACTCCACCGTCGATTGAGGAGCGACGACGATGATTTGGCTGTAGTGACGACCTCATCACTCTACGGAAGAGGTCATGGCTACCAAGAAGATAATTGCAATATGTCAGTATGGAGGTCAGTTTAAAACTGACAAAGATGGTTGTTTGTCATATAAAG…
>Peanut_newGene_115	Peanut_newGene_115.1
CGTTCACAAGATTCCCTTCGTTTAACATGGCGAGAGTTGTGAGGGACAAGCGATCAGGGAAGACCAAAGGGTACGGATTCGTGAGCTTTGCGGACCCTTCGGACCTCGCTGTGGCTCTGAAGGAGATGAACGGGAAGTACGTTGGGAACAGGCCAATCAAGCTATGCAAGAGCAAGTGGAAGGAGAGGACCGATTATGATGCTGTTGATAAGCAGAAGAAGCACTCCAAGAAGAAGTTGAAGTCTTCCTCCAAGGTTGGCGTGTTGCATTACTAATTAAGGTAGACGTCGAAAAGAAAAAGAAAAAGTGTTTGCATTGAAATCCTAATTTGAACTACTTGATGTAGCTATATATGTGAGTTGTTTTAGTTTATGAAGGTTTTGAAAATAACTCATATGT…
>Peanut_newGene_122	Peanut_newGene_122.2
TGTGAGAGTACTATACCAGATAAGAAATGTCCTCGGTGGAGGACTAATGAAAGCCAAATTTACCTTTTGAATTGGGGGTTTGGGATCGAGGGGAAAAATCCAAGTCAACTGTACGGTCTTGATGAAAATCTAAGAACAGGCAATATTTTTTTTATCACCAAGCCGGTTCGAAGGTTTGTTTTTTTTGTTTAATTGGATTTTTAAGGGAAAAAAAGATACAGAAACACCCAATACCCCCATTCCCATTCCCTTAATCCTAATCCCCAAAAGGTAACCCTAACCTCACCTCACGGCGACACCATAGTCGCAAGCTAACCTCACATCACCGCGACACAGCCAGCCGTGTCGTGTTGTTCGTGTCGACGAACACCGCGCGACTCCAACGACGTCACCTGCACC…
>Peanut_newGene_123	Peanut_newGene_123.1
GTTTTTTGCTCCCTATTTTTTTCTTCTCCAACATTCTCATTATCATTGTGCTTCCTCTTCTTTTTTTTCGACTTCTTCTTCTTCATCTCTATCGTCGGTTTTATCTTCATATGCACCGATGCCTTTGCCAATGTTAGGTGGCTCTATTCTATCTTTGCCACTGTTGGGCTCTTCTTCCACTGTGTCCATTGTTGATGCTATTACATTGAGTTAAATCGCCAGATCAAAACCCTTGTTGTAGCCGTAGGAATTGTTTTCTCTCTTGAGCTACACCTCTGGTGCCATTTTGCTACTGATCCTATCCGGTGATGTTTTGCCTCAACTGTTGTCCTTTTCCTCTATTTTACTTATCTCTAGGTTATGCAATTATGAGAATTTTATTGGAAGATTATATTTGAT…
>Peanut_newGene_124	Peanut_newGene_124.3
CCAATTTCATAAAACCTAGAATTTCGAAGCTGGCTTCTCTTCATTTTCCTCCAATTTCACGCGTTTGAATGTCGTTCTCACTCCCACTCTCGAAGCTGTGAAACTACCTCTTGCTCCTCCTCTTCGAACTCTCGCTCCGCTTCTTCTAACTCTCGTTTCGCCTCTTCGATCTCACGGTTCGCAAATCGAAACCACAATCCGATGTTCTCATTCTCACTCCAGCTCGCGTTGTCTCGCCTCTGGTTCATCCTCTCGCGCCATCGTCTTCTCGCTTGCACCGCCGTCTTTCCGCCGGTTTCATCGTCTGCTCGTCCCACGGCCTGTTCATTGCAGGCTGTGGGAGATTTTTTGAAGGAACTGCAGAACAGATGTATGAGTCACTCTGTGTAACACTAGGTT…
>Peanut_newGene_126	Peanut_newGene_126.1
TTACAACTTCCCTATATACCTGGAATCGTTCCGTTTTGACTCACCGAGTTACCTCTTCAAGCTCTCTTCTCACTTCTCTTTGCTTAAGTGATGTTGGTTCCAAGTTTGCATCATCCAAGGGAAACACCAGCACCTCGCTGGCGGCAACTCAGGACCCTGCTGTCCCTACTGTGCCATACATGAATGCCAGGGTGTTCCATTCACCTTATACATACTCCTTTCCGGTGGCGTCCGGTTGGAAGTTCCTCCGGCTGTACTTCTACTCGGCGTCCTACAATGGACTCAATGCCAGCGACGCGCTGTTCTCGGTGACTTTGCCGTCCTATACCTTGCTCAGGAACTTCAGTGTGGCACAAACCACACTGGCTCTGAATTATGTCTACATTGTGAAGGAGTACT…
>Peanut_newGene_127	Peanut_newGene_127.3
ATTGAATGGACCCATGAATGAACGTGGTTAGATAGTTGTTTTTGGTCCCCTTATTGTATAAAGTACTTAAGTATTTTTAATTGAAATAGAGAGCTTTTGATTGTCCATAATTTATCATGGGCTGCATTCAGGCCTAAAGGGTCATCATGGCTTTAAAATAATAGAAATTCTTTTCATTTTTATCACCTCCTGCGGTTACGTACTGGCCAAGAAAAGTGCTTCTAATGTAAGTCTCATGACCACTTTGGACTAAAATTCCATTTGTGGTGAAGTGTGTAATGTAACAGTTGTCTATGTTAGTTCTGAGTGAGTTAATTACTGAAATGCCCCCACCTCTGAAGTTTGAGTCTAATAAGAGGTCCTTGAAGCTTATGTACTCAAAATTGTAGGGAGGAGAAC…
>Peanut_newGene_137	Peanut_newGene_137.1
AAAAAGAAAAACCCTTCTTCTCAAATCCCTCACTAATTTTTTCATTTTTCTCAATCCAACAACCACAATGGCGTCACTTCACACCACCACTACAGCCTCATTCCCTTCCATCCAAACCCCAAGATCCCTCCTCACCCACCCAAAACCCATCCTCAACCTCTCCCTCTCCACTACTACCTTCCCCTCCCTCTCCCTCAAACTCACCCGCCCCCGCCGCTCCGCCGGAGCCCTCGGCGCCCGCATGGTCTCCACCGCTGCCGCAAGCTACGCCCTCGCCCTCGCCGACGTCGCCAAATCCAACAACACCCTTGACGCCACCACAACCGACATCGAGAAAATCGATGAAATCTTCTCCGATCCACAGGTGTTCAAATTCTTCGCCAACCCAACCGTAGATGC…
>Peanut_newGene_144	Peanut_newGene_144.1
CGTTAGATCACAAGCAAAACATGAATACAAGGAAATAAAAAGAGATGGCTGATGATAAAGAAGTTGGGGAAGATGAAAAAAAGAGCAAAGTACTACTACCCCAAAAATGTGAGACTGAAGCATAAAGGGTTCTTTTTTGGAATTCGGAATGGACTATTTAGGTTACATGGGGATGATTTGAAAAAAGGCTGCAATACAGATATAAAGAAGAGGTTGTAGTTCTTTCTAGAATGAAAAGGTCACACTTGATCTTCTTAATTGTGTTAACTTTGATGGGTTTCTGGCCAAGCTTGAAAAATATTGGTACATTAACTCTCAATGCTCTGTGTAACGACCCAATTTCTGGTACGTCATGATCATACTAGAAACTGAGCGCTACCAACTTGTCTACCTAATTAT…
>Peanut_newGene_148	Peanut_newGene_148.1
GTGTTTTTACCTTAGATGACAGTTAATACAATTGATTCTGGGACCAAAGCTTTTGATTTTTGGCCTTGCGTGAGAATGATGATAGCACCACAAATACACCATCTATTTCTCCTAACAATCATCAGGTGGTCGCACCAAAGACAAAGGTTACTGCCAGGAATCATAAACCAAGAAGCATTCACTTTCTCTTTATTTAATAGCAAATCAGGTTCATTTTTTCCAGGGCAGAAATATTGGTAGCCATAATCCGTAAGGGAGCAATAAGGACTGCTAGATATCTAACGTCTTCAAGGGATATCAAAGTGGGACAAAATCTCAATTATCTTGGAGAGTATAAAAATCCTTCATCATTAGCTTTGTGTCCAGCAACTAAGAACTGCATATCAACATATAAGAATA…
>Peanut_newGene_156	Peanut_newGene_156.1
ATCCGATCATCATCATCAACAACAACAGGAACAAGAGATTCCTATTATTGGAACGGACGATGACAACAACAATCACAACAGTAATACCACTGCTCCTACTGTTAGGGTTTGCTCTGATTGTCACACCACTAAGACTCCTCTCTGGAGAAGTGGACCAAGAGGCCCCAAGTCACTTTGCAATGCGTGCGGTATACGACAAAGAAAGGCGAGGCGTGCCGCCATGGCTGCTGCGGCGGCAAATGGAACCACACTGGCGGCGGCTGAGGTAAACAAGTTTGGTAGAAGCAAAGAGAAGCAGCTCAAGTCCAAAACTGGCAGTAGCGAGTTGATGAAAAAGAAGCGCAATAAGCTTGGAGCTGCTGGGAGAGGGAAGCAATCTCATCATCGTCATCATCATCA…
>Peanut_newGene_158	Peanut_newGene_158.1
CGTGACCGTAATCGAGACCGGGAAAGGGAACGAAGGCGAGACAAGGATGACCGTGACCGTGACCGTGAACGTGACCGAGAACGGGATCGAGTTCGGAGCAAGAGATCCCGTTCGCGGTCACCTGACCGTGCTGCCCGCTCCCGCCACACTCGCTCTCGCACTCGCTCCCCTGATCGGTACCGCTCTCCGTCCCGTTCCCGCTCTCCAGCGGACCGCTCTCACCGGCGGCGTCGCCACCACCGGACCCCTTCCCCGGACCCTCCAAGAAAGCGGCACCGGAGAGAATCCCCCGAGGACGCGAAGAAGGCGGTTTCTGACTTCGTGGACGGGATCGTGAAAGAGCAGCAGCAGAAGCAGAAGGAGAATGGTGCTGGAGTTGAAGGAGAAGCAGCTGAGACC…
>Peanut_newGene_162	Peanut_newGene_162.1
TGTTAGATTGTTACAGGTTGAAAAATGTAATGGGCCATTTGGATGGTTCCTAAGGGTTTCCTCGGCTTTCCATATGTTAGTTCCTTTCCATATATCTGCTTTCAGTTGATGACTTGCTATGGTGTCTAGTTTATCCATTAGTGGTATGTTTAAAATTGTGTTTATAGGAATTGGAAATGTGGAACATTAATCAATATAAATGTATTGTTTGATATAAACAAGAGTATAACTGGAACTAGAAATTAGTGTTTTACAAAGAGTATAACAGTCACCTATTGACTAGATAATAGATATGTTCTACTTAATAATGAAGTTGTTGGTTCTGCACTGATTTACAATTTTTTTTAATTCTGGTTTTTGCTAATGTAGGTGATGAAGCCGATGATGCAGACTGGAACT…
>Peanut_newGene_167	Peanut_newGene_167.1
AAAAAAGAATGGTGTACTCTTCATATCACTACACACCCAAGTACTACTCTACACTCCAAGACTCCATCACCACACTCTGTAAATCCATTCTTCCTTTCAGCTTCAAGAAACGCTCTCTCCCGCCAGCCGAACACAACCTCTCCAAGCTCCAATCTGATAACCTCAAATGGCAGCAGAACTCCTTCCATCAGGTTCTCAACCTCATGGCCCTTCACTCCGAAGGAATTCTCGCTCAATCTGAGGTCACTGCTTTCAGAACTAACTTGCTTGACACCCTCATTGCTTCTCCCCCTCAACAAGAACACCCACTTATCTTGAGAGACAAGTTGCTCTTTCTACAGGAGCTGCTTTATGCCAAATGCATTTCTGAAGAAGAATACCATTCTTCAAAGAGGCCTT…
>Peanut_newGene_169	Peanut_newGene_169.1
CCTACCCCTACATTGTTCTCTTTCTCTCTCTTATCTTGCTTTCTTAGGGTTCTGATTATCTTGTGAATCTCGTGCGGGGGGTATGGTTGAGTGTGGGAATATGCATGATAATATGATATGGCCCTCTTTGTATTCTTCCACAGCTTTCTTGAACTGCATCTAATTGTTGCATGCATGCCATGGCACTCTTCTTCTTGCGTTGCGGTTCAATAAAGCTGTGGGAAGATACAGATAGGGTCAAACGCCTAAATTACCTTCCACTCTCTGGATTCTACTCTCACCGCCGCTTTCCATTTTTATAACATAATTTACTTCTTTTCTTTTTTCGCAATTTTAATTTCACATATATCTGATCCGAAAATTTTGAGATGCAGCTATCAGAAGAGAACGAATGATGAT…
>Peanut_newGene_171	Peanut_newGene_171.2
AGAGCTCCGAGCACTCAAAGTGGTCCTTGGGCATATTTTTGGTGATGAGTCATCACCGGAGCGCTGACGTGGCGTCGTTTTGCCAGGCTGGAGCTGAGCTGGCTCATTTTCAATTTATACCCACATTGGTCCCTCATAGTTGGTGTTATTGTACAAAGCCCTACTCATGCACCCTTGGCTCTCCCTCTTCCTCGCGTTCTTTATCGCATTCTTCAGGCTCCCAATTCTCTTCCTCTACACTCTCCAAACCTACATCCACCCCAATGCCCAACCCTCCACATCCAACGGCCTTCGTGCTGCCATTCGCCGTCCTAGCGCCCCAAGAATAAAGACAAGCTCGATTTCGCCCCATGTTGAATGACTTAGACAATCATTGACAGCTATTGAAGAGCTACATCT…
>Peanut_newGene_173	Peanut_newGene_173.1
AATGAGCCTTCTAAAGAACTGCCGAAGTTTTCTGTCAAACTTTTTCTTCATTCCAGTGGCCATGTTGCAGCGAAATTCCAATATGACCAGGTTTCACATGCTAACTTCATCAAGAGTATTGAACTTTATATTTCTATTGAAAATTTTGAATTTTCCATAATTAGGGGCTATGTCTTTGACCTTGAACAAGTTCCTGCATACTCATGCTTTATAGGCTATGTTTCATGGCAGGTAATAATTTCTGCTTTTCGGGATTGGCTGTTTTGAGGGCTTAGTTATTTGAAAATTTGAGTCTGGGTTATGGATGTTCTCGAGCTTGGCTTATATAATTTCTTTGGGGGAAGCTGGTCAAGTGTTTGGGATTCCATCCATATAGTAGCTGTTATAGCAAAGTAAATA…
>Peanut_newGene_174	Peanut_newGene_174.5
GTGTTGTTTGATTTAATTTTTTACTATTTGCCACCTGTTTCTGCTATAGCCCTCTCGTGCTATTAGGTTAGGGTTTAGAGAGATGAGGACCCATTTCTGGGAGAGATTTGTGGGAGTGACTGAAAGATATTTAGCTTTACAACTTCGATTTCTCTCTTCCTTCGATTCTCCGATTTGATGATGTCGGCGTTGAAGATCTTCGAAATTATAGGATTTCTCATGTATCCTAGAAATTATAGGCATTAGATTGAATTTGGGTTTCTAATATGTAATTCATAACAGTTTTGAATAATTTTAATTATTTTTTTGAACTCCGTCTTCATGAAGAGAGATTATTTTTCGATTTTCTGTTAGATGAAAAGGAGAAAGCAAGAGGATAAAGTGAAGAGGGTGCAACAG…
>Peanut_newGene_183	Peanut_newGene_183.1
AATCAAGCAGTGCCTACAGTTTCATTCTTTTCTTGATTCTTTAGCAACATAATTTAGAAAAGTTTAATGGTGGGAACTCCCAAATTAACAACCTTATTGAAAAAGTGTTCAACTCTGAAACAAGCAAAAGAGATCCATGCTCACATACTGATCAATGGACTTTTCCATCTTGAACAACTCCTCATCCATCACATTCTTCTCTGGAATGTAACCAACTACAAAACTCTGGCACGCTATGTCCACGTTGTTCTTCACCGTATGCGCAACCCTGATTCCTTCTCATGGGGATGTATGATTCGCTTCTTCTCCCAAAACGGTCCATTCATGGAAGCAATTTCTCTCTATGTTCAAATGCAGAGGATTGGCTTGTGTCCAACTTCACATGCTATGTCCTCTGCG…
>Peanut_newGene_187	Peanut_newGene_187.1
CTGCATGTTGCCGGTGGTGATCTACTCGGCCATGTCGCTATTCCTGCCTCAGGGAGGGATCGTGGCGATTGTTGCCGCTTCGATTTTCGTGCTGTGGGCGACCAGGGCTTCGACGGGTCTCATCGTTTTGCTTGCGGATGGCGGCGAGGAACACCGTGGCTTGATAGCGTATGCGTGTTTCTTGATCTACACTCTATTTTCGTTGCTTGTTGTGTTCTAGGGGTGGATGTGGATTTGTTTGGTTGTTTTTCAGATTTAGAGAACGGTTCTTTTTTTGTGGGGTTAGCATTGCATATTCACGCTATCGTATAGTTATAATTTGATGTAGAAAAGTGGAGATTATTGACCTTTATTGAAAAAGATTTTGTTTAAAATGTTATCTCTAGGATACTTGTGTTT…
>Peanut_newGene_193	Peanut_newGene_193.1
CAATGTTCTTCGAATGGAAGCATCAGCGAAGAAGGGACTTCGTCTTCCAAGAGGGGTGAAGAGAATACTTTGTCTGGGAGATACTTTTGTGGACAGGGTGTGGTGTTGCTACAATCTGGAACCTTAACAAATCCTGAGAGATAGTTCGTAAGGTGTCCTCTATGGAAGACGATGGATTGCAAGTATTTTGTATGGGTGGATGAGATTGACGGAGGATGGGAAGGACTGGCAAGAGCCCTTGTTAGAAAAAATCAAGATAGCTCTTGTAGTAGCCATGAGGTCAATCTCACTGGGCAAAGAAGAGAGATTCAAGAGAATAGTGTGAAGATCTTGTTAAAGATAGGGAAGCTCCATGGTGAAATTAGAACTATTAGGTCATGGATTATAACTATTTTTTTG…
>Peanut_newGene_204	Peanut_newGene_204.2
AAGAAGGAGAAAACGATGCAGATTGCAGTGAGCCAAAGGATGTCTCCATTGGAGCCGCTGGGAGGAGGCCCACTCTGTAGCGCCTGAACAACTGTGAGAGGCCCCGCCGGACTACACTGCTCTAGTTGTGATGAAGCCACAAGGATGTGGCCAACATTGTCACGTTGGAGTCGCCTGGGGAAGGCCATCGCTGGACTCCATTGCAGCAATCTAGTTTGCTGTTATCTGAGGACACTATGCTTTAAGAACCATACCCATTACACTGCATTGATCTGGTCTGACACCGTGTATGAACTCCGATGCGATAAGGACTACATCCACTACTCTGCACGAATTGGCCTTTGTAAGTGCCCTCTTACTTTTTTGAAACCTACTATTCTTGATGCCTAGCTTTTTCTC…
>Peanut_newGene_207	Peanut_newGene_207.1
GGGTATTTGTGAAAGCTAAATGAGGTAATGAAGAGGTGCTATTGATTACTATTTAAACTATGGGTCTTATATTCTCTCTAATTTTGTAGCCTGTGCCACACTACTCTCATCTGATCTCATCTGCCATTCATATTTAACCATCTATCTGCATCTGTCTTTCTTATTAAATGACACATGCAGAGGAGAAATTAATTATACATATTTAATTATTTGATGTGATGAAACTCATCTCATCTCATCATCTTAATAATATGCTCTTTTTTGAAAGCTTAATTTCACTTTCATTGACAGCTTCTATAGCTGTCTTCTGCTCCTTTGAGAGAACAAAAATAATGGATCCATCAGAAGAATGTCACAGCAGTGAATCAGGATGGACTATGTATATTGGGTCCCCCATAC…
>Peanut_newGene_209	Peanut_newGene_209.1
AGAAGGAAAAATAGAATCCTAAGGAGATTATAAGGTATCATGAATACTATGAGTGTGAGCCATAATTCTCATTTGAAAAATCTTCAGCGTATTCTTTGGAAAGAGTATGAAGAGCTCCTTTCTCAAGAAGAGATGTTATGATTTCAAAAATCTAGATGTAAATGGATTGAGTTTGGCGACAGAAACACAAAATACTTTCATGGCACTACTATGGCCAGAAGGAGAAGAAACAAGATTGTTGCCTTGCAAGATGAAGCGGGTAGTTGGATACATGATAATCCTAATCTTGAAGCAATGGCTACCGATTTCTACAACAAGCTTTATTGTGATGACCTCCCTAATATTCCCTTTGTTCTAAATGGTGCTTTTCCGGTATTTAGCAATGACGATAGGATGATG…
>Peanut_newGene_210	Peanut_newGene_210.1
ACTAAGGATGAAGCTCGTTCAAGCCAGAAAAAGAAGGACCCCGAGTTAACGGCTATGGAAGCGGTGGTTTTTGATAATATGAGGCGTATGCAAAAAGATCAACAAGAGGCTTTCGAAGTTTCAAGAAAAGCTAGTGGTATCTTAGAAAGCTTTGTCTTGAAGGACAACTTTCTCATCCAAATGGGTATCAAACCTCTTCCTCAAACACGGGAAATCAGGATGGCTGTTCGGGAAACACCCCGGGGAAACCACTGGAAGCAGGTACGAACATGGTGGTGGATGATTGCACCAATGAAGGAGGGAATCCCAAGTTAACACCCGATTTGGGTGGCAAGGCTCAAGCCCAAGCATGATTTGGGTTTTTGATTACCCCCTTTCCCTTTTTGGTTTTTTAATGAT…
>Peanut_newGene_220	Peanut_newGene_220.1
GCCCAATTCATGCTCCTCTTCAGCTCTTCTTCTCCCTTGTCCCTCATACCAGCGCCTCTCTCCTCTGTCTTTCTGAGCCGGCGACTCCTTCCCTCCACCGACGCCTTGCTATCTCCTGTCGCCACCTCCCGTCGCGCCGTCTTGACCGTTGCTTCGCTGTGTCGTTCCGCGGTCTGGACCTCAAAAACAACAAGTGGTTAGATCACCATCTCCGGTTTCTCCATTACTACAACCCTTCCCTTGCAAATTGCAGAGTCTTAACTACCTGGTGTGGCCATGGATGGCGCAAACAATGGTGAACCACAAAATCAGAAGCGTGATGAACTTACAGAGTCACTCAATGATCTCTTTAGCAGCATTAGCACAATGATCAAATCGGAG
>Peanut_newGene_221	Peanut_newGene_221.1
GCACTTTTTCATAATATTTGGTACAGTGATGCTACATGGACAAACTTTTTTGTGAACCAAGTCCAACCAAGTTATTGCAACCCCAACAAAAACCATTCTTAGCACTAAGGGTGTGTAAAACATGCTCCCACTCACCCAAACCTTTGGTAGACAGCATAAATCATAATCACTCATAAATCATAATCACTACTTCCTCTTATATTCTCACTCTCAGAAACTAAACAAGCATCAACAAAGACACAGAACCGCAAACCAAATGAGCATCAACGAAGTCGGAATACACCGCAATCAGAAAGGAAAATCTTTGCAACCATTCTTCAGGTCCTGAATGTTGGCGCTCAAGACAAATATCTGGGTTTACCAACAACAATCCAGAAATAAAAAAAAAAAGCAACATTG…
>Peanut_newGene_231	Peanut_newGene_231.2
GCCACTTATAACTTTGAGCTTCCACTACTACCTCTTATATATTATGTATCTTTCTAGCTACCTCTCATAAGAGGAATTCTAATTCATTCATTTAGGTTTACAATAATCAGTCCTCATTTTTCTCTCTCACCCATTTTTTCCTCCTTTCTCCTTAGCAAGTATAGTACAAAGCTCCATGTCTGTCTCAACTATTCCAGCACCAAAATTAGGGGAGAGATTGTGTGAAAATGGATTTGAACATCCCAAAATTCTTCCTGCCATTGATGATGCCCATGGAGGAGTTATTGTTGACTTGAATGAGCCTATGGACCCACAACATTTTGCTACATTGCTTAGGTCTTCACTTCTACATTGGAACCTTAAGGGAAAACATGGTGTTTGGATAAAGTTACCTATCAA…
>Peanut_newGene_234	Peanut_newGene_234.1
ACCAAAATGGGTAATCGCATGAATCTCAGGGACCAAAATGCCAACATTGCACTGTTCTGTCTCATCCCGTGTGACCAAGCTCTTGTTTGGTTTCAGGTTATGAGTTGATAATCTTTTGTGTTGCTGCTAAACTTGAGGGAGATCCTTGCTTCAGCTTTACATCCAACTTATGCTCCCTTTCTGCTGATAGGACCCTGAAAGTGTAGCATAAAAAGTTGCAGCGAAATTTGTTTTGCTCTGACACTATGCCGAAATTACCTTTGCAGAGTAGTAGAGCTTATGTTGCAGAAATGAGTGAGAAACTAGCAGTTTGCTAAATGATATTGCCAAGAAGTTTGCAGTTATTGGATGGAGTCCTGGAGCTTAGAAGTTCTGCATCAGTACCACTTCACTTGCAGT…
>Peanut_newGene_239	Peanut_newGene_239.1
CATATCTACCCATGTGGTCTCATGGCGAGGAACTCCTTCCCAATCAACTAGGAGTTCAGTTCGAGGTCCTGTCGGAGTGGAGACAACACGACTTGCTATGATGACGGCTGGGCGTGGCTGCAGAAAAGACGGTAATTCAGCTGCAGATGGCACTAACAATGGTGGAGGACCGTGGAAGGGTTTCAGCACTGACACATGGAAGACCGGATGAAGGGCACACGACTCCGGTAACTCCAACCAGAATTCCTCCATGGAATGCAAGTGATCATTAGTGTCAGAGACCTTACTGTTAATCTCAATCTGACCCCGCTGTAAGGCTGTAATTTCTGCTTGGGATCGTCGGAGTTCATCGGTATCCACCATCTCTCAATGAGAGCACCAATGATAGATTAGAAAATG…
>Peanut_newGene_240	Peanut_newGene_240.1
ATTAAATCCTTTCACATCCTCAGCTAAGGTGGACCGTATGTAATCAGGCGGGAGATCTAGGAATTGAAAACTTTGCCGTTCATCAAGACTTTGCTTAGCTAAGATATCAGCACATCGATTTGATTTTCTATAAGCATGCTGAATCTTTATTTTCCATGGTCTTTCTATCAATTCTTTAATTTCTCTAATTATTGTATTATGTTCTCTGCAGGATCTTCCTTCATTCACCAGCTCTGAAACACTTTCTTCTCGGTTAGTCTCGACAATAACTCGTCTCGTACCCATTTGCCAAGCCATGGTAAGACCATGAAAATTTTTCCATCGTTCAGCTTAATCTGCACTGCAAGTTCCGACATTGGCCAGGAAGCCTCTTATCTATTCTCCAAGGTAGGATTCAAG…
>Peanut_newGene_242	Peanut_newGene_242.2
ATTTGGCAGAAGAAACTTAAAAAAAAAAACAAATATGACTTTTTTACATCAAAATAAATTCTGCAAAAACATAACAAAAAAGTATAAATATGATAGCAAATTATTGCTTATGTGATAGATGAGTATGAGCTTGCAAAGTACACCCTTCCATGCATTCTCCAACCTATTTACTTTTAATGTGTGAATAATATAATTGATGTTTTTTTGGAGTCTAATAATATAACGATGAAAACTCAGGTGTAGTCAAATTCACGTAAAGTTGATAATTGAGAATCGTTAAATGATTTGATTGATTTGACTAAATTTTTATCTAACAGTTTTCAATTATCAACTTCACTGAAAGTAACTACACCTGAATTTCTATCAAATATATATAATTGATATGATCACATATAGGTT…
>Peanut_newGene_243	Peanut_newGene_243.1
GATCCATCTGCTGACCAAACTCAACGTCGGACCCGTGAAAACCGCAAATTTTGGACTGTTGATGTAAAAGGTAATTTGTGGGTATGTCTTGTGTTCTTTCCTAATTTGATTTTCTGACAAATATAACTCACAGATGCTTCTGGAGTTACAAAAGTAGCATATTTGAAATTGAAGGATCTTTGGAACCTTCCCAGTGGCACCAAAGTGGTGTTGCCACTTAATGATTGGAAACAACCAGTTGGTGAGGCAGCTGGCCTCTTAGGACAAGCTCTTGGACAATTGGGTGCCAATTTTGCTGCTCTTCCTATTTGCTATAAGTCTTGGCCTAAAGTTCCTAAAAATCTTAAGGAGGAGATTTTTGATAGCAAGATAAAGGATAAGTTCATTATAAATGATGAT…
>Peanut_newGene_246	Peanut_newGene_246.2
TGAAGCTCCACCATCTATTCAAGCCCCGACACCATCAACTGATGCTTCACCATCTATTCAAGCCCCACCACCATCAACTAATATTATGCAACCTATTCGATCCCCACTTGATGCTCCATCATCTTCTCAAGTTCCACCACCATCATTTGATGCATCACCACTTACTCCTGCCTCATCAGCATCGGTTGATGCCACATCATCCCCGGAAAGTCCAGCACATGCTCCCCTAGCCACCCGAATTCAGCCTCGGCGCCGTGAAAGCAATAGACGCTGGACAGTTGATGTAAGAGGAAAAGTTCATTATAAATAGCAACATAGCAAAGAAGATAATCATAAGCAGGATTGGGGACAAGTGGAGGGCCAATCGAACTAAAGTTTTTCGTAGGTATTATGATCCAA…
>Peanut_newGene_247	Peanut_newGene_247.1
GGTAACGTTAGCGGAACCCTAAAAAGCGTAGGTAAGTGAAAGCTTCGCAAATCTCACTTTTTTCGCAGAGCTCGCAACGCTTTCACCAGCTATCTGCTCGTCGAGTTTCCGTCACATTTGCAGCATGCCTCGAGTTGCACGCTTTGGTCGTCCAAGAAAAAGAGGTGGAAATAAATCTTCTATGCAAGAACCTTCACCGTTGATTGATTCTCCACCATCTACTCAAGACCCACCACCAACTATCGATGCCTCATCTTCCTCTTTGCCTCCATCTACATGGCTTGATGCCACATCATCTGCAGAGGCTCTTCTACAAGCCCCACCGGCCACCCATTCATGGCTCCGGCTCCGCCAATACTTAGACGCTTTTTCTGAAGTCCCACCATCATCGTTCAGAGC…
>Peanut_newGene_254	Peanut_newGene_254.1
CGCACCTCCAGTAGCCTCCGACATCGCACTTCAGGCGACAGTCACAATCGTGCTTTGCGTTCACTGGTGGTAGCTCTTAGTCGGTCAAACTGCTCAACGTCGAGAACTTCTCCAGGCATTTAGAATACTATGACGCGTAAACATAATATCTCCGGACAGTCAATCCTCGAAGAGTTACGAAGACAAAGTGAAGACATAAACTTGAGTTCGGAAGATGGGTTGGAACAAATTAGGCTCAATGATGATGGGGATGAAATTTCAGAGACGGAGATGTTAAATCAAAGTGGTGGTGATCTACCGGAACGTGCTGCACCTAAGAATAAAAGAGATGAAAATGAGCCACTGCTTGTGAAAGTTAAAGACATCTCTAGTGGAGAAATTATCACTCGCAAGATGACA…
>Peanut_newGene_257	Peanut_newGene_257.3
AGATCCTTCAAGCAAATCCATGCACAATTATTGATCTCTGCCCTTGTTTTCAGTGACTTATCTCCAAAGTTTCAAACTTTATCAGTAATCATGTCACTGAGGTTCATTACCGCTGCAATTACTTGAAGCAATTTGATTGGAGCTTGAAGCAAATTGAAACAAGTACAGTGCTTGCAAGGTGTTTGATGAAATGCCTATGAGAGATGTGGTGTCTTAGACAGTTAGACTGGTTTGATATCTGGGAATGTGAAGGCTGGGTTGTTTGAAGAAGCCCTTGCATTGTTTTTGAGAATGAATGTTGAGCTTAATGTGGCAACTATTGTTAGCATGCTCGGGGCTTGTGCGAAACTGGGTCGGTTAGAGTTAGGCAATGCTGTGATGGATATGTGTATGAAGGGT…
>Peanut_newGene_265	Peanut_newGene_265.1
GTTCGGGGTCGATAATCAGGAAAATATGTTAACCCTTGAAAACCAACAACATATATTAACAGTTTTGAGGGAGGATTGGAAAAGACGACAGAAATTATGCACCATTACACTGATATGTTACATCGTGCACATGTTATATTTATTGAGATTTATGTCTACGCGGGTTGACAAATCCATCTCCCATACATTGGTTGGGCGAGAACAAATTCGAGCTACTTTAATGCAACAGTTAAGAGAAACTCATAGGTGTCGTGACATCCTACGCATGGGCCCTGATGCATTTCTTCAATTGTGTGAGAAATTAAGAGCAACACGTCAAGTGAGGGATACAAAACATGTTACAGTAGAGGAGCAAGTTGCTAGGTTCTTGTATATAATAGCTCATAATGTGAAAACTAG…
>Peanut_newGene_269	Peanut_newGene_269.1
ATAGAAGCAAGCAATAACAATAACGAACTAGCAGCACACCAGCTTGCAGGAATTGTACGGTGAAGAATATGGGGTGGCCGTGGCTCTTTCATCTTTTCCTTCTTTCTTTGATTTGTCTTTCTGTTTCTAGTGAAGAATCCATTGAGCTACTAAACCTATGTGAAACAAGAGAAGATGTTTTACAAGCATCATCTCAAGATTCAGACCTATCCTTAGCTATTTCCATAAGTTATGGAGACATCAATGGCGTCTCAAGCAACATCTTAATGGCAGAAACTTGGCTCAAAACCAACGTTCTTGCACACTACCCTGCCGTGAGGATCACCACCATAGTCATAAACTTGGATCTTTGTAACCACGGTGTCAAAAACAACAACTACAATCATGAGAGAAAGTTGA…
>Peanut_newGene_279	Peanut_newGene_279.1
GGAACTTTTGTTGTGCTTGCAAAAATTATTGAGATAGTTGAGGATGATCTTTGGTGGTACTCTACTTATGTGTGTGGCAGAGCTGTTCAGACAAAATCTGAGATTTATTTTTGTCAATTTTGTAACATCAATGTTATGAATGTTACACGTTAAGAGTGAAGATGTTGGCTGAAGATTTCACTGATGTGTTTATTTTTGTGCTCTTTGATTGTGAAAAAAGGTTATCTATTGAATAGGCCTTGCGCTCAACTATTTGAGCAACATCTTAAGGATGTGGATGTAAGAAAAAGATCATTTGACCCCTTTAAAGTTACCAAAACACCGGATGTGGTGTTGACTCTTTCTAGCTATTCCAAGCTTTTTGTTGTTTCACCTCAGTGTACTTAGAAGTAATCCAGT…
>Peanut_newGene_286	Peanut_newGene_286.2
CCAAATCCGAAATTTTTGGGGAGACTGAAATTTAAATAACAATTTCAGCCTAAAATACCCTTAGTCCAAATTGTTAATTCCAAGTTTACCCATTTTGCAAAATCAAATTAGGGCACATATATCATCTTCTCAGACCAGAAGCTTCCAAGCATCAAAGATTCCTAGGTCAAGCTTTTGCCACATTGCCGCTGTCAGGACCACCTCCTCCTTCACGTCACCATCGCAGCCACCGTAGTAAGGTGAGTCGTTGTCACAATTTTAGAACTCAAGTTCGTAGCCAGTGTTGTCATCTCATCTTCGACGCAGGACGAGCATCAACTGCCTCCACTTGGAGCCTCTGTCTTGTCGTCGCCGTGAGGAACACGACATAAATTTCGCCGTCGTAGCCACCGTGAGCTG…
>Peanut_newGene_287	Peanut_newGene_287.5
GCAAATTCTACTAGCTTGTCAGGAAGCTAATTTAAAAAAATAAAATAAAATCTTGAAAAAAATTTGTTTACAGATGCAGAATTTGATAGAAAGGTACCTACAATTATATGTGAATAAAGATGAAGTAGTGATAATGTTTTGATAATCAACTTTCTATATTAATTACATGATTTATTCACTATTAGATCTCGAAACTAATTTATTTTGCTCTTAAAAAGAGTCCATTTTGATTGTGTTGCTTGTTAGGTTAATCTCCTATTTCAGAGCTTGGAGAAATTATCATTTGATATGAGAGGCGTCAAGTTGACTTGGGAACTAAAGTCTCGAAAACTTGAATTTAAAGAGTCAAAGGAAAGGGTTGAAGAGAAAATGAAGATACTTCCTGTCAATGATTTGGAT…
>Peanut_newGene_297	Peanut_newGene_297.3
AAAATTTTCCATACCTTGTAGATCTACTAACTCTTCGGTTTCTCTCAATTGAAATCATCTTCGTTCCCATCGAAGCCTCCCAAAACCCTCATCCTCTAAGGTCAGCTCCTATTCTTCTCTTCAATTCATTTCTTGTTTTCCACAGTAATATCTCTCTTCAATCCCATTTTTTCAACAATCTTAAGGTTTCCCGTTCTCTCGCCATAACCCTAATCTCTGCTGCAGCTGCACCCATAAACCAATGGTGGCAGGAATTTTTAAATATGTTCTAGTATTACCTAGATAAATCTACACCTCACACCACTTATAGGTGGATTGTGACTTTGGCAATTATGTCGATTTATGTCTTCAGGGTTTTTTATGTCCAGGGATTTTACTTTGTGTGTTATGGGCTTGGAA…
>Peanut_newGene_300	Peanut_newGene_300.1
TTAATTCATAAATAACTTCCTTGCAATTCCCCCAAATTAAAAAGTTTATATAACCCCAACTCTAAACTGCAGCTTCAAACCTCGTCACAATCGAAAACTCTCTCCAGTATCCACATACATTGTGTCATTGTGGTATATACATATATATGCTCTGTTGATGATTGCTCCACTTCCATCTCAGGATTCAAATTCAATCATTGTTTATTAAACTCGGACAATAGGAGCTTGTGGGGAGTTAGAGACATAGATACACAATGGGTTATGCCAACGGGCAAGCTAGTTATGTTAATGGAGAATCTACTTCAAATAGGAAACAACAACCTCTCTTTTCTTTTGGATTGATTACTGATGTCCAATATGCAGACATTCCAGATGGTCGATCGTTTCTTGGTGTTCCTC…
>Peanut_newGene_302	Peanut_newGene_302.1
CGCAAACTTCCCCAAATTCAAGCTAGGTATTCTTCAAACTAGGTATCTTTGGTTGACTTCACTTTCTCTTCACCACCGCCTCCGTCCGATACCACCACCGGCGACCACCATCGCCTACCCTCTCTCTCTTCCTTCTTCTCTTTCTTCCCCATTTCTCCATTTCTTCATTCCTGCGTGCGACACCCCTGTTCATGGAGTCACCCTCTGTCCGTGTCTTCAAGCACCGACAAGCAACCACCAGCGGCGGCGACCTTCTGTGCCACCGCGACATCACCACCACCCCGCCGCCTCTCCGTTCTTCTTCCTCCTTTCATTAATGCAGGTTCCCTTCCCCTGTTCCATGTCTTTCTTTTCTTTATTTTCACTGCTTTTTAATTCTGTTTTTATAAATTTTGGTTA…
>Peanut_newGene_303	Peanut_newGene_303.1
CTTCAATGAAGGGTAAATAGAAACCACGCACGAGCCCTCTGAAGATAGAAACCACTCGCAATCCTCCTCCCGCTGTGGAACGCTGTAAATCCTATCTCGCTCTTCCTCAGATTTCAATCATCTCTTGCTCCGCCTTCAGATTCAAATTTTCGATTTCACTCTCTACTTCAGTAAGCATTTTCTTTCTTCTTTAATTTTTTTCTATTCACGGAATTCTTCAATTTTTCAACTTTTGCTGATTTCGATCAAGATCTGAATTATCGCTGCTCGTTATTGTTGCCTCTACTTGCTATGTTAGCTATCGTCATCGTCACTGTCGATATGCAGGTAAACCATCTGTTGATCCTCAGTGTGCTAATTTAGGTTATGAATTCATGACAGATCCTCAAAGTGATGAGT…
>Peanut_newGene_307	Peanut_newGene_307.1
GAAAGGAAACAGGGGAGTTCGAGGGGGGGAAACAAAAAGGAAAAAGAAAGAAAGGGAACAGAGAAGGAGCAAAGGGAAAACGAGAAACTGAGGAAAGGAAGAAGAGGGATCAGGGAAGCCAGAGGAAAGGGCGACGACGGAGGGTGTAATTACGGCCGCTGCCGTTGAAATCGGAAGGGAAGCACCACAGAGAACAGAGAGACGCGAACGATTGAGGGAGAAGGTAGCGTCGCCACCGTGCCTCGTCATCGTCGCTGAAGCTTCGATCGCTATTGTCCCTGCTAGGTTGCCACTGACGTCGAACAGAACAGGGGAGAGGAGCACAAATTGGAAGAGGAAAGGGAGCTCTATTACGGGCACGTCGCCAGGAAAAGAAGAGGCGATGTTGGTGGGGATCGC…
>Peanut_newGene_309	Peanut_newGene_309.2
GCCTAGATGGGCGAGTGAAGCAGTGGTAGTAGTTAAGCGTGATTGAGAGAATGTAAGCACTGAGCAGAGATCAGAGCAGCTTTTTGAAGGAAACGAGAAAAAAAAAAAAAAGAATAGGAAGGCTTTATTGCGCTGATGAGCTTCATTGATAACTGCAGCCTTAGTTTACCGTTTTCAAGATCTATCTTCTATCTATTTCTCTAGCATCGAAAATTATTTGAATACCCTTTGCAAATCTAAGTGGCCATTTTTTTGTGTGTTAGATGGAATAATCAGCTACCTACTCTTTTATTTATCTACTTCTTCTTCTTTACCAAAGCTGTGTGTGTGTGTGTTTGTTAATAGTGGCCGTACATGGCAAGTGGCAATCAGAGAATGAAGAAGAAGATGGAAAATCCA…
>Peanut_newGene_318	Peanut_newGene_318.1
GGATGATGATGAAGGGCAGGAAGTAGGTTGGATTTTTGTTAAACCTTTCAACGCTATTCACCAATACACACAGAAAACAGCAATCATAATCATCATGGCCTCCTCAGCCTCTCTTCTTCTCTCTTCATCATTACCCCCTCACTACACTTTCCTTTATCACAAACATCATCACCACCACCACCCCCACAATCATCACCCTTTTCTCATCATCTCCCTCTTCATCCCTCCTCTTCACAACAACAACATCAACATGATCATCAAGCCAAAGAAGGAGGAGTACTTCTTGTTCCTACTCCTTTCCTTGGTTTTTTGAGAAAACCCTAGCTACTACTACATACTTTCCAGGATCTTGCTGTGCTCTTTATATAACAAGATCCAATTATTGTTAAGCATATCTAT…
>Peanut_newGene_321	Peanut_newGene_321.2
CGGCGCTCCTCTGCTTCTCAGTTCTACCACCATCAGTCAGCCACCGCCTCTGCTCAACTGCCCCTTCCCCTGTTCCCAAGCTCAGATTTTCTTTTTTACCAGCACTGTGTTCTTCTAATGTCTGTGCATTGCTATTGATGAATTCAAGGGCAGCGGAGAATGAAGTTAGAGATAGAAAGTTTCAAAGATGGTAAATGCAATGATGGAAAAGAAAAAGAGAAGGTTCACTTTCTGTGCTGATAAAGTGATTATGCTGGTCGGAAACTTGTGCAATTAAACAAGTCTACGTCGGTTTTTCTTTAGCTGATTACCGAGAAACCCAGCATGCAAGGGGTCAAGTTAAAACGTCACGTCGTTTAATCAGATTCCTTGGAATTGGATTATAGAAACAAACGCACC…
>Peanut_newGene_324	Peanut_newGene_324.1
TAAAAAACTCCTGAAGGAAATAAATACTTTGTGCTTTCATTTCATTTTCCTAACTTAATTACTAAATAACCAATAACAACAACAATAATAACAATAACTGCATATACTTGAGGCTTTCTGTTCTGTTTCCTCCTCCTTCATTCCCTTCCTTGGCTTTACATGCACTACCTTTCATTTTGAGAAGGGATCAGAGGGCTGGTGTGGAGTTAGGAATATAAGGTTTTGGAGCACCACTTGTGCCCTCTTACATTATAGGATCAAGGCCAAAATCAGGAGCCTTATTGGTGCCTTTGATGCTGATTGAGCCATAGAAAAGAGGATTAAGGGAAAAGCAAGGGAAAAAGTGGTTAAAGGCCTTGCATAGCTTATTGGATACTATAGAGGATAAGGCTATTGCTA…
>Peanut_newGene_325	Peanut_newGene_325.2
GTCGCTCGTCCTTTTCTGGGGTCGGGTCCTCTTCGTCACCCAGTAGCCCTTGGCTACTAATGTTGGACCTGAAATGAACTGGGGAACCTGTGGAAGATTATTTTGAAGAAGATTATTCAATGATCCGTCACTGCAAATTGCTCTCTTCCATTACAAATCTTTGGAAACTCACCCACAATCTCTCTGGCTCTCGCTCCTTCATTTGCCCGGTACCTTTTGAGCAAAAGTTAATATCTTGTACCTCTATAACCGCATTCACTTCAGTTTGGAGAATTGCAGGTTTCTACAAAGATTTGAACTTTATTGAGCAGTTTAGTTCAATCAGATGCTATTGCCATAATGCTGGTGGGCATAAGGAATGGACTGAGGAAATTGAGTACTTGGATGAATCGGGTAGTA…
>Peanut_newGene_331	Peanut_newGene_331.1
GAAGACTTTCCTCCAGATGGTACTGAATGGAGCATAGAGTGGATTAATCATGATGGTGAAATTTTGTTTAAAAACGGTTGGAAAGAGTTTGTTGCATATTACTCTCTTGATCATGGCCATTTGTTACGGTTTGGGTACAATATTGGAACATCTCACATGGAAGTACACATATTTGACATGAGTTGCCTCCAAATAGAGTATCCTGCCAATGATCAGATCAAAGAGCAGCTGCCACGCAGGGGTCAGCAGCCGGTGAAAAAGCAAGAAGAACAAAAAACTAGAGATGTGGATAGCAATCGCAACACCCAAAACATGAGACTTAACGAGGGATCGCAGAAGAAAAGATTGAATGAACCATTGCCAAGAGAACTCCGAGGCCAACTGAGGAAAAAACTAAGA…
>Peanut_newGene_335	Peanut_newGene_335.3
GCAATTTCAGGCCTTTCTTGTATTTCTCTACTCTGATTCTCTCAACATCGGTAAGTGCTATTACCCTACACCTTATTATATAGAGTCATCATATGCTGCTTTATGGTTGTGTATGTAATTAGATCCAACCAAATCAAATTGTTGCATTACATTATATTGTTTCATCTCTGTTTTGTTTTAAGGAAATATATAAAGAAAGAAAGAAAGAAAAGGTTCCCTGTCTCCTCTGATCTGATTTCAGTGGTAGGTTCAACTTTCTCTCTACCTGTTAGATTATTAGGATATGATGATGAACAATGTTGTTCAAGTTTAATTGGAGGCATCCATGCAAGAAATTAAAGTAACAATGAATTAGATGAAGAGATAGAGAAATGATTGAAAGTAATAATAAAAAATAAT…
>Peanut_newGene_337	Peanut_newGene_337.1
CCGCAGATTAAATTTTGAAATGGAAGAGACTTGGAAGAAGAAAAAGAATGTGAAAAAGGGTTAGGTGGGACAGGTGGCGTAAAGATAGGGTGTCTGTGACGGTTACGAAGTAACCAACAGAAAAATGCAAGTGTATGTGTTTGAACTTTGAAATCGAAAGAGAGTTTATAAATTTATATTTATTTTTAATTTTTAATGTGCGATTCCAACAACGTGTCTCTTTTCTTTTTCTTCATCTCGCTTCGTTTCTGGACCTTACACTCTTTTAACAACAAAAACAAGAACATTACAACACACATCAAAATTTTCAACTACATCAATATCCAAATACCCTAAACCTAACTCTCTGTTTTTTGGGGGTTGGAAATTTTGTAGCAGGTGAAAATGGCGAGCTCAGTG…
>Peanut_newGene_341	Peanut_newGene_341.1
CCGCCTCTGTCCTCGTCGTCGTTGGCCGTCCCTCTTCTCCTCCTGGATCCCTTCCCCTCGCATCGCCGGGTCTGCTCGGAGCTGTTGTTGGTGTCGTCAAGCCACTTCTGTCCTTGTCGTCGTCGGCCTCCATGAACTGGTCTCTGTCCTCGTCGTCTTTCCCCATCTCTGTCTTCGATCCCTTTCTCTGTCGAGCTCACGGCGAAGTTCGAACGTTACTTTCTGCCGCCGTGGACTCTTCGCTCACTCTGCCGCCGTAGAAAATTACAGAGTTTGAGTCGGAACTTTGCAGAGCATACTCTTTCGGTGCGGTCTACCTCAGCTGGAAGACCGGCAGTTTCGGTTCGCTCTGCGGAAGCAGTAGTACCTTGGCCGAGCAAATCCACAATCCAAACACCT…
>Peanut_newGene_343	Peanut_newGene_343.1
TGGACTCATAAAATGAGGGCAGAAAATTTAATACGTCAGGTATTGCAAATTAAGGTTTTGCAACACCTTGGTGATTTTCCACAGAAATTGACACAGTATTGCCATGTTTTGTATGACTATGCCCCAATGCCTCCAGTTACATACCCTGAACTTAGAGATGAAATGTGGTGTCATCATTATTACTAGAGGAATCTGTGTGATGAAATCCGCTTTCCAAATTGGCCTATTGTTGAGCAGCTTGCAAGATCCTTGAAATATCCTTGGATGATGTATCCAGTGATGATGTAAATAAAAAGCACTATTCGGAGGTATCAGATGAAACATCTAGCTAATCAAAGCAAATTGAAAATATCGACGAGGAAAAGTTAAAGCGACGATATCGAAAACTTGCTATGAAAT…
>Peanut_newGene_347	Peanut_newGene_347.1
CCATGTGTCTTTCCCGGCTGCCATTACTTTGAAGTTTGAATAGACTCCCTAGTCCATAGTCATGAATTAAGCCACCTTATTGCTGCGGATGATGTCCTCTGCACGGCGTGGTGAGCTCTTCTATACAGCGAACTCTGACAAAGCCAACGACGATGACCACGACAAACTTCTTTGTACAAATGCTCCAATGAGGCCAGCAAAAAAGACTACGGGAAGCTCCTCTATGCAGCAAGCTCCGGTTAGGTAAGTGACGAAGACGACGAAAAAGCTCCTCAGTGCAGCAATCTCCGACGGGAACAATAATGAAGATGACGAGATAGATCTTTCAAGGTCGTTCTAAGATGTCCGATTTGGTCTCCTCCATGAACAAAGCTCCAATGTGCCTCTATGTAAGAGGGA…
>Peanut_newGene_365	Peanut_newGene_365.8
AAAAAATGCACTTTCTAGTTTCTAATAGGTGCATAACAATAAAATACTCTCATATGGGATAACATAAGTACATAACTAAGGAAATGGAAATTGTTAACATTACTAACCGAGTTAGATCCCTTACTGCATCGGGCCATTGTTTCTACATTTTGCTGTTCCAGATCTTTGAGGTATAGGCGGAATGAAGGTTTTGACTAAGTCGTTTTATTCTCTCCTGTCTTGATCTTCCAAGGCTTTAGGTTCATTTTCCCCCACTCTTTGTTATTATTATTATTTGGCTAAAAAATGCACTTTCTAGTTTCTAATAGGTGCATAACAATAAAATACTCTCATATGGGATAACATAAGTACATAACTAAGGAAATGGAAATTGTTAACATTACTAACCGAGTTAGATCC…
>Peanut_newGene_368	Peanut_newGene_368.1
TGGGAATTGGAATGGAAAAGAAGAAACAGAGGAGTCGGGGTTGCAGAGGGGCAGAGTTAGGGTTAGCCACCGTACACATATTGGACCTTCCAATTCACTTGCTCTCTGAGATCATCGCAAGGCTGCCAGCCTCCTCCGTCATCCGCTGCGCCTCCGTCTGCACCTCCTTCAGAGCCCTCGTCTCCGATCCCAGCTTCCGTTCCCTTTATGTCTCCCGTGCACCCACCTCCTTTCTCCTCCTCTCGCATAACAGGCGCCTCCTCTGCCTCCACTCGTGGGGCAGCGCCTCCTTCCTCATCCCTCACTCCTCCTCCTCCCTCGCCTCCTTACAACCTGCACCCGATACAAATCGCAATCGCAATCGCAATCGCGATCGTAACGTTAGCTGTCCAAGGTCAA…
>Peanut_newGene_369	Peanut_newGene_369.1
CAATAATTCAAAAAATACATTATATAAATGTGTCATGATATATTCTGATACAAAATCATGTAACATCCACTATATTCGTGCCAAGATCAAGCAACACCCATGAATTCAGAAATTCTTACGGAGGAGTGCTTTCAAAGATGCTTCATGGCGCCACCAGGAGGAGTCTGACGCAGAGTCCGTTGGGGCAGAACACGTGAGGGACCTTCGAGCTTCAGTGGGGCGACGACGACATGCAGCAGCGGCGGGCTTCGCCGAGCGTCTGACCCTGGCGATGTCTCGCAGTTGGAACGGAACGGAGCGGCCTGGATCGACTGCGCGGGCAGGGAAGGCGCACGACGAAGGTGGAAAGGAGGCGCTGCAGATTAGGATTTTGCTTCGACGACGCCGCGACCATGACAT…
>Peanut_newGene_374	Peanut_newGene_374.1
GAGAGAGACGACAGACGAGACTCAGCCACCGCAACTTAATTTCCGAGTTTGACCACATGTGCAGAACACCGGGGGCTGACACCTATAACACAAGGAACGGCTACGTGGCACTACCACACGTCTACCTTGCCTTACTGGATTAACCCCGTGGATACGCGTTCTAATCATTTTGCTAATTTTGGAGACTCGGTTCTGGAAACTTGGATGATGTGGTGCGCCATTCAGGCTCAGCAGGCTCACTCTCCCATCTTATAAGTAAATCCTAATCATTGGAACAAAATATATTCTAGCTTCTAACTTCTCTGTTACCAAGGAGGTGCACTTCTCCTTTTTGTTCCCAACATTAGCAGGTATACACATATTTGTCAAGCTTCAACATCAATATATACAGACAAACAC…
>Peanut_newGene_379	Peanut_newGene_379.1
GAAAATTAAACCCTAGCAGAGTCCCTTCTCCATGAAAACCAAATCCTAGCAATATTTTTTTCCAAATTCATGCAAGCTCCACCAGCATCGAGTCAACGCCGATTTGGATTTGTACGACCACCGTGCACTGCATTCTAGAAGGAAGATTTACTGCTTCTGCACTTGTTTTGTTCGCCTTCGTGTTTCTTCTTCTGCCACTGCGAAGTTGTGCGTAACGGTGAGGAGTTCAATTTCTCTGTTGGATTCGCTTCAACTTCGTTCCCGCTCGATAACTTCTTTGTGTCGCCAAGGTGCGGTTCTAGATTGAACTGCGACGATGAAGACAACGACGAATTCAGAAAATACTACTTTGCTACTGCATAAGCAATGATGAGGTTGAATGGCACAACAAAATCATTT…
>Peanut_newGene_382	Peanut_newGene_382.1
AAAAAAGGGTAGAAACTAGAAAATATCAGTAGTTTAATGTTAATTATTGTGATGACATTACTGCAGTAACTGATGTTAGATCAAATAGTGTCACATTTATTCTTCTGAGAAACTACATAGCTATGTAAGGCCAAATACTTGATGCCATTCTCTGTTCTTTGAAGAAAGAATTCCACAGGGAATAAACCTTGTATCATCAAATTTCTGGAATGGATTGTGCTTTAGCAACAGTTGGCTTAATGGCTTGCGAGTCTCGGCATGGTGAAAGAAAGCACTTCATTTTTTGGCCAAATCTTCTCCTTGTGGTGCTTTCGTTGGTTTTATGTCTGCTTGCTTTGCTATGTTGTTCCTGATGTTTCATTACGCTGCCTGTTTTCCCACTTGACATCTTACTACTGC…
>Peanut_newGene_385	Peanut_newGene_385.1
GTGAAGAGTTAGAGCCTTGACTTTTTTCTCAACGTGTCTGAAATAAAGAAAACAAGAAAACTGCAAGAAATTTAGTTAGGGTTTAGCTTAAACCTCAAGAACCAGAACCCTCAACCATGGAGGAAACCACCGCGCCGGAAGAACAGCTCCCGGAGAAAAACACATCCTCCTCCTCCTCCTCCTCCGTTGAAGAAATGGACGTGGACAGCCCCAAAGCAGAGGCCAAAGCGGACGACAAGTCTAAACAGAGTCGTGGTCGCGAGGAAGATGATAAGGTCCAGCCAGGCGACGACAAAGCTACTGATTCGAAGAAGCAGAAGGTAGATGACAGAAAGGGGAAAGCCAAAGTTGATGAACAAAGTGAAGAGAAGAAGAAGGAGAAAAAGAAGAAGAAGGATA…
>Peanut_newGene_63	Peanut_newGene_63.1
ACCCGACTTGAGCTGATACAGAAATTTTTGTCTTCAACAGCTTTCGGATTTTCATTTTCAAACCCACTCCATCACTTTTCTCTCTCTTCTCTATCTTTCTCTCTCTATATAGAAGATACTCAATAATACTAGCGATTGATTCTGATTCTTTGAGTGTTTCTTTTTTTTTTTTTTTGAATGAATTTTGTTTGGGAGGGTTTAAGGTGAAAGTTGAAACTTTTGTTTGGTTTTGGGATTCTGGGTTTTGGAAGTATTTTAAGGGTTTTATTTTGTGTGTTTTTGTTTGAACTTGTCGGAACAAGCTACTACTACTACTACTTAATTACTTTGTCATTGTTCTCTGCGTTCTTCTTTGTCGGTTGTCGTTTCAATTTAAAGCTCTGTTTTCCGTGTTTTGAT…
>Peanut_newGene_67	Peanut_newGene_67.1
GTTTACTAAGATCTCTTTTATTGTTGATCAAGGAAATGACAGCCTGGGAGTCACATTCCACTACAAGCTTTTTGAAGCCTAGTCCAAACAAAGTTGAACCCATTAAACATGCCCCGAAGTTCAATCTTATACGCTAAGACACATCCAATTGAATGAGAAAAGTCTCCAATTCACTTGCCACTGCAGTTTCTCAAAAGACCACCGCATCCTGCCATCCTAGTCGCGCCATTTTTTGATTCACCAGTGTTCAGTTTCAACCATTCCAGTGGAGTGGGTTCCATCTAATGTGTGCCTCTTCTCTTCTTCTAGCATTGGAAGGTTGTCTTCTACCCATTGTTTAAAGTTGGTACCGACTTGAGGTGCGTTGGGCCGCAGTAAGTTCATCCAAATTGAAAAGAC…
>Peanut_newGene_78	Peanut_newGene_78.1
ACAAGACATAGCACTTTATTTTATTTAATAATTGTTATGATAACTAGATTTAGCAATTCTGGTTCTGATTTTAACTAAGAAAAGATTGGGAGTTAATTATCACTCACTTCTTCCCTTTTCCTTTTCACGCTAAACAAAACCCTAACCCCTTCTAAGCTTACCCTCCACCGCCACACTCTTTTTCCCAATACCCAGCAATACCCAAGTACCCAACGTAACTCCAAAATAAAAAAAAAAAAAGAACCAAAAGAAAGAAAAAGAAACATCACCAGCGCAGGAGAGAACCGAGGGGAGAGAGAGAGTGAGGCGTCTGAGAGAGAGAGAGTCAGAGGGAGCTGCTACGCCGTTGCGAGGGAGAGGAGGCGCCGCTGCTGTTATTGCCTCGCCGTCGCCGATTGA…
>Peanut_newGene_89	Peanut_newGene_89.7
GCTGGATACTAAGAGCATTATAATAATCTTTTTGTCGTGCTAAATCTATGACGTAGACAAGCAATAAATTCTTCATATCCTCAATTTGCTTCCAGCATCTTCATTTCATGATTTGAGACAAATGCTTCTGGTGTTTGATTAGTATCTCCAAGACATTAGAATCGTGTGTGTATGCATGGTGGGTGTTGCAATGGGTTTGGATCCTTTTATGCATTAGTTTGTTTTTATAGATCTTATTGATATGTAGCTGGAGTATTTAGTAACGAATGATTTCATATTAAGTCTATCATGTCATTTATTGTTATTGGAAGACTGCCTCTTGCGACATTGTCCTGTGCACTATATATACATATTTGCCATGTAATTAAAATTTAAATTATGCCTATTGCTTCTATAGGA…
>Peanut_newGene_90	Peanut_newGene_90.18
ATTAACTCCAAACCTCCAGAGACTCAAAGTTCAGAGTGAAGCTGCTGCTGCTTCTTCTCCAACGCTTGAGAGTAGAGACCAGAGACGGAGTCACCATCACCGAGAGAGGCAAAGAAAAGATCAATAGAGCTTCTTCTTCTCCGACGATTGAGAAAACCCGCTGTCCTCCATCGGAGAGCAGAGCTTCTTCTTCTTCTTCTCCTCCTCCGCCGAGCCCGCCGCCGCGCCATCCTGTTCATGTAAGTTCCTCTCAGTCTCTCTGATTATTATACTTATTTTTGCAGTTGTTGTATCTACTATTTTCATAATGAAATTTTAAATTTGCATTTGTTAGTAACAATCACATCACTGAAACCTAGTTAGCATAATCAATTCATCACATTTCATCAATTGCTTCGT…
>Peanut_newGene_95	Peanut_newGene_95.3
GTTGCAGTTGAAACGGTGATGTCAAAGATGACAAAGATCAGAATCTTGTTGTGACAGAACAAACAAGAAACTGACTACTGAATGGTTTCATGGCTTTGTTTATAACTGGATGTGAACCACCACCACCTTTGTCTGCATCGTCATCATGATCCTCACTGCTGGTTGTAAATTGTGCACAAAGGATGTGGATAAAGCTTGCTGCAAAAGCTGTATATGAATTTGCTCTTGGCCATGAAATCCGAGGGTTGTGTTCTATTTTTATCTCACCTCCCAACCACCCGAAAATTAACCAGGTGCAAAATCATTTTCCTTTAAAGAGCCTTCATGAGAGCATAATATCAGAAAATTGTGCATTGCTCTTATGACTCTTGTTTTTCTTTACTCTGACCTGATCATCAT…
>Peanut_newGene_396	Peanut_newGene_396.2
CCAACTTGAAATGAAATTATCCTCATTGCCATTCTGATGGATCATCATTAGCTGGATATCTTGTATGTATCATCATCTAGCTTTTCAGTTGATTGATGTCAATCTTGATTTGTGAAATTGTTTGATTTGGATGATGTAGGTTACTCTAATCTAATCTTGTTCAATCCTTGATACCTCAATTTCTTGATTAGAAGATGAAAACCTGCCATGTTCAAACTGGTCCTTGTGATGTCACTAAACAATTTCTTTCAGGGTATTGTGAGGCTCAATCCCTGCTTCAAGATTACGGATGGAAATATTGTGGCCAACTTTAGAGGCAGTAACGTTGGCATTGGAGGAGACAAATTCACTGAGACCACCACAGTTCCAAGATTCAGG
>Peanut_newGene_397	Peanut_newGene_397.1
AACGTAATCGTCAAAGCCTAGATGATCAACCATGTCCATGTCCATACGGCAGCAGACGCTAAAAGAAGAGCTGCGGCGCGGTATCCCGCGCGACGGTTTTCCTCTTCAGCGTCGCTCGCAGCTCCTGGCCGTTCGTTCCTTCCCGAGCATTGCATGCATCGTGGAGGCGGTTGTCGCGGTGCAGCAGCGCCTGCAGCTCCTGGCCCTTCTTGCCTTGTGGAGGCGGTGGCTGCGGCAGCCTGCTTCACGGGCGATGGGCGAGGTTCCTCTGACAAGTTCAGCGGTGGCGCGGTGGCGACGCTGGACGGCGACGATTCGGAACGGCACGGCATGGGGATCGGGAGAGGGAGCAGCACGACGAAACAGTGCGGCGTGGACGGCAGGGTGAGAGGACGGCGT…
>Peanut_newGene_398	Peanut_newGene_398.1
CATTCACCCACTCATCATCTTCTTCTTCCTTCTCTCTCTTTCTCTCTTACCCCCCTTGAACATAGCCGAGACTCGTGGGGGAGAGAGAAAAAAAACAAGAGTAAAAATAAAGAGAGAGTGAAAATATATACATAGATGAATATTAGATAGCACACATAGATGAACACATAGAAGGGCATTTTGGGAATATAAATATACATGCTATGAGGAAGCTTTGTCTTTTGAGGGGAATGTTGTCTGGCTCGAGGACCCTTTCATCATATCATCTTGATCATCCATAATATCGAGAAATTCTGCTCATGGAAGTCATGGACTACTACTTCATAGTTTGCAGATTGGTGTAATGATGATGAATTTGACCAATTTTGTTCTTCACTTCACTTGGAGGCTCAAAAGGTT…
>Peanut_newGene_408	Peanut_newGene_408.1
GAAACCCCCCTCCTTTGGAGCAAAACCCTAGCCGCTTCTTCCTCAGGTTCCTTACCGCCACTGCCCCAGGTTCTCCATTCTCGTCGCTTCCGCTTCTTCCTCTTCCTCGGCTTCGGAACCCAGGTAGCTCGGCCCGTCATCCACTGGCTTCTCTCTTCGTGGCTTGGAGGTTGGAGCAGCTCGCCGTTTGCTGTCGCCTCACCTATCGCCGTCGTCTCATCTCTCGTCGGTTGTCGTCCGTGTTTTCGTCGAAGAGGCATGGGTGATTGGAATGGGTCAACATTGTTAAATGGAGAGTTCATGCATATGAGGTGTTGTGCTCACATATTAAATCTAATTGTCGGTGATGGTATGAAAGAGATTGATAGCTCAATAACTAAAATCAGAATTGCATGCAAG…
>Peanut_newGene_411	Peanut_newGene_411.1
GGCGGTTCCAATTCGGAAGGCTGCCACTCCCTACCACCGGAGGTGTCAACCCGGTTCTCCGACTCGGGTTGTCGCCTCTGAACCCGGCTCGACGTAGCGCTCTCCTTATCAACCCTGAACCCAACTCTAACCCGAACCGGTTCGCTTCTTCTCCTCCAAAGGAGAAAATTTTGGTTGAACCGGTTGAGGGTTCGGAGAATACACCTGAGGATAAGGGCACAAACAACCTCTTGCTCCGGTTTTGTGTGAAAAAGAGGGACCTTTCTGCTCCCAGTGCTGATCCTGAACCTGAACCCCAGGCTGAGGCTAAGGCTGAGGTTGAGGAGGCTGAGGTTTTGGAGGAAGGAGAAAGTAACCCTTTGGTGAAGACATGGAATTTAAGGCCGAGGAAGGTTGTGG…
>Peanut_newGene_417	Peanut_newGene_417.2
CAGACCATCAACATAATTACTAATCAATAATTGAGCAGATACAATAATTCCTCACTTTTTCTGCACTAGTTTTGCTATAAACCTTAGGTTGTTATTCTCACTGCGCTGAAGTCATTGTTGGAACTTAATTGGAATTTGGGATGATTCTCTCTAGCCACTTTATCATTAGTAGGAGCTTCTAGCTGCTGATGGAGATGGCTTACGAAGTTTAAGTCAACCTGCCGTAATTCAATTCAACTCGGTTTTGTGAATGTAGCGGTTTGTGATTGTGGTTCTGCTTTATTACAGATGATCTCAAGCCATATGCACTGCACCCAATAGTGGTTGACATCCTCCAACAACTCACTATACTTATTGCATATACATCACATGCATCTAACTTCATGACCTAGTTTAAAT…
>Peanut_newGene_421	Peanut_newGene_421.1
CCCCCTCTCTTCTCTTCTCTTTAATAAACCTTGCATTCATGTATAGTTTCTGATTGTCTTCTTGTTTATTAGGGACTCAACAAGTCACTCATAGAAAACAGCGCAATAACACTAGGGAGGCTTGCATGGGTCTGTCCATAACTTGTATCTCCGCATATGGAGCATTTTCATGCAACCTTGGTGCACTGCTCTGTCAATGAATTGGTTTGTTGCAGGATATGGGATGATGTTGAGAGAGAAGACGCTTTTAGAGGCCTATGTGCTATGGAAATAAGAAGTGAAGATTTACACAGTGAAGTCTGCCAGGTTTTGCATGGATATAAACAGATGCTGCGTAACGGAGCATGGGACCAGTGTATGTCTGCTTTGGAGCTTTCGAAATATCAAGTATAATTTACG…
>Peanut_newGene_422	Peanut_newGene_422.5
CCAACATTTGGAGATCCCTTTTTCATTCTAGCTTGAACCTATTCTAAAGCTTTCTTCTTTGACATGGTGAATCCTTGTTAGCCTTGGTTAGAGATAAGCAATCGTTGGTCCAAAGGCACGATGAAACTGGTTTTTGCTCATCATTTTCATTGGGTTGAAGTTTTGATTGTGAGTATTATGAAATGTTTGTTGATGCTCCAAGTTATGGGCTTGTATGCTTCTTGGTTTTAGACCTACTACACTAATTAGACTTGTTAGCACACATTTGGAATATATTTCCTAGTCTTATCTAAGTTGAACGTGATGGTTTGGTCAAAATTAAATTCACACCAACAATTCTATTGCAAAATATTTGATTATTTTTATGTTTAATTATCTTTTTTTTTTCCAAAGGTGAGG…
>Peanut_newGene_432	Peanut_newGene_432.1
TCTTCATTCAATTCGAAGTTCATCTGAGGTGGTAAATTGGATTGATATGTCAGAACCAGAAGGAATGTATAAGAAATGAAGAAATGATGGAGAAAGTTGGAAGTAGTAGTTAAAAGGTTTTGTTATTGGTATATTTTGCCCCTTTCCATAATTTTATCTTTTCCTATTTTGCAATTGGAAAGAAAAAATGACAGCTTGATTAGTGGAATGAAATCATTTATAAAATGGTGATCCTGTCTTTGCCAAATCTTTATATATATGCCTAACCAAATTCACGTTACATATCAAATTAAATAAGGCTAATAAACTGGTTTCCAGGATTGAAATGTACTTGTTTTCCCAAGGTGATGAAGATATAGCTAATGTCATTAGAAGCATCAGACAACAATTTAGTTTCTA…
>Peanut_newGene_433	Peanut_newGene_433.1
ACTTTTTGTCCCTAATGTTTGCAAAATTTTTCAAAATGACCCCTAATATTTAATTTGATTCAATTGAAACTTATTTCTAACATTAGGGACAAAATTGAATCAAATTAAACATTAGGGATACTTGTGAAGAATTTCACAAATGTTGGGTATAAAAAAAAACATACTTTACCCATGTTCAAATGTATGGTTTTTGGTCAATTGTGTCCAGCTTAGTTGTTGGAGTTATATAGGTTAGTACTTCACCGTCGTCATGACCCATCTTTGGTTAGTACAACCCTGTTTTCTCAGTGACGGTTTTTAAGCGTCCATATCGTTTTGCAAGTTGGTCATTTCTAACATGTAACATGCATTTAATTTCATCTGATTTACTATAGGCTGAAGATCTAGCAACTGGACGAG…
>Peanut_newGene_437	Peanut_newGene_437.1
TCAGAACCTTGGTTATCAGTCCTCACCTCAAGCCCTGAACGCCTCCCATTCCTCTACACTGCAGTTCCTCACCCCCAAAACAGTCACAGAAGTCTCTCCCCACCCGGCAAGGAGTGAGAAACAGCGCCGCCGGTTGTTGCACTCAAACCCTAGCCTCCATAGTCGCCATCGTTCTTCTCACCGCCGCCGTCACGCCATTCTTCGCCAGCTTCTTTTCTTCGCGCGTCGTCAGCTTCTTCGCCTAGTCCAGCACGCCTTGTTGTCTGCCGCCAGGTCCAGTTCGTTGCGTCGCCAGTTTCTTTGCCTGGTCCAATTTTGTCGTCCGTTGCGTCACTAGGTCCAGCTTTGTCGTCCATCGTGTGCTCGTCGTTGCCGCCAGCTTCTCCGCGTCACATTCTT…
>Peanut_newGene_438	Peanut_newGene_438.1
TTATTTGTTTCATGATAAGTATTTTTATGAAGAATGAGATGATGATACTATTAAGTTCTGTACTGTCTTTCATTATTTTAATCAAGTGCTTTTCTTTCTCAGGTTAATTAATCTATTTTGTTGGTTAGGTTTGGTTTCATTTCAGATTTCTGTATGACTTACACTATAATACCTTCTGAATCTCTAATTTTGGTTAGGTAAGAAACTTGTATGCTTCCTGCTTAGATGTGGGTTGCTTTCCCGTTGAATAATACATTGGTATTTGAATAGTACATATTTCTGTTAATCATGTGAATATTTTGTCATATGTATGTGACATTCAAAGACAACTTTTTGTCTTAGATGGATGAACATTTGAATGATGTAAATGCAAATATAGATAGTGAGAAATATCAACCA…
>Peanut_newGene_442	Peanut_newGene_442.1
CAACCAATCAGGATCCATCTCTCATCCCTATATATATTCCCACTACAATACCTTCATTCTTCATCTAAACCTACACTCTCTTCTCAACTCACACGCAACTTAACCTTCGAACCACCGTTCTTTTTTTCTTCTTCCAACAATGGCTCCAGCGAAGGCAGAGAAGAAGCCGGCAGAGAAGAAACCCGCGGAGAAAGCACCAGCGGAGAAGAAACCGAAGGCGGAGAAGAAGATCTCGAAGGAAGGAAGTAGCGATAAGAAGAAGAAGAGAGTGAAGAAGAGCGTTGAGACTTACAAGATCTACATCTTCAAGGTTCTGAAGCAGGTTCACCCTGACATCGGAATCTCGAGCAAAGCCATGGGGATAATGAACAGTTTTATCAACGATATCTTCGAGAAGCT…
>Peanut_newGene_459	Peanut_newGene_459.2
ATAGCAGCAATCCATGGTGGATAGCTCGATCCCTTCCCAAATCAGCCTACTGACACCAAATTGCTCTGATTTAGTGTCAAACCCACCAAGTCCACTGCTAACCCTAAACCATCTAGTGATGATTTTACCCAAATTCAATTCAGAATATCCAAAATCAAGAATTCGAGAAACCCGCCAAAGGAGAGTACAAAGCACGCGAAACTCTTTCCTGCTCTACCGTACCCCACTCTGTCACTGTGGAGTCGCGTGGCTGCCGATCCACCCTTCTCCCCCTGCCATCGACCCTTCCCAGAATTAGATCCATAGCTTAGATTCTTTATTGCGTGAACACATAAGGGGCAGAGGGACGAAACACACCTCCGCATGCGATTCCTTGCCGTCGTTCCCCTCCGGCCGCCA…
>Peanut_newGene_464	Peanut_newGene_464.1
GGAGGCTCCCAACCTACTGGAAGTATGAGGCCGCGGCTAACTACCTAGTAAAGGCGACTTTTGAGGGGCAGTTGAGAATGTAAAAACATAGTCTACGTATTGACAATCGTTTTTTGGAATAGGCCGTTGAACCCTCGACGTGTGATAGGTTACCAGGAGGCTGGTCGCCAGTATATGGCTGGTAGGCTTACGACCATGGAAAACTTCATGGTAGCCTCATGCTGAGGAGGTTCCTGCCTCAGATGCCTCAAGCTGAAGATGATCATCATGAGATCACGCCCCCATCTCCTTGATAAAATGAAAGACGACATCAAGTGGAAAGGGGAAAGAGGTTGTCGTGATGGAGAAAGCTTTTTTGATGCCCCAACTTTCATTGATGAGCACTTGCTTTCGGAGACA…
>Peanut_newGene_468	Peanut_newGene_468.1
CTTCAAAATGTGTATACTAATCTATGTCAGTCTCCTGCAGTGTGAGATTCATCGTCAATCCAAGCGAGAAGTGATTTGTTGGAAGACATCTTCAGTGCAAGGAATTGTTAGACCTCCCATAGGATGATCATATCCGAACTCTTCCTCTGCTTGGCTCAACAAGACTTGGATTGAAGGTTGGTTCAGGTGTGAAATGGGGATCACAAACCGCTTCTGTTTCTCTCCGACATACACTGCTAAATGCCCCTTTGGGACTTCCACAGATTTAGAAGTTGCTTGGCTAGCTGAGAATGATGATGTCCTTCGAATAACAGGAAATTGGTTTGAAGATCCTAGCAACTATATATACACCACTTCTTGTGTTCTGAAGCAACACCAATCATTCACATATCCTCAAGT…
>Peanut_newGene_469	Peanut_newGene_469.1
CTGTTTTTAATAGTTGTGTGAATGCACAATGGGGCTTGGTCTGACTTTTGTGATCGAGTCTCAGCCTTATCTGAATGCTATTTTGATGCCACTTGGGCTTAAAGTGATGTGCTTCAAGGCCTGCACACACTACCCAACTCTCTTTGATCATTTCCAGAGGGAGCTTCGGGAGGTTCTCCAGGACCTTCAGAGTAAGTCCTTGCTCCAAGACTGGTGCCAACCGCAGTCTTGGAAGCAACTTAAAACTCTCACCAATTCAGGTAGTTTTTACATTATAGAGATTAACCTGTATACAACTTTCATTTGGTAACTAACTTTGTCAATTTCATAATAAAATATGTGCCATTATGGTTAGAGTCATACCTTGCCTTGAGATAAGGCCTGGACAGTTTTTGTAAG…
>Peanut_newGene_470	Peanut_newGene_470.1
GAAAAGAAGACAAGGAGTAGAGAAGAAGTAGAAGAGGAAGAAGAAAGGTGAGCTGAATTGTAAGTTGAATTGAAAACTCACATATACATGCTTAGAAGAATTTCTTAATTCGTCAATTTCGTTGTCCTGCAAGGATCTGTTTTTGGATAAGAAATTTCTTCAGAAGACAAAGAAGAAATACAACTATTATTGAAGTCAACTTGCTCTTCTGAAACAACACCCAACTCTTCTGAAACAGAAATGGTGTGAAGAATATAAAGAATGAAAAGAAGACAAGGAGTAGAGAAGAAGTAGAAGAGGAAGAAGAAAGGTGAGCTGAATTGTAAATTGAATTGAAAGAAAGAAATCTGATTAACATGAAAACCAATCATATACAATCCTGGTAAGGTGAACAAAGAA…
>Peanut_newGene_471	Peanut_newGene_471.1
GAAAGATGTTTGATCACAAGTTTGAGAATGAACCGTCTTACTATAGTGATTATTCATATGCGGAGAGTATGTCTGGAGTAGAAGATTCTTATTCTGATTATCCGCCACCATACAACGGAAGATTATTAGAATGCAGGAAGAAATTGAAGAAAGTGAGGTCCACCAATAATCATAGGTCGTTACACACAGAATCATTCCCTAGAAGAGGAAAATCTCAACCTGTTAGCGCAAAAACTTCAGGAATATCAACTCCAATTGAAGATTCAGATGCAAACGAAGGTTTTGAGAGTTCATCACCGACATTAATCGTAAGGCAGACAGCGCTAAAATTATCATCCTTGAAACTAAAGAGAAGCTTGACCAGAAGCGTATCCCCGGACACAGAATTATTGAGGAGAA…
>Peanut_newGene_475	Peanut_newGene_475.1
GAAGCGAAGGAACCCTAGCCCTCTGAACTGAAGCAAAGGAACCCCGAACCCTAGCCCTCATCGTCGCCGCCGTTCTGAGGTCGTCAGCGCTGCCGCCGTCCTCAGCACCGCCGTTTCTTCCTCTTTCCCGCTTCTTCCTCGAACCCAGGTGAGTGCTCCTCGTCTTCATCTTCTCTTAACTTCTTATTCAATTTTTGTACCATATTTCTTCAATTCTTCTAGGGTCTTGGCTTGAAGTTTGGTTCTTCAATTCTTCTTCTTCGGTCTTCCGCCTTCGTTCTCGTTTTTCGGTCTTCTTTGTATGTATGGTTCTGATTGCTGTGGAAATTCCAAAATTTGTATGTATGGATTGGTTGCTAATGCTGGAAAGTGGAAACTGTTACTCTGTTTTAGTGTTTT…
>Peanut_newGene_480	Peanut_newGene_480.3
CAAATGCTTAACAAAATCATAGTACACACAAATGGGGTATTCTAGTCTTTTTACATAAACGGAGTTTAAACAGGTCTCCACGGGGCGGGGACCTCTATCCCCGCCCCCGCCCCGTTTAATATACGGGGCCCCGTCCCCCGTCCCCATATCCGCCCCGTGACGGGTAAATCCCCGCGGATACCCGCCCCGCTGGGGATTTTTGCCATCCCTATTCATTCTGGTACTTTTCCCCTTTGATTTCTTCATTTTTAATGTAAATTACAAAATAATTAATTTTCATAATTCGCTGAGTTAACTATTTCATATAGAATCGATTATTATTTTTTGTTTGTTTGTTCTGTTGGCCACTTTGATTAAGTTAAATAGTTAATAGAGAATAATGTAAATTTATTCTTTACT…
>Peanut_newGene_481	Peanut_newGene_481.3
CTTTTCTTATATATAAATTTCTTTATATGTTCCTTATTTCGGTGTTGAAATCTTGCTTATTATTTTGCTTGCGTTTTGATTCCTAAGGGGCTCTTCTTAGTCTACGATCTCGTTTGGTTTTCACAAGAATCATCGATCAACAATGACTCGCGGTAACCAAAGAGATCGAGACCGTGAGAGGGCTCAGGCCAGAAACGCTGGAAAAGCTAAACAGTCTAAGAGTGATGGATTGACCCCAGAACAACGCAGGGAAAGAGATGCAAAAGCTCTACAGGAGAAAGCGGCAAAGAAAGCAGGTCAGGCTGCTGGAGGCAACAATGCAGGTGGTGGAGGCAAAAAGCTTTAGTAGGATTGTGGAGTTGAGGGTAGATATGAAAATTTGAAACTTGTATTGCTTAT…
>Peanut_newGene_486	Peanut_newGene_486.1
TTATAATATATCCGCATTTCGGAAGTCTATTTTATTTGAGTGGTGTAATGTATTCTATGCATACTAAATACAAAATACTCTGTCAATCACCCAAATAGTGAAATTATTACCTTATTCTTGTTAAGGGGATGAAAAAAAGATAGGAAATTTTTTCCTATTCCAACCTAATTCTTCCTAAGATTTCTATTTAGATGAACTGGCTCTTACCAAAGTTATATATCGAAAATGAGTAACCGCGGAACCCCCTTTAACACCCCTTTTCTCTTTTTTTCCCTCTTTTCAAAGTTGGATTTCTAAGTTCTTTATTGAACTCATTTATTTGCAATCATGGTTAAAATGTAAAAAAGATTGGGGTTGACTACCAATCTTTTCAAAATACAGAAAAAGCTTCTCGTAGAA…
>Peanut_newGene_490	Peanut_newGene_490.3
ACCTGGCTTTTTCCCCTTTCCACTTCGTGCCATTGTGCTTTACCAAATCAGAGAACCACTCTTCCCATTCCGTCACTCATCACCCTCCCGCCATCACCTTGCTCACTCACCGTCACTCCTCTTCCTACTCACCACTCACTCCTCATGACTTCGCCATCGATCGCAAGAACCATCACTCCTTTTCGTCTTCTTGCTCTGACCGTCGCTGCAAGCTCGGCATCGGGAAGACTCGATGCTTAGCAACGTCTTCTCTTCGTTCACCGTCGTCAAGAAGGAGTGTTCTCAAGAACAGGGATATTATAATGGCATGTGTGTGCAACAGTGCTACTCTGCGAATTTGCTTCAGCTTGCATTTTGCTTACTCTGGTATGTGCAAGGTCTTTCAATTTTAGTTCTTAC…
>Peanut_newGene_503	Peanut_newGene_503.9
ATTTTGTCTCATTATGTCTATGTCTTCAATATCTATGTTCTTGTGTCTCTGTCTCAACCCATACATAAATCAAACGCAGCCCAATGGAACGGTGACAAAGTCTTTTAATTTGCAGCGAGGTCTATGCTAAGGTGATCTGATATCCCCTTTTCTCTTTGTACTTGTCGGGAAAGTACTGAATAAAATGCTTGTAAGGTTGGGTAGAAAAGGTCTTTTCCCTCCTTAGTTGATACCAAACATCTCTTTACACATTTTAATTACTAATACAAGCTTGGTAGTGTATTAAATTGGGTTCCCGTTTAATTTCTCACATTTGTACACATTAATAATTTGACAGTTGAGGTTTTTATTATGCCTACCAATAAATACTATAAGGTGATTGTGGAAGGATTAAATTTG…
>Peanut_newGene_506	Peanut_newGene_506.1
CTGGAAATTAGAAACCCTACATTGTTCATGTTCTGAAATTGGTTGTGTTCCAATGGCAAGTAATGAAGGAAGCTCAGCCACTTCTAGCCACCGTGGAGAGAGAGGGAGATTTGTTCATGAGAGAGCCAATAATATGGGTTTAAACAAGCTAAGGGACAACACCGAAATGTTTATGTGGTCTTTATGCAATTATCTTAGAAACAAGTTTAAGTTGCTGCAGCATTCAGATGTAACTGATGTTTTATAAATATGCAAGTCCGCCGTGTATCTCAACTTGTTTTGAAAAGGGAACATGCATACATTATTGATACAGTTGTTATGGATTGTCTGGAAACTCCAATGAAGGTCAAGCAATCTTTTCTTATTGCTCCACACGAATCACATTTTCAAATAGTACAC…
>Peanut_newGene_510	Peanut_newGene_510.1
GCAAACAAATTTATAATGTTATTGTCTAGTAAATTAATTATCCTGCCTCTATTTGTTCATATTTCAATACTGAGTATTATATTCATTAATATATGGTGTGCCATGATGAATTACAATGCGCTGCCAAGAAATTTTAATTCATTGTTTGAATGTGTTGGGAAGCTAATGGGACAAGACCTGAGCTCTTGTTTGTTTGATGAACTTGTTGATTTAATGGTTTTTTCTTAATTATGCTATATTGGTATATCTGTTATGACAAAATTATAATGCTAATTACCTAATTCCATTTCAATTTCAAGAGGCCAACAAGAGTGGTAACAACTGGTTACCTCTACCATGCGTAATTGTTGCCTTGCTTATTCTGGGATTTAACGAGTTTATGACACTTCTAAAAAATCC…
>Peanut_newGene_516	Peanut_newGene_516.2
GATTTTCAGGCCGTGTTGAAAGAATTTCAGATGGCATAACGACTTACGGCAGAGAGGGAAATAGCTTACACCCCATTGTTCCACAAGCAGCTCCATCCAGGATTTTACTATTGTCCCTGCTGTTGTTGATCTGGCTTGCGTGCGTGATGCTATGAATAGACTTGACAATGATTCTAACAAGATCAATCCTCTGGTACACATCGCTCTTATTTCTTATAACTTTCATGTGCTTTGGTTGCATACATACATGTGAAATCATTCCTGGAGACCACCAAACTGATTTCAATTTTTAAATATGCATGCTTTATAGAATTCTAGAGAGTCTACTTCAATGGTTAGTTTTAGCCAAAGACCCAAAGTTGGAATAGGAATAACCTATAGGAAGGACCAAACTTACCA…
>Peanut_newGene_518	Peanut_newGene_518.4
AACTGAGTTGAAGGATAAGTTGATGGGGAAGAAATTCTTGATTGTTTTGGATGACGTGTGGATTGATAATTCTTATTCCAGGCAGTGGAAAACCCTTCAGAAACCTTTTCAATTTGGAAAAAAAGGAAGCAAGGTTCTTGTTACAACTCGAAATGATACTACTGCTGATGTAGTGAAAACTATTTCAGCATACAAGCTGAGTTTATTGTCAGAGAAAGATTGTTGGTCACTTTTTTTGAAATGTGTATTCCTTTCATCTGAATCCAAGGAGTATTCGACTCTGGAACCTGTTGGTCGAGAACTTGTCAAAAAGTGCAAAGGGCTACCTTTGGCTGTAGAGTCGCTTGGTGCCTTATTACGAACAAACTATGATGAAAGGGAATGGGATAGTGTACTGAA…
>Peanut_newGene_519	Peanut_newGene_519.2
TCCAACCCTTCTTTTCAGATTTTTACTCCTCATTTGATTAGAAACCAAAACCCTAGCAGAGCCCTTCCCCCATCGAAACTAAAACCTAGCCAAGCTTCTTCCCCAAATTCATGGAAGCTCCACCGGCGTCAGTACCGTCTCGCCGCCGATTTGAGTTTGCACAACCACCCGTCACCTTATTCTAGAAGGAAATTCACTTCAATCATTCGTTTACGTTCATGTTCCATCATCGCAGCTCACATCAGTTCACCGCGACTGTATGCTTGCCGTCGTCGCTGCCGCGCCTCTAGCCGGATCCTCTGCGTCGCGTGTTCGCGTTTGGTCTCTCTTCTCCGTCACTCTCTTGCTTAGCGTCGAGTTCGCCGTCGACGAGGAAGCTTTGCCACCGTTTCTCCAGTG…
>Peanut_newGene_523	Peanut_newGene_523.3
GAGATATTTCCACTTTCAACCAAATCAAAGACCATCTTATCATCCAAGTGGATGGCACGGACATAAGACTGATGGAGAATTCAAAAGTGGTTGTGGAAGGAATAAATTTGGTGATAACATACCTGCTCCATCTCTTATCCTGACTAAGTTTCTGCCAAAAAAGCCAATCAAAATTGGGTTTAAGGTGAGCAGCTAGTAGGAATCATGCACTGAGATGATGTCTGTTACTAAGCATCTGCGAGATCGATTTTGAGTGATTGTTTCTACAGATTAAGGAGTTTCACATATTAGGTTTTGGCTACTATTTCAAGATGACCAGCTGGGTCCAGATGATTTGCAATTGAATTGGAAGTGATCGGGAGCATATTTTTAAATTTTGGGGGATAAAGACCATCTTTG…
>Peanut_newGene_525	Peanut_newGene_525.2
ACGCCATTGATTCAGTGTTCGATCCCCTCAGAGAGTTCGCCAAGGACAGCGTAAGGCTCGTCAAGCGTTGCCATAAACCCGATCGCAAAGGTACTTTTTCTTTTTATTATAATTTGAATCTCTCTGCTGTGGATCTGAATTTTTCCTTTTCTTTTGTAGAATTCTCCAAGGTTGCTGTTCGTACTGCAATCGGATTCGTGGTTATGGGATTCGTTGGCTTCTTCGTCAAGCTCATCTTCATTCCCATTAACAACATCATCGTCGGATCTGGTTAGGATGTGGTTGATTTTGCACTTGCTTACTGTTATTTGAAATTAGGGTTTAAAATTATGCAAACTTAGATAAAGTTCCTTGTTTGAGTTATCTCCTTATGGTTTTCAAGTATCATCACCATATATG…
>Peanut_newGene_528	Peanut_newGene_528.1
TGCAATACAAAGTATTTCCATGGATCCACCATGATCAGAAGAAAGAAAAAGAAGGAATATGTTGGATTCAGAGATCAAAGAAGCTATTTTTAATCTGGATAGCTTTAAAGCTCCTGGAAGAGATGGGCTACAAGCGGTCTTCTTTCAAAATCAATGGGAGACAGTGGGGGATGATCTTTGCGCTCTTGCTCAATAGATTATTGTAAATCTAGAAAAGATTGAGGAGCTGAATAAAACTCTGATAACCCTTATTCCTAAGACTAATCCAGTCACAAGACTCAGCCAAATGCGCCCGATAAGCCTCTGTAATGCCACTTATAACGTTATCACTAAAATCCTGGCAAATTATACGAGGAGTCTTATGGATAAGCTAGTTATGCCGACCCAATGTAGTTTCAT…
>Peanut_newGene_534	Peanut_newGene_534.1
ATTGAAACCCCATTCACCTCCTCTGTATTCCCCAGATTAACTTTTGTTTGCCTCTTCTTTCTCTGTTTGTTCGGATCGGTGTATCCAGCTCTAGGATCTTTCTCGTGCTTTTTTTCTCCTTCGCTTTATCTCTGTTGTTTCTTATTCTTCCTCCTCTTCGTCCTCCCATGGTTTCTCCGTCACGAGCGACGCCTCTTCTGTCGGTGGTGTCCACAACCTCATAGAGCGTTAGCCTCTCGCTCGGCCGCTCGGGCTCCTTGGCGATTCCGTTTTTTCACTGAAAATGGAAGTTCGTTGGGGTCGATTTGGATCTCGATGGCGCCAGAGATTCAACGACTGTCAACGGTAATCGATCGGCGAGGTGGTTCTGGTCCTTTTTTTCAGGTCGTAGAAGAACTA…
>Peanut_newGene_539	Peanut_newGene_539.1
GGAAAAGAAAATGGGTGGAAAATTTAATTTTCCTCTGTTTGGATCAGCAGGGAAATTGCTTGGAAAACAAAAAAGTATATGTAGGGCCCAGCTTAATTTTTTCCGCCCAAAGCTGCGAAGAAAACTGGGATGAAAATGCCAAAATGGATAAAATTACATATATGCCCTTTCATTAGTAGCAGAACAAAATCCCTAATTCACTCTTTTGAAAAGAAAAACACGTCTCTTCTTCTTCCCTGTTTTTCCGTCATCTTCAACAGCGACGCCAAAGCTTCCTAACTCCGTCGGCATCGCTGCATGAGCTTCATCATCGTAGTGACAGCTCCACCGCATCTTCATCCCTGCATCCTCATGCCAAAGGATTGTTCTGTTCTTTAACTGCTCTCTCTTCTCTCCTCT…
>Peanut_newGene_541	Peanut_newGene_541.1
AGGTGCTAAGCTTAGAAGTATTGCTTTGGTATTGTGAGAGTTATCTTCCAATCTTACTAGAAGAATGTCAGGTCAATAATTCTGAAATTAAAGAGGTTTTATTTCCCCATTTCCCCATGTTTGTTTTCATTAGTATTACACTTGTTAATCGTCATGTATGTATGCTCAAATTCTTGTGTCTCTCTATACTTTTCAGGAAGCAACACGTGGAATTCGAATGTGCAGAATTTGGAACACCTCATTTGAAGCCTCTTGTCAATAGTACCCTGTTTGTCCCATAATAATGAATGCGTTTTCTAAACTCAGTTGTTGAAGCATTTCGTAATGCAAAGAATGTAAAAAAGTTTTAGTTCTACATAAGGACTTTCTAATTTCTACTCTTGGTTCTATTATTATATA…
>Peanut_newGene_545	Peanut_newGene_545.1
CCCATGGCTCCGCGACTACGTGGATTTTGATAAAACCTTCTTAATGGGAAGCAGCGCTGGGGGAAATATAGTGTACTTCGCAGGTCTACGTGCACTCGACCTTGATCTCTCGCCGTTGAATATTCGAGGGATATTAATGAACGCTCCTTATTTTAGTGGGACCCAGAGGTCAAACTCGGAGCTTCGCTGGGTCAACGATCGGATTCTTCCCCTGCCCGCAAATGACCTTATGTGGGCGTTGTCGCTGCCCGAGGGGGCTGACCGCGATCACGAGTATTGCAATCCGACGGCTGCGGATGCGGTTCACGGAGAAAAGATCGGACGGCTACCTCTGTGTTTTGTGAACGGGTACGGCGGGGATCCTTTGGTGGACAAGCAGAGGGAGTTAGTTGGGTTGTT…
>Peanut_newGene_553	Peanut_newGene_553.1
AGCCCACTAAAGTAAAGCAAAGCTATCATTATATATAGACACTTTTAACAAGTTAGAGGAATCAACCAAGAAACAAGCAGGAAGAACCTAGCTATCATTATGTTTTCGAGGAACAGACATTCGCACTAATTTTCTTAGTCATTTGACAACAGAATTGAAGCTTGAAAAGCTTCATCCTGGAGATGCGGATGGGGTCTCCAGATTTCGACGAAGAAGAGGAGATTCCGTTGAAGGAGGAAACTTCCTTTACCTCTTCTTTGTCTTCGCCGACGAAAGGAGGACTAACTCATCACAGTAATCGCAACAGTCATGCTTTCAGTTTCGAGACCACCACGGCGGCCGTGCTGTTCTGTATTCGGCTTTGAGGTCATCAAAGGCTGATGAGCCAGATCCATGGTC…
>Peanut_newGene_557	Peanut_newGene_557.1
ATAATATAAGTCAAAAGAAAAGTAAAAATCTGTCAAACAAACTATAGCTAATTCAATGTCCAAACAATTACATCAAAATTTCAAATATCCAAATGAGTGTCAAAAATACAAATCCAAATGCTGCAGCAGTCTCAAGTTTCATCGATGTAGACTTATTATCAAAACTAGCAAGAGTTTCCACATGCACCGCAGCATCAGTCAGCCGAATTTACTCAATCGCGATGTTCAAGCACAGCAGCAGTCAGATGCTGGAATGTCATTACACGAGTATTTCAAATCGCCGGAAGCAATTCAGGTATTTGCTATGGATGGTGTTCTTTGTTTTCGAGCACACGTCACACACTACTTTCTATTGATGATGCTGATATACAAACTTGATTTATCTTTTTTATTCTTACC…
>Peanut_newGene_570	Peanut_newGene_570.1
TTGGACTCTCTAATTTGTGTTTCTTTTGTTTTATATATACAGGGTACTATAATAATTCTATTAGGATTGTTAATTAGATTGTTAAGGTACCCTAATTGAAGTTGGGTTCATCAATGGGTGGGGGTGAAACTGTCAATGGGGCATGGCTAAGTGCTATTTGGCCACTTTCAAGAAAGATTGTATCAGATGAAAAAGAAGCAATTGGAATCCTGGCATCTGAGATTGTTGGAGTGATGTCTAAGATTGTAAATTTGTGGCATTCTTTAAGCGATCGAGGCATAGCGAGTTTAAAAGAATGGATAACAAACTCGGTCGGGGTGAAAATGCTTGTTTCGGATGACTATTATTACTTGATGGAACTTGCATTGGATGAGATTCTCAGTAGCTTTCAATGTCTAG…
>Peanut_newGene_573	Peanut_newGene_573.1
CTCCATCCCTGTTTCTTCGATGGCTGATGACGATGTCCTAGGTCTGGGAAATAAGGCTGGGAGCGGCACCAAAAGGAAGTCTCCCGGTGACTCCTCAGAAGAAGAAAAGGAGAAGGAGGACAAGGGATTCCAAGTAGAATCTCCAGATAACAATAACAAAAGAGCAAGGACAGAAGAAGAGGAGCAGAACGTTGAAGAATTAGGTTGCAACCCTGATGTTGCAAACCAAATGATGAACCATTCTCGCTTCTTTTTGTTACTCAAAATGACTCCTCTTGAGGCCAGGGATTACTCCCTCATGAATGAAGCAAGGAATCTGATTGGTCAACTTCAGTTTCTTGCTATGAATCTCAATGAATATCCTGATTTTCTGACGCAATTCAGGG
>Peanut_newGene_574	Peanut_newGene_574.2
CTTCTTCTTCTTCTTCTTCTTCCGTGAACCTCCTTCTCTTCTCTCCGTCACTCACTCCTTCTGTTCACCCACTCTCCACCACCGTCCTCCTCCGGCAACGCCGTTTCAGCTGCCGCGCCGCTTCCCCCGGCCCACCTCCAGCTCCCGGGACTGATCCTCCTCCCGGAAACGATTCCGGCATGCTTCGAGCAGATCTTGCGGCATCTTTATCAAAAATTCAAGACAGAGCACAGATCTTCTTTGCTGTTCTTTTCTGGGTGTCGCTATTCTTTTGGGCTTCTGCCTGGGATGGGAGAAACAGACCAAACAAGTGATCAATATCTAGAAGATTATAAAAAAAGAAATAGTAAGCATTTAATTTGTATAGATAGCATATCATAATCTAGGGGGACAATTTTT…
>Peanut_newGene_583	Peanut_newGene_583.1
GAGAAGGCATCTGCCACCATTGACTTGTCAATAAGCTGCACCCAGATGCTGCACGAGATAATAAGCGCGCAGGTTGCTGACTTGGAATGCAATTTTCCTCAACTCCGTTATGTATCACTTTGTGGTGGATGTCCTGTTTTTGTGCTTTATCGGAAAGCTTTTGACATGTCGACATTGGGGCCTTTAGCTGAGACTCGTGTTCAATCCTTGATAGCTCAACATCTTCTGTCGATTATGAGAACCTGCCTTATTGAATTTGCTCCTAGTGATGTCACTGAACAATTTCTTGTAGGGTATTGTAAGGCTGCACAATTTCTTACAGGGTATCGTATTCCAGTGGGATGTCAACCACCATGCTTGGACCTTCTCTCCAAGGCTGGCCCTGTCATGATTAAGGAT…
>Peanut_newGene_585	Peanut_newGene_585.1
AGTATGTCATGTACCGTGTCATAACTAATTAACTATGCATAGTTTGATCTACGAGGAAAAAATATGTTTTTGTTCATCAATTACAAAAAAAATGTGTGTCTAGAAATTTAGGGTGTGTCTTTAGCATCAAATAAGTAAACAACAAACAAAATGCATACTAGACTACTAGACTAGACCCTTTTAGGCAATAATGGTGAATCTTCAACCTTCAATCCATACAGAAAATGTAGCATGGACCTAGTGGAACCAATTCCCTTTTATGACAACTCTTATTTATTTTTCTCAAACATAGTACAACACACACCATAATATAGTACCATAAATATGCCTGAAACATGGGAGAATTAGAATTAGCAAACTTCAACAACCATATTCAACTTAATTGTTCTTGTTCTTGCC…
>Peanut_newGene_588	Peanut_newGene_588.1
ACACCACCAAGTCCCCAAATGCACACTAACAATACAAAAATACACACACACAACAAGAGAAAGGGAAGAACGGAGAGGGAAAGAAAGGAAAAAAAAGGAAAAAGCTGGAATCAGAGAGCAAGAGAAAGACAGGGGGAAGAGGGAGGACGGCGCCGGCGGGCACTGTCGCCGTGCCGTCGTGTCGCTGTCAGGAAGGGGGAGACGTTGAGCAAGAGGAAGAGTTGCTTGATGAAGGAGCGCCGCTGTGCCTCCATCCCCCCCATCAGTTCACGTTCTACTGTCGTTGAGGGAAGCCGCCGTTGTAGTCGTCTTCATCTCGAGCGGGTTGTTGCCAGCTTCAACCACCGTCGCATCTCCCATTACAGACGAAGTTGAGGACGCGCAGGAGAGACAGTTGCG…
>Peanut_newGene_589	Peanut_newGene_589.2
ACAGAGATGAGATGGACCTTCGTCATCACCATTGGTGTGGTCGGAGTCGTGGTCGTTGTTGTCGTCGATTGAAGGTACCGCCGTCGTAGTGAAAGAAGCCCAAAGAGAGAGATGAGCAAGGCCCGAAGAGAGTGAGCGTCGCTGCCACCGCCATTGGAGATGAACCCAGTTGTTCTCTTACTGTCGGAGCTGCCACAGAACCACCGTGGTTGTTGCCTAGGAAACGGAACGAGTGTGGGGATTGCTAACGGAGCTGCCGTATTTGGCGATTTTCGCAATATTCGACATTGAGGTAGGGGATTTATTTATGTCATTGGGGTTTACTTTGAAGTGTTTCATTCATCCATTAGTGAGATTTAATTTATATGGACATTGATGTTGTGTTGTTTGTAATTGGTG…
>Peanut_newGene_597	Peanut_newGene_597.1
TGAAAATTCATCCAAACCAATCCAATGAGGATTTGGGAATTAACTTTGCTTAATAGCCATAGGTAGATTAATTTTTATAATATTAATTTGATAAAGTTTTTCAAAAATTAATTAAAAAAATCTTATATTCTAAAAGAAAATAGAAGTTTCAATTAAAAGCAAATGAAAATGGTTCTTCAATCAGAGAATTTACCCTAACGAGGTTCTCCAGTCCCTCCTCAGCCGCGTTCCTCCTCATCTCGAAGCCACCGCCGAGCAGCCCCGCAGGTCCGCCGCCTGGTCTCTCTCGCTTTCACGAATCCGCTGATCAGGATCGCCGGTCCGTTGCGTTGTCTGTCTCTCGCTTTTACATAGCCGCCGCCGCCGCCGTAGGCTCGCCGGTCCGTCCCCCTTTCCAGT…
>Peanut_newGene_600	Peanut_newGene_600.1
AAAATACATAAGTTTATTAAGACCATGATAGTTATATGTATGCAAAAGCAAACTATATAGAGGAGAAACTACCCAAATTTTGGAGAACAATTTGAGTTCAACTAATAAAGATGAAGAGCAAATGCCTTTGAGGACCATGATGCCAATTTTCTTTGGAGGGAGTTCCTCTCTTTGAGTGCAAGTGCAGGTGAAGAAGAAGAAAAGGGTTTGTGTTTGTTGTTGGAATCAGAATCCATGATGATTCCTTGCAAAGAATCTTTGACCTTCTGGAAAGAAAAGTTGAGAAGAGCAGAGTAGCCTCTCATGGAGAATGCAGCTTGATCATAAGCCAAAGCAGCATCTTCAGCACTCTCAAATGTTCCAAGCCAAACCCTTCTTCCATTCCTTGTTGTGTCTCGA…
>Peanut_newGene_605	Peanut_newGene_605.1
CAAAAGCCATGTTCCCCTTCCTTAGCTTCTTCTCTTTCATTTTCTCCCTTAAACCCTATTCCTCTTCTTCTTTAATTCTCGCCTCTCTCTTTTGCTGTTCTGATTGTTCATTTTCTTACAAATGTTAAATCAAATTAATTTTGCTGTGATGAATTTCTGGGATCTCTTTCAAGGAGAGAAGAATTTGCCGAACGGAAATGTGAGGATGCAAATAAGGGATAAAGCTAGATACAAAATCAGATATGCAAAGCAGATTAAGAAAGATACCCAATTTATGGTAAGTTAATTACTACATGTTGTCTTGAATTAATGGTCAACAATTAATAAATATTAAGAAAGATACTACGTGTTGTCTTAAAATTAACATGTTAGATAAATACATATGAATGGTTCTACATT…
>Peanut_newGene_607	Peanut_newGene_607.6
AGGGAATTGAAGCAAAAATCAAAAAGAAAAATAAAAATTTTTCCAAATTTGAGAGTTGAATGAACAGACCTTCAAGGCACTTGGGAAAATTAGGGTTCATTCTAAAGTTGTGCTTTCAGTTGCGGGAGGTGAGCATAGGCCATCTCTGACACTCGTTTCTGGAAGTGGATTCTTTTAGCAAGGTTTGGACAAAAGAGAGACTCATTGATTAAGGCAACCTCACCTGACAGCAGCAACAAAATCTACCAAATACCGGAGTCAAGCGATTCCAAAGAGTAGAACTCGGAGAGAAAGAGCAGAAGAAAAATGGAACCTGAACTTTGCTCCATTGTCGCCTCTCCTCTCCTTTCCTCGCTCCTCTCTCTCTCTCTCTCTCTCTCTCTCTCAAGGTTGAAAATC…
>Peanut_newGene_608	Peanut_newGene_608.1
GTTGGAGTTACCCTCACCCCTTTTCTCCTCCAATGAACCCTTCCTCCTGTTCTCTTCCGGGAAAGATGGCTGGAGCCCGACCCGCCGCCGCAAGGACCTGAGCTTGTCAGCTGTTTTTGGTGGGACCGAGGAAGGCGAGTCGGCAACGATCCCTGGTTGATGGTCGTCGTCCCGTGACGGACCCCGTGATTTGTGGCGCCGCTGCGGAATCCACGTCTGGGGTTGTGCGTCGACCCGGTGCCGGCTTTCTGTGTCTGGTCGCCGGTGTTTGTGGGTGCACGAATTAGCAGGCTCTCTCCTACAGGTTCGTGGGACCGCCAGATCTGTGAACAAGGGAGACGACATCAGAAACGGAGGCCTACGGAGAGGACGTCGGAAGTCCCAAGCGCTTACCTTCAA…
>Peanut_newGene_610	Peanut_newGene_610.1
CAAGGACTGCCGCCGTCCGTCGCTCTCAGGCACTACCATCGTCGTCTGGTCGTCCGTGCTTCTTCCTCCTTCAAGAATCGCAGCTTCTTCTTCCTCGAGCTCGGCGCGTCAGTTCCTAGTATTCATCTGCTCCATCGCGCTCCTGCCGCCGTCCGTTGGGCGCTCAGTCACCATCGTCTTCGTCTGGTCGTCGCAAATTCTTCCAACCCACCACCCTCTTCTGAGTTGTGTTCGTCACCTGGCCTCTGTCTCGGTCACAATTTTGCCCCCCTCATCTCAGACTGCTCAGAAGAAAAACCCATCTCCTTTCCAGTTTTCTTCCTTCGAGTTCAGAGAGGAGAAGTTCAACCAAGAAAAAAACCTTAGACTTCGACGGTCAGTTCACTGCTAACTTCTTCT…
>Peanut_newGene_620	Peanut_newGene_620.1
CTTCTGCTCCGCTCTCTTCTCCGGTCTTCTTCTCAGGTAAATAATTAATTTTATTGTTTAATTAATATGCAGGTTAGGGAATAGGGATTTTGATTATCAGATTTTGTGAATTTAGGGATGTGGGTGTTGATTTTGATTATTAAGATTCTGATTAAGGGTTTGGGTGTTGATTTTTTATTATTAGAACTCTGACTAGGTGTGGGTGTTGATGCTTCAAAACCCAAATGGAGCATATTTCTTAGCTTTTGCTACTGTTTTGCACATTCAAATTTTTTCTTAAATTATTCTAAAGTCCTAATAAGAGTGTGAGTTTGTGAGTTTGTGTTTTTAATAAGAGTGTGAGTTTGTGTTTTTTGTTAAACATGAAGCTAGGGAAGACAAGGACAAGGTACAAAAATG…
>Peanut_newGene_622	Peanut_newGene_622.1
GCCAGATCAGTACGGCAAGAAAGTTGGATCAGATCGGAACTCTAATAAGAATAGCTGTCACGACAAAGATAGCGAGACTAACGTCCAAGCTTTGCTTCACCACAGGTCATTAAGCGATGATGAACAGAAATTGAATGTTTCTAAAGTGGTGACAAGTAATGAAACCAAACGGGAAGTAGATAGAGTATTCACCTTTGACGAGGTTTTTGAAGGACAATGTTATCATCGTCCTCCTCTCCTAAATGGCACCAACTACCTCTATTGGAAGAATAGAATGGCAATTTGGATCAAGTCGCAAGATTTAAGAATTTGGGATGTCATCGAAAATGGAAACCATGTTCCGATAAAGACAACATCAAAGGAAGTGGGAGAAGTTGAAACGTCAACCGAAGAACTTAA…
>Peanut_newGene_624	Peanut_newGene_624.1
AAAAAAACCCTAACCCCGATGTCCCAAATGCCTAACCCTCCCCTGCTGCTCGAAGACTCTCTTCCTCACTTCAACACGCCATCGTCTCTCAGTCTCTCTTAATCTCACTCCAGAACGACGATCGCCGGCCGTCTCCGAGTCTCCTCTGCTTCGTCTCGCAGGCTTGGGTGCGTCTCCGACTACGTCGCGTCTGTAGCTACCCTGTGCCATCGCGTCTTTGACTCGCAGTCGCAAGCAACCTGCCTCGTCGCGTCTCCTTGCTCCGCGTCTCTCGTCGTCGTCCCGTCCTCTCCGTCGCTGCTACCTCCCCTCACCAGAGTCTGCTTTGCCGTGCTCATCCATGTTAGTCTCCTCATTTCTCTGCGTTCGTGAGGTGAAATCCCTTCGCCCTTCTCTCTG…
>Peanut_newGene_643	Peanut_newGene_643.1
AAATCGGAGGAAGGTTTCGCCGTCACCACTCACCATGCACTACTCGCCACTCCACCAGAACTGTAGCTCCCTCTTCGCTGTGTGCTCACCGTTCTTCTTCCTCGCTAAACACTCACCACTCACCACTCACCACTCGAGAACCATTGCTCCTCTTCGGTGCGTGCTTACATCGGGAAGACTCTGTGGTCAGCATCGTCGTCCCTTCGCTCACCATTGTCGAGAAGGTATGTATTTACCTTCATTTGGTTCTAAAATTTGAGAGGGTTCCGATTTTAGGGTTTTCATTTTGGGGGTTTGGCTATTGTTGCGGCGCAGGTGAAATCGTACCCAACACTCCGTTCAAACAGGTGAGCTTGGCCACCACCAACCTTGCCCCAGGTTTCAGGAAGTTCTTAACTG…
>Peanut_newGene_654	Peanut_newGene_654.1
AGCTCATATTTTAGTATTAAATAGTATAACTGTCGTCGTAATGTCCGAGCTATCAGAGTTGCGCAGCCGGAAGCGTAAGCTTTGGTAGTTAGGGTGTTACACATCGCGTCTGCACCCTTCATCGCTGTCGTCATAGAGCTCTCTCCGCCGCCGCTCTTGTCGCATTTGCTCCCTTAGTGAATTTCAGGTATAATCTGATTTTGTGATTTTGGTGCTTAGGGCTCAATTTTTCTGTGCCAATTTTAGGCTTATCAATTTTTCTTCACAGTTTCTATCTTTTTGTTGCTGTTGATGCGGATTGATCTTGTTGTAGGTTTATCAGTTATTTTACTATCATCAAAGAAAGAGATTCCAGATTGACAACAACATAGAGATGCCAGAGTTATGCCCTGAATGGTT…
>Peanut_newGene_656	Peanut_newGene_656.1
TCTATTAAAGTGTTGCCGGTGGAGTTATAAATGGAGAACAAGGTGATCGTGGAGCCTCTGAATTCGTTGACCTCTGACGATTTCATTCAGATTGTTGAGGTAATGTTTTAAATCTTCCACTTCTGCACTGTCTTCCACCGCGGGTTGTGCCGCTGTTCTGTTTTTCCTCCTGCGGCTTGAAGCACTCAGAGTGCAGTTTAGGCGCAGATTCGGTAGTGTGGTTTGGGCGTGGATTCGGTGGTTCTAGCTAAGAAGATCATGAAGGCGAGCTAGTGACTATTACTGAATATGTCATATGATATTCTTGAACAGGCAACAAATTACTTCAATGATTCAAATAAGCTAGGAGAAGGAGGATCAGGTTTAGTTTACAAAGGATGCTGAAGAATTGACTGAAGT…
>Peanut_newGene_658	Peanut_newGene_658.1
CTTGCCGTGCTCCTGTCCTCACTTTCGGCTTCTACGATTACTTCCTGTATTTCATCGGTGCCGTTTTCGACACCAAGGGTGCGGATGCAATTCTATCTTTTGAAAAGTTCTGCTGCAATCTCCCCAGACCTCTTCTTTAGGTTCTGGTTTCTATTTGGATTAGTTTTCTCAATTCGATTTCGATCCATCTGCTAATTAATTGGGTTGATTAATACCAGATCATATATGATTAATGTGAATGAAGAACACTAGGTTAAGTTGAATTGATTTGAATCATGGATAAGAGCATGTTAGCTGGTTTGGAATCATTTGCTTTTGCTAACTTTTCCAATCCACTATGCTTTCTTTACTCTCTTGATTTATTACACTGATTTAATGTTCTCAATGTTCTGTAGATTC…
>Peanut_newGene_662	Peanut_newGene_662.1
TTGCAGGAAAGACAGTTTTGCTTGTCACTCATTCAAATTCTGTGTCTCCTACTCTTTGGCGGAAAACACAAAACTGATTCCTCTCTTTTCACACTGTTAATCACCACTCTACTCAATGCCTACTTTTGGGAACACAAAGTACTGTTCGGTTGTGCACCTCCATTCATATAAGGATGCTTCTCTGTCTCTAACATCTCTCTGTTTGGATTTAATGTTACGTTTCTCCTATATTTTTCTTTTCTTTTCTTTTTTAGGCAATGTTTATTAGAAGCTTGTTTTGTTAATTCAATGATGAAATCTTTCCCTTCTATTTTTTACCTTTTCTATTAGGATTTTTCTTTTTTACCTTCGTGTTGCTCCTGCTTGCTTTCCCGTGCCCTTTGTTGGATTTGGTATAAG…
>Peanut_newGene_668	Peanut_newGene_668.1
CAAGAAGAACTTTGATACCTTTTACTCTTTGATACCATTTCTAAAATTGGTTTGATTTTCAGTGAAAAAAAATGGCAGCAGCACTAGTGGGTGGAGCTTTACTATCTGCTGCACTTCAAGTGTTGTTTGATAGATTAGCTTCAAAGAAAATGCTTGACTTCATCAAAGAAAAGAATCTCAGCCGAAATTCGGTGGAAAATTTGGAAATCAAGTTGTTATCTGTGAGTAAAGTTTTGAGTGATGCAGAGAAGAAACAGATTCATGATCCAGAAGTTAAGAAATGGGTCAATACGCTGAAAGATGCAGCTTTTGATGCTGATGATATCTTGGATGAGATTGCAACTGAAGCTGAAAAAGCTTCAAATTCAGGTACTGTAATTCTTTGCCACCTCTTGGCCA…
>Peanut_newGene_673	Peanut_newGene_673.4
TAGGGAGATGAGAAAGCAAATGTCGCGGTGGTGATACCCAAAGGAACTTTGCAAGGTTCTTTCTTTTTCACTTCCATTATTATCTTTTGCATATGATGCTTTGGTCTTCTGAAGTCTCTGTCTTTGTCATTAACTTGTCTGTTTCTAATTCTCCATAATAGCCACCATATAGTTATGAAGTAGCTTATGATTGTCCACTCTTGTTTGTCGATGGTTCCTCAATTATGAATTTGATTGCTTTGAAATCATTCCTGGTAGTTCATTCGTTAGTGAATTTATTCCAAACCATAATTTAGGCCACTCTGAGAATCATTTTCCACTATCATTTGCTTCACTCCTTCCCTAGTTCCGCATTGACTGGGACATTGGGGGATCCTCTTCCCAATCCTGTGGGGAAAA…
>Peanut_newGene_681	Peanut_newGene_681.1
CTGTTCTTGTTTGCAGTGTCACTGTCCGTGTCTTCAGCCAAGAGCAAAGACTCTGTGTCTCTCTTACACCATTGTGTGTGTCTTTGTGTTTCTGTTTTCTCTCTCTTTCTCTCTTCACTCTGCTGCACCCATCAAAGGATGGAACTTTCCTCAACCTGTTCCAAAAACTTCACACTTTTGGAACCATGCATTAATGGGGTTGTAACCAAAAACCTTATCTAATCCAATTCTTCTCCGCAATTCTTTATAATAATATTATTAACAACAATAATACTCCCCCTTTCAACTTTTCTATTCTTCTTTTAGTCTTTAAGTACAAGAGGGTACTTAAACCCCAAAAGCTTCAAACTTTGGGATTTCCCATTCTCAGTTTCAACTTCTCAAGAACAAAGAACCAAC…
>Peanut_newGene_685	Peanut_newGene_685.2
TCAACCCTTGGTTACAAGTCCCCCATCGCCGCAAGGAGTGAGCCCCAGCGCTGCCGTTCGTTGCTCTCAGGCACCACCGTGTCTTCGTCCGGTCATCCGCGCTTCTTCCTAATTCAAAAATCGGTGCGTCTTCCTCGAGCTCGCCGTCAGTCGCTGCCTTGTTGGTCTTCGTCTGCTCAGCCGCCGTCCGTCGCGCTCAGCCACAGCCGTCTTGGTCTGGTCGTCGTGGTCGAAGAATCCAACCCCTTTCCTCATTCACCAAGCGCAGCTTCTTCCTCAACCTCGCCATCCGCCGTCCGCTCTTCGTTTGCTGAGTCACGCTTCTGCCGCCGTTCGTCCGTCGCCTGGTCTCCATCTCCGTCTTGCTTCTACCCCTCTGCTCAGACTGCTCAGAACGAA…
>Peanut_newGene_686	Peanut_newGene_686.1
GAGCTCCAATAACAAAAATAAAAAGCGCCCTTATTTCAATTAATTTTTTCTTCCTTTCATACTTGTTTTTCAAATTTCTTATTGATTTTCAAATTTTGAATTTCACCGTCATACATCATATATGCATTATTCTTACTTATTTATAACTCCTTGCTTGCATTGTTTTTTGGCCTTTGCTCATCCCCTCCTTTATTTTTCCAAGTCAGGAATGTTAATGTTAATGTCCCTCAACCGCAGCAGCAGAATGCTGAGTCCGTGTGGGCGGCGCTAGGGCTTGCAGATGAGCTTGCGGTGCAGCCTTGCTCTGAGGTGAAGAAGAATGGGGTTTCGCCTAGGACTGCAACAACGCTCATTCCAGGTCCGGCAGTTGTTACGTTGGGGTGGAGAGGAAGCCAGGTT…
>Peanut_newGene_695	Peanut_newGene_695.1
CGAAAAGCTAATTTTATTGTATGTTAGTTGCTTGTGAGATATGAGTCTGATATCTCAAAATGCTCGCACTAAAGCTAAGAAGACCCAAAGGGAGGAGGACATCAAAGAACCTCTCAATTATGAAGAGGTTGAGGATGGGAAAGATTCTGATGATGAAGCTCTGCAGGCAAAGAAGAGGAAGCGAGAACAGTCAGAAATGCAACAAGTGAGAGAAATGAAAAAGCTGGAAAGCTTTTTGTTTGGCTCTCTGTATTCCCCTGTTGAATTTGGAAAGGAGGATAATGAAGCAGAAATTGGGGATAAAAAGAGCTCGGATTTGTTTTTTACTGACTGTTCTGCAAATAATGTGCTTTCTATTTATGAGGAAGATGCTGACATTTCAGAGGAAAGTGATGATGA…
>Peanut_newGene_699	Peanut_newGene_699.1
GCTGCAACCACAAAACAACAAGCTTTATTAGAGAGAGCTTCTTCTTCCAATCCAAAACCAAAAACAAAAACTCATCTTTCCCTCCACCCTCTTATGTCCCAGCCTAATTTCCAGGCCTTGGTTGTGGATTTGTGAAACCAAGCCCCATTGCCGCGTTTTCTTTTGTGGGGTGGTGTTGTGGAGGCAAAAGGTTCAAACTTTGAATAAAGCTGGAGTCTTTTGTGTGGGTGGTTTCGTGGGTTCTTGTTGTTGTTGTTGCCAGGTTTGTTAAATGAAGGCGATGCCCTTTCCTTCTGAGGAATTTCAAGGGAAGGGAGTGTTGGATTTCTCTTCTTCTTATTGTTCTGCAACAGATCTGTTCTCACTGCTTCACCATCAACAGCAACTTGTTAATAATCA…
>Peanut_newGene_702	Peanut_newGene_702.1
AAAATTTCATCGAATGGCTACCAATGCTTTTTTAAAAGCTCTCTTCTACATCCTTTTCCTGACACTGCTCTTGCCTTCAGAAGGAACAATGAACACAGTGGCGCGAACACATACAGTGTGCTTTCGTGAAAAATTCAAGTATTGTGATAATGATGAATTTCGTTGCGACACTTTCTGTATAGTTAAGGGTTTTGGATTGGGAGGCCATTGTTCAGGAAAAGCTTGCTGCTGTCCTGAACGGATCCCTCCTGCATAGTTACATACACTATATTTATATGTATATATATTTTTGGATACATAAATATAAATAAAGAGGATGCACTCAAAGTCCAAAATAATAATTGCAGAAGATCTTAGTCTAGTGGGAACTATCTTTGTCTTATAATAAATGTATCCGAA…
>Peanut_newGene_711	Peanut_newGene_711.1
TGGAGCTTCCCGGAAACCCTATTGTAAGCTATCTCTATTTTCAATTCCATTAAATTCATTTCCATTTCCGATTCCATTGAATTTGAACTCTTTATTTTGTTGCAACCTTGGTTACTGCTATGAGAATTATTGATGTCGTTGTTACTGGAGTATCATTGGAATTGACGTCGCTATTAACCCGGTTAATGCTGCCCCTAGGATGTATGCCTTGGTCTTTGTTTCTATTAAATTTCCTTCCAAAGTTGCTGTTGCTGTTCCCGTGGGGGTTATTGTTATCACTGTCGCCATGAATTGAAAGAAAAGGAAATTATCACGATTAGTTACGTGGACTCAGCTAACTGAGGTAGGGGTTTTTATTAAAATATAATTTATATTACAAAGTTGTGATAAATAGATATT…
>Peanut_newGene_720	Peanut_newGene_720.1
TGCGTTATATTATTCAGGAGCCAAGATCTTTTATTCCATCAGTGTTCTTCAAAATACTTTACATTTTGCCTCGTAGCAATCAAAGTTCTTACATAGCTGGATTTTCCATCATGCTACACGTTAGTGATAGCAAAATAAGATTGAATCAAATATGAATATAAAATGGCTGATGCTTCAGCTAATCTCTTCAATTTGGTTCAACCAAGCAAGATTGTCACCAAGATATTTTCACTTAAATATTGCCAATTTTCGTCTCATGTCTCTTCTTTGGGTTGGCCTATTGGAGAAGCCTAAATGCAATTCACAATAAAATCAATCATATGATGGTAGTTATGTGTAACTTGGATTTCTAAGTCCAACCGCAGGCTGGATCTAAATCTGAACTCTCCATTTGCAACA…
>Peanut_newGene_722	Peanut_newGene_722.1
GTCGGTGGTAGAGGCCATAATGCACATGCAACTGATTTGCCTGACGTCTTTATCCATTTTAGGTTGTTCTTCCCACATATGGTTTCCGGTGGGTAGTATTCCCGCATCACTTCAAAAGTTGACGATTCAGAATTGCAGAAAATTAGAATTCCAAATGAATGGCCAACATCACTCGCTGCAGGAACTATTTATAGAGAACAGCTGTGATTCAGTTACATCCTTCTCGTTGTTGGATTCCTTTCCGAATCTCGTGCGTGTTAATATCAACTTCTGTGACTACATGGAGTGTATTGTAGTGTCACGCTCTCTTCCATGTCTCCGTTCTTTATGTATCTTCGGGTGTGGGAGGTTGAAATATGTGTCAACGCTATGGATGGCAGCACCTCAGCTAGAGCATCT…
>Peanut_newGene_724	Peanut_newGene_724.1
TGTTCCGGCAAGAATTGGTTTTTTTGCTTCTCTCTCTATCTTTCAAATTTCAAATTTATCATTCTCCCTCTCTCTCTCATTGCCGATTTTGCTTCTCCTGAAATCAAATCTCAACTCATGCACTACCAAAGCATGAATTTTCACTCTCCGAACACATGAGTGAGTAAAGCGAAGAAGTCAATTGAAGAAATCGGAAGGTAGACAATTTTACTTGAGTATAGTTGGATCAGAGTCTATTTTTTTGAGAAAATTAAAACATGCAGTTTAAAAAGTATTTGCTATGGCTTTTGCATGCTCTTGCACACCAACAATCTTGTTATTTATTTTTTTCCTAATAGAAACATTCCTTTTAGAGTTAAAATAGGATAATTTTTCCATATGGTAAGAAACATATGGATG…
>Peanut_newGene_729	Peanut_newGene_729.1
TTTTCTATTCCTTTCTTCCTTCTTCTTTCTGGCGCCATTGCTATTGAATACTCACTCTCCATTCTATTCTTCAAACTCCATTCACCTTTTCTCTCTTCTCTTCTCTTTTTGTGTTTCATTATCTTTCCAAAAAACCAAAATTTCCATGGCAGAAACTCTAAGCACCTCTGTTTTTGCATCAATGGCATCCCTTTCATCACCAAAACAAGCTCAAGAACTTGGTATGATGAGCATGAAAGTGGAAACCAATGCTGGAGCTACACCATCACCGCCACCACCACCACAACCAATAGCAGTAGCAACAATGGCTACAACAAGTGGGAGCTTAGAGAATAAGAAGCTGAAGAAGAAGAGAGGAAGGCCAAGGAAGTATGACCCAAATAGGATCATGGGGTTGAC…
>Peanut_newGene_731	Peanut_newGene_731.1
ATCCTCCCTCTCCTCTTCGATTTTATCATGGGGAAAGTCTATAGGCTTTTTGGCTGGGAGTATAGGAAACCAGAGAGGGCTCCTGCAGCATGTCCATACAAGCCTGCAGCCAAGAGGGATACTGCTAAAGAAATAGCCAATGGTGTATTGGATCATGAACCCCATTAATCTCCTCAGTGTCTCTTTAGTAACTTGGATACATAATGTTATGGAAAGCTGTTGAACAAAATGATATTTTGTATTCTACTTTCAAGCTTATCTCTTACAGCTTATAACAGGAGTTTAGAATTTAGATTTGGTATTGGTTCTGAATCTTGTTGCCTAGCATATGCATGGCACTATCTTTGATTTGTGATTTGTTCTGGATCTGCCACCAACAATATGATATGCAATAAGGAA…
>Peanut_newGene_732	Peanut_newGene_732.1
ATTTAATATTTTTCTGAATAAAATTATTGTGCTTACTTAATTCTGCGCAGAAATGATCTAACTAAATAATTTAGCTAGGAACATATCCAAGTGACATCACATTTTAGTAATAAGATTATGTGATGAATTGATATAGTAATAGTAGAGTATAATATTTGTTGATAAATATTAACATTCCCTGCCTTCTCATCCACAACATACACACTTGTTTATGCCAGTTGTGTCCTAGTGACCATCGAAAAACTTGGATAGGTCTAGAGCTCCAACGCCAGCACAGATCATTCGGCGGCGCCATCTTCCTGTAGTTGAGCCTCTCAATAGAAGGATATGAGGAGGGATAATGATGATGCTGTTCCGAGGAAGGAGAAGGTTGTCACAACTAGGGGTGAAAATAGGCCA…
>Peanut_newGene_1007	Peanut_newGene_1007.1
GAAGAAGTTCAAAGGGGGAAGAATCTAAGAAGCAAAAATCTTCTTTATACTTAATGCTGGTTTGAGCTAACCAATGGGCGCATTTATTTGTTTCTCTTCCCACGTGATTGAAGGAGATCTCCTATGGCCTCCTAATCAAACTCAGGATTTCTCTTAAAACTTTACTATGACAAGTGGTTATTTTAGTGTGATCTTTCAACATCTCATAAACCTCCATTGCATCAACTTCAACAACCACTCTTCGCATTCCCAAGTCAGCAGCCATTCTCAAACCATGTAGAACCCCTTGCAGCTCTGCTTGGACCGCATTGCACATTCCCAAATTCACACGAAAACCTCCAATCCATTCTCCCTTACTCGATCTCAATAGTCCGTCGCAGCCCGCTTTGCTTGTCCATT…
>Peanut_newGene_1014	Peanut_newGene_1014.1
TTCATGAGTACCACATTAGCAAGCCATAACGGATATTTTACCTCCCTTATGAACCCATCTTCTAATCGTGTCTAGACTTGCTCTTCTACAACTTCTGCTCTTTCGAGACTGAACTTTTGTTATTTCTACTGGACAGGTCTTGAACCCGAGTAAACAACAAGCTTGTGGTCGGGATAGAATTCAGGCATGTTAGAGGCTTTTCAAACAAAGAGGTCGGAATTTTTTCATAGGAGCTTAACGAGTTCTTGTTTTAACTGCTCTTCTAGGTTAGCCCCTACGTTTGTTTCCCAACCTCGTCCCCAATATGAACCTCTTCAATTTTTCCTTCAAGTTAAGGTCTCAATTCCTCCTGAACTCGGATACCTTCGAGCTCTATGTTTTTATTCCCTCATGAGTAGA…
>Peanut_newGene_1019	Peanut_newGene_1019.1
TATACAAAAGATATCAAGGCTGAGTTTATTGATCCTCTGCGGAAAAGATGGTCAGGTTAACTTTCACGAATATGTTCTTAGTTGCCCTTCTGGTTTTAGCATTGACATCAGAAAGAGTAGTAAGCCTGAGAGAAGAAAAAGGGAAGTGGTGTCTTTATTCATGGATGGAAATAGGTTGCAAAGACGATGCATGTGACACAAAATGTAAGAACGCACACGGCCAAACAGCTAAAGGACACTGCTCCAGTTCCCATTGTGTATGCTCATACCTCTGTGATACTTGAATTCAATATCATCACATTTTTACTATATATGCATACGCATATATATTTAAATAAAGTTCTGTATGGAGATTGAATGAATATCTCCGGCGTTCATATATAAAATTGTCCGAAG
>Peanut_newGene_1025	Peanut_newGene_1025.2
CACAATCTGATCCACCAGCGATGCAATAATTATTTCATTTCCTTCAATATATAAACATATACAGCACGCAGCACTCTCAGATCTCTCATTTCCCAATCCACCAACGTAGCATAATTAATTAAGAAAGAGCAAGCATGGGGAGCAGTTATTTTGGAGAAGCTAATATTGAAAGAGGAGCAAGTGGTGGTTCTTCTTCTTGTTCTTCTTCATCTTCATCAAGGAAAGGGAAGAAGAAGAATAGCAACTCGGAGAAGCAGCCAAGGCAACCACAGAGAGGACTCGGTGTTGCTCAATTGGAGAAGATTAGGTTACATAGTCAAATGGCCTATGCTTATCATCATCGTCTCTCTTCATATCCATCATCATCTACTTTCAACAATATTAATGATGATCCAAGAG…
>Peanut_newGene_1032	Peanut_newGene_1032.1
CGCGTATGCAGAACCAGCAGAATTCCAAGCTCCAAGTTTCTTCATGATTCCTCACTCTAGCATGCTTTCCTCTTCAACTTTCCATGTCATTTTTACCCTATATAATCTGAAAGAATTGAATAACTTTCAATCCCACACGCGCAACTTTCTGAACATTCTCGTTGATACGAAGCGCATGGGGCTGTTGAAGGAGATTGTGAAGGAGTATGAGTTCGTGTACAACACACTCACAGATATAGAAATGGCTGTGGTGAGTTCAGTGGTGAAGCTTGAGTCGCAGCACTTAGCACAGATAGCAAAGCAAGTGCACAAGTTAACGGGGTTAATAAGAACGTTAGAATCAAGACAGTTATTGACCCGAACCTGGTGGCTGGATTTACCGTTAGTGTGCTGGAGATG…
>Peanut_newGene_1034	Peanut_newGene_1034.3
CCGAGGATTTCATTAATACAATGCCTATCAAGCCTGATGCAGTTCTTTGGAGGACCCTGATATGGGCCTGCAAACTTCATGGGGATACCGACAGAGCAGGGCGTCTCGTGAAACACCTCAAACTGCGAAGGAGAACTGCTGATGATGATAGTGGGAGTTACATACTCACTAGCAATGTTTATGCGTCTGCAGGGAAGTGGTGTAACAAAGCAGAGGTGAGAGAGTTGATGAACAGAAGGGGATTAACTAAGCCTCCAGGGTGTAGTAGGATTGAAGTTGATGGCACTGTATGTGAATTTTCTATGGGAGATTATAATCACCCTGAAGCAGAGAAAATATATGACAAATTGGATCAGATTGTAGATGAAATTAGAAAGGAAGGGTATAATCCGAGAGTAT…
>Peanut_newGene_1036	Peanut_newGene_1036.1
ACTAAAACCCTCCCCCAAGAACCTAGCTGCAAGTAGAACACGCCGTTTTTCCCTTCCTTCCATGAACCAAATAAACAGAAGCAAAAGGGAAAGGGAGACTGAGCTGCGGCGAGGAGGGGAGGAGGGAGCTCACTGCCGCCGTACTGTGTAGAGCTGCCACCATCGTTCCTCAGTTCTCCGTGCTCTGTCGACGCCACTGCGCCGCCGCCGAACCTACCACGCCTCACCGTCAGTCACCGCCATCACCCACTTTTTCTCCCTCATAACCTCACCCTCAGATTTCATAAACCCACACACATTGAACACACACACACACATGGTGGAGTAGAGATCGGGCAGAAAGAGGGAGAGCGCTCGCGAGGTGCTGCTGCTGAGGCCATTGCCGTACCCTCATCACCG…
>Peanut_newGene_1038	Peanut_newGene_1038.1
CTGGGACGTTGGGGTTGTTGTTCTTCTTGTTACTCCATCTCTCCTTCGGAAACACACAACATTTTCCTTCTCATTTCACTTCACTTCTCATTTTTATTTCGGATTTCTCTTTTCCCTGCCGTGTGTTTGTTTTCTTTTTATTTTCTGGGCGTTTCTTAACCACCATCCCTTGTGTGTGTGAGAGAGAGAAGAATTAAGTGGAGTGAGGAACAGTCTTTTCATGTGGACTGGCATTCACACACCTAACCTGATTTGCCTGCCCTCCTTTTTTGTCACTTCACTTCCCTTTTCCAGCATTACTTGATACAAGCTCAGTTAGTAGTTCATACCCTCTCTTGGTTTTTGAGGGGCCATTTTGCAAATAGTGTTTTGATTTGGAGTAAATGGCGATTTCGAGTG…
>Peanut_newGene_1040	Peanut_newGene_1040.2
GCCATCATCGTTCCCGTCGTGGAGTCATCGCCGTCACTTATGGCAGAGCCAGAGAGAGAGAGAGAGAGAGAGAGTTCAGGAGCAGAGTAGACAAGAGAGATATGAGGCTGAGTTGGGGGTCTAACCACCGCGCCCAGTCGCTGTTCGTGTCGCCGGCGTCGCTTCTGTCAGAACCGTCGCCGTCATTTCTAGCTTTCATCTCCATTGTGGTTAATTATGGATGAGAGCCGACGAAGCTGCCTCTACCGCGGGATAACGCTCTGCCGTTGATCCACCGGAGCTTTTAGCCACTACCGGAGCCGCTGTCGGGTCAGTTTGGGATTGCGGCTCGTCTGTTCTGCTGTTATCGGTTGAGTTTCGGAAATTGTACGATTAAAATAAGAGTCAATGCGGTGTCAT…
>Peanut_newGene_1044	Peanut_newGene_1044.3
CGGTATAACACGGCCGGGTTGAGTTAGAGTCTCACCCACCATCCACTCGTGACTCACTCATTCCCAACCGATTTTCGCATCCACTGCCACCGCCCGAACGATTCCAACGCCGGCCAACCGTCACCGTCTCCGGCAACTCTTTCGTCACCAGAAAACTTCGAGAATCGGTAGGTCCTCTCGGATCTAGATCGTTTTCGCCGTATTTCAAGGAAGGCTCTTACATTACTATGTCATAGTTTTGGTTTGTTATGTGCCTAATACTAGGCACTCGACCACTCATGCATATGTAACTGGAATTGTAACAGCTCAATTTTGGATATAATGCCTCCATTACGCTCCAGTGGATTTGTTGATCCCGGTTGGGATCATGGTATTGCCCAAGATGAGCGGAAAAAGAAG…
>Peanut_newGene_1054	Peanut_newGene_1054.1
CTCCAAGACCGGCTTCTCTCTCTGAACAAATACAAATTCATTCCTCCCTTTCCATATTCCCCAGCATAAAAGAGCAATATACTCCATCTTCCCTCTTCCGTCACTCCTTGTTCTAGCAGCTTCAAGTCTTCTACTCCACCACTCAGCAAAATTCGGTTGAACCAGCTCACGAACATCTAAGTTCATAGGGGGCAGTACCACGCTGGTGCCGATTCGGGACAGGACAGGAGGCAGTGCAAGATGGTTTCCTCAGCAACTTGGCATCTTGAACAAATTGGTGAGGGTGATTGGAATCTTCAGTGAATTAGTTCCACAACTGGTAACCTTTTGTGAATGGCTCGCCAAATAAAGAAGAGGACTTTTGAAGGTCCTTTACCCAATATAGATTTCGGTTGTGGT…
>Peanut_newGene_1058	Peanut_newGene_1058.3
CCACTCACGGCGTTACCACTCACTCATCCTCACCTCTAGGAAGACTCTGTACTCACTCATCTTCACCACCCACCATGCCGTCACTCATCTTCACCGTACCGTCGCTTCTCTTTGCTGTGTGCTCACATCAGGAAGACACTGCGCTTAACTGAAAGAATCTCTTCATTTGCTCACTATCGTCGAGAAGGTTCCTGTTGGCAGGGCAACTCTTGGACGTATTATCAATGTCATTGGGGAGCCTATTGATGAGAAGAGTGATCTAAGTAAGAACATAATAAAGCCTTTTCACACCTTAGTGATAGAGAAAATCTTTCATCCATTGTTTCCTTGGGATGTTTACAATTGATGGTTCTTTTGTGAACAATTGTAGAAACTGAGCATTACTTTCCCATTCACAGA…
>Peanut_newGene_1063	Peanut_newGene_1063.1
TTGCCAAAAATAAAAAAATATCATTGGATTAATTAATTTCTTTGCAATTTGTTTTGTTAAGGCATCTGGCCCACCACATCTTTTCTTAATATCTTCTGATTGGTGGCACCTTTATCTGATTTCTCCATAATTATTATCTCTGCCTACCTGACTGCCATTGATGGATGAGCTTGCTTGCTTTATGGACTGGGATCTGGAATCCATTGTGAGAGGGTGCCCATCAACTGCCACCACCATCATGGAGCACGATCCAAACCCTAATTTCCTCTTTCATCAACAAGATTATGACCTACTTTTCAGTACTAGTAGCCCTACCGTTACCAATAATCCCCAAAGAACCCGAAGATGCCATTAAACAAGACTTGCAGCAAGTTTCCACAGTTTCTAAACCTAAAAAAA…
>Peanut_newGene_1065	Peanut_newGene_1065.1
CCTTTAACTTTCCATTTTCCCCTTTCTCTACCTCCTAAGTTGCGGAACCTTCAAGCTGCCATTACCGCCGCTTCAAAGCGTTCGTGACCTACCATTCCAGTGATCTGACCGCCGCCACCTACCACTGCTCTCTTCTTTCTTTCTTTCTTTCTTCCTTCTTTTCTTCTCCTTATCTCTTTCCTTATCTCGACCGTTTTTTCTCCTCTGCCACCGTAAGCACTGCCGCGGCTCTCTCATTGCCGCCGGCGAGCATCATACCACTATCACCAACCTCTATTTCCCCTAGCTCGCTTTCCTTCCCCTTTGTCGCTGCAACCAGAGCAGAGCTTTACTTCTCTACTCTGCCTCTCGCTGCCCTGCGCTACCTTCTCGGTGCCACCGCGAGCCACTAGATCGTCT…
>Peanut_newGene_1068	Peanut_newGene_1068.1
AAGTCCTCGACCTCCCATTCGCGACTCTGTCTTCTCTCTTTTTTCGGTTCTCTTCTTCTTTCGTTGGTGGCTCACCAGAGCTCATGCTCATCAATTGAGGTAAGCCTCCTCCTTGCCCTTGTTCTGAGTTCTGAGTTTTATCTGGGTTTTTTCTATTTTGTTGATTTGTTTTGTTTTGTTCCTTCATGAGTATACTGACTTCTTCACTTTAATGGATTGAATGTGCAAATTTTAAAATCTCTCAGTATTGAACATTTGAACTCTCCATTTCAATGGATCCTGCTGTGATGTTCCTTGTGAAAATTCACTGTTAAGACAAGTGTCAAGTCTCCTGAGAAGATTGCCTGCTATTGAATCTGGGAAATTTCAAGATGATTTCTTAATGGTTTTGTTTACATG…
>Peanut_newGene_1070	Peanut_newGene_1070.1
CCGCCTCGCATCTGTCTCGCCGTTTTTCCATTTTGCCTTCCTTGTCATTTATGTTTGCCTCGCTGTTTCTGCTTTTCTCCTTCGTCCCTGCCATTCCTTACTCCTTCTTTCGTGCTGGTTTATGGCTGCTCAGTCTTCTCTGTTCATTGGTCACTGATTCTACTGGTATGTTGTGAAGAGAATACTAGAAATTTTGACTTGACCAGTACTCAACAGTAAGGGCAAAGGACAAGGATGGAATGTTAAAACATAAAGGAACATATGAAATAATATCTCCTGAGGATATTGGGTTTGAAAGGGCCAATGAAGCTGGTATTGTACTTGGCAAGCTTAGGACAATGATCAAAACAATTTCGTTCACAATGGATGATACATTAAGTTTTATATTTTGTAATGAAG…
>Peanut_newGene_1071	Peanut_newGene_1071.1
CCTAGCCACCCCCCAAACCCACACAGCAGCAGCAGCTGCTATTAGAATGAAACAAAAAGAAAGAAAGGATTAGGAGGAAAACGGGGAAGAAGGAGAGGGAAGAGAGGAGGAACGGCGCCAATGAGGAGCCCACTATCACCGCTGCCGCGTCATCGTTGGGTCTTGGAGGGAGGCCATGCCTTTGAGCTGTCACCGTCGATCCACCACAAGCCGCCATCGCAAGTCAGATTCAAGGTGAGAGAGAGAAAGCCGCGAGGAAGAAGGGAAGGAGAGAGAAAGGACCGTGCCGGCATCGTGCCTCACCGCCGCACCGCGTCCCACTATCGCCGCCATCACGTCTGGTCACTGTCGAGCTCGCCATTGAAGACGCCGCCTGTGCTGCCAACTCCACCGCGTTCT…
>Peanut_newGene_1075	Peanut_newGene_1075.4
CCTAACTCGAAAACATTGAACGAAGGAACCCCTCCCCAATAGAAGCTCTCACAACTCGCGCTCCAACGAGGGATCCTTAGCTCGCGCCGGACCTGGGTCTCCAGAAGCTCCGGGTCGCTCAAGTCTCTTCGCCAGTCTTCACAGCTTCCGGTCGAGATCAAGGCACCCTTTATCTTTAAAGATGGCTAAAAAAGGTCGTTTCACGAAAAAACCGAAAGAAGGACCAAGATGTCAGCAACCACAAATGGCTCTGCCTCCGGCCTCTGCTACCCACCGTGATGACTTCGAAATTCTCCCGAACAGTGGTGATAGTGTCCCTCCAACTTCACGCCCGTTCCTTCCGCCGCGCAGTGTACCAAGGCCTGCTCCGCAAACGAGCACAACTACCATTCAGAACTC…
>Peanut_newGene_1080	Peanut_newGene_1080.1
GCTTTTTCTGAAGTCTGAACATAACAAGCAAATACCTGGCCTGTCCTTCCATCTGTTGCTTAGTCACCTTCAAACTTTCCTGCCCTTTCTGTTGAGGACGAAAGCTGGGGTGGTAATGGTGGTGGCCAAGGTAGAAATGGTGAATATGAGCTTAGACAATAGGCTTTAGATTTTGCGGTATTGGCTTCTCTTCCCTGCAAAACTGAAGAGGAGAGCGTGGCCAGAGATAGAAAAGTTTTTCTGCTGCACAGTCGATTTGTTGATACCTCGATATTCATGGCCATCGAGGCAATACAGCATGTCATGGAATCCAATATAAAGAATGAATCAAATTCTCCATGTTTAATTCTGCATAAAGAGCGCGTAGGAGGATTGTCAATTGTTGTTAAATGCGATATT…
>Peanut_newGene_1082	Peanut_newGene_1082.1
GTAACATGTCTCCTTTTTCATCATTCTTTCTAGAGCCAACATTCATGAACCACAAATTCAAAAGACACACTACAAAAAAATGGGTATAAAATGGCATCAACATAATGGCGGTTTAATAAAACCGCCGTTATATTCATAACTTCAGGCGGTTTATGCAGCTGCCATAATTTACTCATAGAAAGCGGTAGTGTTTTGGTGATTTTGGCGGATTTAAACGCCATTACCTGCTCTTGCTTCACTGATATAAAAACACTTTTATTTCACTAATAAACATGGTGCTATTCAATCGAACTTCCATCGCAATGTGAGAACTAAGAAGAAACTCCATCGCAGCATGAGATCTGCGATTTCATCCACAACGCTCTCCTCTGGCGGCAATGTCGTTGTTGCTACCTTCGA…
>Peanut_newGene_1085	Peanut_newGene_1085.1
AAAAATTTCTTTCGTCTTTTCACTTTTCGTTCCCCGCTCCTTCCTCCCCTTCCCTCTGTTGTGACCTCTTCCGTTCTATTATGCCTATCAGGTGCTTTGCCCAGATCGGGTACGAAAAACAAAGACGACACATTAAAAGAAGTGCGTGCCGATACACATCGCTAGTAGCATTGGAAGCATCATCTCTTAGTGCTTTCCTTCGGTCGTGGAACAAAAGAGCGTTCTCTGTAGAGGTCCGGTTGAATAATCCGGCAAGGCGAGCTCAAGACGAGAAAGTAAAGAATAAGAATGTTTCAACTATTGTGTGTCACGACAACTCTACACTTAGTAAGGGAGTTGTCTTGGATTTGTAATTTTTGAAGAGCAACATGTCACCTTGAACAGGCCGTGTGATGGAAT…
>Peanut_newGene_1087	Peanut_newGene_1087.1
CTTCTAATAAAAAATTGTTTCTGGTTTCAAAAACCTTCTTTATCTTCTCAAGTTCTTCCCTCATCTTTGTATCTCTGATCTCCATCACCCTCGAGCTCCTCCTTCCTCTCTCCGTCATCGATCTCACTCCTTCACCTCAGTCCATCTCCCGCCGCCGTTGCCGAAACGAGCTTCGAAGCCACCGTCGTTATCGTACAGCTCTGTTCCACCATCGTGCAGCTACTGTTTCAGCTTTGAAAGCACTCGCGCAGCTCGGTTCCATCATCGCTGGGCTCGCCTCCTTTTTCCGTCGCGCAGCTCTGTTCCATCGTCGCCGGCGCTAACTCTGTTCCACCTGTCATCCCTTCGGTCGTGCCCTTGTCCCCCTCTTGCTCAGGATCTGCTCTGCTCTGTTCTATG…
>Peanut_newGene_1090	Peanut_newGene_1090.2
TGCGAATGAGATAATCAGTGTGACGTGTGAACGTGATGAACCTAACCCTAGTTTTCTGCCGCCGTTCATCTTCTCACCACCGCTCAGCTCCAAGTTGTCGTAAGCAATGTTATCATTGTTGTTGCCTTTGGTGGAGGTTCTAGATCTGCTTCTCTATCTTCGATTTGAGGTTTTATCGTCGTCGTTCATCTCTGCCGTCATTCATTTGCTCGGCACCGCTCAGCTCCAAGTTGCCGCAAGCAACGTTATCGTTGTTGCTGCCTTTGGCGGAGGTTCTAGATCTGCTTTTCTGGCTTCGATTTGAGGGGTATGCTTTCTGTTCACAACCGTTTATCACCTCCTCGCTGCGGCAAGTGATGCAGCTGTTGCTCTCTCTGGTGGAGTTTCTGAGATCTAGTC…
>Peanut_newGene_1092	Peanut_newGene_1092.2
TAAATCCTCGACAAATATTGAGTATGGAAAAAATAGGGTATAAAGATGAAGTGATTGCAAAATATTTTGTAAATAACGTGTCAACTTTTAAATTGTTTTCTGTTGCTAATTTGCTTGAGTGGGATACGGATAGAGATGTTGTAGTCAACTATAAAGATAACTAGTATAGAAAGTGATTTTTTTTGAAATACTTTGGTTATTTAAAGTTGATGATATATGGTATTGTGTTCTGTAAGAGAGAAGGCATCAAAGGTCACTGCCAGTAGCCTTTAGTCATTTTTTAGGGTAAAAATATGGAGAAAGAAGAATCTACCAACAATGTGAAGGTGGAAGGAGGGCTGAGGTGGATTAATCGATACCTCAGAAGAGAGTTGTGAGTATTAAGAAAAGGAAGATTGA…
>Peanut_newGene_1097	Peanut_newGene_1097.1
CCGATCTCCCTCTTCTCTGCTCGTCCCTCCATCCCTCCAGGGTCCAAGTATGTATTTTTAATTTTTTTAATTTTTTGAAGTTAATTTTCAATAATTTAGTACTGATAGTTAGAATTAATTGATTATTGTAGATTGATTATGTATGTTGGTTTCTGTTTGATTTCTGTTAGAATTTAGATTGTTGATTGTTCAATTTTTTGTAACATATTGTTGTTATATATGGCAGATGAGAACATGAATACTTTCACATATGTTTTTCTGTTTAATCTCTCTTGTTTGTTGATTTACTTTTTATTTCTGTTCAGTTTGTTGATTATCCATTGTTGTTAAATTGTTGATTGTTGATTATCTGTTATAGTGTTATATATGTTGGTTGCTATTGTATATTATTCTTAGTAG…
>Peanut_newGene_1104	Peanut_newGene_1104.2
TGGAGAGAGAACTACAGAGTTCTAATAGAACGGGGAACTAAAACCCCTCTACAATCATCATCCAAGATAATTCTTAAACTAGTTTAGGACAGATCTATAAAGTGATATCCCATCTCCTGCTCCAGATCTTTCCTGGCTAACCAATCAGCTGCCTTGTTTCCTTCCCTGAAAACGTGTAGGATTCTCACTTGCCAATCTTTGCTTAGCCAAAACTTAATATTCCTTATGAGACTGTTGAAATGAGAAGACTTTTCATTTTTCCTCCCAATACTATCAATTACTGCCTTTGAATCAGACTCCAATATAACTCTCCTGCAGCCTAACTCCCAAATAGTTTGAAGCCCATGGAGCACCACCGATAATTCCGCCTGAAAAGCTGTATAATTTCCTAAGTTTGCA…
>Peanut_newGene_1106	Peanut_newGene_1106.1
GGGTTTAGTTTTAGTTTTATGAGATAGTGCTTGTTGTTTTGATTTCAGCTGCAAAAGAAGAAAAAGGCGGGGGGTGTGATTAGTCCTAGATGGGTTCAAATCTTGAACTGGTTCAAATTACACCCCAGAAACATGACCCTGCATGGAAGCATGTTCAGATGTTTAAGTGTGGGGACAAGGTTCAACTGAAGTGCATATATTGCCTCAAGATGTTCAAGGGTGGTGGTATTCATAGGATTAAGGAACATCTTGCTTGTCAGAAGGGCAATGCATCCACCTGCAGCCGTGTTCCCCATGATGTTAGGCTACATATGCAGCAGAGTTTGGATGGGGTTGTCATGAGGAAGAGGAAGAAGCAGAAGATCGAGGAAGAGATCATGAATCTTACTCCTTTGGATA…
>Peanut_newGene_1115	Peanut_newGene_1115.1
TATTAAATCCCTATATAAATAAGGGAGGAGTGGTTCTATTGTTAGGCTTGAAGAGAAAGCGCGGCCACACCACCAAGATGGGCGGCGACAACCTCAAGTTCCTCTGCAGCTACGACGGTAAAATCCTCCCCCGCTATCCCGACGGCAAGCTCCGCTACCTGGGCGGCCACACCCGCCTCCTCTCCCTCCCTCGCTCCACTGCCTTCTCCGAGCTGCTTGTGAAGCTGGGAGACCTGTGCGGTTCCCCCGTCACTCACCTCCGCTGCCAACTACCTACGGAGGACCTCGACGCCTTGGTCTCCATCACTTCCGATGAGGATCTCGCTAACCTTCTCGAGGAATACGACCGCGTTTCATCTTCCAAGATCAGGCTCTTCCTTTCCTATTCATCCCCCGCCA…
>Peanut_newGene_1118	Peanut_newGene_1118.3
GTGAGTGTCGAGTCCTCAGGTAGCTGAGAAATGATGATCATTTCCTGCAATTAAGCAAGTGCAAGGATTTTATGTGCATGTTCATTGTTTGTCAAAATGTCTGAGTTGGGTTGAACACCTAAATAAGCAAGATTCCAACTTCATATCAAGCTGTACACATAGTTGCAATATCCAAATACTGAGAGTCACAAGCCACGTATTCTAGAATGTACTGGGTTAACTTCCAAATCTGTCATAGTAGTGATGCTATCGAGATCCCCAAAATCCTACCTTTACCTTCTTCCTCTTCTTGTTCTTGTTCTTCCCCTTACAAGAAACAATTAGAATGAACCCTGCAGTGATTTTCATCATAGTGATCTTAGCTATTGTGTTCTTGATCTCTGGTATCATTCAATTGGT…
>Peanut_newGene_1120	Peanut_newGene_1120.2
ATTGTTTTGTCATTATAACCAACCAACACCATATATTAATATCAACTTTTGCAGCATATAAGTTTTCTTTATTCATCATTATTGCCAAATCATTGCAATATCATGGAATCTTCATTGACTCTAGCCACTGAGAGCTTCTCATATAGTTGGTTATCATCATCAGCCTGCAAATCTACTACTACAACACCATTAGACCCAAATTGCCACAACTTCAACTTTGATATCTCTTTTTTAACTAATCCATCACCTAATTCTTCTTCTTGTGTTGTTGCTTATGCTGATGAACTCTTCTCTGCTGGTACCATCAAACCTCTGTTTGTTCTTCACCCTAATAACACCAAACTAGTAGATTCCTTGGACAAAACCATTAATAAGCCTACTACTTCTTCATCTTCCAAT…
>Peanut_newGene_1123	Peanut_newGene_1123.1
CTACATCACTGAGCACAGTGTTTGATAGAAGGCATGCTTAGCTGATCTTGTTCTGTTTTTGTTTTGGTGCATCAACCAAATCAGATTCATTGATTGGTTGTTGAATAATTATTGATCAGAATCAGAATAATTGAGATTGGTATGATGATGGAGGAGAGGAAGAAGTTTGTGTGCAAGTATTGCAGCAAGAGGTTTCCATGTGGCAAGTCTCTTGGTGGTCACATCAGGACCCACATCACTGAAGAAAGAACCACCATCAATGCTTCTTCTTCTCCCATTGCTGCTAACACTCATGATCTTCTTCTCAAGAAGAGGAAGAGGGATTCATCATGGCCTACTCAATCTGCTGCTGTTGGTGGTGGTGCTGCTGCTGGTAACAATAATAATAGCCCCATTTAT…
>Peanut_newGene_1133	Peanut_newGene_1133.2
AAGCAAACAGAGGAAAGGTTGCAGAAAGCCCTATCCAGGGTGAAGTCAATGGTTCAGTATCCAGAGGCAAGAGACCAATACCATAGGCTGTTGAATGTTGTAACTGAGATCCAAGAAAACCAGCTAAAACATCATAGGAGTTCAGAAGAGAGAAGAGAATTTGATAACCTCATTGATCTTGAAACTTTGCTGGACGAGGATACTTTCATGCTTACAGTCATTTAGAATTTAGCATACGTTCCATTGTTTTATGTAATAGAATGAGCATTGCACCTAGGAGTCTGGCATGTGTTGCCTTAGTTTTGATGTTTTTTTTTTTTTCTTTTTTAATAATACTAATTGTTCCCTGCTTCCCTTGTATAGCAGATAATTGCTGAAATGCGATGTTATAGGTTCAAA…
>Peanut_newGene_1135	Peanut_newGene_1135.4
AAAAAACATCATTACATTCTCTCTCCGCGTTAAACCTTGATTTGAACTTTCCAACATTACATTACACATTACACATTCATTCATCATTTGTACTACAACATCTCTATCTCCTTTTGTTTAGATTTTTGGGAAAAAAATAAAAAATAAAAAAATACGTAGCCTTGTCTAGTCTGAATGTTTTTTCCGCCCAAAATCTCAAAGACAACTCTGCTTTGCTGCTTACAGTTCTACAAAACTGCAGTTGAATCTAACTCAGCCCAAGTGACTGTGACTTGGATTCCATTTCCATGGCTGACGTCAAGTGCTATGTTCCCCCTAATCAATTTAGTAAGCGTTCTTTGACCCTCTTTTTGCGGATTATCTCTTGCATGCTTTCTTCATTCTAGTTGATTTCCAAAA…
>Peanut_newGene_1141	Peanut_newGene_1141.1
GAGTCACAGTTTTTCTGTGTTCCATTCCATGCATCGCGCCACTGTCACTATCGTTTCGCAATTTCGTTTCCATTTTCCCGCGAATGTACGGCCACCTACACCGTTCCCGCCGTGGCGATGGGGGAAACTCCCCCCGATAACCGACGCCGAAGCCACATCAGAACCCATTCCAAAACCCTAAGGTGTTTGTTTCATCTGTACGATTGCAACCTTCCAAATCGCAAATGGCGCTCCCGCATGGCTTGGCTTCCCGGAAGTTTTCGATGCGGAAGGTTTCGCAGAATGCTCTCGTGGCACATACAGGCTAATTCTTGAAACACTTTCGGCATTAGTGTTTTTTTTAGTTAAAAGAGTTTGAAATTACAAAGTAGTTAGGGTTCAAATATGATTTTCAATGTC…
>Peanut_newGene_1145	Peanut_newGene_1145.3
GCTGGTACCAATTACCATAATTGTTAACTGACGTCGCAAATGTAATTTTTTTTTATCAATTTAGTCCCTTGATCCCTTTTAAAAACCCTAATTCTAAAACATTTTCAGCTCTTCTTCTCCTCTTCTCTCCTAATTCCTGGCCGAGCTTCGCACGGGGGGACCTCTTCTCTCCTCTTTTTGGTCTCGTCCCAATCTTGCCTGGTTGAAGCTCAACAACTACGACAATGTTTTCTTGGCGGAGGATAGAGCTGGATTTGGGTGTGTCTTGCGTGATTCTTCTAATCGGTGAGTGCGTGGCGGAGTAGGGATTTCTGTATATTAACAAAAAAAAGGTTTGTAAAAGGGATCAAGGGAGTAAAGAGGGAAGAGTGGGTCGAAGAGCACGGCGAGGTTGGAGTT…
>Peanut_newGene_1147	Peanut_newGene_1147.1
GAAGAAGAAGATTGTTTGACTTGAAAGAATGGAAGCAACATCTATTCTTGTGCCTTGTGTGCAAGAGCTAGCAAAAGAGCCATTGACCACTGTTCCACATCAATATATTCGTCCAGATCAAGACCCTCCGCTATTATCTACCACCATTAGTGAGCCTTTGCCTCAAGTTCCAGTGATTGACCTCTCCAAATTGTTGTCCCAAGATCTCAAGCAATCTGAGCTGCAGAAACTGCTTCATGCCTGCAAAGAATGGGGCTTCTTTCAGTTGGTTAATCATGGAGTGAGCACTTCATTGGTGAAAAATGTGAAAACTGGTGCTAAACAATTCTTTGATCTTCCAATGGAAGACAAGAACAAGTTGTGGCAGACAGAAGGAGATATACAGGGATTTGGTCAGTC…
>Peanut_newGene_1149	Peanut_newGene_1149.1
TGTGTTTTTTCCCACTGCTTTCCCCTTTTTTCACACCGCCTTTTCATTTGCGTGGTTTGGGATCTCATGGAGCTCCAGTCTTAGCTTGCCCAACTAATTTTTGTTGTGCCTGCTTCTTGGCATGTTGAGGATTTTGCAAGTTTTTCTTTCTTTATTTGAATTTTGAAACTGTTGTTATGAATTGTATGAGTGATTGTGTATAATCAGTTTCGTAAAGAAAAGGGAAGGGTTGTGCCTACTAAAGTGATAGTATTATGGTAAGATAACCACAGTGATTCGGTGAGGAATTTGCTCTGTTTAATTGCTTTCCCCGAAAGAAGTTAGCTGTTAGTAGAACCATGATGACTCCAAATTTGAACTTGGAACCTGAAAATTACTCAGAAGGCAGCAGCCAAGTAG…
>Peanut_newGene_1152	Peanut_newGene_1152.1
GGAGAGATAGAGAAGAGAACTCGTTGGGAGAGGAAGGAAAAGTTGAAGGAGAAAGGAAAGGAAAGGAAAGGAAAGGAAAGGAAAAGAAAGGAAAGGAAAGGTAAGGGCCAACTCGTTGGAAGAGGAAGAAAACGTTGAAGGAAAAAGAAAGGAAAGGAAAGAAAAGGAAAGGAAAGGTTAGGTATGGGCCACAGTGCAAGAAGTCACTACGCCATAGCCACCGCAGGTTAAGGAGAAGGACAGATTGACAGAGAGGAGAGTAGAGAGAAAATGGTGTTGTTTTCCTGACAGTTGAACTCTCTGTTTTGCCTTTTCTTGAGGGAGAAGTTGCTGGGAGGAGAATCGGGAGAGAAAGAAGATACAGTGGATTCCAGTTAAGATGAGAAGTTGAGTAGGATA…
>Peanut_newGene_1156	Peanut_newGene_1156.2
TCTTAGTGCAATTGTCTTTGTTCTGTTTAACTGATCTGAACTTATGGATTGGCAAGGACAAAAGCTAGCAGAGCAGCTGATGCAGATATTGCTGCTTGCCTTTGCTGTGGTTGCATTCATAACTGGATACTTTACGGCTTCTTTCCAATTGATGATCCTCACATATTTTGGTGGTGTGATTCTCACTACATTGGTGACCGTCCCTAATTGGCCCTTCTACAATCGCCATCCTCTCAAGTGGTTGGACTCGAGCGAGGTAGAAAAGCATCCGAAGCCACAGCCGTCGGCAAACTCAACTTCGAAGAAGAAACCTGTTAAGAAGTAAGACTTGGAATAATAAGAAAATATCACTTATTGTGGTACTAGAAATACATGATTTTAAAGTTTAATTTGTTTATA…
>Peanut_newGene_1157	Peanut_newGene_1157.1
ATGAGTGTTGTTATAGTTGTGCAGTTTGCAAGGCCAAGAGGTTCTAAGCTCAGCTTAGAAGGTATAGATATATTCTTCTCTGTTACTTTTGTTTAGGATTTGAAGTAGATCTTACCATAAGCAATTTATGTATTTATCCGTTTGAATTTATGAACCTGATGAAAAAGCAGTGGCCTGTTGCCTCTGTGAACAGGCCGCTCGTTACCTTCAGGGATATATGAATCCAAAGTTATTGGGTGAACCTCTGTTCTTTCTTTATGACTCAAGGTTCAGTAAACCATGGGACATTTTTTTTTTTAAATATTGGAGTGAGAAACCTGATGAAAAAAGCAGGGGTCTGTTGCCTATGTGAGCAGTCCTCTCGTAACCGTCAGGGATATAATTATCATTGTTATTGGG…
>Peanut_newGene_734	Peanut_newGene_734.3
TGCCTTAGGAGTCGTGTTTAACCGAAGCACGACGCTGTGTTTGCTTTTGATTTTACCTGCTTAGTGTTTCGGTGGAATAACTGCTGTGTTTTCAAACTTTGGTTCGGGTTGTGGATCTCTTGGTAATGTGAAGGCCGATGAGGTTTTCGAAGACACCGTTGCTGTTGTTGCTTGAGCTTTGAGAAGTTCTTCATCGCTTAAGATATGATGAGGAGGCAATATTCTTTGATGAATCTATTTTAGAAATGTAAAACGAAAGCAATTGGAGTCGAAGGCATTGGATTTTATACTCACCAAATAAAGGAATGCAAGGAAAATTTTATAAATGAAGTTCATCAGAATTTGAAGATTGCAAATCTTTTGGATTGCACTTCATGGTCAGGGATGGACCAAGGCTAA…
>Peanut_newGene_754	Peanut_newGene_754.1
CATGTCTATGTTAATCTATATCAGTGTCCTATAGGGTGAGATTCATCATCAATTCAAGCGAGATGTGATTAACTGGAAGACATGTTCACTGCAGGGAATTGTGAGACCTCCCATGGGATGATCATATCCAAACTCTTCCTCAGCTTGACTCAACAAGTCTTGGAATGCAGGTTGGTTCAAATATGAAATGGGAATCACAAAACGCTTCTGGTTCTCTCCGACATACACTGCAAGATACCCCTTTGGGACTTCTACAGATTTTGAAGCTGCTTGCCTAGCAGAGAATGATGCCTTTCGGATGACAGGAAAACGGAAACCCATCTTTCTATGTATGTAAGAAAAAGCAAGAGCTCTAGAGATGATAAGAAGAATGTGTTCAGCAATCCTTCAGAACAATAT…
>Peanut_newGene_760	Peanut_newGene_760.1
TGAAAATCCGAATCAACAAAACCTCTCTCTCTCTCTCTCTCTGCCCCTCTAGGTTTCCAGTTTTGTAACCATGACTCTCTCTAGCTTCGCTCACACTACTACATCTTCTCAACCACGCCGGAAAACAAGCCTTAGAAAACGGTGTTTTACGATGGTGAAGCAACAGAAGACGCGGTTCTACATATGTGGAAGATGCATAGCTATGCTTCTCTGCTGGCACGACCACTCTATATCCGATTAGACTGCATCTATACATATATGATTGTGTTCTTGCTTTCGTCTCTACTGTCTCGTGGCATGGTACTATGTAGCTTGTGTTCTGTGTTTTGAAGAGTTACCAAACAGGAGGGTCAGTGTATATATGATGAGGCTGCAGCAGAGGAATCTCAAGTCACAAGG…
>Peanut_newGene_764	Peanut_newGene_764.2
GCGCCGATCTACTAACGCGTGAGGGCGTGTTCGTTGTGGAAGGCGATATCAACGATTCATCGCTCTTGAAATCGCTCTTCAAGCTCGTGAAGTTCACGCACGTGATGCACCTCGCGGCACAAGCCGGAGTTCGTTACGCCATGAAGAACCCTTCCTCTTACATCCACAGCAACATCGCAGGCTTCGTGAACCTTCTAGAAACTTGCAAGAGCGTGAACCCTCAACCCGCTATAGTCTGGGCTTCTTCAAGCTCCGTTTACGGCCTCAACTCGAAGGTTCCATTCTCCGAGAAAGATCGTACGGACCAACCCGCAAGCTTATACGCCGCAACGAAGAAAGCAGGTGAAGAAATCGCGCACACTTATAACCATATCTATGGACTTTCCATGACAGGCTTGA…
>Peanut_newGene_766	Peanut_newGene_766.2
ATTAGATGGTCCATAAATGGAAATGAAGAACATGAAGAGACCAGGCAAGATTAAAGCGAACAGTGTAGCACTCTAGCGTCCGCTTTTGCGTAACATCACCGAACACAGATTAAACAAAAACCTAGAGTTCCTGTTTGTATTCATTCTAATCTCATTTTTATTGTAATAAAAATTTATGTTGCATGCTTAATGTGTGTGGATTTACCGATTTAGTGTTAAAAAGGGCTAAAATTAGTAGGTGCAGAATATATGTTGAAAACAAAAAGGCCACCACCCTCTTCAATTTCAATTCCGTTACTCCAACCTCAGGGAACACCACCAACAACAACACATCATTGACTTAAAACCTAGAATCCTTCCTTATTCATTAACTTACCAGCAACACAGCAACTCCTGAGG…
>Peanut_newGene_772	Peanut_newGene_772.1
TAGCCAACCAACCACAAACTGTGAAGTGTGAAGAGTTTCCACTTTCCATTTCAAGAATATAACACTTATGGGGGCTATAAAATCAGCCATGGGAGATGCAATCTTAACATCAGTATGGGTCTTCAGCCTCTCATCACAAAGGATTATCTCATCAGAGATATCTTCCTTTCTTGGATTCAAACCATTCACACTTCCATCACTATTCCTCTCAACAATCATAAACTCCATCATAGTCTTCACCATAACCTCCATTGGAAGGCTCTTAGGTGGTGCAAGCTTCAACCCTTCATCCACAGTTTCATCCTACTTCTTAGGCCTAAGGCCAGATTCATCACTCTCATCATTGGCCATAAGGTTCCCTGCTCAAGCACTTGGTGGGGCCCTTGGTGCAAAAGGGTT…
>Peanut_newGene_773	Peanut_newGene_773.1
CTAACTCTTCCTCCAAAATGTATGGTATATAAACATAGATATAGATCTCAAGTGAGAAAGGTGCAACATGCTTATATAGCTTCTTTCTCTCTTTGTTATTGTTGTTATGGTGCTCTTTTGCTTCTTTCCCTCTCTCATGGTATGGTCAATAATGAAAGAGGAGCAAGCTCTATATAACAAGGGTCATGCCTCATGAGATAGTGGTGGTGACGATGGAAAAGTAGTGCTAATTGTGAAACACAAAACAAGGTATTGACGTGCCTCAATTTGAAGACATACTTGAGACGAGATAATCAATTATGTAATTTAATTGAGCCGCGTCAATATCTCATTTTGCACTTCTTTCCATCTTCGCCTACTCACTAATTTTTCAATTTCTGGTGCTGGTTATTACACTGG…
>Peanut_newGene_778	Peanut_newGene_778.2
TCGCCGTGCTCCTCGTGTCGTCCTCCTCCGCAGTGGGTTGCCTTCACTGCTGTGCTTCGGCGTGAGCTCGCTTCTCTGCGTGCCGTCAGCTGTGAGCCCGTGGCTTCTCTTCTCTGTTGAGCAAAGACCTATTCGCCTCCTCCTCGCCTCCCAATCCTTCATAAAGTTTGAGAGCGTAGTTTTTACACACCCCAAATTCTTCGCAGTGAAGAATGGATATATGCAGCAGAACACAAACCTGGTGGAAGCCATTGTCCTGAAAGTAAAGGATTGCCTCCGCATTGGCGAGTCCCACCTCAAATCCGAGCTTATCTGCCACACCAAGAAGCTCTCCGACAGCCACTTCTACAACCTCGGTAAGGTCATCATATATTTGGAGAGAGAGGAGAGAGGGAATGA…
>Peanut_newGene_779	Peanut_newGene_779.3
GGAAAACGTAACGAAGAAGTCTGCTGTGGACACCGTTCAGCGTTCTTTTTTCCCTATCAAGAGCTTTGATTCCGTGTCCATGGCGAACGATCGCAAAACCCTAGCTGACGCGATCTTCGAATCAGTGCTTTCACGTGCAAAACAAGGAGCAGAGAATCCAAGTAGCAGCTGCTATTGCTGCTCTGGCTCTTGATCTCGATTTTTTCAAGGCCTCGAATCAAATCTGCGGTGGCGCATAGGAGGCGAACAATTGCTCTGCATCAGTAACAGAGTTAGCCTTCATAACTGCTTCTTGCGCCTTCTGGTCACGAAACAGATAGCACACGCTCCACAGAGTCGTCACGGCGTGCCCCGCCGCTGCCCTCGAGACCTTCATCGCCTTGCTCAGTATCGCCGCCA…
>Peanut_newGene_786	Peanut_newGene_786.1
CCTAAACCCCTCCCCTTTTCCCTTTAACCTAACACATACACAACACAGAAAACAGAAAGGAAAGAGAGAGGGCTCCAGGGAGAGCTGCGCCAGGAGAAGGAAGAGAGGAGAATCGGGGATGTCGCCAACGGAAAAGGGGATTGCTGCCACCGTTGCCGTCGAGGGGGAGAGAGTTGCTGTCGCGTTTGTTGCATCATCGCCATCGTGGAGCCGCGAAGAGGCCATCACCGGTGCGAGCTCGCGGAGGGAGAGAGAAACCCGCGAATTCGCTGCTGAGTCGCCGTTGGTGCGAGGAACAGAAGACGCGACAGGGGTTTGAGGCGGCGCCGTTAGCGTCACAGTCACCGTCGTTCCGTTCTGTCACTGTCACCATTGACGCTCGCCGGAGAAGGAGCCACT…
>Peanut_newGene_793	Peanut_newGene_793.4
AGAAAGGACAAGAGCATATCTATCCTTTTCCATGTGAGCACAAATAATACTATTTTGTTCTCCCAGAAGATGTTTCGTTTTACGCCTTATAGATTTTTCTATAAAACTCTCTAGACCCTTTCTAACAATTATAAGAAAATCCTAGTAGAGGAACCTTTTCCTCCTTTGAGGCAGTGGTGAGTGTACAAAGTTGAAGGGATGTGCTCACAAGGTTGTTGACGGAGCCTCTCACGATGAAGTTGATGGAACTTAGACGGCGCTACTGACGAAGTTTGGATGGTTATTGTTGATATCACTAAGTGTAGAGGTTATATATCAGTTTGGATGCTCCAAAAAAAAGTTTAAGGAGGGATGTAGACCATTGATTAAATTGGAAGGCTGCTTCTTGAAAAGCTAGTA…
>Peanut_newGene_796	Peanut_newGene_796.2
CTGAAAATTTAAGCAAAAGCTATTATTCATTCTTGGATCATATGATTCTTTTATATTTTTTGCAGTTAGGGTGCAAAAATCGTTTTTTTTTCTTTTAAATTTTAATTTTCAAGTGTAAGAATTGCAATAATTGTTCTTGGGGAAATCGAGAGGATGTTTACGAGCATTTAGTTTGTGATGGGTTTGATAAGGGATATAATAAGTGGATATTTCATGGAGAATGCGGGTCTTCAAAATCTGCTGAGAAGGATGGATCTGAAATACAAGATAACTTGGATAAATTGTTGGAAGAGACCTTCATAATGTCGAGGCAATTTGAAACGAGTCAATTTGATGACGCATTGGATGAGGATGAAAATGAAGAAGAGCTTGATGAAGAAACTAAGAAGTTTTACAAGT…
>Peanut_newGene_801	Peanut_newGene_801.1
CAGCAGCAGAACTACGTGCGGAGGTCTTGGTGTGTGCTAGAGGTAGCAGGAGAGGTTTGTTGACGTGGTGAAGGAGGTGTGGTATCAATGAAGATGGTGGTGTTGGTAGCTCGGGAGTTTTGAGGGTGAGATTAATAACCTCCTCTCTTAGTGATAATCTTTTTTTAGGTATTGTGAGGCAGCACAAGGGTATAAGAATGTGTGCGTGAGAACTAGAGTGATCAATGTTGAGTAAAGAGTAATTATGAGAATGCTTGTGGGAGGCAAAGGGTTTTTATGTTTTTTAAAACGGATGCAATACATATGAATATCTTTTTTAAATATGGAAAGATTTTGAAATGAATTTGAAAAAGAAATTTTAGGAAGAATTTTGGAATAAATGGAATGATATCTGCAAAA…
>Peanut_newGene_806	Peanut_newGene_806.1
CTCAGCGCAGCCACAACACAAGTCACACCCTCACAAGTCACAACCTCCATCTTTCTCTTCTATGCCTGATTGCCTGAGACGCTGAGAGAATGAGAGCTTGAGAGAGCTAGAGAGCCAAAGAGCTGAGAGCGCCGTCGTCGAGTCGCCGTGAAGGACGTCGTCGATCTCCATCACGGGCGTTGAAGAGAGCTGTCTTCACGCCATCGTCTTGCCGTCGTCGATCTCGGTCTGAGCCGTTCTTCCGTCCAGTAGTCCTCATCGCCGTCCAGCAGTAAGCAGTCCTCGTCGCCGAGCCTTCTTCTGCAACTCACAATGTCGTCTTCTGAGAAATTGCACCAACCGGAGAAGATGATGAGTCTGGTGTGGATTCAGGTTAAGCATGGTGGCTCTTTGGTTTTT…
>Peanut_newGene_809	Peanut_newGene_809.3
GGGTAAAGGGAAATATCTTTTCTTTTCTTTTTTTTTATTTGTAAGAAACGATTAAGAGATCTTAATGAATAGAGGAGGTGGTGTGGTTGAGCAAATGATGGGTTCCGGGAACCCTAACTGCTGGAACTCTCCTTCTTCTGATTTCTTGTCATACTCCTCCACTACTAATACTCCTTCTTCATACACCAACTTTCTTCTGAATCCACCACCACCATATGTACCTCATCCTCCCACTTCTTACTGGCATGAACATGAGCATGAGCATCACAATAATACTAATCCAGAGCTTCCCGGCGACTCATGGACTCACCTAATCATGTATGTAATCAACTCTCTCGATTTCTTGCATGCATGATCCNNNNNNNNNNNNNGGAGTGGTGGGAGAAGAAGAGAATGGTA…
>Peanut_newGene_817	Peanut_newGene_817.2
CACCACACACATAACCAATACAAGCGTATACACAGACACAGGCATAGAAAAAGACCCGAGAAAGTGAGGGAGTCGCGGGGAAGAAGAAGGAAAGGAAAGGGGGGAGGCCGCGCCGCCACTGGCGATCGTCGTGCAACCTCCGTTGCGCTTTACCGTCGATCACTGCTGCTGAATCGCCATCAGAAACGGAACCGTGGAGAAAGGGCTGTCAAGACACGAAGAGAGAGAGTCCGCGAGAAGAGGGAGGGCGTCCACGTCCTGTCGCTGCCGCTAGAGCGAGGCCGTTCGCGTCCAGCTCGCCACGGCTGTTGCATCGCCATCATTGCACGCAGTCGTCGAGCCCGAAGCTGCCGCCATCGCACGAAGCAGAGAGAGTGAAAGACGCGATGGAGGGGTGAG…
>Peanut_newGene_819	Peanut_newGene_819.1
CGTCAGCACAGCATCGCCGATCTCGCGCGATTGCGGCACCGCCACCAATCGCATCCCTCCTCCCCTCGTGGTTCGTAAATCACCTTCGCAACCCTCCTCCCCTCGTGGTTCGCAAATCACCTTCGCAGCCCTCCTCCCGCAACCCCACCAATACAACATCGCTCCCAAGATGTTCCTGCTGCGCTGAAGCAAAAAGTGCATGAGGTGCTTAGCCTACAGATGCTGAGGATAAAAGATATGATGGAACAACCAAGAGACGTGGAAGGATAATGCTAAATTTGTGAAGAAACTTGCAACTAAAAATAATGAAAGTTGAACTGTAAATCCTTGTAAAATAAGTTAGGCACCATCTACGCCACTTTTAGATCTTTATTACTTTCACATTGGAGATACAATGAA…
>Peanut_newGene_822	Peanut_newGene_822.1
GCCGCTGCCGGTGGAAGTAACCAAACAAGGATAGGAGGTCGCTGTTGATGCTGTCGCAGAGAGGAAGGAAGGGACGCGTGTGAGAAAGTGACGCAACAGAGGAGGAGCCGTTCCTCTGCCGCCGCCGGAATTCCTGGTCGTCGCCGCCGTCGTTCATGGTGAGTTGGTTGTGCCCTAGCTACCAGAACCACCATTTCTGAACTTTTATTGCTCTGTAACAATCCTCTAGCTCAGAAGAAAATTGAGAATCAAGGAAAGCATCTTTGTTTAGTAGTATATGGCTCGCTGCCACCAGAAACTCGAACAAGGCAGGGAGAGTTTGTAGATATGGGTCAAATTTTCCTGTTGGAGAAGTAACATGCATAGATGCAGAGGATCTACCCTTGCTTAATTCATCTT…
>Peanut_newGene_832	Peanut_newGene_832.2
ACCACTCTCTTCACGTCACCATTGTCATCCCCGTCACAACCTTCAGCATCTTCACCACTCTAACCTATATTATCGTTATTTCGAGAATGATCGACATAGCAAGTCAGCAGTTTCGAATTCGTGCTATTTGTGATCGTGTCTCTGTCGTCCCTGACTGAGGTAAGCATTTTGCATTTTATTGATCGATTGTTGTTACGTTGTCCTTATGGAGAGCATTGTTGTGTTTATTAAATATTTTGTTTGAGTAAATATCTAGAATGGAGATTACTTAGTAATCTGTATATTTTGTATGAGTGGATATGGTATTCATGCATAAATATAGAAGGTCAGGGTTAACAGCATCACAAATTCTCTTTTCACTTGTCTTCAATTCTTGGTTCTACCTTGTTCTTTTGCTTC…
>Peanut_newGene_839	Peanut_newGene_839.1
CGTGGTGAGTTGGTTGTGCCCTAGCTACCAGAACCACCATTTCTGAACTCTTATTGCTCTGTAACAATCCTATAGCTCAGGATGCTGCTGTATTAATTGCTTTCCTGATTTCTGTCGTGTTCCACGAGGTTTGTGTCTCTCTCTAATGCTATTTTATCTAATGAAAGAAGCATCCATTATTTTCTTTTCTCTGGTTTGAGAAGTTGAAGGAAGGTGATGTTGCCCCAGTCGTAGTCATTACCTCTGAAGTATTATTTCTCGTTTTATCCTTGAGAAGTTGTCAGTGTGGCTAATGCCGCTGCTATTTGTTCGGCTCAAGACTGTTGCTGCTGCTACCAGTTAGGATGAACGGGTCAGGCTTAATTTATGTGGATTTCGACACATTGAGCTGGTAAGTTA…
>Peanut_newGene_841	Peanut_newGene_841.2
CTTCATGGCTATGTTTTATATCTCATGTTCAAGGCTCATGCCATTTTCTCTGTCAGGTATCTTTTACATGCAGTGCAAGATCTGATGAGACTATTCTAGTCTAGAATCATCGGGTCCACCGAAGTCATCAATCAATCTTGAAGACGTTCTTTGATTGATAAAAAAAAATGGAAGGTGAGCAGCACCAAAGATCAAAACTGAATAAAGCTAAGCAGATTGTGAGGCTAAGGGGAATGCTTCGTAGGTGGCACAGTTTCTCATCCTCATCCTCAACCTCAATCTCATCATCACCAAACATTTCAAGTAGCCCCAATTACAACATGATTGACAATTCTGATTACCAAGAACCCACAACTGATGATGATCCAACCTCAAAGAGTAGAGCACCGTGTAATTGTA…
>Peanut_newGene_842	Peanut_newGene_842.7
CCCACTGAACCTTGACTCAGATAATCACTCCTTGAAAATCCACTCCATCTCAACATTCTCCACCGACAACCGCCCACCATCGCCGTCACAGGCCTTGCCATCGCCGCCTATCGCTCTACACGCACATCTGTCTTCTTTTCTACACGCTCTACCTCAGATCTAGGTCGAATCCACGCCAGATCCACTCAGATCCAGCTTTTTGAGCTGCCTGGACTACCTTCCTCTTGCTCTTTGCTTATCCATACTGCTTTTCGCTGGTCTTACATTGAGAATTGGGAAGGATGGAATCGAACCTTCACGAGCTGAGATTTTTCTCAAAATTCATAAAAGGCGTAAGGATGGTAGACCATTGGATGAGGAATCTCCAAAAGCAGTGGAATTAATTGAAGAGAAGTTGAA…
>Peanut_newGene_844	Peanut_newGene_844.1
CAGGATCATAAACTTGATTCATGCCAAGGGAAAAACGCATAAAAAATCCATTGAAGTTTGTAGATGAGAGGGAAAACAACAATGCTTCTCGTTCACTTCAACCTCCAGCACCAGCAGCATCTGAAGATACCACTAGTGTAGAGGCTAGTGAGGCTCCTTCTAAAGCTCCTTCTCAAGTCGTTGCAAATTCCATTTCATCTGATGGAGCCACACATTGTTCTAACTCA
>Peanut_newGene_846	Peanut_newGene_846.1
CGCGTCCAGAGAATTCAGAAACACAATTCCCTTTTACCCCAAATTCTCCATTTCAGCACCAACCCACGTCATTCTCCGCTGCCGTCGCCGCTCCGTCACGGTTGCATCGCCGGCGCTCCTCAACACATACTCTCTCTCAACCATAAATCCTACTCCGACGCCTTACCCAAACCAAGGGTTTTCAGCGAGGGATAACAGGCAGGAGCACGTAATTTGAAAACCCTTACTGGCGCTGGTTCCGAAGTTCCCTTCGCCATTGTCGCTGGTTCTACTTGTCGTCGCTGCTAGCTCGTGCTTATCCAATGGCCTGGTGAGGGAACAAATTAACACGGGATATTATAATATATACAAGCTGAAACCAAGGTCTATATATAATACAAGCAGGGCTGTTAAGGTGTG…
>Peanut_newGene_850	Peanut_newGene_850.2
CTATCCCTCATCTTACATCCTCTAACTCTCCGCAGTCCGCAGTATCCCCATTTTCCCCTGGAATTTGAAATTTTGAATCCTTTCTAATATTTGTTTTCAGTTGATCCCATAAACATAATTACATAACCCACTGCCATCTAATCTAATGTTAATAAAACGTTAAATGCACGTCAGGACAGTTTCCGGGAGTTTCTCTCACCAGTTACTCCAAATGCCGTTCTTGCGTTTATTGAGTGTGAATGTGAATGTGATTGTAAAATTACTTCACAAACATATCCGACTCTCTGTAAAGACGTGGGTTACGTGTTTGTTTGTTTGATTCCTTTTCCTTTTCTTTTCTTACAACTCTGCTGCATCACTTTTTATTTTTTATTTATTTTTTCGGTGGCAGATTTACTG…
>Peanut_newGene_851	Peanut_newGene_851.1
AGCAGTATAATATTCAACTTAGTTCATTTGTTTATTTCTCATACATAAAAGGAGTAATTGCCTCAAAGAGCATTCATTGTCATTGCTCTGAATGTTCAAAAGCTGGGAAGTACCCTAAATCAATATTCAAGAGGATGAAATAATTTTTGCTTCTTGTGTTGTTCTTCTTGTTGGCTTTTTTATTTAGTTGTGATATTTGATTTAAATGTTACAGATTTCAAGTATCTCAACATGTAGTAACCTCAATTATTCAGTAGCATAAACTCAAGCTATTCTATTTGTATTGAGCTAACTTTAATTTGTTTTCTTTTGTTTTAGATTGAATCTTAACTCTATAGTTACTCTATAATTTGTTTTCTTTTGGGTGATGCAAGACCAGGTTAAACCAAGCTATGTTGA…
>Peanut_newGene_853	Peanut_newGene_853.1
CCCGGTTTCCTTCTTCCCCACACCCCAGCAGCAACCGAAATCCCTTCTCCCCCCTTCCCCTTCAACAACACAATACACACACTCTAAAACAAAAAGGAAGAAGAAATGGAAATAAGGAAAGGGGTGAGAGCAGAGGGGGATCCGAGAGAGAGGAGTGGAGCTGCGTTGGGAGAAGAGAGGGCGGAGACTGCGCCGCGCGCCGGGCTCCACCATCGACGCCGCATCGCCGCCAGAACCGTGCGAAGGACAGGGGAAGATCACCACGTTGCTGTCCGTGCCGCCATCACGCGCCACCGCCGTCGAGCCTTATCGCCGCCGTTGCTAACAGAAGAAGAAGGAGATATCGGGGAGAGAGGGGAACGTTGCACCGGCGTGCTGGACTCCACCGCCGCCATCGGA…
>Peanut_newGene_856	Peanut_newGene_856.19
CATTTTTAGAAGGTAGTTTATTTGTTAAATTTTAGATAGTGAAGTGATGGCAAATGTATCTAAAGCCAAAAGCTTCACCCTTGCAGAATTTTTTTCCAAATTTTCCCGAAAGCACACTCAGGCCTCAGCTCACACTTATTTTTTGTTTCCCTCCAAAGACACTCATCACCTCCAAAGCGCGAAGAAAACCCTTTCAGAGAGCTGACCATCGCAAAGATCGAAAACCTTCTCACTACCGCCATTGCCCGTCGTCGCCCCCCACTCACCACTCACCACATCGCTGCGCACTGACCGTCGCTCCTCTTCACCCTCCTACACTGATCATCGCTGCACCGCCCTCACTATCGTCGATCTCTGCGCTTCTCATCGTTGTCTCTGTGCTCACGTCGTTGATTAGAA…
>Peanut_newGene_861	Peanut_newGene_861.1
CGCACAGAAAGAGGAGACGGCGCCGATAGAGCTGGTAGCCGCTGTTGCAGTCGATGCTCGCAAAGAAGAGAGAGAGAGTGAGGGCGATCGAGATGAGAAGAAGTAGAGAATGAGAAGACGCGAAGATGAGGAGCCGTCCCGCACTGCCACTGCGTCGCCGTCATTGTCACGCGATGGAGGAGGAAGCCGTTGCCGTCGCCATCGAGCACGAGAGAAAGAGAGAGGTTTGCAGTGGAGTGAGAAGGAGGTAGAGATAGGCACGATCGAGAAGGAAGCTCGCGACAGAGATGAGACGGACCGTCGCCATCACCGCTGGTGTGGTCGGAGTTGCCGTCGTCGTCGATTGAAGGTACCACCGTCGTAGTGGAACAAACCCAGAGAGAGATGAACAAGGCTCGA…
>Peanut_newGene_864	Peanut_newGene_864.3
CTACTTCTCTTCTTTATAAATCACTTTATTCCCTCTCGTCCCCTCTCACTCCTCATTCAGGTCACAAGCTCATCGTTACGGGGCCTTAGCTTCTTGGCAGTGGGGAAAGGAGGAGAGAAGAAGGTACAATACAACTAAGAAACGTAGTTGATAGAAGAGTTGGGGAAGGTGCAACTAATAATAAAGAAGGAGCAACTGTACTTGTAGAGGAGTGGGTCCCTTGAATCACATGGATGCATCAACGGCTTTATTGATCCTATCGGCTATTGCAGGCTATTTAATATGGTTCTCATTCATCGCTCGTCCTCTAAGAGGTCCACGTGTCTGGCCCCTATTGGGGAGCGTCCCTGGCCTCATCCAAAACGCCAACCGGATGCACGATTGGATCTGCGAAAACCT…
>Peanut_newGene_866	Peanut_newGene_866.1
TCTCTTCCCTTCTGTTTTTCTCATTTTTATTTCGGTAAAATATATAAGCCACACTTTTGTCTCAAAAAACAATCATAAACAAACACAAACCCCAGAGAAAATAAAGAAAAAGGAAACGTAGAAAAAAAGCTTCTCCAAACTAATATCAAAATTCATCTCTTCGTGGCCCTCAAGTTTCTTCTGATCCTTTTCCACTTCCTTTCGTTCTCAGGTTTCTTTGGAGTTGAATCGGTCCAAGTTGGCTCCTTTTTGGTGCAAGATCACTGTGACCCATAGAGGGTCTGTGTCAGCATTGAACCCAATTCCAATTGGTTAGGGAATAGAGGAAAGTGCTAAAATGGTTGAATCAATTGCTACCACTTCACTCCTTGGCCACCTTCCTGTCTGTGGAGGAAATTT…
>Peanut_newGene_868	Peanut_newGene_868.1
TAATTAACATCATCCAAGGCTATGACCAAAACGGGTGAGATTTTAGAAAAGAAAATGGTTACCGAACCGACAAAGGCTCCCCATTAACTCTGTATAGTACTGAGTTCTGACGCTCACTCTCATCGTTTCCTCTCTCAGCCAGCAAACAAAGCAACCCAAAAAACACTGCATATCCAATTCTCAAAACCCTAATTTCACCCCCAAATTCCAATCCAATGGCTAAAGAGTTCAAGGTTCCGCCGGTGGCCTTCCCACAAGCCGGAAACCCCACCGCCGGAGGTCCAAACATCCAGCAGCGACGCATGGCTGCGCCGCCCTTCCAGCCAAACTCCGGCATCCCCTTCATGTCCTTTGACATAGGCTCCGCCGCAGCGTCCACCTCATCTGGCCCAATCTACT…
>Peanut_newGene_871	Peanut_newGene_871.1
CACAGATATATAATTTTTTGGGGATTAGGTCATTAGGCTTCAGATGTCATCGTCACTCACGCTTTAGTTTCCAAATCTGAGACCCTCAACTCCCTTTTTCTGCTCTTCTCAAAGCCTCCAAAAACGACCGCCTCTACTTAGCTGCACTAGACCACCTGTCACAGCCCGCCCAACTCACGCTTTAGTTTCCAAATCTGAGACCCTCAACTCCCTTTTTCTGCTCTTCTCAAAGCCTCCAAAAACGACCGCCTCTACTTAGCTGCACTAGACCACTTGTCACAGCCCGCCCATCCCTACAGCAGATCGGCGTCCTCACAACCACCGAACTCACCTGTTCAGCTCTTCTCCAAGGACTACAGCCTCTGCTCAACTACTTCGGTCACCTCGCCGCTATCCCTC…
>Peanut_newGene_874	Peanut_newGene_874.3
CTAATTTTCACTCACCTTTACCCACATTAACACACACGCCGCACTCACCTCACCCCTCACCCACCTTCCACTGTAACACACACATGGGAAAAGAAAAGAGAGAAAGGAAGGAAGAAGAAAGAAGGAGGGGCAAGGAGGGAGACGGCGCCGGTGCTGCCGTGGCCGTCGCTGTCACTAAGAGGGAGAGAGAGAGAGTTCACGGAGAAGAGAGAGGGAGACACACGGAGAGAACCACCGCGAGGAGAGGAAGAAGCTGCCTCGCCGCCAAGCCGCTACCGTCGAGGATCCCGTCCACGTCACCATCGCCGAGGAGAAGTCGCTATCATCGCCGTCCTCATTGCGAGCTGTCGCCGTCGTCGTAGAATCCATCGCCGCCGCCGAAGCTTCAAAGTCACCGCC…
>Peanut_newGene_878	Peanut_newGene_878.1
GATGAGTTGGTGGTTGAGGGGAATGATGGCTGGCTCGAGGCTTCAATTTGGTTTGGGCTTCGGACCAGGCTTCATTCCTCTCAAACTAACTAAACTCCATCATTATATTCTTCTTTTTCTTCTTCTTCTTCATGAGGGAGGTGGTGGCTGCTTCTGCTGCAAAGGTTAAGGTTGAGAGGAATGTTGTCTGGCTCGAGAGGTCTTATTAGCTTCATGAATTGTTTGATTTGATGATGATTAGTCAAAGTGACTAATAATCTCGGACCAGGCTTCATTCCCCCCATCCAACCTTTGCTATATGCTTCTGCTTCTGCTTGCTTCCACTTTCTTTTTAATGTTAAGTTCCTCTTTTGCAACCTCCAAGTTTTCCAAATTAATTATAATGGAAAATAAAATGAA…
>Peanut_newGene_879	Peanut_newGene_879.1
GTGATTTTTAATAAATTGGAAACAAAGATTTTTTGGCATTTTCTTAAAGCTTGAAATGCGATATCGAACTAAAGGCTCAATATTAAATAGTTAAAAAGAAAAACAGGTTAGTAACACCTTACTTTTGGTATGATCATGATGTATTGGAAGTTGGGTCGTTACAGAAGTCGATGACAAAGACTTGGCAGGCAATCCGGCGGTGCAAAATGAAGCAGATACACTTGTAAACTAGCACCCCTTTGGTATTCCATCTTTTATGCAAACTTTGGATCTCGCAGCCATGCATGCCTTGGAATTTTCTGAGTATGCAAATATGGGTGATGGTAATGTTGTGGCAGAAGATGGTGACTTTAGTGTTGGAATGGAATTTGGTTTTAGAGAATCGGTGATATCCGCAAT…
>Peanut_newGene_884	Peanut_newGene_884.1
CAAAACGATAAAACCCTAGCCCTAGTTTCTTTGCCACGGCCGTCCCCAGGTTCTCAGCGCTTCCGCTTCTTCCTCTTCCCCCTTTCCAGAACCCAGGTTGCTCGGCACGTCATCCCCATCCTCGCTGGCTTCTCTGTTCGTGGCTTGGACCAGCTCGCCTTCAGATCACCGCTTGCCATCGTCTCTGCTCTCGCCGTCGTCTTGCCGGTTGCCATCGTGTCTCCGTTGAAGGTATATATATCTTGGGCTATTCGACAGCGAAGTAGAAGCTGCAAGATCCTAGTGAAACTTGATAACAGTCTCACAATTGTTCTTTTGCTGGTGTAATTGCTGATAAGTGCAATGTTGTTTGCCAAATCTATTCACAGTTTGTTCTAAGTTAATTGTAAACTTTAGTTT…
>Peanut_newGene_885	Peanut_newGene_885.2
GTTTCTCAAATTCATCTGTTGCATGAACCATTCATTTATGTATCTTTCCATATCTCATTATCTATTTTCTTAAAGGTGTTGTTTCTTTGATGATTCCATCAATATCATTGTTTATTTAGTTGTTAATCAACCACTTTGTTAATGTAAAATAAATTGAAATTCTAGGCTTGGGTAAAGTGGGGACAGAGACGCCAGTTCATTCCCCAGAACAAGCTAGCCTTGGGAAGAGCTTAATTTGCTCATGCAGGTGGATCTTGCCTCTGCTCTGTCTTTCCTAGTCGTTTTATCATTGGTTGATTTGAGGAGCTGGTTGATTTAGCCAACTCAGATTCAACTGCCACTTCTCAGTACCAATTTAGCATTACCGTTTTTGAGCTCTATAATCAACAGACAGAGAAC…
>Peanut_newGene_892	Peanut_newGene_892.1
GCAACTTCTCCTCTGCCTCCATCGAACGCCGCCCCGCCGTCAACCACGTGCGAAAACAGTCGACCGTCGGGGACCGTTCCAGAATGCCGCGACGCTCTCATCCCCCCGTAGCTTCCCCAATCTTGGCCGCGGCGACGTCGTTCCACCCAGGCACGAGAAACAAGTAGGTTCTCCTACTCATGGAGGGCGCGCCGCTGCTGGTGCATGTCGGTGTTGGCAGCGCCCTTGAAACCACCCGACTCTGCTCCAGCCTCGAAACCTTCCTGCACATAATCTATTGTTTCCATTAAAGCATTTGGGCCTGTTTCTTGTGAACACACACCAGGATTGTATTGCAGAAAAGCCAATCAAGATGGAAAAAAAAGTACAACGATATTTACCGTTATCGACGTGTCATTC…
>Peanut_newGene_894	Peanut_newGene_894.1
GAGGCAACCTCCCTACTTTAATTTATCTTAGAAGAAAAAGGTTAGACAAGTATCCCTTTCTATTTTCTTTCCCTCCCTCATCACCAGTCACTTGAAACCCTAATAGCCTTACCCTCCTAAGTCCTAACTTGCAAACACAAAAGAGAGTAAGATACATATTTAAGTGCGTGCGTGCGTTGGAGTGTTTCCCCCAAACCCCATACCTATGAAACTCTCAAAGTCTTTCCATTAATGGATTCGGGTAACAGCAGCGGGAGTATGAGCAGCGGTGCTGATGAAGAGAACGAGTCACGCGCCCACTCGCTCTCTTCTTCTTACATGACACCACCTCCTCCCTTCACCACCGCCACTAACAACACGCAGCAGCACCTGTTCCTGCAGGATCCTCTACTATCAAAC…
>Peanut_newGene_902	Peanut_newGene_902.2
AGCAAAACTTGCAAGTCCCTAAAACTCAGAGAATTAATGGCTTCTTCTTCTTCAGCACATATCACAATAGTGCTTATCTTTCTTTTGTGCATTCCATCATTTTCATTATCTCTTGTTCATGAAATCACTTATTATAACAAGATAGACCAACCAGCATCAATGGTTGCTCTGCCACCAGACACCGCTCAAATCAAGTGTGGATCATGTCCTTGTGGGGACACATGTGATCAGCAACTTTCTCCGCCGCCGCCGCCTCCTCCACTTCCACAACCTTGTCCTCCCCCGCCGCCACCGCCATCACCACCACCACCTCCTCCTAAGTCTCCATCCTGCCCACAAAACTGCAACCCTTCGTCGCCGCCGCCGCCAAGGTTCATATATGTGCCTGTGCCAGGGCAG…
>Peanut_newGene_905	Peanut_newGene_905.2
AGAGCACATAATCAAATGTTTGTATTTACTTCTTCTACTTGAAAGGTGGAGTCATTTATAAACAAAGGCCATATACGTGCTACAACGGTCTACAAGATTAGTAGAGAAAATGTTCATTATATTGGTAGTTTAATGCCTATGCCCGGTGAAAAACTTAAGTTTGCTCAGTTGTATATCTATGACACAGAAAACGAAGTAAACAATAGGATAACACCATTTAGGTCAAATGATTTTGAATATGCTATTTACCCTGAGATTGTTAGCAAGTTACAAAAGATGGGAGAATTTATATTTTGCCTGATGTTTTTGAAGTGGCTGCTTTAGTTGTTGGTGATATTGATTCTCTTTCATCAACTAGAGATATAATCTTAGAAAGGCAAGATGGTCACTTAAAGCATA…
>Peanut_newGene_921	Peanut_newGene_921.2
TGCTAATTTAATTTATTTTTTTACGCGGTTGACAGGCATCTATCAGCTCACGAAGCATGAGGTGTCGCTTCCGTCATTTCTCAGTTTGGCGTTCCTAACATATGAGTATTGGACTCTCGCCCTATTGCAGTTTTAGTGACCTACTGGTGGCCATGATGCAGGAGGTGGCAGCTGCAACTAGCTTCAGTGCCATACCCTCATTTTGGCGGGGATCACCGAGGTGTTGGCGAATTATTAGTTTTTCATTCAGAGTATGTGTCAATAAGTAAAGTACATGATTTGGCTCCCATTTTAGATTTCCCGTTGCATGTTCAGTGACTCAGCACGAGTTGAAGGTTATGGTTAAGTATGCTTCTGTTTTTTTTGGGACGCTGGTATGCTTCTTTATTTTCTTGATAA…
>Peanut_newGene_924	Peanut_newGene_924.1
GTCCAGAAGATTCAATTTGATTTGAAAGTTGTCCTTTTTTTAAATATTGCGCAATATTACCCTCTCACAGAAACACGCTTTTTTTCATTCTTTCCACAGATCTACTATTTTTGTACACACTATAAAAAAGAGATGAAGCAAAACACTCTCAGACAATCTTAGATTCAAACATCATCAACCAATAAAAAACACTCCTCCAACAGATCCAAACATTCTCACATCCAACTGAACGCCTCTCACAATGAAGTAAAACAAATGGAAAGACAGAAAATGATTATTGGATACAGAGTTAAGATGGAAACAGAATGGAAGATCGGACCAAAACAAGGATAAGCGCGGTGCTGCCGACGAGTTTGGAAGCTCCGAGGGGTTTTTCGGAAATCAGGGGCACAACAACCG…
>Peanut_newGene_931	Peanut_newGene_931.1
TGTTAATTAGTCCATTGATCACAACATTTTACTAATTACATTACATCTCTCATAATGAGTCGACAAACTAAACCCCAAAATGTGGACCAGCTCATATCCCTGCGTGATCCACCCCGGCAGTCCCGCAGCAGCAACCAGCAACCTCACAGCAGCGGCGGCAGTAGCAGCAGCAACCAGCAGTCTCGTGGCGGCAGTGGCGGCGGCAGCAACAGAGCAGCGAAAATTGAAGACATGGCCTATACGCCTAACATGACCACAAAACCCACATGATCACTAGGAAACAAAACAGGTACATGCATATGTGGAAGTGGGAATAAGCTTGCAGCAGCAGCAGAGATTGTTATTGTTGATCAAAGATTATTCATTATTTGGTTAATTAATTGTAATTCGTTAATTATT…
>Peanut_newGene_950	Peanut_newGene_950.1
CTCCCTCTCAGTGTCACTCACCGATTCACTTCCTCTCTTCTTCGATGAACCCCAATCTCTCCAGTCCACATCTCCTCCATCGTCTGCTGCCCTCTAAACCCCTTTACCGTCGCGATCCTCCTTCTCATTGCTTCCTCATCTCACCCTCAAGGTCATCGCAGGAATCGTCAGTTCGTCACGCACCGCCTAAGACGCCCCTGCCAACGAGAACATCGTCACCATCTTCACGAGAGTGTCGCCATCTTCATGGGAGGGTTGCCGTCTTCACGAGAGCGTTCCTTTCTCTGTCGCAGCAGTGAGCATCAAAGTTCAATTTTATACCCTCTTTTGGAGAAAATGGCAGTGAGATG
>Peanut_newGene_953	Peanut_newGene_953.1
GGTCAGACAACCCTCATTTTCTAAGAAATCCCATTCTGAATTTGCACATATATGGAACAAAGCTGTAGATCAAACATTTGGACCTTTGATAAAGTCTCTCAGCTCACGTGGATGGTAGAAATGTTATGAGTAATTTTATTTTCAATATTGATGTTTCAACTTTTGTAATTGTGAAATCAAAACATGCAATACTTGCCCTCCTTTTTACCATCACATTCAATTATTTGCTAAACCGTTGTGTACACGGGCAGTTATTTGTAGACCAATGTACTACAATACTCAAATGATGCTTCAATATACAGATCAAGATTCCTGA
>Peanut_newGene_954	Peanut_newGene_954.1
TGTCATATTAGAAACCTCTAAAAGTGTAGCAGTTGACAAATTTCCTAACCTTTGCGGATCTGCCTTCTTGGACTACAAAGGATGGCAGATCATGAACGGAGAAGGAAGGCCATGAAGAAGCAAAGATCATCATCATCAATGGTCAGAGAAAGTATTGTTGTACATGCAAATCAAGAACAAATGGTGGGTATTCTTTGGAATTTTGAGAGGGATTCTTCTTCTTCTTCATCAATCAAAGGTGAGGGTGATAATCATAAGAACAATAATAGAGATCTGGATGATGACGTCATGCATGATCATGATGATGATGATCTTTCACATAATACTAGCTTTTGTTGCTACCTTGGTTCAACAGCAAAAGCTGCATAGCCTTAATTCATTTCTTAATTAGCTTAATTC…
>Peanut_newGene_959	Peanut_newGene_959.1
GTGAAAAATGTATTTTGGGTGGATGTAAGAAGTAGGGCAACATATGATTCATTTGGGGATGTGGTTAATTTTGATACAACATACCTGACAAATAACTATTACATGCCATTTGTTGCATTTACAGGTACTAATCATCATGGACAATCTGTTTTATTTGGCTGTGGTCTACTTTCAACTTACAACGTCGAGGCCTTTGTGTGGTTGTTTCAATCTTGGCTTCGTTGCATGTCGGGGAATCCTCCTAAAGATTCAATGAAGAGGGTAATTCATGACACTATGACAAGGTGAATTTGAAGACCAGTGGA
>Peanut_newGene_970	Peanut_newGene_970.1
AAAATTAACACTGGAGACTATAACCAACAACAACAAAAAAAAAATAATAAAAAAATAACACTGGAGACTGCAGGCTGCTGCTCTCAACGACCATCATGCCATGACGGAGAAGGCGGCGCCTCCACCGTCGAAGCCGCTAACACCTCAGGAATGGGAAACCCTAATCGAGGACTTCCAATTCAGCGGCGAAGAAAGAAGGCAGAACAAGTGGAGCTCTCTCCCTTCGCTCTTCGATCAACTCCTCAACTCGGTCCTCCGCAAGGACTTCCCTCTCTCCGTCAAGTTCTAGCTCCTCGTATTCCTCGACGAGTTCTCCGATTCATTCTTCACTTCCGACGACGACCACGCGTACCAACTCGACCGTGTAATTGACGCGCTCCGCACCGTCGTCCAATCCCC…
>Peanut_newGene_980	Peanut_newGene_980.1
CAATTTTCTTTAATTTTTTACTACTCGTCGTTGTTTGTTTCTCTCTCTCTTTTTTTTTTCAAATTTCCTGAAAATAATTTGAAAAAAACAAACAATGAAAAGTGAATATGTGTGTATAAAGGAAGTTCATCCACTGAATCACTCACGTTTTGTACTTGGGAGCTCTCTCAGCTTCTGAGCTCACTCCTTCACTCCCCTCAGCTACCTCATTTTCCCATTCACTAAAACAAATTTAAAATGAACACGGCGGTTCACTCCAATGTCGCCATCTTGGTGTTGGTGGTTCTGTTCGCGGCGGATCCGGCGGCGGCGTGGAGGCCGTGGCCGCAGAACGCCAACAGAATGAACGTCTCCGATTACGCATTCGGCGACTCAAAGAAGTACGAAGGTTCATCGGAG…
>Peanut_newGene_983	Peanut_newGene_983.1
CAAAAAATACCAACTAAAGAAAACGAATCGTTGCTTCGACAGCTGCTGCTCTGTTTGGCTAACAAACTTTTGGGGGGACGATGATTTAACTTCGAATACCTTCAAATTTCTAACTTTTCAAATATTCCAGTTGTTGCAATGGAAATGGAAGGTCATTCATTCTCCAAGCAATTTCTGAGTTTGGGCAAAAAAGAAGGCCATGAACAGTGGACTTATCACTCGCCATACACCGAGGGCATAAGGGAGACACCGAATGGATCTTGGTTCCAAATCGAAGACCAAATCTTTTTTACTCTGCACTGCTCTGGTAGGAATTTAGTTGGGACATGGTAAAATTGGAATGCCAGCAAATACCCTGAAGCAACGGAATAGTTTTCATTCCTCTCCCTAGGCCAGGGA…
>Peanut_newGene_991	Peanut_newGene_991.3
TCCAATCACTACTTCTCTTCCTCCAATTTCTCAACCTACAACCAACACACACCCAATGTGAACAAGGTTAAAGGCTGGGAACAACAAATCCAAAACCTTCACTTGCATCACAAAACCTCTTGAACCAAAATCACCAAAGGAAGTACTGACCATTTTTCATTGGAAACAAACCATAGTTAAAAAATATGCAACGTTGATGAGAAATAGCATTGTTGAGTTTTTTCTAAACTATCAAGCAATTGGACCTAAGTGAGTATTTATGGTGAAATATTACCAGGATGGCTCCATTAACAAGTACAAACCAAAGCTCGTTGCTCTTGGCTGTCACCAAAAGCCTAGTTTCGACTTCAAAAAACATTCAGAAGAAGTTTACATGAAGCAGCTGTTTGGATATGAAGC…
>Peanut_newGene_1167	Peanut_newGene_1167.1
TAGGTATAGCCTTTATGTCTCCATCTGTAATCCACAATATGTCGACCAAAGTTTCATCTCACCTGACTTGGGTAGATATAATTGTTCTTACTCCCGTCCCTGTAATTGATAGAGAGTATGCTGAACAGTTTCATAGACATCATAGGCTGTGTGAAAACCGGGAAGATGAGAGAAAATGAGCTTGAGGAGAGCGTAATTGGCCTGTTCCATGAGTGTTGGGGCCGGGCTTCTTATTTGGACACCAAAATTTTTTTAGGAGATCACAGTCAACTCCAGTCCGAGCTAGAAAGGATGACTCCTAACTCGGTTGCCATGAAGATACTTCGGGCCACTAGGAAAAACGTTGTGGCTCGGGGCATACAATTAAAGGAAGGTGGTGAAACTGCCACCCTGTCCTCA…
>Peanut_newGene_1172	Peanut_newGene_1172.1
GCCACATACACACAAACACACCTATACCTCCCATGTTTCCTTCAGTAGCCGCCATTACCCCCTCACCCTTCTAACTCCTTCACATCTGTAACACACACAAACCCACACATACTGAGATAGAGAGAAAAGAAAGGAAAGCGAGAAAAGAGGGCTGAACTGAGAAGGAGGAAGGGAGGGGGACGACCGCCACCGAGCAGCCGGACCGAGCTAAGAAGGAGAAGAGGCCGCTGTTGTCATCGAGCTCGGTAACGCCCATAGCCGCCGCCGTTGTGCTCCAGCTCGTCGCCGCCATCTCAGACCGCCGCTGCCACCGCGTCACTCATCGCCGTCGCAAGGAAGACCAGGATCGAGGGAGAGAGCCGCGCGAGGAGTCACCGTCGCCGCCGTTCGCGAGAGAGA…
>Peanut_newGene_1179	Peanut_newGene_1179.2
CGTCTCACGCTGTTTATCTTTCGTTTTCCTCTTTCCTTCTCATCACTTCACAATACTCAATTACTCATTTCTACTCTTTCATTCCTTTGCCCCTCTTCTTTTCACACTTGATCCAAATCTCCCCCTTTTTCGTCTTCTTCACTTTAATATTGATCTATTCCTTCTTCCGTATGCGTCTTCTCTCAAGAAATTAATTTTGACAACTCAATTTTCCTCATCCCTTCTTCTTCTTTCTCCCAATGTTAACGCCAATTGAAAACCCCATTTTTTCCCATCCCCGAAAGCTGAATCCTTTTCTCTCCATTTCCATCATCATCGGATATCCGTAATTTCAATTTTTGGGTTTTTATCTGGTTCCGATTCTTGCTAGGTTACCTGTGAAGCCGCTTCTTAGGTGCA…
>Peanut_newGene_1186	Peanut_newGene_1186.2
TAAATCCTTGGCTTTGCTAGGTTTTTGCCTCTTTTACTCGCCTTGGTTGTTCTATGTTCCTCTCTATCCGTGCTGCTTCCTCGTTCTCCCCTGCACCGTGTTTGTTTTCTGATCCTCGACGCCGCAACACGTTTCTGCCGCCGCCGCTACACTTGGGGAGATGGGAGGCCATTTTGTGTAATTTCTGAAGTCCCTGGTTCCAGTGATGAAGATTATTTTAAAGAAGTTTACAATGTGACCATTTTACTTTGATAAATTTAATATTTTTAACAAATAATTTCGAATAAAGATATCAAACTCTAGAGTTCATTTGAAGTCATGAAGCTTATATAAAATTGAAGTCATGAAGCTTTGATAAATTGGAAGTTTGGCATGGGAATGAATGATGAATTAGGTGTA…
>Peanut_newGene_1191	Peanut_newGene_1191.2
AAAATTCTCAAGGAAAAAAAATAAGGGAGAGAACGAAAGAAAGAAAAAATAGAGAGAGAGGCAGAAATATTGTAAAAATTAGTTTATAGTGATTTCTTTCAATTCTATAGTAATTTTGTGGATGATTTATCTTTGCTTAAGTGTCACCATCACAGTCATTGATTAAGTAAAGTTTTCTAAACTTCATTAATCGTTTCATTAAATGTTTTTACATTGTATTATATTCTATGTTATTTACATTATACCACATAACATATATGTATTCCAAGTGCAATATACAAATAGTTAAATTTTGCAAATATTTCAAAATTAAGAAGTTTTATTCCTAATTCTTCTACCCCATGTGTCTGTATGTTTTGGTGACTCACCGACAGGGTTAAGCTGATCCGAAACCGAAGA…
>Peanut_newGene_1203	Peanut_newGene_1203.3
CTGTGTCTCGTAATATATGTGAACCAAACGGAGCCTAATTGCGGAAGATCACCGGCAGCCCAACGCTATCTCCTCTCTCAAACTCTCTCTCAGTTTCTCCCACGAGCTCAAGCTCTCGTCAGCTCGTCTCATCTCCGGTCTCTCACCTCTCGTCTCCGGTCTGTCAAGCTCTCGTCAGCTCAAGCTCTCCCTTCCCTGCGCTAGCTTCGCCGGTGGCAGAAGCAGACGGAACTGCATCTGGTCCCTCGGGTGGTGGTGGTCGTCGTCTTCTTGCTTCTCACGGTTTCTGTCTCGCACCTGGTCTCGATCTCTCCCTTCCCTGCGCAGCTGCGCTCTTCGTCGCCGGTAGCAGAGGCAACAGATCCCGGTGGGCTGGTCTTCAGTGTCGTCTTCTTGCTT…
>Peanut_newGene_1205	Peanut_newGene_1205.4
GCTTTAGGTTCTGGTGCACTCTGAGGGTAGCTCTTTTGATAATGCTTTCTCATTGCAGTTTATGTGCCATTGGCAATTCCGAGAGGCACTATAGCAGATGATTTTTGAAAGGCTTTATTATTTTGTAATCTCTTACTTGATCCTCTCGATATTTGAAGTTTTAAAGCTGTTTATTTTTAAGTTAAAATCATCTATGTTTTAATTTAAGTCTTGAAAATAGCTTTAAAAATTATGTTTATCAAACTTCCATTTGTCACCATATTCACCAGATAAATTTTGAACGACCTTTAGCAACACCCTTTCTACGAAACCAAAAGCATTTTGATGTAAGACAGAAACTTAATATGCATTTAATCTAATTAATATGCACTCTTTTGGGGCAGGGTTATATACTGTACT…
>Peanut_newGene_1214	Peanut_newGene_1214.2
AAAAAAAAGGAGCAGCAAGTCAGTGTCAATAGCTGTAAGCAAGAAGGACCAATAAACCCACCATTAAATACTCTCTCTACTTCTCTGATCCTCTCTTATGGCACAGTAAAGAAGAATACCATAGAAGAGAAAGAGATAGAGATCGTGTATATATGCATGTGTCTTTCATTTTCTTAATTTACTCCAAATAAACATGCTTTGTTCTTCTGTCACTTCCTATATATGTTCCTAGCTGGCTATATTTTATTACTCATCAAGCTTCCGTTCTTCTCATCTTCTATCTATGTTGGTTTGAGAGGTTGAAGCTGCCAGCATGATCTGGTCATCTAGCAGCTTCAATCACTCAATCACCAACAGATTTTTTTATTTATACTTTAATTTCTTCGCTACTCATCATCA…
>Peanut_newGene_1228	Peanut_newGene_1228.1
CGTAATTGAAAAAATCTTAGACAAAGCTGTTACTGTAGAAGTAGAACAATGCGACGTCTCCATCACCGTACTGCACGCGTCACTCTCAACTCTCAGAAAAAGCACCATCATTCAATTCCCCCATCCCACTCTAATCTTTATCCTTAGACCTCTGTTTTTTCCTTCCAGTTGTTGACTTACACTGTACTACACCTTTGTGAGCTGCAACACCCAAAAAACCCAAACAAGCATTTCCCTTTCTTTATGCATCGCTCTCTTCTCTTGTCTCGTATAATCTGACCCTTCCATGTGACCAAAATTTAATCTCTCTTCTGTCTTCTCTATGCTTTCCACTTTCCTCCCATATGCATTTATTCTCCAAACCAAACGATATCTTATTATTATTTATTATTATTATAT…
>Peanut_newGene_1232	Peanut_newGene_1232.2
GTCATGATGAAGAAACTGGCTGTGGTATATGAACCTGGAAATGAAAGATAGGCAACGGTGGAGAGCCGAAGAGGATGCTTTATTGCGTGCTTATGTCAAACAGTATGGTCCGAGGGAATGGAATCTTGTGTCTCAGCGCATGAACCAACCTCTTAATAGGGATGCCAAGTCATGTCTAGAAAGGTGGAAGAACTACCTTAAGCCCGGAATTAAGAAAGGATCTCTAACCGAGGAAGAGCAGCGCCTTGTCATCAACCTCCAAGCAACACATGGGAACAAGTGGAAGAAAATTGCTGCAGAAATCCCTGGTCGCACTGCCAAGAGGTTAGGGAAGTGGTGGGAAGTTTTCAAAGAGAAGCAGCAAAGAGAGGCCAAGGTAATTAACAAAGGCGTTGACCC…
>Peanut_newGene_1235	Peanut_newGene_1235.1
CGTGACACGTGTACGTTATTTGTTTTGTTGCAACTTTCGCTGGTGTTTCCGATTCTTAAACTGAAAATGTCGTCTTGCTGTGGAGGAAACTGTGGGTGCGGAAGCGGCTGCAAGTGCGGCAACGGCTGTGGAGGCTGCAAGATGTACCCAGATTTGAGCTACACCGAGAGCAGCAGCACAACAGAGTCATTGGTGATGGGAGTAGCACCTGCCAAGGCCCAATTCGAGGGTGCTGAAATGGGTGTTCCAGCTGAGAACGATGCCTGTAAGTGTGGGCCAAACTGCAGCTGCAACCCATGCACCTGCAAGTGAAGAGCCCACACGCTCACACGCACAGCAGAAGCAGAGATCCTTTTAGTTAAATAATAATAATAATAATAATAATCATAATAATGATAT…
>Peanut_newGene_1239	Peanut_newGene_1239.4
GCAAGGAGAAGCAAAACGCATGGTGGGGAGGCTTTCCTTGCCGCTGCCGCCACTGGAATCATGAACCAAGGTGGAGGAGAAGGCCGTCTTCCCCATTGCTGCTATAATCGTCCGTGCTGCTACCGGTGCTTCTTTGTTCTGTTATTCCTTTCTAATTCTTAATTATTATTCTACCCAATATGAATTCATTGTTTTGCTCACTGTCGTGGCCAACTCGCGTTGCTGCTGCCCTGTCAAAGCTGTTGTGAGTGTTGCTAACATTGGCGGATAAGGGATGAAGGAGCTGCTGCATTTTGTGTGCAGCCCAACCGGTCATCCCACCATAATTCCGTCTTCAGTTTTTGTGAAATTTGATATCCAGTGACACAGGTTTGAAGACGCAATTTAAAGCTGCAAGCG…
>Peanut_newGene_1244	Peanut_newGene_1244.1
TACACACACAATACATATTATAGAAGAGAGAAAAAGGAGGAATCGGGAAAGAAGAAAGGAAGGAGAGGGAGAAGAGCGCACCGCCCAGCTCACTGCCGTGGAGCCGTCGCCTTGAGCCTACCGTCGTCGAGATCGCCCTGTCACGAGCAAGAAGAGAGCGAGCCAGAGAAGAGGAAGAACGCTGAAGAATAGAGACTGATGGGAAGGAGGGTAACACCGTTGTTGTAGGGCAAGCCACCGGAGCCACTACCATCGCCTTCGTGCCTCTCCGTGGCTGCTGCTGCCGCCAAACCCATCGCCATCGCCATTCCGGTTCCAATTCTTTGATTTTCAAGATCCAGCGGCAGCAACCCTCAATACAGCCAGAGCAGCGGCAGTAGCCTCAACTCCTTCGGAGCA…
>Peanut_newGene_1247	Peanut_newGene_1247.1
GAAAAAAATAAAGAAAGAAACAGGAAAGAAGAAAAGAGAAAGAAACGCAGAACAGGGAGGGAAGAAGAGAGGGAAAAGCGCTCCGCCACATGCCACCACGCCGTCATCACGCCGCCGCCACGGTTCCGAGGAGCTGCTACGCGAGGAGCCCTGGTTCGTTGACGACTCGTTGTCATGCACGAGCAGAGGAGAGAGATCGAGCAGAGAGAGAGACGCGAGGAGGAAGAAGGGATTCACGCTGCCAGCTGTGCCGCCACCGCCGCGGGAGGGTCGCCGTCGTTGTGCTCGCCATCGTCGAAGCTTCAGCCATCGTCACGCCTGGCTGTTGCCAGGGTTGCCACCGCCGCGTCTCACCACTAAAGAGAAGCCTTGCCTACGCCGTTGCCGAACCGGGCCAGA…
>Peanut_newGene_1250	Peanut_newGene_1250.1
CTTCCCACCGTGTGGTCCATCGTTCGCCGCTTCGATAACCCCCAAGCCTACAAGCATTTCGTCAAGACCTGCCACCTCGTCCTAGGTGACGGCGCCGCCGTAGGATCCCTCCGCGAGGTCCGCGTGGTCTCCGGCCTCCCCGCCGCCGTCAGCACAGAGCGCCTCGACCTCCTCGATGACCGCCGCCACGTAATCGCCTTCAGCATGGTTGGCGGCGACCACCGCCTCTCCAACTACCGCTCCGTCACAACTCTCCACCGCCGATCCGCCAACCGCGACGTCGATGAAGGTACGGTGGTCGTGGAGTCTTATGTGGTGGACGTACCGCCCGGGAACACCTCCGAGGACACGCGCGTTTTCGTTGACACCATTCTTCGGTGTAACCTTCAATCTCTCGCG…
>Peanut_newGene_1253	Peanut_newGene_1253.3
CCCTTATGAACACACCATGATGAAACTTCATTCAACACAAATCACTGTTCATCTTCTCATATCCTTCCTTTAAGCTTGCTCTTCTCATCTCTCTTTAATTCGAGTTGAAAATAGGGCAAGTGTGACTTCTCCGTCGTTTCTGCTTTGTCGCCACACGCGTCGCACGAGCTCCTTCTGTCACTGCTCGCTTGCACGAGCTCCCTCCGCCGCCGCTCGCTCGCATAAGCTCCCTCCTCTGCTGCTCGCGTTGCACGAGCTTCCTCTGCCGCCTCTCAGCTTATGTCTCTCTCTGTCTCGCGCCATCCATCCTCGCCGTTCACAGCCTCGTCGAGTCATCGTGTCACCAGATTTGAAACCTACATCTTGCTCTAGGTGCTGTAAATTCAGAGGTTCTTCTTG…
>Peanut_newGene_1271	Peanut_newGene_1271.2
TTCTTTCTCTCTGCTATTACTTTGAATAATGGGATCAACACTCCACTGTGGGTGAATTCGGAGGCTCGGTTCAACAAAATTTCAAGGGTGAATACGAGGGGAATTGGTGCTTTTGCAAAATCTGCTTGATTAGGGTTGTAAAGAACGTATGAATCAACAATGGTGGGAGGAGAAACTCTATTATCTCCACGTTTCGGATCAGTAATTGTAATGATGATATATGTGGCTCTGCAAAATTGGATTGTGATGAAGGATCTTAGGCCCTATGACCCGATAAAATTGGATACAATGATGTGTGGCTCTACGAAATTGAATTGTGATGAAGGATCCCTATGACCTGAAAAAATCAGATATGATGATATGCTTGACCCTTATGTTGCGAAATGATGATATTTGGCT…
>Peanut_newGene_1278	Peanut_newGene_1278.1
CTGCCTCCTCCAATAACATGGCCGTGATCAATAATGTGGTGTGTGATGAAATCTATGTGGTTGGAGAAGGAGAGACACTGCACACAATCGGCGACAAGTGTTCAGACCCATTCATCGTGGAAAACAACCCTCACATCCATGATCCTGATGATGTGTACCCAGGCCTTGTTATCAAGATTACACCTTCTCCTCGCAACAATATACTTAACTAAAACCCACCAGGAACAGGAGAAAGAGTACTTGCATATGTACGGACATACGTGTCTCAAATGGAAGA
>Peanut_newGene_1279	Peanut_newGene_1279.5
TCGGAGTAGTTTAAGCGTTAAGTCCAAAGATTAGATTTGACTGCTTGTATCATACTACCTAGGTGTTCATTTCATATGGAAAAAAATCAAATGGGGAGCTTCTATTATCGTATGGGTTTGTTCCAAGGGAAGGCGCCAATCCTTGTGATTCAGTTGAGTTGTCAGTGTCACTCAAGAAATCTGATAAATCCTACAAGGAGAAATTAGAACTCTTGAAGAAGTATGGATTATCAGGGTGAGTACCTAGAACTCCAAAATTTTACCACCATTCGTATATGGTTGAAGTTCCTTCTTTTTGCTTCGATAAAGATATTTCAAAAATAGTTCTAGTTTGATCCGTAGTTATTTGACATTTTCTAATTTACATAATAGCTTTTCCCAGGACAAAGTGACATGTCC…
>Peanut_newGene_1281	Peanut_newGene_1281.1
AATTGATTGAATACCGATAAGATGAAGGCTTTTACTTTTGTTCTTATCATTCTTTTTATTTTCTCCATTGGCAATGAAAGATTATTAAAAGTATCAGAGGCAAGATTGTGTTATGCCGAGACTGAAGGACAGTGTAATCCAACAACACATGACGAATGCAACAGGGACTGTAAGAGAATATATGGAGAGCATGCAACTGGTCATTGCGATATTACAAGAGATTGTGTTTGCCGTTTCCCATGTTAAATTTGTAGTCCTAAATTTACAGCATTGTCCCTTTTGAATAAATAATTAAATAATGAGACTACAACATATTTATATACAATCTTATTCCGTCC
>Peanut_newGene_1282	Peanut_newGene_1282.1
GCACCTAAGAAGATGAAGGCCTTTACCTGTGTTTTGGTCATTCTACTTGTTTTTTCCATAGGAAATGAAAGGCTAATGAAAGTAACAGAGGCAGCCTCAAACCATTGTACACAGACACTCGCAGATGCGAAATGTGTAGCGAGTCGGTGCGATGATTCATGCAAAAAACGTTATGGAAATCTAGCAAGTGGATTTTGCACTCGCGACAAATGTATTTGTATACACTCACTTCCATGTCAGGATTTATAGTCCTATGTTTGCA
>Peanut_newGene_1287	Peanut_newGene_1287.1
CATCGCTGCATGAGCTTCATCATCGTAGTGACAGCTCCACCGCATCTTCATCCCTGCATCCTCATGCCAAAGGATTGTTCTGTTCTTTAACTGCTCTCTCTTCTCTCCTCTTCTCCAAGGGGCAATTTTCTCCGAAGCTTCAGAGGAAAAAAACAGAAGAACCATCATAAAAGAAACACAGAGTGTACCTTAAAAACAAAGCAGAAGGAGTCTTTTGCTGGCATTGAAACAGTTTATTTCAGAAACAACCACACGCACACCAAGTGTTTGTTGGTTTGATACAAAGGTTATTATTTAACTCTTCAAACATCACTGCTCCCCCTTCCCCTTTTTGGTTCTTTTTCATTTGTTTGGTCCACAAAGAAATAATTTTTAACGCATAAGAATTTGATAAAAAAT…
>Peanut_newGene_1302	Peanut_newGene_1302.1
CTGAAATCGCTCTCCATCAGCCACCGCAAGGGAACCAAAAACTACACCAACCCCATTTTGATTCTTTCGGATTTTGTTCGGAAAAGAACTTCCTAAACTCTAAACCAAACCAAAATCGATTAAAGTTTATTGTTTGAGATATGTTAATCCTCCTAAACCCAAACCAATAATCATCCATAGGTGGTTCAAATATCAAACACATGGTGGGCGTCTCACCACAACATCATGCTCACAATACTTAGGCTGAACCAAAAGAAATTCGTCACTAGAACTCTACACAACACAACTTGGTATCTATGTTCCACCCTCAAATTTTGCACTCAACCTCAATCTCAATCATCTTTGCAAACAACAGAAGTTGACAACCTCATACTCCTCAATAAGACAAGCTCATACCCA…
>Peanut_newGene_1305	Peanut_newGene_1305.1
TAGATTTTGAACATCATGAAAAAGTATTACATAAAGAATAACGACCAACCTAATTCTTCCTCTTCCTCCGCCTCCTCCTCGGCCATCAGGATTTATGTGACATACGGCGAGTGCCAAAGGAACCAAGCCGAGTGGCTCGGAGGACACGCGGTTGACGGTTGTCAAGCTTTCATGCCAAGCGGAGAAGAAGGAACACCAGAAGCTCTCTCATGTGCCGCTTGTAACTGCCATAGGAGCTTCCACAAGCTTGAAGTGCATGCTGAAGGCGAAGACAGTAATGACCTTCCTCCACCACAAAGGAGCTAGGGCTTAAGTAGTAAGGACTAAAATAAAATTTCATGTGTTAAAGAATAAAAAATCCAACGTAGCCTATGATGTTATGTTGTGATGAACCTATCT…
>Peanut_newGene_1308	Peanut_newGene_1308.1
TCTCATCAAAGTATTAATAGCCAAAGTCAGTTTCCGAAAATCACTCTACCCAACATCACACATCACACTTGTTCAATTCAAAACCCCTTCAAACTCTAACAACTCTCTTCTCTTATATTCTCTGTTTATATTTGTTGCATATCATTTCCACACTTTCTAAATTCTAAGCATAGATTCGCCAATTGATTCCACACCCATTTCTCAAAATCATCCAAAGAATAATGGGTCACTCTTGCTTTCTCCTGCTTCTCCTTTCATCTCTCCTCTTTCTCTCTTTTGTTGGCCATGGATTTGGTAGGGTGGCACTGATGGAGACTCATGAGCATACACATTCTACTCATTCAACACAGGAATATGGTACAACAATGAGGGCATCTTTTGAGGTTGAGGATTATGCTG…
>Peanut_newGene_1314	Peanut_newGene_1314.1
ATACGATTGCACCTCTACACCAAAAAAGGAAAAAGCCCAACTTCTACATCTATTTGTGCGGCCCAATTATTTTTCATTTATCCAATTTAATTATTTACGTTTGTTTAATTAATTCCGTAAAGATAAACGTTGATGCCTGTATAAATGACGTAAGACCCATTTCCTCCACACGCGGCAGCCTCATGCTCCGACACCTATTGACAGCATGACATGGTGATTTTCACAACCAGCACCATAGAATTTTCATAATTACAAAGAGGCAGACACATCACAAACAAATAATTACAAAAAATGCAGACGCAAGACACATTTATAGGGTGGTTGTGTGTGAATTCCTTAATGTATGGGGAAAAGACAAAAAAAACAAATAAGCATTGAAGACTCTGATGGTAAGGCATT…
>Peanut_newGene_1317	Peanut_newGene_1317.1
TGGATTTCTTCCCTCCCCTCCATACCCGGGTTTTGGGCAATATAAATACACAACAGCATAGCATGTATAGCCATGCAAAAAGAGAATATAAGTGACAACATATATATACACTACAATAGTAGTTTCCATTAATCACCATGAAAGCCATTTTCATTGCATTCCTACTCTTGGCTTCCATGGCCTTCCTACCCTCTTCAACTCTAGCAGCCCGTGAACTGGTAGCGGTTAAAGTAATGAATGCAGGAGAGAAAGCAGCAGTATACGTAGTTGACCCTAATAACCCAAAGGGGCCTGCTATTAAATGTCCACCAAATACGCCTTATGAAAGGTGCCTCAACCCGCCAGCTCCAAAATGTAACAAACTGTACAATCGTGGCTGCAAATGATGACCATCAATGA…
>Peanut_newGene_1322	Peanut_newGene_1322.1
TGACGTCACGGAGTTGCCGTCGCCGATATCGTTACTCCGTTCGACCTCTCCTCCTTCATTGCTACTCCGTTCAACTCCTGCATAGCCGCCTCTTTCTCTGCCGCCTGCGCGTTGTTTTCAGCGTCTCTGCTCGCTCGGGTCACCGGCATCTCTGCCACTCGCCTCTCCGGCCACGTCTTTACGCGCCTCTTCTCTCCGTCTCTGCCCACCCTAGTTTGCAAAGCAACAGCAGACCACTTTTTGTAGCAGAAGTTTTGTTAAAAGAGCAGGAGAAGCAGCCAAAAGAACAATGAATATACTCTCAGTTGCACGTAGGTCATTGAATTTTGTTTCGATAAATCAGTTTCGTCAGACACATTTGCTCAGAAGACTTTCTACATGGCAGTTTACTGGTACTTT…
>Peanut_newGene_1334	Peanut_newGene_1334.1
GGCTTCCATTATAAACGTAATGAAAAACTTACCTTGCAAGTGGTCCAATAACGAACAAGGCAGTGACTTTTCGATTGGAAGTAAGAGGTGGAGAGTGGGAGAATTATACGCAGATGGATGGAGAACCATGGAGCAGCCTTTGAGCAGGGACTTCTCAACAGTCGTGGAAATAAAGAGAGCGCCTTTTTAGTCACTTATGGCCAGTGGTGAGTAACTCTGATGTTTTAACGTTCTACTGCAGCAAGGATTCATGCTCGGAGTGTGTATAATTAACCATAGGTATTGGCTTGGTTCTCCATTAAGTTTGAAACCACTTCTGCCAACTCTGTATCTAGAAACTAAGAGCATCTATAAATCAAAGTTATGTTTCTGATTTACGAGAATAAATTCACAATCTCA…
>Peanut_newGene_1338	Peanut_newGene_1338.3
TGGAGTTCCAAGATTTGTTTTGATTGCTCGTTTAGCAAAAATCAAGGTGTTTAATGGAAGTGAGGTAAGTGATGGATGATCTCTCCTAATCTTTAATACCTTCATGTATCAGATATAACGTATTCATATCTTATTACCTTCCAGGTTACACCTCGTGAAAGGAAGGACTCTGAGATTAGGTATGTTCGACTTGTGATCTCGAGGTTGCATGCTAATGCTGAAGAAATCAAACAGCATCCCAGGTTTTCTGAGCTTAAGAGTTTGTATGGAATTGAGGATGAAAGACCGTCAACTGGAGCTTCAGGCCCACAAACCATAGGCTCAGGGTTCTTGTCTATCACTTTGAAATGTGTTGGAGCATCCATGGGTGAGAAGCAACCATTGACAAAGAAGCTGCCA…
>Peanut_newGene_1339	Peanut_newGene_1339.1
ATTGGGAGCAGGTTGAATTGCTTAGACAATCATTGACAGCTATTGAAGAGCTGCATCTTATCGGAAACAATATAAGCAGACCTATGTCATCCTCCTTTGTTCAAGGATTTAATTCTTTGCGTCTATTGAATTTGGATGATAATTGTATAGCTGAATGGGATGAAGTCATGAAGCTTTCTCAACTAAGATGGTTGGTTATGGCAAAATGTTTTCAATTCTATAATACATGCTTAACTCCAAGTTGGACTGATACCATTTTAACCACATTTGACTTTAGTAATCATTTATTTATTTATCTAACCACTTAATATTTAAGCTAACTACTTATTTTAAGATATTAGCACCAGAGTGAAATCTTATGATTAAAGTGAAATGTGGTTAAAGTCATAGGTGGTATCT…
>Peanut_newGene_1340	Peanut_newGene_1340.1
CAAATATGAAAGAACTTGACCTGACTGGGAACCTGCTTTCGGATTGGAAGGTACGTAACCTGGTTTTTTTCCACAATTGTATCTTGACTAAGGCTGTAGCATTGAGTCTGCTAATTTTTAACACACCATTCATATCTTACCCAGAGCTGTTATTCATGAAAATTACACATGGTCTTTTGCTGGTATTTGGTAAACTCAAATATATTTAGTCTGATTCTTGTGTTAAGAAATTTTCTTTATGTTTAAATATTCAGATTGTGGTTAGAAGATTTGTGACATATGTTATTTTCTTAGCACCACCTCAATTTCTATACTATTAACAGCTCTTAAATGGTGTAATTGTTGCCTTGAGTTGTAAACTTATGACCTCATGCAAACTGCCCAAGTCCCTCACACTAA…
>Peanut_newGene_1343	Peanut_newGene_1343.4
AAATATCTATAAATATGGAAAACCCAGTTGTGGATATGCTACTATGTGGGAGTAGGATATTTTTTTTAATTAAAAATGTATATTGTTTGCAAGAAGATAATATACACCAAGATAAATGAAGAAAAACCATAAATGAGTCAAGCACACTATTCTCAAAAATCTGATAAGAACTGGTAGAACCGCTCCACAAAAGCTAGCTATTGTGGTTAGAGAGCACAAGGCTATATAAATCCCTACTTCTGAAATGGGACTCAAGTTGCATATCTTGCATATGAATCCTAACATAATTTCACAGCCCTAGTGCCCCTACAGGATGGTTGTGCACTAAGCCAGGGGAGTTGTCCTAGTGGAAGACTATGATGTTGTTAGACACCACTCACATTGCCTGATTTCAGTTTA…
>Peanut_newGene_1357	Peanut_newGene_1357.2
CTTACTTTCCCTCCTAAACAAAAAAACAGGAAAGGAAACGCGAGCAATAATTGATTCATCACCTTCCTCACTACTATTAGCCTATTACTTAGAAACAGAACTCAATTCCTACCATTTTAGAATGAAAATCCTAACCCCAACCCTAGTTCAACTCCCCCAATTTCACGACATTGACTCGCGTTCTGCGTTCTTCTCTCTCGCCGTCGTGGTGTTCTTCACTGCTCTGCTCTGCTCGTGTCATGTGCTTCTACTCGCATCGTGCTCTGCTCCGCCATGTTCGATCTTCAGCTCGCGCCATTCTGAAACATTCGCTTTGCTCCGCCGTGGTGTCGTTCACATCCTCTCAAGTCTCTCAGATCTATGATTTGGACAGCACAGGCTTTGTAATTCTCTTGCAGT…
>Peanut_newGene_1360	Peanut_newGene_1360.1
TTTTGATCCAAACTGGCATAACACAAAGCAATCCATGGCCATGGCATTCTTTGAGACTATCCTCAACCCTTTCTTCTTCTTCTTCTTCAAGTTCCAGAGGCAATTCTTTCATTGTCTCATACCTCGTCGGAACTTGTGGGTTCTCACCAGAACGCGCAGTTTACATTTCCAAGCGCTTCAGCTTCGAAACAAGCGATAAACCAGATGCAGTGATTTCGTTCATCAAGAATATCGGTCTCTCCCAAACGACGACGTTGAGAGTCATCCAATCTCTGCCCCAATTACTCGTAGCAAACCCTAAAACTCTTCAGCCAAAAATCGATTTTTTCAAGTCCAAAGGGTTTTCCTCCTCTGACATATGCAGGATCATAGAAGGCTGCCCTTCAATCCTCACCCGAA…
>Peanut_newGene_1361	Peanut_newGene_1361.1
TTTTAAAAGCATGCACTAACAGAGATACAAAGACTCCATCACAATCACAAGAGCCAGCATTCCAGCACGGATCTCTGAGCATGGCTCCAACGAACAAGAACTACGAAACACTTGAAATCGAATCTATCAATAACATTGAAGGAGAAGAAGAAGCAGAATCAGAAATGGGCAACAAGAAAGCACAAGAAGAGCTGCATGCAACAACAGATCAAAAATCCATAAGAAACAAGAGGTACATGCCCCTTCTGGTTCTGAATTACTTTCTCCTCTTTGTGGGTTCAGTCTCTTCAAGCATGCT
>Peanut_newGene_1367	Peanut_newGene_1367.1
AAACCCTATGAGGTTTTCTATCTTCTCCTTACTCTGCCCTAGGAAGCTCTGTTCAGGAGCCCTGTTTTCCTGCGACTTTGGTTCGTCGCCGTTCATACCTCTTAGCCATTTTCCAGCCGAGCCTCAAATGGAAGATCTCCTATCAATCAATCAGGGTTAACGCAGATTCAATTGTCTAGGGTTTGAGAAATTCTAAATTGTGCAAAATGTGATCATTTTTTGTATCTGTTCCATGCTTAAGCGAGATTGTATTGTCTAGGGTTTTAGAAATTTCTAATTGTGCAAATTGTGATCATGTTTGGTATCTGTTTGATGGTTAGGCGAAATTTTATTATGTAGGGTTTGTGAAATTCCTAATTTTGCAAATTTGGATCCTTTTTGGTATCTGTTCTACTTTTA…
>Peanut_newGene_1370	Peanut_newGene_1370.2
GCTGAACATAAGAAAGAAGAGAGAAAATGAATTCTTTCAATGTGGCAAATTCTCTATTTTTAATGACAGGAGAGATCACACAGTTGACATCTGCAGCATCAACCAGATAAACAAGAAAATGATGTCCTAGACCTCTTGTCATTCCAGTTTCTTTGACCGCAGAACCAGTCTGAAAAGGACAACAAGGTGCCAATTGGAGTGCAAGGGATCCGTATCTGACCTGTAAGATATATAAATGATAATGGGAGCAGGCACTTGATTACATGCTAATTGCTGCTTTAAGCTTGAAATTAAGAAAGTCATGCTCTGCATTTGTGGAGATCAAATGTAAGTACTTTTTCTGGAGACAATTTTTTTATTTTAAAGTGGATTGAGTTGTATTTTCAGTTTGTTCTTTCA…
>Peanut_newGene_1372	Peanut_newGene_1372.1
TGAGGCAGGGATATATCCTGACTGAAGAAGAAGAATTTAATGCTCCTTGTGTGCAATGTTCGGTTGTGCAGCCACTCGGGTACGATGGACCGGTTCTTTGTGGTTCATTTGTGGTGGAATTCTGAGCTTGGTCTAGCTCCATCTGTTCTCCGGCCTTAGAATGTCCATGAAGGAAAGTGCAGCATTGATATTCTCTTCGAATGGCATTAGCAGGAGTGGGTGGGTCTCACTAGTAACCGAGCTTGGCAATAATACCTGCTCGTGATTTTTCCCACTTCAGGGGAGAGAGTTCAAGCATAGGGAAGGGTTGGGGATCGGGTTTCCGGCTGGGTGGGACTTATCGGGTTCGGGTTCTTCTGTGTAGGACTCGGCTCATGTCTCCAAAAAAAAGCGTGAATC…
>Peanut_newGene_1373	Peanut_newGene_1373.1
TTAAAAGAGATGAATATAAGACCTAGCTTATGGCCTCAACAACGAGCTAATGGAAAGACATTTCTCCCTCCTTCTTATTTCTCAATGTCTTCTGCTGAAAAGAAGTTATTTTATGAAGTACTAGAAAATGTTAAGCTTCCACATGGCTATGCATCTAATGTCTCTCGTTGCATTCGGAAACAGAAAATATCAGGGCTAAAATCTCATGATTGCCATGTTATAATGCAAGAACTTCTTCCACTTGCTTTACGAGGAACAATAGATAAAAAGATGAGCTTTGTTTTGATCGAATTGTGCACATTCTTTCGAGGGATATGTAGTAAAAATCTTGAAGTGGAAAACTTAACACTACTTGAGGAGAAGATTGCCTTAATATTGTGTGACATGGAGAAGCTGTTC…
>Peanut_newGene_1375	Peanut_newGene_1375.12
GGGAATAAACAGAAAAGGGGGAAGAGGGACAGAGGAAGGAGACGCGGCGAAGAGAGGAGGAGAGGGCCGTTTCGGTCATCACTGAAGCCTCCAGCGCCGCCGTTGCTGCTGTAGACCTCGTCCCAGCCGCGAAGAAGAGGAGGAGGGGCGCTGTTTGCGCCTTTGCCGCTGCCCTGCGTTGTCACCGTCGAGAAGCAGAACGAGATAGAGAGAGACGCGAAGGAGAATGGCGGAGGCCACCACCGCTGCCATTGCCGTCGCTGGGATCGTCGGAAGCTGCCGTGACCACCACTGTACTCCACGCTGGAATCACTGATGGAGGTGTCTTTGCAGCCTTTATTTTGGTTTAGGTCCTGTGCTCCTTTAACTTGTTCCACTTCCACTTTTACTCTACTATTA…
>Peanut_newGene_1382	Peanut_newGene_1382.1
CACAATTTCACATGTAAGCTCCACAACCTAATTAGATCTTTGGTGGTTTGTGACTTGTGAGGATTACTAGTTACCGAAAACATAGTTTTTCAATTTTAATTTTAATTATCAACCTTTTAAATCAAAGATCTGTTGGGCGTGAGGTGTAGTGCCTCACTTTGGAGTTCTCTCACAAAACAAAAGAATAACAAAAATTAGTTAGTTAGTTAGTTAAACATGGGTAACGCTTTTGGCATGAAGAAGACGACGAAGGTGATGAAGATCGACGGTGAGACATTTAAGTTAAAGACTCCGGTGAAAGCTGGGGAAGTCCTTAAGAACCACCCTGGCCTTGTCCTCCTTGAATCGGAGAACGTGAAGCACTACGGCACAAGGGCCAAACCCTTGGAGCCGAACAAG…
>Peanut_newGene_1385	Peanut_newGene_1385.3
TCAGTTGGTTGAAAGTTGAAGCTCGTGTACGGCGCTACTGCAGTGACCTCTCCCTCTTGCGTTCTCGGACGATCTCCTCCAACGACGATCTTCTCAGATGACATCTCCTCCCGCGACAGCTTCTCTAGCGGCGATTTTGTCCGGTGACGGCCCCTCCAGCTTCCTCTCCTTGCCGTCCCCTATGTCTTCTCCGCCAAAATCTCAGTGCCTCCCTTTCGTTCTGGATCAGTAAGGTCGGCTTGCTTCTTTTAGGTCGTATGCAAGGATTCATCGCGAGTGGTTCCACCGTTTGCGTATCAAGATCAACAGCAACAGCAAGAATAAGATGAGGCCGGCACTGGATTTTGAATCGTAGTGGAGTAGTAGTAGCGAGTGTACTTCTCGACAGTCCACATCCGC…
>Peanut_newGene_1389	Peanut_newGene_1389.2
CTTATTTTAGTTCTGTCACTTTGCTTCAAAATTGTTGTTGTAACTCGTATTGGTTTTGGGACTATTATGGCTGCTGCTGGTTTTGTTCAAGGCTACTGCTGCTGTGAGAAAGGAAAAAGAAATTTGTCGCGATTAAGGAATTCTTCGAGTTCCGGTTATTTGAGCAATGGTGTCTGGATTCAGAAGCTACTATGGTGGGGATCATGCTCCCACTTTGAGGCCTAATTAACAAGAAGAGGTTGGCAGCAATCTTGTGGCATAATGGTACTATAGGATGGAACAGTTTTGAAGAAAGAGTAAAGAAGATGATCCACGAAGGTCAGAAAGTTACAATGAGGAAGTTTGGTAAAAGTATTTACAGACAATCAAGGTCTCCCACGTGCATGTGTAGACAACCTT…
>Peanut_newGene_1396	Peanut_newGene_1396.1
GGTAAGGGGACTGATAAAGGAAGAGATAGAAACAACCCAGAGAAATCCACACTCACAGAGGTAAAGGGACTGATGAAGGAAGAGATAGAAACAACTCGGAGAAACGAAGATTAGGATATGAAGTTTATAGACTTGGAGGGTCAAGAGATAGAGATGCAACAGAATTAATGGAGTTAGTCTATAGACGTCAAGGTTGGCTAGAATAGCTTAAGATTGAGTTGGAGCGACAACGCGAATCTAAGCGGTCTCTACGAAGAGAGGTACAACGACATAGCGAGTTGGAGGAAAAACTAGAAAGATTGGACTCCGATCTCAAGGGTAAGAGATCTCCAACTCATCAGGAAACCACACCCTTGGAAAAGTGAAGACCCATTCTTAAAAGAAATTATGTGAGCAAAA…
>Peanut_newGene_1400	Peanut_newGene_1400.1
CCTAACCCCAGCTTCTAAACGCAGCCCCACCCCCTTTCTTCCCAAACCTAATACTGAAACGGAATCAGACAGGGAGAGAGAGAGGAAATCAGGGTGTGATCCAAGCAGCCACCGTTCAGTCGCCAGAGACGCCGCTGGGGGTTCTTCGCCGTCACTATCGTCCTCATCCACACGAGCTGCAGCGCTGCGCGGCCCAGCCATCGTGACCTCCGTGGAGTCCGCGTCGCTGTCGCCTCGGCTGCTTCCACCGCCGCTGGATCCGTCGCGCGCGCCGTTGTCTGAGGAGCCACCGTCGTCCTTGCTCTTTGTCTCCCTTAGAGCCGTCACCGTCGCTGGAGCCAGCCGCCTTCGTCGCCGTTCATCTTTGCCGTCGCCCTTATCGCCGCTCTGTGGAGGCCG…
>Peanut_newGene_1418	Peanut_newGene_1418.1
GATCAGCCAAAATTGAATGCTTCCATTGGTTTGCTGATAAAAAAAATTGGTTTGCTGATCAGCCGAAATTGAATGTTATGAACTTGAACTTGAAATACTCATTGTTCAGTAGGTAGTTTAGAGCAAAGTTTTACAATAAAAGGAGATAATTAACAGAGGAGACATACTCACACTGTAGAGAGACCTGCTATTAAGAACATTAGACTCATCTTATTTTTACTTATTGCGGTTAAGGGTGCTTTATTTTTTTTAGCAGCAAAGTGTTAAGAATGATCATTACTTTGCTTTGCATTTGAATGCGAAGATGTGTTTGTACATTACAATACTGTTTGACAGTGATTACTATCAGCATTATAGTAATAGCTGTTTGTTTTTTTACTATTAACTAGATTATATTTG…
>Peanut_newGene_1419	Peanut_newGene_1419.3
CCGCGACGATCTCCGATCCTCTGGCGTTTACTGACGACCTTCTCTGTGACATCTCCTCCGGCATCGATCTCCATCGACGACATCTCCTACAGCGGCGATTTCATCCGGTGTCGTCTCCTGCAGCTTCCTCTCCTTGTCGTCCTCTGTGTCTTCTCCGCCAAAATCGTCAACGCCTTCCTGTTCGACGATCCAGATCCGCCGCTAGGGATTGCATTCCGCAGGAGAGGAATTCCTTTGTCAACTTCCAAGCCAAAACCGGTGTAGAGAATGCAGAACTGTGTCTGGTGTTGCTGGACCGTTGGATACTCTTGATAAAGTTAAGGTAATGACTAGTTTTGATGCTATGCTTATTGGATATTCTAGAATTTTGAACTTTTCTCAATGAAATGTATCACTTTC…
>Peanut_newGene_1422	Peanut_newGene_1422.6
ATTTTGACTCAATTTGTGGAGGTTATAGTGAAGTGCATAAGTTACTACATCAATTACAGTTTTCAAATATATGAATGCCTTAAGAAGTTTTAGTAAATAAGTGCGTGAGTTAATAATTGTCTAATGGTTTGATTATTTTTGTTGAGTCTTGGATTAATTCAGTTCCAATAATTTTTTATAATTAGTGGAGTTGTAAGAAAAATTGATTCTTTGATTATTAGAGGGATGCATGAGGTACACTGCTTGAAACTCTGTTTATTTATGATTATTAGGTTGTATGTTTGCTGGTATTGATGAATGTATTGGCTGGTGTTTAATTGGGAATGGATTAGAGTTATAGAAAAATTGAATTGGTTAGCTTGTAAAGTTAGGAAGTGGGGGTTTAGAGGCTACATTAGG…
>Peanut_newGene_1423	Peanut_newGene_1423.8
CCTAAAGAGAAACTCCTCAAGCTTTTTCCACCACCGCAGGCCTTACAATCGCCGACAATCGTCCATCATCCTTCACTCATTCACACTCATTCAAATTGATCGCTATTCATGTTTCCATCCTCCCCCCTCAGATCCGCATCGCTATTTTTGTTCGTTCGTGTCTCAGATCTCCATCGCTAGGTTCGGTTCCTATCTTAAAAGCATCATTAATGGTGGCAGGAAAGTCCAATATGGAGGTTAAGGAGGTTCTTGATCAGATGCTCACTCATTTGGCTCTCTGCGACGATTGCAAACTTGAGCCCTTACTCTCCAATCTTCTCCCTATCTGCATATCTTCACTCTCCTTAAACTCCACCGCTGTTTGCAACAAGGATTTCAAATTTGCGGTTGCTAGCAACT…
>Peanut_newGene_1427	Peanut_newGene_1427.1
TCACCAGTTGCGGATATCAATTTCATCAAAAATATCTTTGTCCCTCCAAAAAGATGATGCTGCTGATGATAATGAGCCTCCATGCATGTTATCTCCTATTAATGGTGATGACGCAACAAATAATAATACTAATACTAGTGCATTAATGTTCAATAATCCAGGGGTTGGATTAATAATGGAGAGTAATCCTCATAAACCTGAAGCCCAAACAACAATTCAGAGGGGAACCCATAATATGGACGCTCCATGTTCTAGGAAACAACCAAACTTCACAACAAAAACAAGAAGCAATGGAGGCATGACGAAGTTGTTGATAAAATTTAGAGGTATAAATATTGGGGCCATATTAGCATCTCTTATAAAGCCACTATACCAACCCAACAACCATAATGGACATAA…
>Peanut_newGene_1431	Peanut_newGene_1431.1
ATGGAGCCTCAGTTGAACCAATGGGATGATGAAGATATGGTTTCAGGCTCCAGCAGCAAGCAGAGTTACAATTTTCAAGCTTCCAATGTTAATCCTAAGAGAGAAAAGTACCTCAGATACCGGACCAGACTGAATGCTGCAGAGTATGCTTGTTTTAGCTGTGTAATTTAGTTTTTATATATGTTTCAAAAATGCCAACCTATCCTAGATTCAAACCTTATGTTTTCTTGGCTTCTTTCAT
>Peanut_newGene_1439	Peanut_newGene_1439.4
TTTTAAGATGTCTCCTTTATGCTTATCTTCCTAATAATTAGAATCTTAATGGTGGAAAGCAATCATATGTCTAGCTTGGCTAATAATTAGAACCCTAATAGTTTCTTTTATATCTTTCATTATACAACTTGTTAGTTCTCTTAATTCATCACTGTTCTATTGTGGCATGTCACTGTTTAGGAAAAAAATTATGTGGAACAAGACATGCAGATTTTGGAAATTTAAGTTAAACATATTTAGATTAAAACAGTACATGATTATTTAATTACCATTACTTGTGCTATACAAATTATTAATTCTGTTTTTTATATGTTCTCAATTCAGCAATATGGTGACATTAGGTGACAACAATATGTTTACATGCAGTATATAAAGTCCTAAATGACCACATGGATATTC…
>Peanut_newGene_1440	Peanut_newGene_1440.1
GAGGCAGCAGCCTCATCCTCCCTCAGCTTAGCAACACACACACTCGAGCAGCAGCAGAAGCCTCCAACCCCTTTCTTCCCCACAAAACACAAACACACACCCACAGAGGAGAGTGCGCCGGCCAGGAGGGTTGCTGTCGCCGCCAACTGGTCGCCGTCAATACCATCACTGGCATCGTTGCCAGTTGTGCCACCAGAGGAAGAAATCGGGCAGAAAGGGGGAAACAAGGGAAGGGACCGCGGAGAAGGAAAGAGAGAGAGAAAGCTCGCGTTGGAGAGAGAGAGGGAGCTCGTGCCTCACCGCCGGCACCCATGGAGCCACGAGATCGGTCGTCGCCGACCCTTCTTGCACCACGTCAAAACAGAAATGCGAACGGAAGGGAGTGCGAGCCACCACCAC…
>Peanut_newGene_1449	Peanut_newGene_1449.2
GTGGGTTATGTATAGGGTCTTCATATGCAACGTTTGCTCCGCTGTTCGTCGCATCTTCGAAGTGCATATTAGCTTCCTCAGGAAAGTTTCTTTGCTGATTGTTTAAATTGTTATGATTTCATGATAAGTTTTTTCGTGGATGTTGGCATTAGAAATCTGGTAAGACAAGTTAAACAGCTTGCTCTTCTTGCTTGACACACTGGTAAGTAAGTAGAATGCATTTCAACTGTCTTGAAGAGGAGGGCATGAGTGTTGGGTTCTTTAAGGTGTTATATATGCAATGTTTGTTCATCTGAGCTCTGCCTCTCCCATTCAGTCATCATTCATTTATGTCGTTCTTCTGGCACTTGCTACAGCTGTGGTGGGGATGAGCCATATGGCCAGGGATTGCAACCAAGG…
>Peanut_newGene_1452	Peanut_newGene_1452.1
ACTCAATTGATCCCTTTGTTTTTCTATTCGCAAACTGAGGTTTGAATCATTGGAAAAACTCTTTTGTGTGTGTATGGCCGGCATAGACTTGGGTTCAGCATCACACTTTGTTCATCACCTTCAACGCCCTGACCTTGAAGATGATGATAATAACCAAGACCAAGACCCGAGCAACAACCATCACGAGGGTCTTGACCTAGTTTCGCCAAATCAAGGCCCTGGTGATGTTGTTGCTCGTAGGCCAAGAGGGAGACCTCCGGGTTCCAAGAACAAGCCTAAGCCACCGGTGATCATCACAAGGGAGAGTGCAAACACTCTTAGGGCACACATCCTTGAAGTTAGTAGTGGTTGCGATGTGTTTGACTCTGTGGCCACTTATGCAAGAAAGCGTCAACGGGG…
>Peanut_newGene_1453	Peanut_newGene_1453.1
GTTTCTTTGTGTTGGTTCTTGTTTTGATCCTATTATTAGTTGTCTGTGTGTCATTTCAAGGATATCAGAATGTGGGAATGCCGCCTATCAAGCTGTTGGATGGATATACACATCCTTGGCCCCAAGTTAAGAGGTTAATTCAGAAAAGAATGCCCTTGTGTCAGTAAAATGGCTTCATGGTGTTCTTTTTCTAACTAGCACATGTGTTTAGCCAAAGAAGAAAGTATCCAGCAGTTCGTCTTCCCATGAAACTGTGTTCTCTACACCTAATAAGGTTCTGTTATATATTTTTTATTGGAAATTGGAAATTTTGGAATCATTATCAAGGTATGAGGTTTCAGTCTCATCCTTTTCATGAATGTTGATGTGATTGACTGATTTTTATTCATGTTGCTCTAT…
>Peanut_newGene_1463	Peanut_newGene_1463.1
CCACAATAACCACATCTTTTTGGAGTTTGCCTCCATCATCCTGTAAGGCAAGAGCTAATTGAGCTTATTAGGACAATGGGGAGGAGGAGATTCGCTACTGCCCAAGTGCTCGTCATCTTAAGTGCGGTGGTGACGGCGCTTAGCCAGGGTGCTGTGAGAGATTATGGAGAGAAGATCAACACTGAACTACCGCCGACAGGAAGGAACATCACCTATCGATGCATTGGTCTTCAATGCATAGCTTCCGACAGCAACAATAATCATTTTGAAGCTGCTGATTCTTTCATGGATCCGCATCAATTTGACACTATGCTTTACAGAGTAACTAATAACGGAAACGCAAGACAACAAGCACTTGAATGTCCACCGAACACGCCGTATGAATCTTGCCTTCCCAAA…
>Peanut_newGene_1475	Peanut_newGene_1475.1
AAACAATTACGATGGGCAAGGGAGGAGGTAATGGGAATTTCGAAAATTACACTGCCCAGGAACACCGTACACGACCCCATAGTTCGTCTCTGTAAACACCAAAACAAACCCTAATTCGTGATCTTTCGCAATTCTTTGTTCCCTTCTCATCCACCACTATCTTACGAAGTCAAAATCATATCTTTTCTGCAATTCCCAAATATCAGTTGCGATTAGGCAAACAAATTTCAAATTTTGCCTTCTACCCCCCACCCCCACACTGTTCTGTCTTGCATCTCGATTGGTTGTTTTCCTTTTCAGATCAGGTTCAGATTTTTCTTCTGCCCCAGCTTTGGAGGATCCCTCAGCTTCCCTGAGCGGATGGTTAAGTGTAAAGTTGTAAACATTTGTAAGATAGCG…
>Peanut_newGene_1478	Peanut_newGene_1478.1
GGTAAAAATTTTCTTGCAAGTAAACCCGCATAGAGCATCACAACCAATTAGGGTTTTTTCAAATTCTCGTTCATCTTCGATTTCATACAGTGGTTTGGTGTAGGAGGTTGTCCTGTTCTAATGCGTGGTTAGAATTTCGGAAATGAGTGATGCGAAAGAAAATGAGGAAGTTGGCCAGGGTGTGCCCTCGGCTATGGAAGAAAACCAACACTTAGATGATGCCAATTTTCAAATTCAACCTGATGCTTCTTCTACTCCTGCTCCAGTAGAGGAAAGTCCAAATCACGTCAAAAACATATCGAAGGAGCCGCCTGTTGAGTCTAAGGCGGAGGCATCTGCTGAGTCTAAGACAGAGCCACCTGCTGAGTCTACGGCTGAGCCACCTGCTGAGGTTATGGC…
>Peanut_newGene_1479	Peanut_newGene_1479.3
AGAATAAGACTGATGAAAATCAAGCTGCTGCAACTGCAGACAATGGGAATGAAAACTCAAGTCACATGCTTTTCTTGGACGCAGACCATTGTTATGATGGGAATGAGTCAGGGACGGAGGAAGAGCAATCAGCATTCATGAAGGAGCTTGAAAATTTCTTTAAGGAGAGGAGCATGGAATTCAAACCTCCCAAGTTTTATGGAGAAGGACTTAATTGCCTTAAGTTGTGGAGAGCTGTAACAAGATTGGGTGGTTATGACAAGGTATTCTTCANGGGGTATGGCAGAGGATTTATATAATTTTATGTAGCTGACTTTGGATGAATGAACATATGTAGATATCCACATTAACAGTAGGGTCTTCTGGTTAAACATGTTGGCACACTCCATCTGATCCGTG…
>Peanut_newGene_1481	Peanut_newGene_1481.1
AGAAAAACAGTGTGACGAATTATTTGAAAAAGTTGTTCATGATTGGAAGAAATAGAATGCTCTCTAAACCCTAAGGCGACAGCAGAGGAAAAATCTTCTCAAGAAAAGGACCAACTATAGAGAAGTGTCAAGAAAGCTAAACCCAATGGGGATGAAATCCTGCCAGATGCAGAGGAGGTTCCACGCAACAAAAAAGGTGTCACTACGATGGTGATGGATAATGTTGGTGAACGGCAGAGCCAACCCCCTCCTGCACTGAGGAGTCAATCGAATTTTGTACCGACGGGTGAGGTAGCATCAGGAACGACAAGAAGCTGTTCTTATAAGGATAGTCTGATGTTAGGGGGAGCCGAGATGGATTTATTTCCGGTAGAGATTGTTCAATTGGTGGCTGAGGAT…
>Peanut_newGene_1487	Peanut_newGene_1487.1
CGTCATTTTCTCCCTTCCAAAATCCTAGCGCGTTTTCTCCATAAGTTGCATAGCCATTTTAGAACGCTCTAGGCTTCACTCCGGAAAGTTCATCGTTGTGCTGCTCCAGTGCACCGTCGGATAATTCGTCTCGGCATGGAAGGTTTTTCAGAGAGCTGTTGTGGCGCTCCAGGAGGATTCTTGGAACACTTTCGGCATCAAAATGCATCAGGTTCCCTCACTTCCCGTCTCATGGTCACTGAAAGCAAGGTGAAAGCGCTGTGCATTCCTTTGTTGGGGTCGGAAGAGTAACTTCACTGTATGATTTAAAAATGGCAATGTGAATGAGGGTGCTGATGAGTTTGAAGAACTGGGAAGCCCAAAATGCAAATGATGATGCTAGAAATTTGGTTGAGCCTA…
>Peanut_newGene_1513	Peanut_newGene_1513.2
CCTCAACTTCACAGGAATATGGAGTATGAGTCTATGACCTGATTGATGAGATGTTGAGTGTCTCTTGTGGTGGTGAAGCTCTCTGTCTGTCATGATCTGAAACCAATGGCTGACTCGACGAGTCAAAGAGATTTCGGCGATTCGAATTTTTGTGTGGTTTTCCAGAGTCAATTTCAAGAATCCCCGCGCTTCTTTCATCATCCATGCTACAAGTCTTTGTCCATGATCTTCGTTGAGTCCACGATCGTTCTATCTCTCGATTGCCAATGGGGACATGGGATCTAGAACCATTTCTCTACAATAATGACATGAATGCTCTGAGGAGTTAAATCGCTAAATTTGTTGCCGGAAGAGTAAAACTATAAAAAAAGACAAAAGAAAAAAAATAGGAGTGATAGT…
>Peanut_newGene_1522	Peanut_newGene_1522.1
CAAATCCTATAAACATGGGCAGCCAATAATTAAAGCTTGTGTTGGTTTTGGATTTGGCAGATTTCTCATATATAACTGTTGCTGGGTGGGATCCAACTTGTTAATTTTCAGATTGGATTCTCTTATTCTATCTCACAAAAGTTGTACAAGGATAGATTGCTCCAATCAAGGGGTATACCATTGCAAATAGAGTACATGTCTTCAATAACTTGCTGGTGCTCTGGGCTAATGTCCAATTCTTCAACAGTAGTGGTAGCTAATGATAAAAGTAAGGATCCGAGACCTGCTAGTTTCGTTCAAATCCCTTCGTGGATCTCCTTGAAATGCAATAATTCATCCTTGAGGACCCCTAAAGTTCAACAGGGCCAAGTTGAAAACTTGCATTTGATTTCTTTAGCC…
>Peanut_newGene_1524	Peanut_newGene_1524.1
ATTTCTAGCAATGCAGGTGAAGAAAAGAAATTACACAAATAATGTAATCCATTGATTTGAATCCCTAGATTTGGGTTGCTAACTTAGGAAGCAAAAGAAAGAACAGAGGTGGCGGCAAATCAGTGGATTTGGGATCGCTGAATTGGGTGAATCTAATTCCACAGTAATCACTAATTAACGTGTTATGCAGCTCTGGCATCAACACGCGTCATCTCAATCCAACGCACAAAATTGCGTCTCTTTCTCTCATCAAGTTGGAATCTTGCTCCCTTCTTTTTCTCTTGTTCTTCCTTTCTCTATATATTAGCACCCCAACCCTGTCGGTGTTCATGTGCGTCACTGCTTAATCCTCGCTCTAACGCTCGATCTTTGACTCTCTTCCCATTCAAACAACCGATT…
>Peanut_newGene_1529	Peanut_newGene_1529.4
CTTTCTGAAACACCAACATACACACATGCACAGGGATGGAGAAGAGAGAAAGAGAGGGCGCCAGCGGAGAAGAAGAGGGGAGGGAGCCGCGCCACCACCATCCAGCTTGTCGCGCCGCTGCCACGGTGCCGTCGTAGTCGCCGAGAAGAGAAGAGAGGGAGAAGAGGAATGCAGCCAGTAGCCAGGGGTAGTCACCGTCGCCGCCTTGGAGCCATCACTGTCGCCGAGCCGCACGTCATCACCGCTGCGAATTGCGAGTAGAGGAGAGGGATAGAGACGCGTTCGCGAGGGAGCTACTGCCGTGGAGAAACTTATCACCGCGACCGTCGCAGCACCGCGACCGTCACAGCACCGCCATCCTCGCTACCATCCGCGCCTCTGTTACCATCGTTGAAGCGA…
>Peanut_newGene_1531	Peanut_newGene_1531.2
TCTAATATGGAAGGTAACAGCTCAAATACTAATCAAGAATTAGAAGGAGGATCACGTTTCAATATTCTTCAAGAGAAGAATAAGGAAGACACGCCTAAAGTCATGTTTACTTCCCAATCCTCTAACAGCAACATATAAGTTGGGATAAATGCTTCCCAAACTAAAACATGCAAAATGGGCCTCTTCCTTCAAACCTGGGCCAAAATAGGCAAAGCAAGATTTTCATGGCAAAGAACAAACAACCCATGGAGTCCCAAGTGGTTTGACCAAGAAAAATACCTTTTTTCAAGTTGTGAGCACATCCTCGAAATCTCAAGTTAATGAAGAAATCGAAGTGATGGTGATGAACATGATGAGGAATATGCAAAATGAGCAATATAAAGAATTCAAAGCTTCTCA…
>Peanut_newGene_1532	Peanut_newGene_1532.1
CTTCACCAATGATCCCAGTCACCCAATCATCCTCTCCTATGCCATGCTGATTGTATTGTATACGTCGTCCCAACCCAATTCTTCAGATATCGCTCGACTAAACAACCACGAATTGGAAAGCTAAGCAAGAAATATTAGCAATGGGTTCAAATAGTACAGGATGTCCGGCGGGCATGAAAGCGACGTCGAATGGGGTGTTTCAGGGAGACAATCCGCTTGACTACGCACTCCCTCTTGCAATCTTACAAATCTGCATGGTGGTTCTTCTCACTCGCCTCCTAGCATTCCTTCTCAAGCCACTAAGACAGCCACGCGTGATTGCAGAAATTGTGGGTGGAATATTGCTCGGTCCATCAGTTCTTGGACGCAGTTCTGTCTTTCTGAACGCTGTGTTCCCAT…
>Peanut_newGene_1538	Peanut_newGene_1538.2
ACACAGTAACGGCGCTCTCGATCTCGCTTCTCTCTCCTTCGGCTCCTCCATGCTCCGACAGCGCCGTTCTTCCCTCTCGGCTTCTCCTCTCTCCACCAGTTACGATTTCTCTAGGTACTTCTCCCTCTCCGCCAGTTTTGAACGAACGCAGGGAAGAAGAAGAAGAGAGTGACTCTTTCGTGCATCACGGAGAAGAACCGTAATTGAAGCATTTTCATCTCAGGGCCTAGCTGCCTTAATTGGATTTGTGTTCTTGTGGTTTAATTGGCAACCTATAAAGTGAAAGATTCTTAATAAGGTAATAGCTTCGTGTTCTTTCTTATCAAGTTACTAACCATTTTAATTTGTTATTGCCTTAATTAGCATTAGCTGGTTCCCTTTTTCCAGTACAAAATATTT…
>Peanut_newGene_1544	Peanut_newGene_1544.7
CTTCCAACGCAAAGAGATGCTGTGAGTCTGCTGGGTTCAAAGTCAGGTATTGCTTTTTTTTCTATCTATCACTGGAAAAAAATGCAGCATCTTCTCCAATGTTAATTCCATTAAATGGGCTCCTTATCCACGCCTCCCTAGCTTTTTCGCAAGTGAATATGCAGTGAATAACATATTCGAAGATCTTGGAATTCATTTGTGGAGGAGCTCCATCACCAGAAGATGCTCATAAATATCTCGCCAGAGGAAGAGCATGATCTTGTAGAGGAGCTTCAGTTTCCAAAAATCTTGCCACACATCTCGATGCTGGAAATGTTTCGAGTAGAACTCATTCGGAAGGTGAAACAAGTAGTAAGCTACTCTGTATCTAGATGAGACTTCATACTTCCCTGATTTATA…
>Peanut_newGene_1547	Peanut_newGene_1547.18
CCACGCTCTCTCACCGTCCACGAGCTTCTTTCACTGCTGCCGTCACCGCTCGCGTCGCACAATCTCATCACTGACCTCAGCAACGGCCATTCGCTGGTTATCCTCATCCACCGGTTCAGGAATCACTGCACTCATTTTTCAGGGAAGATCTCTGCCTCTGGTGGTCGTGGAGGTAGTCGCGTCATCGTCGTTCTCACCGCTCTGGGCCCATCCACCTCCTTCATGCACGGTGTCATCTCCCTTCAACTTTGCGACGGCGCCGTTGGCTGTCGCCCAGCCAACCACAACCTTTGTAAATGAGTAAGGTAGCTTTGGCGGTGGGCGATTCAACCCCTCCGCTGCTACTCTGCCGCCCTGGATGGCAACTTCCTCCTCAGCTCGGCCCGAGCCGTTTCCTCC…
>Peanut_newGene_1549	Peanut_newGene_1549.1
TTTTCCGGTTGAACCACAGTTAGACCGGTTGGACCACTAAACCAGTGAACCAGTGACGAGCGGTTTGATGATCATTCCGGTTTTCAGAACCTTGGTTATTTTATAGTGTGGTTTCTCTTATTTCGCAGACAATACTTGTATAATTGCTTTGTTTCACTGTTGTATAATTTTTGACAGTTAAATAGTCTCTGTTTATGAAATTATTAGTGAACGTTTAAAACGGTAAATTTTTTTTATAATATTTAAAAGAGTAAATATTAATTTTTTTGTCCATAAAAAAACCCATGAATTTTTAGGTACTACCCGTACCATAATTATAAAAGGCTTAAAAGCCGAAAAATTAAAAAACCTAACCCTAATTCCTAGTTCTAGCAGAATCAGAAACCCCCGGTAGCCACC…
>Peanut_newGene_1553	Peanut_newGene_1553.1
AGGCACTCGTTCCAGACAACCTTCATAGAGTGGTTCCTTTCTGTGAGGACTCCATGGAATACTATAGTAGTGAGATTGAGTTGCTGATTATGATTCTTGAATTTGCTGGGAATTTGTCATTTCTGGATTGAGGCTTTCTTCGTGAAGTGCCCATTTGTTGTTGCTTTCTGCGGAGAGTTAGAGAGAGAGACATGTTCGAAGGTCGTTCCTGTGTGGTTTCGAGATTGTTTCCTAGCTCGTGCCAGGCAGAGAACAACTGGTCTTACATGAAATACCTGCCTGAGTTGGACATCAAGAATAATGGCAAGCGCCCTGCGGAAAATATTGCATCCGAGGATGAGAATCGTCCGAGGAAGTATACTAGGATGTTGGACTCCAAACAGAAATCCCCTGAGGATA…
>Peanut_newGene_1557	Peanut_newGene_1557.1
CTTCGTTCTTGATGGATCTGTTTCGGTAGGTAATGATTTCTTTCAACCCTAGGAGCTTTGCTCTCGTCTCCAAGTTTCGTTTCGTGTTCCGTACCATACGGTTTCTAGGAGCCGTGTTCTCCTGGGAGTTTGTTCCTCGCCGTTCATCCGGTTTCCGGATTTCCCAATTTTCCGCTCAGATTCAATATCTCAGATCCCTGTGATGGATTTTGGTATCTGTTCCGCGATTGAACCAGGTTTTGCTCCTATGATTAATTGTCTCAATGCCATTGAATGGAGATGATAATGTGGGAGTGCCTATCAAGGTATGGGCTTTCTATCTAACCTATTTGGTGAGTGGTGATGTGATAGATATGAATTGATTAATAGCTTTTTCCTGATTGAATGAAAGATTTGGAA…
>Peanut_newGene_1558	Peanut_newGene_1558.2
ATAATTGCAAAATTGATTTGTCTATCTTTTGTTCATAGCAAGAGTTAAGGAACTTTCATAATTCTTTCCTGGACCTTGTGTTTGGTTCAATTAAATTATTTTGCCTTAGATATTAACTCTTGATCTAATTGTACTTGATTATCTTGTTTATCTATGCTTTACTTCGCCTGGAGTAGCTATATTCTCTTGTTTCACTCTGGTGGTATCTCCAATTCAGAAAGCATCTTTAATTGAAAAATCACGCCAAAAACCTCAGGAAAGGATTAAGACTCTGACAAATGCTGTAGGAAATAATTCCTATGATCATGACCCTGTACTTGCTGCATGTGGAATTTATGTTGAGAAGACTCGTGTTCTTGAGCCACCAAAGTTGAAGGTTGGAAAGAATGATGATTGCTT…
>Peanut_newGene_1561	Peanut_newGene_1561.1
AATAATATCATTTATCAAAGAAGGGAAGCACGATCCATGGAACCCTTGCCAGATATTAACAAGGTACCCCTCTGTTGTGGTCCAAGAAGAGAAGCATGATCCATTGAAGCCTCATCAACATCAAATCAAGCAATTTTCTTTGCAAGAAATCACAATGCACCTACAAGCTACGGAAGAGGCAGAGCATGATAAAAGAAAGACAAGTCGTTGTAGCAGAGGAAGGGGAATCAAAGAGTCAATAAACCACATCACAACAGATCCAAGATTCGAGCAACAATCTAAGTCTGAATTAACACAAGTTCAGCAACTCTTAGCGTTGCTCAACAATCAATCATACAAGGCATACCCACTAATAGACTCAACTGAAGTAGCAACTCTAATAGCTCCTTGAAGAAGCTT…
>Peanut_newGene_1563	Peanut_newGene_1563.2
TATACACACGATGGCTCGCTCAATCTCCCTTCTATCTCTCCCTCGTCCTCGTGCTCAATCCATCGCTACCGCCACTTTCACCCTCCACCATCGCTTCCTCTTCAACAGAATCAAAGGTTCCAAGCCACACACCTTGCTTCCCCATTGTACGACGATAGCGGATCTCTTTTCAGATCCCGGATCTTCTCCGGTGACATCTCCTCCGGCGACGACCTCCTTTGGCCACATCTCTTCCCATGGTAATCTCCTCCGGTGATGTCACCTCCAACTTCCTCTCCTTTCCATCCTAGCTCTGCGCCTTCTTTGCCAAAATCCTCAGCGCCTCCCTCAGCGTCTTCTTCGATGACATCTCTCTATTGAAGATCTGTAAATCCAAGCCATCACAAACAGAACAAGCAC…
>Peanut_newGene_1566	Peanut_newGene_1566.1
AGTATAACAAAGAATATTATTTTTAATTTGTAGGAATTAGTTCCCAGCATCAATAAGGTTAGTGGTTTTAATTTCTATTCATTTGTATTCCAACTCTTACCATCATTTTCAACCTTAAAGACCCAGTTTTGCACTCTGAAAAGCATCATGACTTTTTAAATCTATAAAGTATCAATCTTTTACTTGGAGTCTTTATTTGGGATGAATTACTACACTACAATACGGCAATGCAAGTGTGGAAGAAGAGAATAATGTCGTTCAAGTTGCCTTCCGATCCGAACACATGTCTTGGATGGAAGACATGTACTCTTCTTCTCTATTATTTCTTCCTCTCTTTTCAAATTTTAATTATGTTTATATGTAATGTATAAAGCCAGACTCAATCTAAGAAAAGAAACC…
>Peanut_newGene_1567	Peanut_newGene_1567.3
CGCACACTCACCACCCACTTAGTGAAATTTTTAGTCATTCCCTCCAAAGCTCATCATCACTTTTCAGAGAAGATCAAAACCCTTTCAGAGAATCCTTTCAGAGAAGAAATTTTTACCCAAACCTCCAAAGCACGAAGAAAACCCTCACCATCGTAAAGATCGAAACCCGCTGTCTCACTATCGTCGCATCCCAGTCACCACTCACCCCCCATCACCAGTCACTGCCACACACGACTCACCACTCACCACTCACCACTGACCGTCGCTCCTCTTCGCCTTCCTGCTCTGATCGTCGCTGTGCCGCCCATACCATCTTCGATCGCCGCACTTCTCGTCGTCCTCTCTGTGCTCGCGGCGTCGATTAGGTATGTATTAATTTTCATTAGATTCTGAAGTTTG…
>Peanut_newGene_1571	Peanut_newGene_1571.1
AAAGCACAAGGTGGAGAAAAGAAACAAAAAAACTCAAAAAGAGAACCAAATGAACCTTCGACAACGAAAAGTGACACATAGCAGAAGAACACCCCTCTAACCCAAATTCAGACTCTCTGGAGATCAATTTAATTTCTCTCAAGTGTCTTCCAAACGATCTGCGTTTCTATCTGTATGTCTGTAACCTTAATATTTAGGGTTTCAACTTCTTCGCTGGTTGAGATTGCGGTGAAAGATTGGGTATCCACCAGTTTCAAGTGCCTGAGCACTGGGTAATTTCTCATTCTGCTGTTTTACTGCTTAGTTTAGCTTAGAAAATTTTGTTCTCTATTTCCTCAGTTATAAGCTTTGTGAATTGTGATTGTGATTATGATTGTGTTCATGGGCAAGGAATAAGGT…
>Peanut_newGene_1574	Peanut_newGene_1574.1
ATTCAATACGATGTCGTTTCACTCAAAACTACTCAACAAAACCCTCTTTTATTCCCTCTTTACCCTCCGTCGATTCACTACCACCGCCACCACCACCGCCAAGCAATTTCCCGCTAACCCAACCTCCACCTCTTACGACGAACTCACCAATGCTGCTGGAAGCTCCGGCGACTTCCATGCTCTTCGCGATGCCCTCAACAAGCGCATCCAAGACAACTGCTTCAACACCAAGTCCACCTTCAACTTCGTCACCGACGAAACCTTCTCCTCTTCCCTCCTCAACCACCTCCTTCAAACCCTATCCGCCCTCAACCGCGGCGTCACGCGCAAGAACGCGTTCGATTCCCTCATCACGCGCCTCTGCAAGCTCCAGCGCGTCGATGACGCGCTCCACGTCAT…
>Peanut_newGene_1576	Peanut_newGene_1576.2
ATTAAAGAGCAGCCAAAATTTTGACCAACAGTCAACACCTTTTCTAAAGATTTATACAATGCAAGAAACTGAGGATTTGGAAGAACTTCCAGCATCTTCCATAGAGAATGGGAAGAGACATAAAACACGGGAAGAGAAGACGGAGGATATTACTGTCTATGAACCACAAACACTCTATTCTCTGCTTTTGGATAAACAAGTTAGTCCATCTGAACAGAAGAAAATCGGAAAGAGAGAAAAGTTGTTTGATTTGCGAAAGAGGATGAGCGAGAAGTTGGAAGAAAAGAGACGTCACTTTGTTGAAAAGATGAGACGACCATGAGAAAATGAGAACAAAAAAATAGAGATCAGACTCTGATTTCTGTTGCTGATTTGTTGATCATGTTAGATATTAGCAAT…
>Peanut_newGene_1577	Peanut_newGene_1577.5
AGCATTCCATGAAGATAAACACCGTCTTCATCGTGCCTCAGGAAGACGATTAACCTAGCTAACCCTAACCTGTCTTCATTGTGCCTCACTGTACCCTAACCGTCTCTTCATTGTGCCTCACGAAAAACCCCTAACCACCACGAAGAACGTCGCCGGTCGCCGGCGCTTGCAATGCCTCCGTCGAAGAACCCCTAACCGCGACGAAGAACCCCTAACCCTCCTTTGAGTTTCTTCGCTCTTCTCTCGCCATTCTCACCCTCAAGCTCACTGAGTCTCACCTCTCTCACGGCTGGTCTCGCCGTCGACCTCTCTCTATCTCTCCAGTATATCGCTTCTCTCGCGGGCGTTTCAGACTCAAGGTCGTCACGCTCTGTTTCCGTCGCTGCTCTATCGCGCTCT…
>Peanut_newGene_1579	Peanut_newGene_1579.2
AATGTATTTGTTGTGTGATAAGGTGAGTATTAAAGTGCTGATTAACTCCTTGTTGGCGCTGAAAAATTTTCATCCTTTGGACATTACTTCTAAAGTGCCCAGCCTAAAGCTTCATCCAGCATGAACAGACCAAGAAAATGGAGCATCTATATTGAAAGCTCTTTCTGCAGTTATGCTTTCAACCCAAGGTTATAGTTCCATTAGGTTCTCATAATGGTGGTTGTGTTTATGTTTCATTCATCTCATTCCATGGGGCTGATAAATTTCTGCTTGATATGGTGTTGGATATGTATTGAACTCTTCAAGAGCAAGTTAGTGTTGCCTCCTATTCTTTGCCATTACCAGATACTAATGACAACATTGAAACTTCTGAGCTTCTAAAGGAGAAGGTTTGTTCTA…
>Peanut_newGene_1589	Peanut_newGene_1589.1
TAAGAATGTATCAATAATAGGGAAAGCTTGGTCTTCATGCAATAAAATGTGCTTAGTCCCTCTGATGAAATGGGATGAATCATGAATGCACGTTTAAAGTTGTAGGACCAAAGGGTAGTATTTTTTATAGCAAAAGCATTAAATGCTTCAAGGAGAGTCCTTTAAGAAGGCCTTGACTGAAAAGCCTATTCAAGTTGGTTCTAAGCAGCTATCATCACTTGAAATTTTTTGCTTTTATTTCTGTTTAATTATGTGTGTGCATCTAATCCTTCAATTGTTTTTGCCCTTTTACTCTTTATAGAGCTCACTGTGCATATAGCAAACAACTTCTAGGTTCTAACCCTTACTAAAATTAACACCACTTTAATGACACTATCTCTCCTTTAAGAATATTTACTG…
>Peanut_newGene_1592	Peanut_newGene_1592.1
CTTTTTTCATCAACAAAATTCTTCTTCATCTTTTCTCCTTCTCATCATCATCATCATCCATGGCTTCACAATCTCATCAAAAACTCACAGTTTCCACAACATCACCGAAGAGTGACAGTGGCAGTGGGAGCGGTAACGGTAACGGTAACGGCGGTGGGGTCGCCAAGGGACACTGCTTGTGTTCACCAACCACACATGAAGGTTCTTTCAGTTTCTCCTCAATAATCCTCCTCATCATCGCATGATCCATCATCCATCCTCATCAAATGAATTCATGGATTTTATTATTCATATATATGTGATTGATGATGAGATGTTATAGGCCATGACATAAAACACAATCAAGC
>Peanut_newGene_1597	Peanut_newGene_1597.2
TCCCAGCAGCCGAAAACCCTACCCTGTCTTCCCTTTCACCTTCAGCAAGTTCACCAAACTTGAAGCCCATAGCAATACCCACGGTTCCTTATCTTGTTCCATGGAGGATGGAAACAGAAATCTGAGATAGGGGGCAGAGAAGGGGGAAATCGTAAACACAACACACACCCATGAAGCACCGTTGGCCAAACTGAGAAGAGGGGAGATGAGGAAGCACGGCGCCGGCGGGCGTCACTATCGCAGCGCCGCCGTGTTGCATCAGGGAGGATGAGCGAGCGGGGAACAACCACGAGAGAGAGAGGGTCGCGCCGCCACGGTCGTCCAGGAGAAACGCCGGAGAAGAAGCTGCTGCGCTGCCCAGAACCGCATTCGACCCGCCGCCGATCAAGCTCCAGTTGC…
>Peanut_newGene_1602	Peanut_newGene_1602.1
AAAAGCCCGTCTAGCTCAGTTGGTAGAGCGCAAGGCTCTTAACCTTGTGGTCGTGGGTTCGAGCCCCACGGTGGGCGACATATATTTTTAGTGTTATCAATATTAAAACTAGGAAGTAATTAGCTAGAAATATAAAACTATAAAAGGATAGTGAACAACTCATTAATATATAATAAGTAGCAACTTATCTTAGTGTTTCCATACGTTGTATGCCTCATTTGAGTCAAATTGTTGTGTTGTTTCAGTGACTCATTGTTCGCATTTATACATAGAGAGATCAGCATTAATCATTCTTAGTTAGTGTGTTAAGAACTAG
>Peanut_newGene_1606	Peanut_newGene_1606.1
CTTGAACGATTCGGTTCGGGTTGAGAGCTTCACCTTCGAAGAAGAACTTGTTTCTTCCTTTCCAGATTTTCCAGAGCAGAGGCTCGTGGTCTGATGGAGCGTTGGGATTCCCATTCTTGCAATTTGCCACACTAATTGCGAGGTTCACAATTGATGAGGCAATGGGTGACGGATTCCTCTTCGGCAAAGCAGCGGCGGCACAAGGGAGATATTCATGGGATTCTTTCGTGCAATCTCTTACTCGTAGGTATGCCATTGTGCATGATCTTCCATAGGAAAATCCTCACTCTCGGCTGTATTTGCAATTTGCAAGTCCCAAATTGATGCCCAGAGTTTCTTCTCGCGACACTGGACTGAGAGCATTTCCAGAGGAGGGTGATAGAACTGGTAAGCTACTTG…
>Peanut_newGene_1610	Peanut_newGene_1610.1
TCGCCTCTCACTCTCGACGGTCTGTACTCGCCTCTAGCCGGCTCATCTGCTCGTCTCCGTGTGTGCTGCTCTGCTCACCTCCGTCTGTCGCCTTCATTGCCCCGCCTCGTGACTCGTCTGTCCCTGCAGTGTGCTTTGACGTGCCTCCACCTTCTTTGCTGTGACTTGGGTTCTGCTTCTGCAGTGTAGAGTAAGGCTTCCAGGACAAAGGCTGCTTAGCAACAGAACAGTGAGGTGCTTAACAAATGTCGAGTCATTTTAGCCATGGCCTCCGGCCTTGAAGAAGTCACAGTCCTTTTCACAAGATTCTTGCGGAGTCCGCGTGTTCAAGGAGCCTTAAGGTCACATCTCTTTTCTCCATTAAATTTGTATCTAGCTTCAATTTATGAATTCAAATCC…
>Peanut_newGene_1627	Peanut_newGene_1627.1
CTTGAAAGTTGATGCATTAATGTAATTATGAGATCAAATTTTGATTTTAACTACTGGAACTTCCGTGGATGTACTCTTGGGATTCATTTGTGTTCTTTTCCTGGGTAGTTTGTACATTGGACTGTGGCTATATCCAAAACACCTGGTTTTGGAATCTTGGACTTTGTTTCAGCATTTGGAATTTCAATAAATACTGTTGTTTTCCAAGAAATCCACAACCATTCATGTTTTAATGTCTTGGTTTTTTGTTGAGTGTGTACCATTACTTGATTGGATTTAGTTGTGCTCACAACTTTGTAATTTTGTGTTTCCTTCGTAGAATTTATTTGGTTTCTCTGCAAGGTTGTGGTTAAATTATCTTCAGTATTTGCTTGCTGTTGACCAATGTTTTCCATTCGT…
>Peanut_newGene_1633	Peanut_newGene_1633.2
TGCCATCCTCCGGAGTCCAGACTGAAGCAGCCGCGAAGGAGCCTCTCTCCCCCTTATCCCCTCCTTCTCCCTCTCCCTTTCTCGTACCCGCTCTCTCTCCATCGTCTCCCACGCAGTGAAACAGCAGTAGTAGTGCAGCACGCACCATCGCCCTCCGTGAAGCACAGCGTAGCGCAGTCCAGCCGCCGTGTCTTCCGTCACACAGTTCTTCTAGCCTCGTCGCCTCCGTCGCAGCATCTCCCTCTGTCGCAGCATCTCTGTCGTCCTCTGTAATGGAGCCTAAGCCTCAGGAAAGGAGAAGGTGAAAGAGGAAGAATGTGGAATTAGTGCACAACATGAAAATTTCAGTCTCTTGCCTTTTTTTTTTTTGCTTCTTGATTTTTCTGAGTGAGGTTGATT…
>Peanut_newGene_1637	Peanut_newGene_1637.1
GAATACCTTAGCATTTGTGATGCTTCTCTTATTCACAACAACTGCTGACCAATGTTTGAGCTGCATTGAACAAGAGAACCAGGCTCTTCTCAACTTCAAAAAAAGCATTCGCAGCTTCTTTGATGATGATCCATCATCACCACCTATACTTTCCTCATGGGAAGGCCATGAATGTTGCCAGTGGAAATGCATAGCTTGCAACAATGTTACTGGACATGTTGTCAAGATTGAACTCAGCAGTGGTTGTGCATCAAGCCTTTTATCATGGGAAGACACTGCTATTATAGAACCAAACTATGATGACTTTTACCCTGATTTGTTTGTTGAACACTTGAATTCATCTCTGTTACACTTAAAACACTTGAGCCATTTGGATTTGAGTGGAGTTTCACTTTATTC…
>Peanut_newGene_1639	Peanut_newGene_1639.2
TGAATTTTGTAGCCTCTCTTTACAACAATTAACCTGTGAATGTCGTTGTTCTGACCCATGATTCTGTTTATGTTTTATATTTCATTTTGGGTGTGATCTGTGTGTTCTGCAGCTGGAAAATCTCTCGGGCAGTTTGCTTTGTCACGCACAGTTGATTTCCTTTGTCTTCTCTCCATTGTATGGCCTTATCCCTTGTGTATGTGAAATATGAAGTTTGATTTTTTTTTCTTTTAATTTTTTTGCATCCCAGTATTATTATCATTTTTGGTTTTAAGAAATCCAGTTCAGGTAGTTTGAATCTATTTTTCTGCTTTGATTGGAAAAAAAAAAAACCTGCTACTGTTCTTTGTTCTTGTGATTATGTCAATGTTATGTTGCACTGGTTGCATTTATATATTA…
>Peanut_newGene_1648	Peanut_newGene_1648.1
TTTGTGATATCAGACAATTTTTTCCTCAGGAAAATTAATTAGGAATTTGGCCCCAACCCTCTTTATTATAAGTTAAGTCCGTTTTAAAAGGGAATATTGTTGAAATTAGGATATCGTCTTCAACCTCTTGTTCTTTGTGCAAGGGTGAGTTGCACCTTCGTCGCGCATCTTCGTTGTAGGTAATGGAAAGCGGAGGTAGCATGTCGACTCCAACCCGGCGATGAGGTGGGCAACTTCTAGTGAAGAGATGAGTGTTGGTCGCATGACTTGCTTCGCGAAGGGTCGAGTAAAAAAAAGGAGAATACCCTAAGTGCAAGTGCAGGACGTATGCTATAATCTGCAGGTTTCACACACCGAAAAACTCGAATAGACTGTTCTTTAGATATTCAGTTTAAGGAA…
>Peanut_newGene_1651	Peanut_newGene_1651.1
GAGTTCACAAGTTGACAACGCACACTTGACTCACGCACTGAGCTGTGTGTCTTCTCTTGTCTTCTCAACTCTCAACTCTCCCGTTTCCTCTCTCCTAACAATGCACAGACAGTCCCTGGGTTCGCCCTCCTCCAAGCTCCACCATGGAGTCGCCCTCGCCGACCACCACGCTCTCCCCGCCGACGACGCTCCCAAGCCTCACCGCATGTCCTCTCCGCCTCACCGCCCTCCTCACAAGCTCATCCACCTCATTCCTCTCCTCACTCTCCTCTGTTTCCTCATCCTCTACCTTTGCTCCCACACTCCCTCTCCCTCAGATTTAGATCATGTTCCTGGATTCAACCGCTCCTCCAAGCAACATGTATTAGTTGCGGAGATCAACGACATTGAGCGTTACAC…
>Peanut_newGene_1652	Peanut_newGene_1652.1
TCTTCTTCTTCTTCTCATCACACGCAGCTTTTGACCTAGCTACCATCCCCTTCAACGATGGCTATTCTCCTCTCTTCGGAGATAGCAACGTCGTTCGCTCCGATGACGGCAACGGCGTTAACCTCCTCCTCGATCGCTTCACCGGTTCTGGCTTCATATCATCGAGTATGTACAAATATGGATTCTTCAGCGCTAACATCAAGTTGCCTTCAAATTATACAGCTGGAATTTGCGTCGCTTTTTATATTTTAC
>Peanut_newGene_1654	Peanut_newGene_1654.1
AAGGGCATCATATGCTTGTTTTCGTGATAGGATGATCAGCTGCTATTCTTACCTGAAAATGCTCATGGAACTTCAGAGGGTGTAGGAGGATTGCCATTGGAGCAAACATTTTGTAGCTTTTTAACTATGTGCAAGGTTGTTGTCCCTTGTTGGTCCTCCGTTCAATCAAATTGGTAAGATTCTTTTCTTGTACCTACAGTATAAAGATTTTATTGTAGCTATAACCCTAACCATCCTAGGAATTCTCAAAGTGGATAAGTATGAGAATTTAAACGATTGGACTATATTTCCATAAGAAGCCCTTAGGGCCGAGACTTAAACTATGTACAGTGCAAATGGACATGCATTCTGGTTTGAATATGTGAACTATGAGGCCGCGATTGCTTTTCCTACCATGTA…
>Peanut_newGene_1656	Peanut_newGene_1656.1
CCTAACGCCATCCGCGTTATTAATCTTCGGTTACCCACCGTAACATAGCCCATATAAGATATAACTATAAACATCAGATAATAAAGCCACGGTTATACATAGCCATGTATTAATAATTCCATAATAACTAATAAGCATATCCCAAAATTCTATTTGTTTGGCACTTATGATGCTACCACAAAGGTTCTAATATTCTATGATGCTCGTGAACTTTTCTTTTTATTAACAACGGAGTTAAAGAAGCTCAAACAAAAGACAAAACTAAGAAGTAATTATCTTCGAATGACATGAATTCTAACATCTTCTCTTTGAAATTCCACTAGACCACCATAATCTACAGCCACTACTCTAATCCACTGTCCACCTCTCTTCTTCCATTTCTCACTGCTGGCCACCGCC…
>Peanut_newGene_1659	Peanut_newGene_1659.2
GGAACATTTTCAAAGATTGCCACTGTTGCAAAAGGCAGGCCCATATCTTCTGGAGATGCATGTAGTGAATTGATGGCATATTCATTGGTTTTGTCTTGCTGTTGTTATACCTGCTGCGTAAGGAGGAAGCTTCGGAAGATGTTGAACATCACCGTAATGCTTGCTAAATCTCTTCTCTTATTTGTGTTTGTATTTAGATGTTGTTAGCTTCATTGAAGATGCATAAAGTATATTTGCTAAGGCGCGAGCAATACAATGGAATTGAAGAATTAGTATTAACTTGTGTGCATTTTCCGGTCTCTATAAAATGTTTAAGTATTAACATTTAAATTCTATTTCAGGGAGGCTTTATTGATGATTTTCTATCTCATTTGATGTGTTGCTGCTGTGCCCTTGTGC…
>Peanut_newGene_1667	Peanut_newGene_1667.1
CACAACGCTAGAGAAGAGCAATTTACCTGCCTTGTGTCATGCACAAAATTCTTGTCATATTCTTACAAAAAGCTCAGAAATATCCATGCTTAAAGAAGGTCCGCCAAGTGGTAGCTTGTCGAATCAGTTTCTTGTTGATAATGTTTCAAGGTCTGCAGCTACCCATATGGATTTGACAAGAAGCAACTTTCTTTCAAAACTTTATTCTTTTGCCAGCAACACAGGTAATATGTTATTAAGTTGTTTTATTTGGTCTTACTGTTATACCAAGCTGCTTATGCTGATCATGACATGTGCTAAATTAAGTAAATTCGGCAATTATCAAAAGAGTATCTCTAGCTATAAGTGGGTTCGCAGCATTTTGGTACTAATTAATTATTACGTAACTAGTTTTGAAGC…
>Peanut_newGene_1669	Peanut_newGene_1669.2
CGCCGGACTCGCCTTTTTTGTGTTCGCCGGTGTCGCCTCCTCTGTCGTCGCCGTTGCTCACCTTCCTCCTTCGCCGTCGCGAAAAATTTAGAGCAGATTTGAAGTAGGTTGATGTTCTTCAGATGCAGAGTTCTATTTTTTTATTTTTGTATGTTGTTAATTATATGATTAATCATTCTGTTATTTTAAAAGCATTTGATGTAGGTTCAATTTTTTCAATTATGCTCTGTTGATGTAGGTTCAATTTTCTCAATCTGCGACTTTCTCTCTCTGAGTCGAAGTTGAGCCTCTGTTCCATCCTCTTTTCGTAGAGTTTCTTGGTGTGCGGTGACCTCTCATTGCCGTCTCTGGTCGTGGAAGCATCATTGTACGACAGCAACGCTTTCCTCCCTTCTTTAT…
>Peanut_newGene_1671	Peanut_newGene_1671.1
TTCAAAATTTACTCACATATATGCATGCGTTTGTTTTTGTTTAACGAAAACAGACTCAAAGTTTGAAAATTGCATTCAAGATTGTCACTCAAGTCTTATAGCCACGTCCCTTCATCAAAGATCACTTTGGGCATTTGCTTCATGACAAGAACTTTCATCCATTGAGAAACTGTCTCATTTCTTGAATCTGTCCAAGAGGGTGCTGAGTTTTGAATTTTTTTTCAAAGATGAATGATCTGATGACGAAATCGTTCTTAAGTTATGTTGAACTGAAGAAACAGGTCATGAAGGACCTTGAAAATGAACGTGATATTGAAGCAGGGCAACTCAACCCCACACAACTAGAAGACCCTAATCTCACTCAGTTCTTCCAAGAAGTGGATGCAATCAAGGTTGAAA…
>Peanut_newGene_1674	Peanut_newGene_1674.1
TAATAATAATTACTAGTCTCTATGTTCCTGTCACAAATGCAGTTCAAATTTCTACATTAATTATTACTCTTTCTTTGCTATATCATGTAATTTAAGGGCTGGTGGAGTGGAGGATTTGGATATGGACTGTGAATTGGGATATTAGATCAGAAGTAACTTAATTACCTGCAGAAGCTCAATGCCAGCTGGTGAAATCCAACTTGATGCTAGCTGCATTATTGATTTGAACCTAGATTTCAATAGGTATTTTTATTTACTCCTTTTTATTGTTTTCTCCATTTGTTCACTGCTTATTATCAGAGATTTTCTTTATTTAGTCTTTTTTTTAAGTTGTTGCTTATTAAGGTGGAATAAGATTTGATGGTTGTTACTGTTGTTGTCATATATTGATTTCTAATA…
>Peanut_newGene_1675	Peanut_newGene_1675.1
CAAATTTTGAATTGAAAGTTAATTCAAACTAAATATTCACTTTCATTATACTCCAGAAGATGATTTTCTTTTTTACAATTCTTTTCTTCTCTCCAAGCTCTGATGGCCAACAACGATCCCTTCCCCTGACCGATGAAGCGGTCGTGCATCATGTGGACGTCCTAGCTGCACGAGCTCTTCCTTGTGGTGGTGGACGCAACTGCGGCAATGGTACGGGTTATGGTGATTGACTCGGTGGCAGTGGCTATGAGTTTTATCTACATCAGAATTCATTGGTCAAGTCACACATCTTCCTTCCTTCCTTTTTAACATAACCAGATTCTTCAATTATCCATCTCTTCCTCTTTGGTACGTTGCTTTCAAATTAATCTTTTCTTCTTTTTTTTATTGATGTGGTGG…
>Peanut_newGene_1681	Peanut_newGene_1681.6
CTTATGACTTATACAACCCACCGCCACAATTTCTTTTTCTTTGAAGGAGCTTTCTTTGGTGGGAAAAGAATAATCTGGACCTTAAAAGGATCAGGTTATAAATTCAAATAATAAAAAATGCACAAAAAAAAAATCAGAATTTTTTATTACAAAAAAGCACCAACTTCGCGTCATGGTGGAGGAGATCCGCTCGGTGTCATCGCTGCATCGTCTTCCCCGGCAAGTTGGGCGTGGACTCAGTGCCGCTGGCTGAGGAGATCTGAGAGAAGAGCAAAACAGAGATTCAGAGAGGAGAGAGAGCTCGCCTCGCCGTCGTCGTTGCCGTCGCCACCGCAGTTCATCGCCTCTCCAGATCTGGTCGCAACGCCCAAGCCTCTGAGGATGTTCCATTACTACGTC…
>Peanut_newGene_1683	Peanut_newGene_1683.1
GTTTGATGAATCCTATCTCAACCTTTTTTCTCTAATAAAATGGTAGACTATCTCAATATGTTTGTATCTTTGATGGAATGTGGGATTCGAAGCTAATTATTGCATGGCTGAGACGTTGTCACAAAAAAACATGGCAGAGTTGATGTTGATATCAAAGAATTTGAACTACATGTTTCTTACTTTTCTAGGTGATCAAGTAATCTCTCAAGAAGGTGCAATATCCAATTGTGAATCTTCTAGTGTCTAAATATATATAGCTTCCCCAATTTGTATCAAGAGAACTCCCTGGCCAGGTGCTGCTTTCAGGTATCTCAATACTTGATGGACAACATTGAGATGAGGAGCTTTGGAATTAGACATGATTTGAGCAAGCTATGTTACTACAAAAGTGATGTGAGG…
>Peanut_newGene_1700	Peanut_newGene_1700.3
CCACGGTTCTCTTCTCTCTTCTCTTCCCTCTCTGAAGTTCGAACAGAAAGAAGTCAAAGAACTCGTTACGACGCTGACGCTGACGCTAACCCGGGTTTGTTCTTTTTCCCTCGTATTCCCAATTCTAGCATCCAAATCGTACAGTTGGAGGGGTTCTGAGGTTAATTCAAATGAGTTCAATTATAAACCTTGAGGAGGTTCCAGTTACACCCATGAAACGTGATCCTGCATGGAAGCATGTTCAGATGTTTAAGAATGGGAAGAAGGAGCAACTGAAGTGCATATATTGCAAGAAGTTGTTCAATGGTGGTGGCATTTATAGGGTTAAGGAACATCTTGCTTGTAGGAAGGGCAATGGATCCATTTGCAGTCTTGTTCCCAAGGATGTTACGTTTCATA…
>Peanut_newGene_1701	Peanut_newGene_1701.3
CCACAGTTACACACCACAGTTTCACAAGCAGCTTCAGACTCCATTCACACTCCACAGTTTCACAAGCAGCTTCACCTCCTCAGTGCCACATTCTTCCATCACCGCTGTTCCATAACCACAATCATCCACCGCATTCTTCCATCATCAACACCTTTGGGACTTCCATCACTCTCGTCGTCGTTGTCAATCATCACTCTCGGTCCATTGAACAAACAGAACCTGGAGTTTTTCTGAGCTGGGTTGGAGCTGAATCCAAGGTAGCAGTTTGATGGAGCATCCACCTCATGCCGTTTTTATTAATGGTAAGTTAAGTTATTGTTTCTTGCAAAATTGGAAATTGCTGACGCTTCATCATCTGCCTATATCTAAAATTCATGTTGCAAGTTCATATCAACTACC…
>Peanut_newGene_1703	Peanut_newGene_1703.1
AATAAACAAGACTAAAGGAACCTGCTCCTCTGCTGTTCCCTATTTGACTTTCATTTTTCTTGATCAATTCCAAAGAGAAACGTGTCTCTTACTCTCTTTTTGTGTCTTCTCACTTCAAAACATCATATACCAGAACAAACAAGAATTTCAGAAGCAAAAAGAAAGAAAGAAAGAAAGAAGGCTATGAAAAAAATGGGAGCTACTGCAACTCCATTATTCAAGGATCATTATTCCATTTCAATTATCTCACTCACAAAGACGCTTCTTCCTTGGACTTTCTTTGCTCTTTTTTCCATAGCTTTTGTTCGTTTGTACTTCTATCCTTTTCTACCTTTTACTACTACTCCATCACCAAAAACTGATGACTTCTCCCACTCCTCTTACCCTTTTCTTCATGCT…
>Peanut_newGene_1710	Peanut_newGene_1710.1
CCCAATTCACCGAAAACTCCAAGTGGAGGTTCTGCTACTACGTTGCAATTTGCAAGTTTAAGGGAAATCAGATGGATTTGGATGATCGTATCGTGCAATTGGAGAAAGAGAAACAAGAGACTCTGGAGCAGCACGCCAAAAGGCCTTGTGTCAGAGGCAATACCTCCTCCGAAGAAGAAGATGAAGAGAAAGTTGTTGAGGATACGGCTGCCTCTGACGAAGAAGAAGAGGAGGAAGAGACAGAAGATGATACTGATTCCGATTCTGATTCCGAATATGTGCCGTTTACGCCTAGACGTTTAATGACTGATGAAGAAATTCGTGAACATCGGAGGCAGGTTGCTGAAAGCAACGTACGCCTTCTGATCTCTCACAACACATTTAGTGATTTAACTATTT…
>Peanut_newGene_1714	Peanut_newGene_1714.3
ATCAAATCTTGTGGAACTAATTCTCATGTCATTCCGAGTCATTGAGGTTGGAAGAGTTTGCTTGCTGTTGGTCCAACTCTTCTCAAGGACTAATCTCTTTTGAAGCTTTATCGTTATGCTTGCTACTGTCCGATGTGAAGAAATTGCCCGGGAGAAGTATAAAGCTGCAAAGAAGGAATTGCATCAACTGGAAGAGGATATGAGACGTAGCCCTACTGAATATTTGAACAGGCTCAGTTTACAAATTGATACTTGTTTGTCAGAGTCTCTGTTTGCTTCTAAGGCGATAAAAGCCAGAGATTGTATTTTGAAGGTTCCTTATAGAGTGGACTCTCAGTGGAATCCTTATATCTGCCGTCTACCATGGCAAGAGGAGTTGACTTAACACGGCAGGTTTTC…
>Peanut_newGene_1715	Peanut_newGene_1715.1
CAAAAACATTCCACAAGATAAGGTAACAAACACTTCCATTCTCAACAACATGGAGAAATATCAGTATCAACTGATATTGAAAATAGTTTCACTGCTTTTAACAGTGAAAATTGCATTTGGAGATTGGTGCAGTTCACAAGACTTGGAAGGTTTGATTGGTTTCAAGAATGGAATTCAGCTGGATACATCTGGAAGATTGGCAAAATGGGTTGGTCAAAGATGCTGTGATTGGGAAGGCATTGTATGTGATAATGCAACAACATCAGGAACAAGAAGAGTGACACAGATTCATCTTCCAGGGTTTATTTCCACAGATAAAGACTTGTTTCGAACCCAAATGATTGGTCACTTTTCACTTTCCATCACACTCCTCACCTCACTTGAAATCCTTGATCTTGG…
>Peanut_newGene_1719	Peanut_newGene_1719.1
CCACTCCAAAATGCCTCTGCCTCTCTCACACTCAATCTCCATCCTCTGCACTTAGCCCTAGCTCCTGGCCGTCCCTTACCTCCGTCCAACCACTGCCTCGTGCCGCCGCCGTCGTTCCCTCCAACAGCCACCGTCTGTTCGCTCACCTTTCCTCCATCGCGCTGCAGCCATCGATATCAACCTTCCCTTCCATCGCGCAGCCATCGCAACCTTCCTCCGTCGCGCAGTCGCGCAGCCACGCCGCCGCCGGTACTAGCTCTGTTCTCCGCAACCATTATCCCAGTTCGAAACCCGTTCGAAGCTCTGTGAACTGTGAAGTCGCTGAAGTGTGAACTGAATTACTCATTTACTGAAGCTTCTATCTCTGTGAAGTCTCTGATTTATTGATTTACTGATTTT…
>Peanut_newGene_1726	Peanut_newGene_1726.1
CCACGAGACTATGAGAGCATAGGTTTTGTCTTCTCATAAATTTGGAAAGAAATGACTATAAGCTTTCTCGACTCCTTGTGTGCCTTTCTCTTGATTTAAGTTTATTATGCTGAGTTTTGGTTGTTTAAATAATATTGTTGAAGTAAAATAGACCTAGAAGAAAGTCGCATTGAATAATCATGGTTGGGCATTTCATAAATTACATTTGAACCTTGAGAAGGTGTAAATAAGATGTTGAGTTGAATGCACAATTTATACCTAACATGCATTATTTAGGATATAATTTTTTCCATGATTAATTATAACATGTGATTAACTACGATTTCTATACTTTATAATATTTATGCACCCTTTTTGGCTCTAAACTTATTATTCTTGCCGCCTAATGAATCTTATTTT…
>Peanut_newGene_1732	Peanut_newGene_1732.1
CAGAAAACACTGCTTTGTTAAAAAATCTTCCATTCCGCCCTTACTTTTCTAACTACAATTGTCAATGAGTAATATGCATGGCCCTGACATTTCAAAGATCCTTCATTTCCTCTCTATATGCATCCTAGCATTCATCAATGAAGGCACTTCTACACTTTCTTGTGCCTTCACAGAAGAGCCATGGTCATGGGGTCTAAGCGTTCCTGTTAGTTTGTACCTAAAATTTGCACTTGAGATTCATTCTCATCTGGGAATCTGCGTTGGGATTGGTCTACCTTCCCTAGTTTACTGGGGTGCCACGCGCAACAGCATCGATTGGTACTGGGACGCTGTGTTGAAGTTTAACATTGAGATCATGAAAACCGGCATGTGTAACCTCATCATTGGATTGTTACATTT…
>Peanut_newGene_1738	Peanut_newGene_1738.1
AAATATTTTTCATCATATTTTAATTCCCTCCAAATATTTTAATAGAATTTACTTTCCCTCCTAAACCAAAAACAAGAAAAGAAAACACGAGCAATAATTAATTCATCACCTTCCTTACTAACATGTCAAGTACACTCAATTCATACCATTTTAGAATCAAAATCCTAACCCCAACCCTAGCTCAATTTCCCCAATTTCATGATATTGACTCGCGTTCTGCGTTCCTCTCTCTCGCCGTTGTGGTGTTCTTCACTGCTCTGCTCGCGTCGTGTTATGCTTGCATCGCATTCTGCTCTGCTCGTGTCATGTGCTTCTTCTCGCATCGTGTTCTGCTCTGCTCCGCCATGTTTGATCTTCAGCTCGCGTCATTTTGAAACATTCACTTTGCTCCGCCGTGGT…
>Peanut_newGene_1740	Peanut_newGene_1740.1
TTCCAGTGTAAAAAAAAGAACCAGTTTGAAAAACGTAAAACTAGTAGCTCAAATGGATTTGTATTGATTTTTTTTCCTTTCAAATTTTGTATAGGATGAATTACATACACTCACCTTCATCCTCGTAAAACCCTCTCACTCTCGCCATTCAGAGTCGTCGCCTCCCGTTCACGGCTCACCTGCACATATCCACATTGACCGTCGTCACTCCTCTTCGCCATCGCTTGCACTGATTGAAGCTGTGCCGCCCTCACCATCATCGTTGTGCAGCCCTCACCATCGTTGCTGCGCCGCTCTCACCATAGTCATCTCCGTGCTTCTCATCATCGTCTTTGATGTGCTCACATCATTGAATAGTTTGAACGGTTTCTTGGTTAGCCAGAAACAGAACTGGTGTGA…
>Peanut_newGene_1748	Peanut_newGene_1748.1
ATATATTAATGATTTTCTAGATTTATGCTTTACTCTTTACATTTACTTTTATGTATATTAAAGTCATTTGAAGTTTTTAAAACAATTTTACCGAACATAATTGTTATAGAGTATGCTTACTGAAAGCTAATTTTACCAAACCCACCCTGAATGCATGCTTTGATGAGCAGTATTTTCCATTCTAGATGAGGATTCTAAGCTAACAGAATTGCGATTAGTGTCATTGTTCCTGCTGTGATAATTTTCTTGTCATTGTAGGAAACAAGAAACAGGGCTATAGCTAATCCCTCTGTATTTTCATTTATTTTTATATATATAAATAGGAAAAAGCACGTGAAGGCATTGTTGTCAAACTCGTGAGTTAACTCGTAAACTCGTACGAGTTTAGGTAGTGGAATC…
>Peanut_newGene_1756	Peanut_newGene_1756.1
GAAGAAAAAAAATGATGCTCGGGGAGCACCATCGTGCAAATCCTACGGTTCACGTGCCACCGTGGCCGATCCTCGATGATCAAACGGCTGATATGTACTCTCCTTATTCCGTAACCGAAGGCAATGCTGGGGCAGGCGATTACTCTCCTTACTATCTACAAGAAGCTCTGTCCGCCTTGCAGCGATACCTGCCGTCGAATGATGCTGCCGGCGACGGTGGTGATTCCGACGGGGAGGCTCAGGCTGACGCGCCGGTTGACGCGTACTCGTGTGACCAGTTCCGCATGTACGAGTTCAAAGTGAGGCGATGCGCGCGCGGGAGGTCGCACGACTGGACGGAGTGTCCGTACGCTCATCCCGGCGAGAAGGCTCGCCGTCGTGATCCACGGAAGTTTCACT…
>Peanut_newGene_1762	Peanut_newGene_1762.1
CGTGGATTTAGCTTTGTTCTCTATAAACCCACGCATCGTTCTGCTCTACCTCTTTAACGCCGCACAGCCACCCCATTTCCGTCGTTGCCGTCGTCGTCTCTCTTCTCTCCTTCGTCGATTCTACGTTGGATCCCCCTCGTCTATCCTCTCTCCTTCTCCTCAGCTCGCCGCTACCATCCTTGAGAGGGATACAGACTGATCAAGAAGCTGCTGCACTTGCTTTCTCTTGAATTAGTGTTTACACGCCAAGAGAATTATGGCGGCTTTGAAGGAGCTTCTTCCTCCAGCAAAATCATCGTCAACAACTTACTATGATCACAGTAACGATCCATGGTTCAAGCAGAGATTCTCCTCTTCATCCAAGGAGGAAAAAGCCGCAGCCATCAAGCACAAGCCAGT…
>Peanut_newGene_1771	Peanut_newGene_1771.1
CTTATACGTTCCCTTTAACTTGAAGGTGGTAGGTTCAATGAGATGAAAGGAGATCATACGTACCCTCATATCTTATGGAATGTCGTATTATTCAAAATATTCTCATACCTTGAAGGCTTATTCCTCAACGTCTTTACCAACAAACATGGCCAGCTCAACTTTTATTCCTTTGAGGTTTGATAGCAAGGAATATGAAGGGGGACATGAGAAAGTAGGGGTTCCTTGTAAAATCCAGTCAAACTATAATTAATTAAATAATAAAACAAATATGAACAAATATGGTTAGAAAATTTAGCATTCGGAATTTGATCATTTAAATATGATATTTGGATTCAGTGAATTTTTCTGAGTCGAAAAACATAGTTTTCAGCGTAAAAATGCATACTAGAAATTGAC
>Peanut_newGene_1774	Peanut_newGene_1774.2
CAAAGGCGTCGTTTTGACGCTGAGGAAAGAAAAAAAAGAAAGCTGAAAGTGCTGAACGAACAAACCCTACCCATTCGAAGAGACACTCACCTCCTCAAACCTAATTTCCTCTTCCACCTTGCTCCAACAAACTCCACCATCACTACCACAATCGACGCCGGATCTGAGCTGCTGTCAGCGGATGGAAGCAGCTGTCAGGGTCGTCGTAGTCTTGAACTCTGAATTCTGAAGCTTCTGGCGTTGGCGTAGTCTGGTCGTCCTGGTCGTCGGCTTGTCGTCCTGATCGTTGGCTTCTGTCAACGTCATCGTCGGACATCTGGTCATCGTCCTTCGGTGCTCTCCCGCGCTTGATATCGTAAGGTTGATTACACTAAAGGTCTTTGTCTCAGTGGTGAAGTT…
>Peanut_newGene_1775	Peanut_newGene_1775.1
TGAGGCTTGACATGGCTTTCATCCTTGTTACATATGGGTGCAGAAGCCTATTTAACAATGGCATCTAGAAATAGAAGATTGACAAGTGGTTCCTATAGCAGCAGTAGTTCTAATGTCATGAGGGAATGTTTTTGCGATTGTGAATGAACCGGTTGTAGAACTAGTGAATGAAATGCTATTACTGAAATTGTTAGATTGTTTTCTTATTTTTTGTTTTGTAGTTTGTATGTTTATCATCATAGTTTTGTTTTTTAAACTCTAAGACTTTGTTTACAAGAACGGGATATTGAGACAGGGACAATGAGATACATCGTGTTTGACAGATGAGACATGGACAGAAACATTATGATACTGAATTAGTATATTTTGTGTCTATCCTAAGAGTAAGAACATAGTGAC…
>Peanut_newGene_1776	Peanut_newGene_1776.1
CCTAGAACAGTAACCCAAAGACAATATGGGATTGCGTCCTCTTTGTCAAAAATGTCCTTCCATATATCGAACAAGAGTTTGACAAAGTGCTACAACCTCTTCCGCGGTATCGATCCATCGCAGAGGGGCTCCATCCTCCGTGACCATTACGCCTCCATACGCGTCCGTTGTAACCAACTCCAGCGGTAGATCCGGTGCGGTGCTCATCGAGGTGCTGCCTAAGCTGGAGATGGTTTCGAGCTTCAACATCGGCGTGGATAGGATCGATCCCTAGAAGTGCAAGGAGAAAGGGGTTAGGGTTATAAACATCATCGATTCCGTCCTTCCTCCAATGGATTCGACTCTTCCTCCTCTTCTATCTCTAGCCGCTGCGTGTTCAAGTTCGAAGCCTACAGAGCA…
>Peanut_newGene_1780	Peanut_newGene_1780.1
ACGCTTTTCCCCTTTCTCAAACACAACGCAGCAATAGTAGGAAAGAAACAAAGAAAAGAGAACCAGAGAAAAAAGGAACAGAGCTGCGATCAGAAGAGAGGATGAGCCACATTGCTGCCGTCGTCCAGCTCATCGCCTCCGTCGCGTCTTCCCTGCGCCGTCATTCACGTTCATTGTTGTCCAGCCGTTCGTTGCCGTTGAGGAGAAGCTGCCGTCGTCGCTGTTTTGAAGGGAGCCGTAGTCATCGCCGTCGAGCATGAAGGGTGTTGGAGAGAGAGAGCTCGCGTCCGAGACTGAAGAGGAGACGTGGTCTGCGCTGCTTTCTTTATCACGATTGGTCCGCCACTGCCACTGCTAGGGTTCGTCACCAAACCACCGTGCCGCCGTAGCTATCTCCAG…
>Peanut_newGene_1784	Peanut_newGene_1784.2
AAAAAATGGGTATAAAATGGCATCAACATAATGGCGGTATTATTAAACCGCCACACTCATAGAAAGCGGTAGTGTTTTGGTGATTTTGGCGGATTTAAACGCCATTACCTGCTCCTGCTTCACTGATATAAAAACACTTTTATTTCACTAATAAACATGGTGCTATTCAATCTAACTTCCATCGCAATGTGAGAACTAAGAAGAAACTCCATCGCAGCATGAGATCTGCGATTTCATCCACAACGCTCTCCTCTGGCAGCAATGTCGTTGTTGCTACCTTCGAAGGAGCGCTCTTCTTTGATTAGGTTTATTGGCTTCGATTTGAAGGTTCGTTGCGCCGTCGCTCATCTCCTCCTCACCACAAGTAACGCCATCATTGCTGTCCTCGGTGGAGCTTCT…
>Peanut_newGene_1786	Peanut_newGene_1786.1
GAGGGATGTATCTCTCTAATCTCTATGTTTCAACAATGGTTAGAAAAAAGGCAGAAGATGCAGGCCCATCAGCAAAAACTAAGGCAAGTAGCAAAGATGTCCCTAAGAAGGAAAAAGTTTCCATCTCGGCCATGCTGGCCAGCATGGATGAAAAGCCTGATAAACCCAAAAAGCCATCTTCCATTAAACCCAAGGCAAAAGCTGCTCCAAAACCTTCTGCATATACTGATGGTATTGATCTTCCTCCATCTGACGAAGATGAAGATGAAGCTCTCTTGGAGGAGGAGGAAGAGAATGCCTCCAAACGGCAGCAGAGGAGTGAGTTGAAGACACTTGAAATTTCAACCACAGACAAAGAGCTGAAGAAGCGTGAGAAGAAGGATATTTTAGCAGCTCATG…
>Peanut_newGene_1787	Peanut_newGene_1787.2
GATTCTTTCCCTTCTTCCCACAAACCCCACTTTCCTTCTATTGTTTCTAGATCACACACAGACAAACACATAATAGCCAAGAGAAAGAGTCTCAAATTCCACTTTTTTTTTTTTAATTCCTTCCTTCTCATAGGTTTTTTTCCTCAGCTACCTTGAAAGCATGGAAAGGAACCAATGGAGTTCATTATAGCTTAGTTCGCTTTTAGAACTTCAAGTCTTCAACATCTTTAACTGAAACTATAACACACCAGTTGTTGGGTGAGTTTCAGTTAAAAAAATTCTATATATACAATTTTATGTCTTATGATTAGTCTATCAATATATACTTTTTGTATGTTACTTCAGTCTGAAATGATTCGTTCACCAGATATATATAATAAAGATTTGTAAATCCTGTAC…
>Peanut_newGene_1789	Peanut_newGene_1789.1
TAAACCCCTTCTTCTCTCAGCATGCATAGCACCCTCAGTACCTCACGAAGGGCGGAACCTTTTCTCTCTCAGCACTCTCTCCATCTCTCACCAAAGACCACCTGCCACCATCACCACTCACAAGCCTCAGAGTCACCTTGGCCCGCGCCAAAAAGCTCCTCTTTTGACTACTTCTCAGTGCTCCTCTGTTTCAATGCTTCTGTCACCTTCACGGCCACAGTGATGCACTGTTTCTTGGTGACAGCAACCTCAGTGACAACGACATCATTAGTGGCCACAAAGTGCGATGGCACTTCTCTGTTCTATTTTCCCAATGTTGTTGCCCCCCGGCCGTCGTTTTCTTCTCTTCCACCATCAGTCCTCGCAAAGGTTAGCCTCGTCACAACTAGAAGCCCCAGC…
>Peanut_newGene_1803	Peanut_newGene_1803.2
TATCTCTCTCCTCAGACACCCACGCTTTCTCTCTCTTTCTTCGCTCTTTCTCTCTCTTTTCTCTTTCAAGCACATAACTTCTCACTTTCTTTTCCTACCCGTCTACGTTTTCTTCAGATCCAACCACAATTTAGATCACCATCACCACCACCACCACCACCAACAACATTTCTTCTTACTTCCGTCTTCAACCACTCTGATAGGTTCACCCCCCTTTTGCTCTCTATGCCATTCCCTCAGTCGGGAAGGGTGTACCTGAACCGGAGTGTCACAGCAGCGTGCAGATATTTCATTAGTCTTGTAGAGCTGTTGGCCTTTTCAGGATGGGCAAGTGCAAGGGCTGTGGGAAGTTAGGAAGAATGAGACCAAGGGATGGATCTATGAGTGCTTATGAATTTT…
>Peanut_newGene_1805	Peanut_newGene_1805.1
CTCTCACTCTCACGATCTCACCGCAAAATCGTCGTCTTCCCGCGTCTGAGGGCTGAGGCAGAATCGTCGTTGCCATCTCTCGTCGGAACCTGAACGTCGGCTCCTCCAGCCTGCTCTTCGTCGCCGCCTCCACCCCGGTCTTCTTCGCAGCTTCCGGTCCAGTATCCGTCACCGCCTCCAGCAAGATCTTGGCCGATTTTCATCGCCGTTGCAGAAGCATCTTCGCCGATTTTCAATGTTAATGGTAATTCTCACAACAATAACAACATCAACTCCTCTTCGGAGCTGAACAACAATGTTTATTCTTCATCTTCTTCCTCCACCTCACCCAAAGACGCGGAAGCTGCATTTTACAGGGAGCTATGGCATGCGTGTGTAGGTCCTCTTGTTACAGGTCCA…
>Peanut_newGene_1812	Peanut_newGene_1812.1
ATAAAGAAAACTGTTAGAAAGGATCGGAATTAGGTGAAAGGGGAGAGGCGGTTGAAGTTGTAGCGTAGGAAAAGAAAGGGAAGGCGAAGAGAAGAGAGAATGGAGGGTCCTGGTCCTCCTGCGAACGATATGTGCTCGGTGTGCCATGGGAACTTCAACACTCCGTGTCAATCCAACTGCTGTCACTGGTTCTGCGCCAACTGCATCATGCTCGTCTGGCACCACGGATCCGCCGTGCAGCCCTGCAAGTGCCCCCTCTGCCGCCGTCCTATCACTCTCCTCGTCCCCACCGACGACTCCCTCAGCCACCGCCATGACCCCGAGGTTGCTAACGCTCTTGACAAGATCCAGAGATACAATCGCTTGTTCGGTGAGCGTGAGGGCGGGCTTCTTCAGCGA…
>Peanut_newGene_1815	Peanut_newGene_1815.2
GTTAAAGTAGTTTGCTTTTTGACATTCTTTCTTTTAAAGGCCTGATAATCATGCTATGATGATGTAGCTTCTTTGCAAAGCTTTCCTATGGAGAAAAATCCTTCGCAAGCTGCAAGTTTTCCTTATGGATTTGAGGCTTTGGTCACAGAGGTATGTGATGAGACTCAGATTGCTGAATTGAAAGTAAAGCTGACCTTTCTCGTCTCTTGTTTTCTGCTCTTGTAAAATTTGAAATCACTTTCAGTATAAATGAAATGAATGTGAGACTGTATCTTATAGGCTATAGGAGGGTATGGTTTTCTGCTTTCCCTTTTACTGTGTCTAATTGTTTGGTATGAAATTATTTGGGATTTTCTATTGAAATATGTAATATAATGCAGCATGTCAAAAAATGATGTT…
>Peanut_newGene_1820	Peanut_newGene_1820.2
GTGAAACCCTAGAAACTTGTTTCTGTAGAATTGATTTGCTGGGTTCATCAACCTAATATCAATCTTCTAATCTTTCATAACTCTTGAAACCATTCTCACATGGTATCAAGAGCACAGGTTCAGATCCATGGCTCTCACTCTTTCTTCAATCAATTCCAAGAATTTTCTTTCCTCAATCACAGACAAGCTCAATGAATCGAATTATGTAACCTGGCAGCAGCATGCCCTGTTTGCTTTTGGTGGACAGAACCTAGAAGATCATATTCAAGAAGGCAAGGCACCGCCACAATTTGAATATGATGCTGCTCAAGCTGCTGGTACTATTTCTGCAAAGTATACTGATTGGATTCAACAAGATTACAATTTGTGTTCTTAGATTCTTGTGCCTGTCAATCCATC…
>Peanut_newGene_1828	Peanut_newGene_1828.1
CAGAAACATTGATGAATTTCCAACCACCTACCTGGCCGACACAGTATTATACTACTAGAGAGGCCTCAAGGTTAGGTATTCATGCTCTTCACATCTTGTACATGTATGGAATCTATCCTCGCTGTTAGTACGGTATTGTGCTTAAACCTGATCCTATTCGCTCTTTTTGACAATTACCTTAGCTACTGGATTAAGTCATTGCTCATTTGCTTGCTACTAATTCAATTTCTATTTTTAATTTGCTTGAGAGAATGATTGGAAATTTGGAAATGGAATATTAGGTTCATTTCACTGCGTAGTACGGTTTATATACAAATAAAACATAAAAAAGGACACAGGAAAAGCTATACAAATTGCTGAAGTTGAGGGTGCTAAATAATAAAATTGAGGTGATGGCGG…
>Peanut_newGene_1836	Peanut_newGene_1836.1
CTTGCAGCAGAAGACCACCACTGTGACTCGGTGAGTTGACTCGGAAGCATTCAAGAACCAGGAGAAGAGTGAAGCAGAAGAGGAAGAAGAAGATGATGGATGAAATGACCAAGAATCAACCTTCACACTGGTGGTGGCTTGAAACCACCACCACTAACCGTTCCCCGTGGCTTCAATCCACTCTTTCAGGTTCCAATCTTCATTCCTCTGTATCCATCCTTATTAATTTGCATGGTCAAAAACGGTTGCAATTTTGGACAAATTCGTAAGTTGTAACTGATAATTTGTGATTATTAGATTGTCTTGTAACTTTTTATATGCATAGAAAGTCCTTTGCCCATCTTGTTTAGCCTCATCAGTGATTTGAAATTAGGAGCATCTTCTTGTCAAAAACTAGC
>Peanut_newGene_1838	Peanut_newGene_1838.1
CGAGCTCCCTCCGCCGCCGCTCGCTCGCATGAGCTCCCTCCTCTGCTGCTCGCGTTACACGAGCTCCCTCTGCCGCCTCTCAGCTTATGTCTCTCTCTGTCTCGCGCCATCCATCCTCGCCGTTCACAGTATCGTCGAGTCATCGTGTCACCAGATCTAAAACCTACATGTTGGGACTCCAATTTGTATTCCTTCTAGAGACTTCATTGACATTGGCCGCATTGCCTCCATTGAAAATAACCACACGCCAGTTGATTATGCAAAGAAAGGGCTGAAAGGAGCTATTAAGGTACATATGCCTACAGAAAATTGATTTTTCAGATCTTAAACAAAATATACTACAAAATATCTTAAACAATTTAAGCCTTACCTATGGTCAGTTTTTGGCTGTGTCAGCGA…
>Peanut_newGene_1862	Peanut_newGene_1862.1
TCGGGTTCTAGCCCATATTCCTTTTCTTTGCAGTCTTGTCATCCCTTGACTCTCTTTTCGGCAGAGAAAGGCAACAGCTTGTTGAATCATTGAGCAGAAGAGGAATTTTGTCCTAGCTAGCTTCCTTTCTTGGAATAGCATAGCATGCACAATCTCCATGATGAGCAGCATCACCCCATGCGCCAACTTCATCACCGGAAGCGGCAACAACAACGGCGGTGTGACGCCGCCATCAAGCACGTGCTGCGATTCATTGCGCGATCTGATGAGTTCCAGCATGGATTGTGCTTGCAAGGTTTTATCTGCAAATGCTCCAAATCTGCAACTGCCCATCACACAAGCTGTTGCCATCTCCCTTGCAACCGCATGTAACATTAATGGACTCTCTGCACACTGTAA…
>Peanut_newGene_1867	Peanut_newGene_1867.1
CGTCACATCTTAAAGTATATGTACTATGTACCTTCCCTGGCAACACTCCTCCCCATCCAACCCCAATAATAATACACTAAGGAGGAAGAAGAAGAAGAAATGAAGAATAGTTTCGTTGATCATCGTCATCATGTGGGTTTAGCAAAGAGTTGCTTACAGAGTTTATTGGCATTCTGTCCACCTCCTTTCCTTTCTATCTTTTCCTTAGCTGAGGGAGGAGGTGGGCATGCTGCCAACTGAGTTCTGTTGCCTTCTCTTTGTAAATCCCTCCTGATATCTATCTTCTTTCCCAACAAGTAAGGTGATTTGATATTGTATCTGCCGCGATGATCTATGGTGTTGATAATTACTAGATTGGATTGGATTACCAACTGATAAAAGGAGGAGATTTGATTTGAG…
>Peanut_newGene_1876	Peanut_newGene_1876.7
GAACTACTCCGTCTCACACAAACACGCTATACACATAAAGAAGGAAAAATCAGAGAAGACAGAAGGAGGCCGACCACCGCGAGGAAGAAGAAGAGGAAAAAGAAGAGAGGGAAGAGGAGAGGCTCGTCGCGCCGTCGCTGTCGCCAGAGGGGATTGCTTCCGCCCTGACCGCCACCCAGCCGTTGCTTCCACCTCGGCACCGGCGTTGTTGCGGTTGTGAGCGTGAAGATCGAACAGAGGGAGAGAAACCGCGAGCGAAGGGTGACGATGGGGCCTCTATCACTGCTGCTACCACCAAGCGTCGCCGCCGCCGCCGCCACCGCCGAAGGCCCTATCGTCGTCGTCAATTCTGCCTGGATTGCCGCCATTGCTGGAAACCACTACTGGAGCCGCCAGCAC…
>Peanut_newGene_1884	Peanut_newGene_1884.2
GCCTACTAAGGGCCCAAAGGACAACAAGTAGTTAACCACCCAAGCCCCACCATACCCAGAGAGCAATCCCCATCAAATTCTTCTGCGCCGTTCTTCATATTGCTCCTAATGTGGCCAATGATGCCAAAGGAACTGAGAACTAGTGCGTCATTAGCTTCAATTCATATTTCAGAGATTCCATCTACAAATCATCAGATTGAGAGCTGCAAGTGTTTTCATGCATATCCACTACTTCAGAGGTCTTGTTCGTAGCCATCATTAGATGAAGAGGAGCCACAGGACCAAACCTAAAAAAGGAGTAAACTATCACAGAAGATGACCGAGCCTGGTCACATAGTGTCCTATGTTGTCTTCCTTCCGATTACATGCATTCCTTCAGAATAGTAGCCGCACATGCAC…
>Peanut_newGene_1885	Peanut_newGene_1885.1
GACGGCCGATGATATTATAAACCAGACCTTTGAAACATCAGATGCAGCTTATAACTTGTATGTACGTTATGCGAGGTGTCTCGGGTTTGGAGTTCGCAAGGGTGATACAGCACGTGGAAAAGATGGAACACAGCGCAGAAGGAGGTTTTTTTGCAGCAAGGAAGGAAAGAGAGCCGAGAAATACATATCTAGTTTGAGTAGGAAGCGGGAGCATAGAGCGCTGACTCGCACTGGTTGTGAAGCCATGCTTGCGGTGTATCTTGACACTAAAACTTCGACTTGGAGGGTTAAAAAATTAGTCGAGAAGCACAACCACGATCTTGTCCCATAATGCTTGGTACACCTAATTCCAAGCCACCGAGGGTTGACTAAGCCACAAAAAGCTCAGGCGAATACCAT…
>Peanut_newGene_1888	Peanut_newGene_1888.2
TGGACACTCCTTCATATTACCCTCTCTCACTCCTTCTCGTACTCCTCTCCCTTCCGCCTCTTCTCACATTCTTCCTCCTCCGCCGCCGCCACTCCTCCTCCAACCGCCACCCTCCAGGACCACCAGGATGGCCAATTTTTGGCAACTTATTCCAGCTCGGAGACATGCCACACCGCACCCTCGCCAACCTAAGCCATACCTACGGCCCCGTTGTGCGCCTCCAGCTGGGAGCCATCAACACCGTCGCCATCCTCAACGCCAAAACCGCCACTGAGTTCTTCAAGTCCCACGACCACAACTTCGCCGACAGGACAATCATTCAAACCATGCGAGTCCACAACTACGACAAGTCCTCTTTAGCCCTTGCCCCTTACGGCCCTTACTGGCGCCTCATGCGCC…
>Peanut_newGene_1892	Peanut_newGene_1892.1
CTTTCCTCCCGTCCCTCATTCTTATCTCCTTTCTCAATTCCCATTTCTCAATTCTCAATTTCCACCGCCACTCTCTCTTGTTAATCAGGTTAACTTAAAGAGGCTTGATCGAATCGGAAAGAAACGAAAAGAGAAGAGAAAGAAAGCGCACACAGATCGAGAAAAAGATGGCGGAAGAGCACCGATGCCAAGCTCCGGAAGGCCACAAACTCTGTGCCAATAATTGCGGCTTCTTCGGGAGCACAACCACCATGGACCTCTGCTCCAAGTGCTATAGAGATGTTCTCTTGAAGGAGCAAGAACAAGCCAAGACCAAATCCACCATCGAAACCGCTCTCTCCTCCTCCTCCACCTCAGCCCCAGCTCATCCATCTCCGCCGCCTCCAGCCGTAGATTCCC…
>Peanut_newGene_1897	Peanut_newGene_1897.1
CACAAATCTCTCTATTTCATTGCCTACATTCTGAACGGGTTGACTAGTTGTTTGCACTTATTAGATTTATTACAAGATTTAACAATGACTAATTTGTTTCCATAAACTAATGATAGTTAAATCTTGGTCATGGTTTTTTTTGTTCTATTTTATTTTAAGAGCTAATATGTGTCTAAGTTTTGTGCTAGCAGAAAACAAGTTCGCAGTGGGAAGTGGAGCCAAAACTATTTGTCTAAGCTACTATGAGCAGGAAGCAGATGATTGCTTATATTCAGAAGTTATATATGCTTTTCTAGAAGCAAATGGAATTGGAAAAACTCATTTTGATTTCTACATTTCCTATGGGTTGCACTTGGAATCTAAGAACAAGATTAAAACTGCTAATCGGATATTGGAACT…
>Peanut_newGene_1899	Peanut_newGene_1899.1
CAGCCACAGCAGCGACGGTTTTGACCACAGTAACCACAGAGATCGTAAAGGCGCGTACGGACAAGAGGGATTACAGAAGGATCATCCTTCCCAACTCCCTTTAGGTCCTTCTCATCTCCCATCCCGACACCGACAAGTGTGCTGTTTCCATGGACGTTGGAGTAGGTTGCTTCAGCAACCCTGCTAGCCTCGAAGGCTTTGCCCATTTCCTAGGTTTCTTTTTTTTTCAATTAAATAATTTATTCTTTTTACTCGTTGTATGTTGATTTGGATTGGATTCTTTGTTTGCGGTTAAATGTGCCCTTTGAATCACGTTCATCCAAGATAGGCAATTATCATATTTAGCTTTGCTTTAGTTAAAAATTATAATAGGAAATTAATGATAGAAGTTATTTATCG…
>Peanut_newGene_1901	Peanut_newGene_1901.1
TTGCCGGAGTGGATCGGAATTTGCCTCAAAGATATGATATTGTGTTATATTTGATATAATGCCCCAATAGCTCTGTTCTTTTCCTTTTTTCTTCAAAAATTAAAATATAAAAAATTGTTTCCTTTTTTCCCAATGTTTGTGGTTTTCTGCGGTTGTGATTTGTCTTATAGGAGAATGTGGGGTGTTATGAAGTGTGTCTGGTCCTGATTTTGAAGAATGCAGAGCCGGTATTGCAAATGGGATTGGGTGCTGCAGAGGAATCTTGTCTCCAAAGGCCTGTATAGTTCAAGTACTGCTAGAGGATGTGAAAGAACGAATGGCACATCGAAAGAAGATCTAGCTTTGAAACTGAGTCGACTTCCATCGATGTTTTTTGTCCCGAATGACCCCTCAGAACAG…
>Peanut_newGene_1906	Peanut_newGene_1906.1
CTTCTTCCCCAGCAAACCAGCCTGATAAGAAGGGTAAAGAGAAAGTTAATTTTGATGAAATGAACAAGGACAAGCAGATTCTAGTCAACGAACCAAACGTTCCAAACAACATGAACAACAAGCGCAAAGCAATCATGTTAGGAGATGATCATGATCATCCTAATACCGATGGTTCTGCTGCTGTTACCGAAGATGGAAGTGATTCCACTAAAGAACAGGAGCCCAACTCTGACAAAACTCTCATTATTGGTAGCCAGAATTCACAAAAGAAGAAAATTTCATACAATTGCACCTTTTGTGACAAGAGCTTTTCTTCCGCACAAGCTCTTGGGGGTCACCAAAATGGTCACAGAATGGAGAGAATGCAACAGTCCCATAACAAAAATAGCAGTGTAAATG…
>Peanut_newGene_1919	Peanut_newGene_1919.1
GTCCCAATCTTTAGTTCTCGCTTCCCTGATAAGTGGAACATCATTAGATTTTGAGCACTTCACTGCTCTAACTTGCAGCCCAGGATATTTTTGGATCCAAATAGGATCGACACAGAATCTGTCCAGCAAACTCGCACATCTTCCACTTCTCCAAGTAAATTTTCATCCGCATAGTGGCAAAATTTAGAAGGCTATCTGTTATAATTATGGGATTGTTCTTCTCTCTAACTACACCAATAGGAATTGCAATTGGCATAGGAATCTCTAATGTTTATGATGATAATAGTTCAACAGCTCTTATTGTGGAAGGAGTCTTTAATGCAGCTTCAGCTGGAATCTTAATCTATATGGCACTTGTAGATCTTCTTGCTGCTGATTTTATGAATCCAAGAACGCAAA…
>Peanut_newGene_1924	Peanut_newGene_1924.1
CATTTAGAGACTCAATCCAAAAATATCAATATCTCTCTCTCCCGTCCGATGGAATCCAAGCTTACACATATAACTAATCGGGTTTATGAGGATTTTGATCCTGTATGCAAATTGCGTATAGATGAGGCCCGTGACACCATTGAACTTCATCTTCCAGGTTTTAAAAGAGAACAAATAAGAATTCAGATAAACCACCTTCGAATGATGATTATAAGTGGAGAGCGTCCCTTATTGGATGGAACAAAATGGAAGCGTTTCAAGAAAGAGATTAAACTCCCACCCTTTTGCAACGAAGATGCCATTCATGGCAGTTTCATGCAAAACATTCTCACCGTAGTAATGCCAAAGAAAATCCCTCAATCTTATCGAGAAGAAGAAGAAGAACAAGAAGAATTTGAA…
>Peanut_newGene_1935	Peanut_newGene_1935.1
CACACACAGTAGCAGTGAAACAGAAAACAAAGAAAGAAAGGGAAGGGGAAAGCAGAATCAGGGAAGGGGAGAAGAGAGGGAGATCTGAGAGACGAAAGATTCAGAGAGGATGGAGACGCCGTCATCCTTGTCGCCGTTTGTGGAGCCGCGAGGAGTGTCGCTGTCGAAGCCACGCCGTTCGTCCCTGCCCAGTCGCCGTTCTGCCGTCCATCAACCACGTTCCGTCGCCTGAGAAGAACCATGAAGATGAGAGAGAGCTCGTGTGCGAAAGGTAGCGGCGCTGTGCCTCCGTCACGCCACTATCACCGTCGAACTGCTTTGCTGTTGCTAGCTCTGTCACGACTAATCTGCCGCCGCCACTGTTAGAGTTTGTCACCGCCACTTTTGCCAATGCCGGCG…
>Peanut_newGene_1936	Peanut_newGene_1936.1
AAAGAAAGAAAAAGGGGCATCTTCAAAGCAACTCAATCTAAGAGGAGAAATGTGTGCATGCTTTGCCTGCTCGTCAACTACAAAATTAGCTTCCCGAAATATGTGATTCATATGAAAATTTCCAGGTTTTGTTAGAAGTTTTTTTATCGCCTTAACCAGAGAGGTACTCGAATGGAGAAAAGTAGAAGTACTGTGAATAAGTTTGAAGGCGCAAAATGAATCCATCTCAATAACAATCATCCTCAGCCCCAAATTAATGGCGACTTTTAGTTCCACATAAATTCCCTAGAGCTCAGTCATGGTTATGGTGATGGTACCGTTGTTAAACATAAAGCCAGCCTTGAATTTTCATTTTGCACCTCTCAAAAGTCCTCCACAAGCATTGTTTTTTAAGTCCGT…
>Peanut_newGene_1937	Peanut_newGene_1937.1
TACTACTTGATTGCGTGTAAAACAGTATCTAAAGTAGAAACCGAGTGGTGCTTCTGCTGCTTGGTATTCTCCCCCGAAAACCCTAACTTAATCCCCTTTCTGTCATGGCCAAACTCAACGACCCGCAGGAACCCGCCACATTCCCCTCAAAGCGCAAGCCCGATGATCCAATTCCCCAAGAACCCCTCATCAAAACCCCAAAGCTCTCAACTTTCGACTGCAACAACAACTCAATCAATCACCTCACCGATTCCGAACCTCTCGCCGAGAAGGAGAAATCAGAAACCGATGTCGTTCTAGATAAGGAAGCTGGGAACGGCGACACTAAGCTTCGAAATGACGTTGTCGACAATGATAAGGAACACGTGGTAGAAGAAGAGGAGTATGATGACGACGACG…
>Peanut_newGene_1940	Peanut_newGene_1940.1
TTGGATCTAAAAGATGGGTTACTAACAGTGGATATACTTCGGTTGATCACATAGTTTCTGGTTTCTACTCATACCCTTACCAGATTTTGCTGCATGCATGAAATCAAGGAACTTGCTTTTCATGTTCTTCTCATTTTGGATTTGTTTGTTGATCCAACACTTATCCATAGTATCTTGGATTATAAACTGTTGATTACTGTGGTTTACATTTGAGAACTTGTGTGTTATGAGCTGTACCCTTCAAAATAATATCTGTCACATGTTTTGCCAACTGTTTGTTGATCCAGAAAAAATAAAAATAAATTGTCCACATTTTGTGTTGTTAATGTGCTATATGATATAAGATCACATGCTTAGTGTGAAGTTGGTAATTTAATTGCAGGTTCTGATTAATACAAC…
>Peanut_newGene_1941	Peanut_newGene_1941.1
CTTTGACATCCAGTCCACAGCTCTATTCCCATCCCTATATGTATGAGTATACCTCAACTGTCACTCCCTTCTTCTAAATGCCTCTATGCTTCTAACAAGCATATTTGGGTGTTTTTCATTTCTCTCCCCTTGCTGAATAACTTCCACCAAAGGTTGAGAGTTCAAATCCAAGATCACTTTCCTAAAACCCAGGTCCTAGACTGTTTGCAATTTTTGAAGAGCACCCCATAATTCTGCTTGAAATGCTGTGCATGTCCTAATATTCATCACAAAATCCGTCATCCATCTTCCCTATTCATCTCTGCACACTCCGCTGCATCCCGCCTCTCCATCCATCCCCTCTAATGCTCCATTTACATTAACCTTTATCCAGCTTGGCGGCGGTGGAATCCAAGATAT…
>Peanut_newGene_1944	Peanut_newGene_1944.1
CACAACCAGCCTTGCGATATTCTCTACCATTGACCATAAAAAACCATGCCTTTCTTATCTAGAAAATTCCACTAGCTGGCTCCGGATAAAAAGGAGGACAAAAGATTTAAAGAGAAATTAAAAGGGACCTAAGAAATAAAATGAACAATTGGGCTCCTCCATTCATAGCTGCAGCTCTATTTTGGTTGTTGTCGCCGGGAATGATCTTTCAGTTGCCGGGAAAGAACTCGCCTTTCGAATTCATGAACATGAAGACAACTGTGGCATCCATTTTTGTGCACACTGTAATTTATGGTCTGTTTCTCATTTTGTTCTTCATTGTTCTTAATGTTCGTCTTTATATCTAGCAGCCATCCACAACTTTTTTACTTTATTTACTGTTAAGGACATTTTTAATTA…
>Peanut_newGene_1945	Peanut_newGene_1945.1
ACTAACCTCACAAACCACCATGCCCTAGCAGAGACATTATAGTTTTTTTGGGAATCACCGGAGAACATATTTGCCACTGTTAGACACTAAACTACCGTTAGCTCACTGCAATCAATGTTTTCCCTCCACTACCACCGCTGGTCGCCATCCCCAAATCTATTTTTGTTTCATGCTACAGGTTCAGCCACAGAGAGAAATGGCCACCACAACATATATCACATTAGTAATTCACCATAAAAGGAGACTTCAAAGGGGATCAGATGGAAAGTTGTCATATATAGATGGTGAAACTACTGAAGTGTAGAAAGTAAATGTTGATATATTTAATAGGTTTTTCATCAATGACCTACTTAAGGACATAGGTTATCCTTTGATATCTGACTTTTATTGGCTACATCC…
>Peanut_newGene_1950	Peanut_newGene_1950.1
GCATGGGGTACTCCATGCTGCATCGCAATGGATGTTGTATCTTGGATCGAAAAATCATACAGTTTTCAAATCTGCTATGGATGGAATTCGCAATCTTTGTAGCCAACTTAAGGAGCCGTTGGGACAAGCCACTAGGGAAAAAAAAGACACATATTGAACAATTATAGATCTTATCGTTGTGAAAACTAAAGGAGCCCCCGCTCAAGAGGACAAAAGGGAAAAAAGAGGAAATGTACCAACTGCATGAAGGCCGGCCACACTAAACGAAAATGTCTTCAACGGAACACCAATTTCTTAAAAGGGGGTAGTGAAGATGATGAAGAAGACGAGGAATCAGTTGTAAGACTAGCCGATGAGAAGGTTTTAAAAGGAAAAGGGCATTTACGAAGGAGTAAGAGG…
>Peanut_newGene_1952	Peanut_newGene_1952.1
GAATAATTGAAGGACTCATTCTTATGCTTAATTTGAATTTTGTTCTATGTTGAAAATGTGTATATCTAAAGTTCAAAATATGACTTTAGTCCAAAATTGTGCGAGAAAAGTTATTTTGAGATGGTTATAATGGTTTATGAAAGCTTGATGTTTGAATGTTTAGATGTATCAAATCATCTGTTGCATGTGGTTTTACTGAATTTAACAAAATGGAAAGAATAATGTTACCCCTTTGTTTGTGAATTTTCATGGAAGAAAGGTAAGGGAACTAGTCTATTCTTTAAGCTGTCAATGAAGAAAAGTGAAGGGGAATTCATTTATACGACTTGTTATTTACACTTTTTCTGTGTTTTTCCTGTGAGACAAAATACAAATGCAGCATACTGGAAAAAAAAAGAA…
>Peanut_newGene_1954	Peanut_newGene_1954.1
CTTTTCTCAGCGCCGCCTCCTGTGTTAAATTTTTCTCCGATCCAACGTTGCTCATCGTCCGAATCCTCCAATGAAGCTGACAGGTTCACCGTCTTCGTCGAAGCGAAGCCATGGCGTTGATTTTTTATTTGGGGGAAAATGCTCCGGATAAGCTGCTGCATTCAACTTTGCTAAGTTGGAAAATCTCAAAGTCCAGGGTGTTCAATTTCCCAGAAAGATTATGAAGTTAATTTGATATTTGACTCTTGCAAGGAGAAAAAAAGAGATGCAAAAGCGATTGTCATTATTGCTGGATGATAATCCTGCGATCATAGAAAGACGTGATACTCTTGAAAGAGGCTCGAATTATATTGGAGTATATAATCTGAGATAGATGCAATTATTTAGTCTAAGTAGATA…
>Peanut_newGene_1961	Peanut_newGene_1961.1
CAAACAAACATCATCTTTTCTTATGTGATTAAGTGCTTCGTTTCTGCTGATTCTGTCCTTATATTATATAGTAACTGCCTATCTCTTTGTATCTAATGCACTTACGCTTCTAATATTACTTAGCATTGTAGGATGCTTTAGTTATTATTTATTAACTATAAGATCTCTAGTTTAGTTGTGCAATGCTTGCTTTATTGTATACCTTTTTGTCTTCCTCTTCACTATTTTATCTCAGATTTTAAGTTTGATTGCTATTTTAAGAGTTGAGAAACTGAAGCATGGATTTGGCATGAAAGTACCTAGACCAGCTGCATAATTAAATGTAGAAACAAATACTGTTGCAGGTTTGGGAAGATGAATTTTGTGCCTTCCTTGTGAATACTCAGCAACGTTATTTGG…
>Peanut_newGene_1970	Peanut_newGene_1970.1
ACCCTAGGCTAGTTCTGAACTCACCCCACCCAATACTTTTGACAACGGCACACCACCCAGGCACAGCGCTGGCAGCTCAACTCGTTTCACCGCCGCCGTCGTCGTGCCTCTCGCCGGATACTCCGCATCGTGTGGTCACGAGTCGCGTCTCGCCTCCCTCTTCCGTCTGTGCTGTTTGCTCGGCCGCTCGCGTCTCGCCGCGCCTCCGCCGGTGAGTGCTCGAGCTGTGCTTCCTGCAGCCCTGCAGCGTGTCGTCGTCTTCCGCCATCACAGCACCCATCCCCCCCCCTCTCCTCTCTTCCGTGGTTGTTGCTGCCTGAACTGCTGCTCCTCGTCCATCTTCTGCCTCTGCAACATCAGTCGATCCAGAAACCGCTTTGGACTTCTGTCACAACGGTG…
>Peanut_newGene_1977	Peanut_newGene_1977.1
CTTGTCCTAACACATCATTTCCATCCACAACCACATAGCCTTCAAAAAAAAAAAAGGAAGAAGAGAGAAATTATTAAAGATGTTTTATTCAGAATACAACCCACCACCTGAAAACATGAGAGCCGAAGTAAAGAAATTATTGAAAAAAGCAGATAAAAACAAGGACGGTTGTTACACAAGGGATGAACTGAAGGAAGCTTTTAAGAATCTTGGTTCCAAATTCCCTTCATGTAGAACCCAATTTTGTCTCTGGAATGTTGATGCCAACCATGATGGAAAAGTAAGTGGTGATGAAATTAATTCACTTATTGACTATATCTTTGATCGTCTCAAGAATGGTCACTACAAGCTTAAGGACCAAGTTGCATGATGCATGCACCCATAATAATTCTCTTGAGA…
>Peanut_newGene_1980	Peanut_newGene_1980.1
TGGGAGAAAAAATGCTGATAGAATTTAAGACATATTGGGAGGAGTATAGTGTTGTGCTTGGACTTTCAGCAGTTCTTGATCCCCGGATTAAGCTTTCTTCTTTGGAGTTTCTCTTTTCAAAAATTGATCCTTCTACAAGTCATGAGAAGACAGAGCATGTGAAAAGAAAGTTGTATAAGCTTTTTGAGGGATATACAAGCAACAACAACATTCCCTCTACTACTTCCAATGTGCAGAGTGCTACTCCAACTCGTTCCCATCCTGCACCATCAAGTTCAGCTGGATTAAATGAAATGAAGCAGAGAATGTTTGGTGCATTGAAACATCATGAACTTACACTCAGAGTTGGAAAGAGTCAACTTGATGTCTATCTGGATGAACCAAATTTAAACTTTGATT…
>Peanut_newGene_1987	Peanut_newGene_1987.1
NTTCCTTTATATTTAACCTTTTGATTTCTTCATGAACATAAGCTACAGGGTTCCCAAAGAGAGAATGAGAAGCTAGCTAGGGCCATAGGGAAACAGTCCTTATTACTCAGCATTTAGCATTTGCTTTATTTTATCACCCTGCTTATTGTCATTGATACTTGCACGCAATGTGTACTTTAAGCACACACGCCTGCGTTAATTGGCATAGAATTTGGTATTTCTCTCGTCAATTTGTGTAGGTTTGAAATGTTAATATGATTCAGACAAATATAGTTATGATGGTATCCATATTATTGTCCTCACCGGTGTTCTAAAATGAGAGTAGTTGCTGTAAAGTAACTGTATGAGGAGTGTGCGAACGCTACATATGTTTTGAGTGTGAGATAAAAAAGTGCTCAG…
>Peanut_newGene_1988	Peanut_newGene_1988.1
GAAGGAGCGGAGCATGGCTGCACTTCATGGAACATTTGAAGAAGGTTATCGTCTTCTCCCTGCATACTGCCACTTTTAGAGCTTGACAGAGCACATCTTAAAGGGAAGTTCTTGGGTTCATTGCTTTGTGCTGCTGCTGTTGATGCTGATGATGCATTGTTTCCCTTGGCCATTGCTATTGTTGATACTGAAAGTGATGAAAACTGGATGTGGTTCATGTCGGAATTGCGAAAGCTTCTTGGAGTAAACACTGACAACATGCCTAGACTGACAATATTATCTGAAAGGCAAAGAGGCATTGTGGAGGCTGTAGAAACACATTTTCCCACTGCTTCCCATGGTTTCTGTCTACGCTATGTTAGCGAAAATTTTCGCGATACATTCAAAAATACAAAGTTG…
>Peanut_newGene_1990	Peanut_newGene_1990.1
GTGACGACTCTTATTCTCCTCCAACGCCCAAGAGTAGAGACGAAAACGGAGTCATGGTCACGGAGAGAGGCAGAGAGCAGAGCTTCTTCTTCTCCGACTCCTGAGAAAATCCGCCGTCCTCTGCCTGAGAGCAGAACTTCTTTCTCTTCTTCTTCTTCTTCTCCTCCGCCGAGTCCGCCTCCGCGCCATCCTCTTCATACTCGTCGTTGTGATCCCGTCGCCAAAGCACGTCGCTGTCGCAGCTTCTTAGACTATTCAAAGACCTATGCTCGGTCCAAATATTATGACGAAGCAAAACCCTGGAATGAAAGGTGTGATGTTGCATTTTCTTGTGCTTCGCAGAATGAAATTGAACAATCTGATGCCATTAATTTGGTTAATGCAGGTTGTCGTCTACTA…
>Peanut_newGene_1992	Peanut_newGene_1992.4
ATCATATCTAATAAGATGGAAACACATAATTTTGTTGATTTGAATATAAGGCTTTTGAAAATAATGGTTAATCATAAAAACTTTATAGAGATACAAACTACTCCTTTGTGTGAGTTAACTTTACAGAGATACAAACTACTCCTATTTATACATAAAGCTAACACTCTTATCTTAACTAACTAACCCTTATCATTGGTAATTACATTCATAAAGAACTCTTATAACAGGTACAGCTGTGTGGCCAAGTCTTCTATGCCATAGTTCTATTGGGTTATAATTTTGTTTATTAGTTAATAAAGCATATTTAGATGAATCATTGATATTAGGTAAACCGGAATCAGACTTGCAAAGAGTAAGAATAGGAGTAACACATTTAGACACAGGGCAGAATGAGTTATT…
>Peanut_newGene_1993	Peanut_newGene_1993.1
GGGGGAGATGATAGAGTTTCAAGGCAGATAATGTCACTGTACCTGATGGCTCCAACCTTCAGGGGAGTCGTCGCGGTGGAAGGGACAACAGTGGTGGTGGTAGGGGTTATGAAGGTGGATGGGTGGCGACGGCGGCTATGGTGGTGGAGGAGTCTAAGGCAACATGGGTCCCAGTGGTCGCGGTAAAGTTCGTCGCGGTGGTGGATAAGGTGGAGGATTTGATGACGGTCGTGCATGCTACAGCCGTGGTGGAATGGGTCAAGGACTGCAACCAGGGAGGAGGCAGATGCAGAGGCAGGTTCGGCGGCGTTTGTGCCAGCGGAAGCTGCTACAACTATAGGGAGGCGTCTTTCTTCGTTGATGCAGAAAATCCAGAACAGGATTCTGATTGTCCCTTGC…
>Peanut_newGene_1997	Peanut_newGene_1997.1
GCTTGTTGGTTTAAGCTTGGGCAATGGGAAAGATCAATTGAAGACTCCAATCATGCTTTGAAAATCCAACCTAACTACACTAAAGCTCTTCTTCGAAGGGCCGCATCAAATAGTAAGGTGAAGTATATGCAGGGTCGGTATGTGTGTTGTTTTTTCTGGCCTAGTGCTTGCTCTTTGTGTTGCTCTCTCTCTCTCTCTCTCTAATACGGTCGTAAAGGTTATTTCCGGGCACGGATCATGGAACCTTCTCGAAGCTTCTTCCCTCTTACTGTTCCAATTTTGCAAAGCGTTCGTCATCTGCTTCTTCTCTTGCCACCGCTCTGCTGTTCTTCGCTGCCAGTGCATATTAGGGGGGGAAAAAAGGTACAACAAAGAAGCAAAAAGAACCGTTGTTCCAAT…
>Peanut_newGene_2009	Peanut_newGene_2009.1
GCAAACCCAGATCCAGGCGGCGATAGCTCGGTCGCGGCTGAGGAAGCAGCATCTCCACCGTCGAGTCTCTCCGTCACAAGCATTGCCGCGCCGTCCTCTTCTCCGAGCTCTGTTGTTTCGCCGTCCTCTTCTCCAGCCCTCCCCTTCATGGTACTTTAATTAGGTGTTGAAGTTTCCATCTATGACCAGAACGTGGTAAGACTTTGGGGAGCTTCACCCCAGAAAACACAAAATTTGGTATTGGGCTTAGGTTCATCATCCATCATCGATCATCTCTCCCTTCACTCTACTTAGTCACTGATCCACACCATCTTTGCCGACGACGGGTCTTCTGGCTTCGTTGACCCTCTCTTTCTCTTTATCCATTTATTTCCCATTGCCATTTTGTGCCAAAATGAC…
>Peanut_newGene_2013	Peanut_newGene_2013.3
GAGAGCATCAACGAGACTGAATAAATCTCCTTCCGAAATAGATTTCAGGAAAGATGAAAAGGTACAGAACTACAGATTTTAAAATCTCTGTGTTGAACTCTTCATTTCAACGGATCCTGCTGTTCTTCTTAGAGGCCCTAAGAATGCCCGAGAGGCTGTCAAGCACTTTGGACCAGCACCTGGTGTGCCCCATAGTCACACCAAGCCCTACGTTCGTTCAAAGGGACGGAAATTTGAGCGTGCTAGAGGAAGAAGGAATAGCAAAGGCTTCAGAGTTTGAGTTCTGGAGCTCAAAGATGGAGGATTTTCCTTTTTATCATGTGACCATTCTGTATTGTTTTCCTTTTTGTGTCGTTAAAACAGTTCATTTTAGTTCAGTTTTCCTTCCCTCAAAGGGGA…
>Peanut_newGene_2025	Peanut_newGene_2025.1
GGGGGGAGGGGTATACGAGAAGGCCCTTTATTTCTTCGTGCTATATATATGTGTTGCTCAATTTGTCACAGGAAATATACTTGTAGATCACTTCATGCCTCAGCTCAGCTCCACAGAATTTTCAGAAGCAAAAAAACTTGGTCATCTCAATTCATGTTATCATGCATCTTCCATGTTCTTCAAGAGAGAAACAAGGCTAAGTTTGAATTTTTTTCCCTTCCTTTTTTGGATCATCATACTTGGTGTGCCTGGCTCCCTGTATGCCATTTGTAGAGCTCGTCAAAACGTTGACAGCCTTAACAAATGGCGTGCGAGGAGCCATGCATGCTGTATGTTATTATTAATTGAGGAAAAGGCCAAGTGTGGTTATTATTGGTTTTGATCTCCTTTTGGTCCATT…
>Peanut_newGene_2030	Peanut_newGene_2030.4
GCTCGCTTGCACGAGCTCCCTCCGCCGCCGCTCGCTCGCATAAGCTCCCTCCTCTGCTGCTCGCGTTGCACGAGCTTCCTCTGCCGCCTCTCAGCTTATGTCTCTCTCTGTCTCGCGCCATCCATCCTCGCCGTTCACAGCCTCGTCGAGTCATCGTGTCACCAGATTTGAAACCTACATCTTGCTCTAGGTGCTGTAAATTCAGAGGTTCTTCTTAGAAGGTGTTTGATCTAATGACTGAACTGATTTCATTATCCCTAGCCCTAGCCTTGTCCCTTCCCTGTTGTTGCTGCAGAGAACTGAGTTTCTAAATTCTAAGGTCATAAACACACTAAAGAGGGATCAAACAAACCACCATGACTTAACCTCACCCATTCACAGGTGTGAGGGAGTGGAAAA…
>Peanut_newGene_2035	Peanut_newGene_2035.4
CCGAAGTGAAATTTTGTTTGCCTTCGATCACCTCCACTCCCTCACACGCAATACACACCCTCATCCTCACTCAACACACACGAAGAAATCAGAAAGCTAAGGGGGAGAACAGGAAGAAGAAGAGAGGAGAGGGAAGGAAGGAGAGAACAACGGCGGCTAACTGGCTAGGGCTTTGCCGTCGTCGTCGTCGAATGCCAGTGAGAGAGAAGAGCTCGAGGAAGAGAAAACGCAATGGAGGAGAGAAGAAAGGGGTGCTCCGTCGTCGCTGAAGCTCCACCGCCGCTATGTCTCGCTGCCGTTATACTCTGTCGCCGTGCTGCCGTCGACTGGAGCTCGCCGCTGAGCTGCTGCACCGTCTCCAAGCCGTTGCGTCACTGCTCATCTCTTCTTCACCGTCGC…
>Peanut_newGene_2043	Peanut_newGene_2043.4
CTCGAGCTCCACAGTTACACTCCAAACGAGTTTCACAAGCAGCTTCAGACTCCATTCACACTCCAAATCTTGCTCCTTAGCGCCACATTCTTCCATCACCGCTGTTCCATAACCACAGTCATCCACTGCATTCTTCCATCATAAACACCTTTGGGACTTCCATCACACTCGTCGTTGTCAATCATCACTCTCGGTAAACCTAATTCTACTTTTATGAGTATAAATTTTAATCCTCCTTCAGTGACTTTTTCTTCTCTTCAAACCCAAACATCGATGGTGACTATATTTTCTTCCAGTTAGTTTAATTGCTGCTTGATTTCATTTTCGATTTGGGATTAAGCTAGGATTTGCTTTTAATTTTGTGATTTATTTGGTTGCTGTGATGAATTTTTTATTTAA…
>Peanut_newGene_2047	Peanut_newGene_2047.1
GCGTCTCTTAATGTCGTCGTTCTCCACACTGTCGATCTCGTTACCTTGTCCTTTTTAGCGACGTCGTTCTCCGTCCTTCTCAATCTCTCCGCGGTTATCACCATCGTGATACTCCGTCATTCTCGGTCTCTCTGCCTCTGTTGTTGCATCTTCTAAAGGAGCCTCAACCTCAGGTATTATGGCACGGGATTGATTTGTTGACAGTATGGAAGAGGCTAAGGGTAATGTTAACCATTTCCCTTTTTTATGTTCATCAGGTCTCACTTTTGGCAACTATAATATCAAAAAGTGAGAACAAATGCCCTTTCAATTTTAATGGTCCAAGTTATGACCATTTAGCATTTCTTTTTCCAACTCTGAAGTCTTAATATTTATCTTTGGCCTTTAGTACCTTACATA…
>Peanut_newGene_2049	Peanut_newGene_2049.1
ATAAAATACAAGCTTCCTCCTCTCTCCATCACACGAGCTACTTCTTCTCTCTGTCGCACGAGCTTCTTTCGTTGTTGCTGCTGTTTGCGTCGCACAATTTCTCTCTGTCATCCCTTGCGTCGCACGAGCTCCCTCCGCCGCTGCACTTATCGTGTTTGCTCCCTTCATCACCATCGTCGCAGAGCTCTCTCCGCCGCTCTCGTCGCGTCTGCTACCTTCATTGTTGTCGTCACAGAGATCTCTCGACCACCGTTCTTGTCGCGTTTGCTCCCTTAGTAAATTTTAGGATGAAGTTGTCTCGTTTCTACCGTATGTTGAGGCCATAAGGTTTGCATTTCATGAGGAGAACATGGTTCGCACTGCAGAAGCTTTAGTTGGTGAGGCTTTAGGTGAAAAGCA…
>Peanut_newGene_2063	Peanut_newGene_2063.1
GAATGAAATAAATTCCACGCAGACAACACGCAAAGCAAAGAAAAGAGAAGAAAGGCGAACCGTCAGAGTTGTTGGATGATTCCACGCTTTAGACACCGACTAATCAGCAAACTTGGATTATATTTTTCTTCTGATTAGCGAACATGAAAAATCTTCCTTTCTTACGCGTAAGGGCCATTGGAACCAACACCATTCACTGAAATCTTATAAATACCTCAACGCCCTCTTTATACAAACCATTTTCGAGTTATTCCAAGCATTCGTCTAAGGTACATAAATTAAAGGTATGGAAGATTCCGTCGAAGTAAGTCTAAATGAAGCAAAAGAAGAGAAGAATATGATTGAATTGGACGTGAAGAATGAATCAAAGGAAGAAGAGAAAGAAAAGGATTTAGAAGA…
>Peanut_newGene_2066	Peanut_newGene_2066.1
ATCACACATAGCCGCACTACATTTTTCCATTCAACAAGCCCGTGTTTCGAAAACCTTCTCTAGCCAACAAAAGGGATAAAAAAGAACAGAAATATTCTAGAATTTTGTTTGAGAGCAATGGAGGCATTGAAGGTTAAGGTTTTCTTGGCTGTGGTTATTGCCTTGGTGATGGCAGCAACAAGTGTTTCAGCTGCTGATGCTCCAGCACCAAGTCCCACATCGGACGCATCAACCTTGCTTCTTCCAACTGCTTTAGCTTCTTTTGTTGCTCTTGCATTTGGGTTACTCTTCTAGAAGCTTCTTGAGTGAGTTCTATCTGTAAAGAGTCGAGGTAGATGATGCGGCAGATGCGGGAGAGAGGAGATAGTGGAAAAGAATATTCTCAAGATAAGTGCTCGA…
>Peanut_newGene_2072	Peanut_newGene_2072.3
TTGCTGTGCCCAGCTCGCTGCCAGTCGCCGAAAGGAGGAGCGTGACCACCACAAGGAATCATCATCATCGTTGCCGAGCAGGGAGAGAGAAAGCGTCGCTGTTCTGCCTTCCATCAAGCCAGTTCCACCGCTGCCGTCACGTCGTGCTGCCACAAGTATGCGCTGTCGCAGCTGTCTCGTCGCGCCATCATCACGAGTCGCACGTCATCGCTGTTAAATCCACGTCGCGTCGCCGTGGCAGGAGCTTCTGCTGCCACGGGGAAGCTCGCGAAGGGAGAGGAGGAGCTCGTGAGAAAGGAGCTCGTCGCTACCGCTACATTCACCGCCGTTAGCGCGCTCCGCCGTCGTTGTTGGGGACACGGTTGCTGAGCCTCTGGCTGCCGAATAACAGCGTTGTCG…
>Peanut_newGene_2074	Peanut_newGene_2074.1
GGAGAAATTAAAACTTCCGTCTCAGGAGGGAAGAAGTAAGAAAACCCAAACTGGGAAGACTCTTTCCATTCTCAAGTCTAATCCGTTTGCTATCCAGAGCAAAGGGGTATCAAAAATGCGAATGGAGAGGAAGGAAGAAGAGAGTCAAAGTTTTGAAGTAACGGTGAATAAGGGGAAAGAAGTAGACTCCTCACCTAGTCCTGCAGCAAAAAATCGGAAGGAAGATGATTATTGGCACTCAATTAAATTGATTAGACAGGCACAATTCATGACTGGAGGTGACAAGCTGGGCTTGGAAGGGCTTCCCTATGTTCAAACATATCTTCCTTCGAAGGAGGATACCAGGGCTGCAAATAAAGTAAATCGCAATATGGGAGACGTGGGTACAACGTCAAATCC…
>Peanut_newGene_2081	Peanut_newGene_2081.1
AAAATAAATTCTCCAGTCATTCTTTCTTAGCTTAAAAATTCTTCTAACAAAAGAATTAGGATGCTTGGCTTGGTTTCTTTTCCCAGTTAAAAATTTCACAACAGCTGCAAAGTCGCATTCAACCACTACTCTTTTTATACCCATTGCCCAAGCCATTTTTAATCCTTCAAAATTGCCCTAGAGCTCAGCTTTAAATATCGAGCAATTGCCAATATTATAGAGGTGAACTCAGCCACCCATCTTTCCTCTTCATTTCTAATACGTCAACCACATCCAGCAATGTCTACACTTTCTTACAACGAGCCATCCATGTTTAGCTTCACCCATCCTGGCGGTGGCAATGTCCAGCATATGTCGATCTCCCTAATCACTCTTCTCTTCTCAATCAGTACCAGAGCT…
>Peanut_newGene_2082	Peanut_newGene_2082.1
ATTTGAAAGAATTTAACATGTATATTTTTATATTTGATTAAGTGTTAAGTCTGTTGTACAAGTAAAAATAATAGGTACGTTTGGACGTAATCTTGTTTTGGTCTTTAAAGTTTAAAATGTTTATTTAAGTTCAAAAAAAGTTTCATTTAGTTTCAATGTAGTCCTACCGTGAGGTCAAAGTTAAATAATTAACGGAATGTCTTATATGACACCAGTACAAAGACAAGGTCGATAATCTGGAGAATAAGTACAAGTTTTCAGAGGCATAAAATCAACTATGGATGTATCAATATATTTATTTATTATTTTTTTACAATTTAAATGAAATATTTTTTATAAAACTAAAGAGAATGATAAATAAATATATGAGAAAAAAATTCAAAACGCTCCTGACAATAT…
>Peanut_newGene_2089	Peanut_newGene_2089.1
TAAACTTAAAGGGAGTGAAGAAAAAGCTAAAGAAATTGAAAAAGAAGTTTAAAAGCTCGGTTGTCTTTGCATGCAGTGAGCTCTGTACTAGTTCACCTTCATCTTTGCTTGGGACAGAACTTTCCGAGGTTCTCGTAAGTTCTGTTCAAAAGTGAAGGAGTTCCGCGCCAGCCATAGTTCCCAAAGGAGGTAAGTAATCTCACTCTTTTTCTTTTTGAAGTCCGCTTGAGATTTGAGTTTCTCCACCATTTGATTCCACTATTGCCATGCTTAAAGGTTTGTGTCTCTTAAGATGTCACTGGCGAATTGGGACTTGTTCCAAACCACCATGGAGTCTGAATAGAAAACCACCGCGTGGAATGCTGTTTCTGACTTTGTCAAGCATCTTAGGCAAAGGGA…
>Peanut_newGene_2092	Peanut_newGene_2092.3
TACTCAATCCTTAAAATTTTCAAATCTAAAATTATAATTAATCAAAACAATTTTGCAACAAAGTTTAGAATTCTTTTTTTTTTTGGACAGAAAAAGCTTGTTTCATTCAATGATTAGTAAAATATCTAGCATAACTAAAGTCTGAACTTAATGTGGGGTTACTTCTATCCACACTTGATAAGGATTAGTAAGGGCCATTTATGCAAGCTCATGTGCTACCATATTTTCTTGTCTCTTTACATGATTAAAATTAATTGCTCTAAATTCTCCTAACAAGGATAATGTATTAGTGATGAGAGAGCCAAAACAAGTTCCATTGACTTTACCTTGTTTCAAAGCGTTCACAACTTTTAGATTATCGCTCTCCAAAATGACATATATGAAGCAACAATCTTTTGC…
>Peanut_newGene_2095	Peanut_newGene_2095.1
CCCATTCCCATCCGCACTTTCTGCTCTAAAACTAAACCACTCTCTCCTCCTTTCTTTTTGTTATTTCCTCTTACTTTTCCTTTGCCACCAAACGCGTCGCAAAAAGCTAATGGCATCTCGGTTGAAGACGACGTGACTTGCCTGAAAGGCTTCAAGGACTCTCTGAGTGACCCTCAACAGAGACTCGCCAAGTGGAATTTGGAAAACAAGACAGCCGGTTCCGTCTGCAACTACGATGGTGTGTCATGCTGGAACCCGCAGGAGAATCGTATTATTGGTCTTGATCTTAGTGGGATGAATCTATCCGGTAAGATTCCGGAGTCCATCAAGTACTGCAGTAAGAATCTTCAGAAGCTCGTACTTGGATCCAACTCGCTCTCAGGGTCGATTCCTCCCAAG…
>Peanut_newGene_2105	Peanut_newGene_2105.1
CGCCTCCATTTGCGCCCGCCTTCACTGCGTCTACCACCAGACCAGCTCCTGTGCCTTAACTGCGTCTCTCGTGCTCGTCGTCGCCTCCTCATCTGGCGTCGCCAGTCTCTGTTTCACGTTGATTCGTCTCCCTCTTCTCTGCCCATATTCTGTCTTCACATCATCAGTCATTAGTCTCGGACAAAAAGGAACACACGAAGGAAGGAAGGAAGACAAGAATGGCGCGGAGATGAGAAAGAAGATGTTGCGGTGGTGATACCCAAAGGCGCTTTGCAAGGTTAAGTGTGAGTGGTTGAAACTATAAAAATGGCATTGTGCCTTCCTTGTCAATTCAGTAATAACAAACTAGTCTGTGACTTAGGTTCAAGCTTTCTTCCGGGGACATCTTCTTTGTCCTGT…
>Peanut_newGene_2106	Peanut_newGene_2106.1
CATTTTTCAACGTTAATTAAAACAATGAACGAATGCGTTCATTCATTATACATATAGTGAGAGACTCGGTAAGGGGTTCGGTCTTCCCTTTCTCCTTTTTCTTGTCAAAGAAGAAGTGAAGAGAAAATAAATAAATAAATAAAAATCTTTTCATCTTCTGAGCAATGGCACCTAGCAAGCGTAAGGCTGAGCAACCACCAGTGGAGGCGACGGGGAGGGTAACTCGGTCGTCGGCGAAACTCGCCGCCGCTGGATTGAAAACCGCACCTGTTGTAGAGGTGCCGGAGAAGAAGAAGGAGACGAAGAAGCCGAAGGGGAAGAAGCAGAAGAAGGAGGAAGTAGTAGCCGAAGTTAATGGTGGTGCTCCTGTTACTGATAAAGGGACTGTTGTAGAACCTT…
>Peanut_newGene_2107	Peanut_newGene_2107.1
AAGCATTTAAATTTTTTTATTAATGGTAAGCTTATCATATGTTTATGTTTAATAAATGTCATTTATTTAAGGGTATAGTTATAATCTTGTTTGGAAAAACTGCATATCCAAGTCTCAATGTCTCATGAACAATTTGTTCCTTTTCTCCATTTTCTTTGACAACCAACCAAAGAAAATCTACTTTTCTCCCCATCCTCTTTTTGCTGTTTTTTCTTCTTTCCTTCCTTTTTTTTTTCTTGAGGACCAAACAATGGGTAAATTTAATCTTTCTTTTCCTTGATCAACTTTAGTTTTTTTTTTTCTATTTTTGGTGAATTTTGGGCATCCGATAAAATTGCTTTTGGGTATTAACTTATTATTATGCCTTATTGAAGGATTTGTGTCTAATTATCAAGACGT…
>Peanut_newGene_2112	Peanut_newGene_2112.2
GATCTATAATCTAATATAATCTCAATTTCTACCATCTCTGTATAAGGAAAATCTTTTCTGTGTTTATTATAAATTGAGAATTATATAGATATTGGGTTTTTTTATTTTTCGGGATTCCAATTCTGGAATGGTGGTGATGGTGTTGGTGTGAGGGAAAGGGGCAAGATGAGAGACGCACATCACATCGTCACAGTTTGTAGAGGGGTCCAAGCGTCTTTCAATAAGCGGTGCAACTTGGACCATTGATTTTTGTTTTTTTATTATAAAGTACAAAAACTCCATATATTAATTCAATTAAATATATATTATAAGTATCGCTTTATATTTAAAGCCGCTGAGTTGGGAAGAAGCCATTGGAGCGAGGTTGTTCACGAGATCTTAAATTGAAGATCAGTGAAA…
>Peanut_newGene_2119	Peanut_newGene_2119.1
AGTCTTTATGGAATGGGGTATGATCCTAATACAGCACTTGACAATTTGGGACCAAATGGAAGATTGAAAACAGAATTATAGTGTGTGGAACAATTAGGCCATGACTCTTCGACACATCGGAATCTTCCGTTCGACTGCACAACTATTTAACTGAAGTTTAAAGGAAGGGAAAAAATAAAGTTCTTTTAGTTGTATAGGATCCTTTTTTTTTAATACCTAACTATTGGCTCTTCGAATTTTTAGAAGAAGATGACTTGTTAGATTTTGTGTTGTTTGGAAGGAAGGAAAAAGAAATGATAGTTACACATATATTGTGTAATTTAAGAACAAGTTGAAGTGGTGTTAGTCTAATGATGACTTGGAGGGCAAGTAATTTGAGGAGCATATATTGGAGTAGTA…
>Peanut_newGene_2126	Peanut_newGene_2126.1
TGGAGGAGCATGTAGGCCTTCCTCTTGCGGCAAAATCACCAACATAAAACATCCTTTCCGGCTCAAGGATGATCCCGCAAGCTGTGGGGATTCCAGGTACGAGTTGTCTTGTGAGAATAACAGGACGCTGTTATATCTTTTCCCCGGTATAAGCTACCATGTGCAGGCAATAAACTACAATAACTTCACAATCCGGCTTGTAGATCCCGCCATTTCAGACTCAGGGGATGACTGCTCCACCCTTCCCCGATATTCTTTGTCCGCTAGAAATTTCAGTGACAGCTATGGCTACATGGATATCCCCAAATACAGTGAACCATATGGAACTATTCAAGAACGAACTCATTATGATGTAGTAAGAATGTTCGAGAACGTGATCTTTTTGAACTGCAGCTATCC…
>Peanut_newGene_2127	Peanut_newGene_2127.5
TACTTTTGGCAACGGCATTCATGTATAATGGAATAGTTACAGTTTCACAGGGAAAAGAACTGGCTATGAACATATGGACAGGGTGCCATTCTTGTTTGTCGGATTGGAACTATGATTTTCTCTCGTCAGGTGTAGCGAATTATGTGGATGATGTGTTAGCTTCATTTAAGATCTTTCCTGGAATTTTGGTTGAGCTTTTCTAATTTGATGATCGGGTTCAGTGGTAGTTGTGTTGTTTGAACATGGCTTTTCTTTCACGCAGCTGTTCTGTTGATTGTTGATTCGACATTATCTGGATTATGAATGCTCGCTTTTTTGTTGGTGTTTGGAGGATGAATTCTACTTTTGCCCAGATCTGAAGAAACTAAGAACTCCCTGAATCCTTGCTTTTCCTGAAAA…
>Peanut_newGene_2132	Peanut_newGene_2132.1
GAGAACAAAGATTCCCACTCTACTCTCTTCTTTTCTCAGCTCAAAAAGCCAAAACCATTAAAATAATAACCAATAAATAATAAATAAAATCCTTTTGTTTTTTTTAATTATTATTTTCCGTCAATTTTAATGTGAAAAACACGAAGAAGAAGAAGGTTCCTCTTCAATGGCGGGTCGAAGAGACGCGTTGCTGAGCAAAGACAAAGCCCACTCCTCCCTCTTCTTCAGATCTCCGATCGCCGCCGCCGTCCTCGTCGGCGTTATCGTCGGCTGCGTCTTCGCATTCCTCTTTCCGCATGGCCTCTTCTTCGGTCCTCATCATCGCAAACTCAAAACTCGAATTTCACATCCTCAGATGGTTTCGTCTGTGGCGTGTGTATTGCCGGAACAAGTTAATGT…
>Peanut_newGene_2136	Peanut_newGene_2136.1
CGAGAACTGCGAAGAGGAGGAAAGCACAGCACAGAATCAAGTGAAGAAGAAGAAAAATGTTTGGGACGGCAGTGAGATTCTTAGCTAAGAAATCGAAGCCGAAGATGGGACCTATTGCGATGAAGACACCGCCGGAGCAGAGGAACACCATCACCGCCGTCCTCTACGATATCGTCAAGGAGAATGGTCCAATCACTGTATCCAACACCTGGGAGCGTGTCAAGGAAGTAGGGTTGAAAGATTTAACGAGCAAGAATCACATGAAGATAATGCTGAGATGGATGAGGGAGAGGCAGAAGCTTCGTCTTGTTTGTAACCATGTTGGTGCACACAAGCAGTTCCTATACACTACTTGGTTTACAGATCCTGCTGCTGCTACTAAGCCAACACCATCAACTC…
>Peanut_newGene_2138	Peanut_newGene_2138.8
TTTTATCTCTTCCTCCTCTTCTTCGGTTCTTCTACTTCTTCATCTTCAGTTTCTCTTCTTTTTTCTCCTCCGTTCACTGATTCTATTTTTGTATAATCTTCTTCTTCTTATTCTTCAGTAGTTCTTATTCATCTTCTTCTTCTAATTCTTATTGTTCCTAATTTAAGTCAGAGGTGGAGATTATAGAGTTAGTGTATGCACCAAGGCAGAGAATATCACTGTACCTGATGGCTCCAACCTTTAGGGGAGTCATCGCGGAGGAGGCAACGTCATCGCTGGTGTTAGGGTTGCGGCGGTGGATGAGATGGCGACTGCTACGGTGGTGGACCATGCTATGGCGGTGGTGGTCGCAGTAGGTGCGGTGGAGTTCGTGGTGATCTTTCAATGCTGTAGTGATGG…
>Peanut_newGene_2147	Peanut_newGene_2147.2
CGTCATCATCGTCGTCTTCTCCCTCTTCTTCTTCTTTCTGTTGTCCCCAACACATTGCATTGCATTAAATGCTCCTTTCTGTGTGTAGGGTTTTCAGAGTGTCCTTCTTCTTTTCTCACATAGCATTTGAATTGATTCATCTTCCCTAAACAACTGCAGCTACATACATACAACAATCCCAATTCATCGGCGCTTCTTCAAATCCAAATTCTCACTCACAAAGCTTTTGAATTGAATTGGATGGAAAGCTTATTTGTCAGGTTCATGCTATGGATTTGTCGGATGCTGTAATTGTCAAATCCAGTAGGTTGAAGTCTGTTGTATGGAATGATTTTGATAGAATTAAGAAAGGAGACACCTGTGTGGCAGTTTGTAGGCATTGTAAAAGGAAATTGAGTG…
>Peanut_newGene_2155	Peanut_newGene_2155.1
GAACACATAATACGACTTAATTTAAATTCTAGTACTGAAAAATGGGTTCAAGAGAAGCAATACTCATGCTTGGCCTCTTGGCCATTGTTCTTATCTCTTCAGAAGTGGCTGCTAGAGACTTACCTGAGGCTTCACTTAACAAGGATGAAGCTGGTACAGAGGCAAATGAAGTGGGTGAGGCCAAGTATGGATACGGTGGTGGTAACTATGGCCATGGTGGTGGTAACTATGGCCACGGCGGTGGAAGCTATGGCCATGGTGGCGGAGGATATGGCCACGGTGGCGGAGGATACGGCCACGGTGGCGGAGGATACGGTCACGGTGGAGGAGGACACGGAGGAGGAGGATATTGCCGTTACGGTTGCTGCGGCAGCGGATACGGTGGGCGGTGCAAGTGCT…
>Peanut_newGene_2156	Peanut_newGene_2156.1
ATTATGTGACATCATTTGTTACTGGTTTGTGTTACCTCAAAAGATGACTTCCAAAATTATTTTACTCGTGCTAAGCCTCTTTGTCCTAGTTGTTCTTATTTCTGCCAGGGACATTCAAGAATCTTCTTCTAATTCAAAAGCAGGTGTTATGAATGGACAAACCAATAGTGGTTTAGATCAATATGGCGGGTGGGGATGGGGAGGATGGGAATGGNNNNNNNNNNNNNNNNNNNNNNNNNNNGGGAATGGAGATGGGAATGGGGAGGAGAAGCACCAAGTGGTGGCTCGGGTGGGGCTGCTCCTCCTCCTTTGGGTGGCGTGCCAGGTGGTCCCCTAGGAGGTGGCACCATTGGAGAAGCACCAAGTGGTGGCTACGGTGGTGGTCCTCCTTTGAACCGC…
>Peanut_newGene_2158	Peanut_newGene_2158.1
CAGCGCCGCCGAACCTTTCGTCCCAGCACCTCCTCGCAGACAGCACCAGCCAACACCATCGTCGCAGAGCCAGCACCACCCGCGTCACCACCCACAGCATCGTTTCTGGCCTCGCGGAGACAGCACCACCCAGCCACCCACAGCATCGTTTCTGGCCTCGCGGAGACACGGATAGCAGCCGCCATCGAGTCAAGTCAGATAAGGAGCCTCCAATTTAGGAATTGCTGGTTATTGAATTATTGTTCAGTGTATTGAGATCAGCG
>Peanut_newGene_2164	Peanut_newGene_2164.8
GCAGTTCACACACTGGGTTGTCCATCAGTTTTTATCCAGTGAGTGACGCGGGAAATAAATTTGAATTGAGAAATCAAATTTTAAAAGTTGATTTATTTCTCTCCCCTAATTCCTTTCTCCTTTACCCTGATGACCAGAGTTATCTACCCTTTTTTTCTCAATCTCTCCTCTCTTACACCAAGGTCTCCTCCCACGTTCCCATCGAAACAGAGAAGAAGAGAACATGACAGTGAAGAGAAAAAGCACGAGGAAGAAGAAGAGGGAGGTGACGACGGCGGCGGCGGTGAGAGGCGGCAACCTTGCCACTGAATCAAACGAAAGAGAGTGAAAGCAAACAGATCGGTGACAGAGGAAGAGGAAGGAGGCGACGGCGGTGATAGAGGCCACCGCCGCTGTTGG…
>Peanut_newGene_2166	Peanut_newGene_2166.1
TATTTTCAGTAGGCCAGTGGTTTCACTTGATAAGTTCTGTTGGTGATTTCATCCTTTTATCTAAGCATTATGACTTCTGTATGTGTATGTGTTTCCTTTTCTGATGAGAGATTTTTCATGTTGTCTGTTGTTGGAGAATGAATTTGAATAAGTCGTTGTATATTGTTTCTTGCATCTAGGTTGAGCACCACATTAGATGAAGTTATAGTGTATCCCATTCCAGCAGCACTTTACCTTGTCAAAAATTTGCTTCAGATATTAAAAAACTTGAATATTATCAGTACAGGTGTTCTCTACCGAATTATACTCAAGAAGAGGTAGCTTTTGTTCTTTATTTTCAATATAAAAAAAATTGTTGTCAATTCTCATTTCATTATCATAATCTTTTGTTAAGGATCG…
>Peanut_newGene_2168	Peanut_newGene_2168.1
TTGGAATTGAAGAGAGGCAAATGCTGAGTCATAGGCATGAGGCACTATCTGTGTTGCAGCTGAAACTTCTCCTTCTCCTTCTTCTGCTGCTTCTCCATCACCAACAACTCAAAGTTCACACCTTCCTCCTCCTTCACCACCACCAACAACGAGTGGTGCTGCTATTCCTTCTTCAACGAAAAAGAGGCCTCTCGAATCTGATTCTTTTTCCAACTACTACAAGATTCGCGCACTTATTCCAGACCTTCGCCCCCATTTCATCCAGGTTCTACGAACTCCCGACTACAAAAGTAGCAAAGAATCCCGAGAAATTCGAGAACAATTGAAGATTGTTGTGAAGTTATATGACGATATGAAAGCAGAAGCAGTTTCGTTGGCAAAGTATAAGCAAGATGGCCA…
>Peanut_newGene_2169	Peanut_newGene_2169.4
CGGAGTCACTGTCATGGAGAGAGGCAGAGAGCAGATCAGTAGAGCTTCTTCTTCTTCGACGACTGAGAAAACCGCTGTCCTCCGTCGGAGAGCCGAGCTACTTCTTCTTCTTCTCCTCCTCCGCCGAGCCCGCCGCCGCGCCATCCTGTTCATGTAAGTTCCTCTCAGTCTCTCTGATTATTATACTTATTTTTGCAGTTGTTGTATCTACTATTTTCATAATGAAATTCTGAATTTGCGTTTTTTAATAACAATCATCAATATTACTGAAACCTAATTAGCATAATCAATTCATCACATTTCATCAATTGCTTTGTCTCTCTATGCCGTTGTTGCTGCTGCCTTCAATTGACCGTGCTCAATCAAAATCAGTTACTCTCTCTCTTTCGTTCTTCAATT…
>Peanut_newGene_2177	Peanut_newGene_2177.1
GCAGCCACTTCCCGCCGGTGCCAGCTCTGTTCCACACCACCACGTCAGCCACTGTCTTCCCAGCCACTGTCCCCAGCCACTTCCACACCCTCGCCAGCTCTGCCCTGTTCCAGCCTTCCAGGATCCAGCTTCTAGCCTAGCTGTCATTGGAGCCATTCACACAACCACTTTGGCCAAGCTCTCTGCTAAAAGGCAAGAAGTTCTTTCTCCAGCAGGCAACATTGTTGAACAGGTCAATAATACACCCAAGTATTAATCTTGGGAGTTCTTTTAACTTTTTTCATCTGGGGTGGTGTTGTGATTGTTTGATTGAATCATTGAATAACTGTTGCATGTCTCTGTCTCCTGATGAGTTTGATTGAGTAGCTCTTTGATTTTGTGACATGATGAACTCTGAAA…
>Peanut_newGene_2181	Peanut_newGene_2181.3
AAATTTATCCCAAATGCCAAACAAAAAAATCGTATTTCAAAAAATTAAAATTCGATTAATTTTTTTTGAAAAATAAAGTTTTTTTTAATCTATAATAAAAAATATTTTTTTATTGTTAATTTCTTTTTTGTTAATGCTTTCTCACTTCCTATCCCCTACACACACTCTCTCTCTCTCTCACTGACCCAGGAAAAACCGATCGAACCCTAAATTCGTTCTCCCGTCACAAAATCAGCGGAACGCAGTGTATGGTTTTTGTTCTCCCTCGCAAGCTAAGGCTATGGCTTCCGATACTGCCTTTTCTCGCTCGAGTTCCGCCGCGGATTCCTACATTGGTTGCTTGATCAGCTTGACCTCCAAGAGCGAGATCAGATACGAAGGTGTTCTCTACACTATCAA…
>Peanut_newGene_2185	Peanut_newGene_2185.6
GTTCAAGATCATGACTACTCATCTACTCGGATATATATATGTGTGTGAACCAAACTAATAACAGTTGCATGTCGTTGGGCTGTGGAATATTCTATCCACACGTTGGGAATATGCATGTACACTACAAAAAAAAAGTTTTATGGTCACATTTCTTTTGTCACGCTTTAAAAACGTAGCCAAAAGTGGTCAATAGTCACGTTTTTATGAGGGTGACGATTGAATGGAGACTTGATCACGTTTTTTCTTGTTATGCTTCAAAAACGTGGCAAAAGAGGTCAATGGCCACGCTTTTATGAGGGTGGCAATTGATTTGAGATTGACCATACTTTTTTTGCCACGCTTAAAAAGCGTAGCCATAGAGAGAAACAAACACGCTTTTAAAGTGTGGCGACAAGGTTT…
>Peanut_newGene_2189	Peanut_newGene_2189.1
CCAAATCCGTGTTATGTCAAACTTCGTCACTACTTGTCTCTATCAAACCTAACATATATAACTTATGTTTTTTCGTAAGGTCCTTTACCATGCTCAATTTTCCATCACCTCTCAACCCTCTAACATTCCAACAACTAAAGATCATGATAAATTTTTTTACATATCTTTTTGAATTTTTTTGTCTGCATCATTTTGCTTTCTCTTTCTATTTATCCAATATCCTATTTTGAGCAATTTCTTTATTTTGTGCTTGGAGGTTAGCCATGATGTCATCTTTTTCACTGTACAATATTGCACCATATTCCACTGTCAGTTTCCATGTTTTCTATTTTTAATCATCTGCTCCTCCAATACCAGCCTTTGATTACCTCTGGTTCCCAAGCTCATGACATCTGTGTC…
>Peanut_newGene_2208	Peanut_newGene_2208.1
CTCTCCCCCCTCTACTTTTATTTTCCGGTTCGTGAAGTAGTATTTTTCAACTTTGCTCCAAGTGTTTGGCTACATGGGAACGCTGAGAAAATGAAAGATGAGCTGGAATCAGCAGTGCCAAAGCTTTTCTTTTTTTGTTCTTATGTTAGTTATGCTGCTGCGTGGGGACTAAAAAGAGTCTTTGTGCTTCTTTTGAATGTGCTTGTTGCTTATATGTAACGAACCTTTTGGGGTCTTTGGAGCAGAGTAAAGCGATGGTTCATGGGTTTTTATCTTCGATTTTTTCCCCAGAAAGCGAAAAATCGCAGCTGAACTGTAAGGAGAGGATAGTTAAAAGTAACTAGTCATGGATAAATCTGAGCAGACTCAGCAGCAGCAGCAACAACAACAACAGCATGT…
>Peanut_newGene_2218	Peanut_newGene_2218.1
ATGAAGACTTGTGTGTTATTGAAAGAGTTGCAGAGAGAATAACAAAAAGCGAACCGCAGACATTGTTTCCATATTTGGTGTTGGCTCAGGCTTATCAGATGAGGGGCAAATGGGAGAGCTCAATTCGAGCCAGGAAGGCTGTGGAACAAAGAGGTGCTAAAGAGTTCATTGGATACAGTTGTGTAGCGATAAAAAATCAGGTATACTCGTTCGCATCAAATCAATTACAGCATTATGGAGGCAGGGATCTTTATTTGATTTTGAATTTACTGCTCTGGGAGATTGAGAATGAAGGGTGTGCCTAGAAAATCCGTAAGACAAAAAGGAAATGTAAACAAACGGATGAAAGTTTGCTGCAGCCCTTTCGAAAAATATTGAACTGAACACCTAACTCATACT…
>Peanut_newGene_2223	Peanut_newGene_2223.3
CCCTAATACACCCACACACTCACCCACTCCATCTAACCTAGCACCGCACCCCACCCCGTTCTTCCCCAAAACACACATACACAACTACAGCTCATCACACACGCACACACAAGCTTACACACGCAGAGAAAGAAACCTTGACGGAGAAGATGCTACCCTACTGACAGCTTTGTCGCGCCCAGCTGTCGCCTTGCTTGTCGCCACCCTCGATTGCCGAGAGAGAGGGATTCCGACGTGGTCTAGGTATGGAGGCAGAGTGAGAACGAAGCGCGAGCTGAGGAGCTGTCTTCGCGCACCGTCGCTGTTCGTGGAGCTTGCCACTGTCACCGTTCAAGCTGTTGCTGCCGCCATCACACGCGATGCCGCCGAAGCTCCCCTCACCGCCGTCGACGTCGATCT…
>Peanut_newGene_2224	Peanut_newGene_2224.1
CAAAGCACTACTACATGGTATCTGGAGTTGTTGGAAGGATTCTCACCCTGTTGGATCCAGCTTGAGTTAATATTCTGTGTTCTGGAAGCATCTAGATAGATCTACATTTGGTAATAACAGTAGCATCACAAGAAGTACCACTTTGTCATTCAAGTTCAAACTACCTAGATCTTCATCCATGGATGGTCTGAGTTGGGATCCTTCTTCACAACTTGCTGTTAATAACATACCAATGTTGGAAGGAGAAGAAGACTACTCCATCTTTGTTAATAATCACATGCAAGAGATGCACAAGTCTCATCATCGTAATGGATATCCAAATTCTGAAAAAGTGATGATGATGATGAGCAACATGGTTCAGTACCCATCATCAGCAACACCAGAAGCTGAGATTGTGAG…
>Peanut_newGene_2227	Peanut_newGene_2227.1
GTGGAATTGGTGGATATGTAATATTGTAATGCTTTCAATGCCGTCGAACAGCACCGGCGGTATAGGATGCATCCAAAGATATGCAAATCCTCTTCACTGCATTTTGATGACAATAAAGCACAAAATAGGAGCCAATAACGTATATTTGATGGATTGCTGCTGGTTGTTGACTTGTTTATTTCATTGTTGCTGCCTTGCTGGTTGTTCTGTTGAATTACTGAATTGCTTTTGAGTTTTGAATTGATTTAGTATGATTTATCAAGTGTTGGAGGTTTTGAATTACTGAATTATTGTTGAATTACTTTATTGTTGGTATTGTTGATGCTTGGTTAATGATTTTGTAAATTGCTTGATTTTGTAAATTGTTTGTAAATTGATTTTGTTGTTTAATGTATTTCT…
>Peanut_newGene_2229	Peanut_newGene_2229.1
AAGCAAAGCAAATCACTCATCTCACTTGGATATTTAGAAAAACATGTTTCATATGAAACTTGGAATTTCATTAATAAAATGCTTCATAAAATGTCTTACTAAATAGCTTAAATAGTCTCCTAACTAACCAACCTAAGCAAATACAGGAATAAAGAAGGAAAAAACCCCTGAAACTCTGTTGTTCTCTAGTTTTCTTGAATATCTTTGGCCCATCCGCCCAGGAGGGGGCATATAAATGGTCCCATTGAAAGAAAAGTGATGTTGATAAAATAATAGTCCTGGGAAGTGAACAAATTATAATATGCCACGTAGTAGTTAATCACACTGCTCAGTTATAAGTTTATTTCATAATCAAAATTTTCTTCTACCTTTCTTCAAATTCTGGCTAATCCTACCATC…
>Peanut_newGene_2230	Peanut_newGene_2230.2
CAAAAATCTCCAACCCTAATATTTTCTTCTCTTCAGCCGCCATACCTCCCTCCTTTCTTCCAAAGAATACACATACACACACCCAACAACAGAGAGAGAGAGAACCAGAGCCGTGGGAGAAGGGAGAAATGGAGGAAGACCGTGTTGGCGCCGTGAGTCTTGCCACCGCGGTCGACGCCGCTGCAGTGAGGAGGCGCTGCCATGGGCTGCGTAGCCATTGCCGTCGAGCTACAGAGAGAGTGCTTGCGAGAAAGAGCTCTCGCCGTTCAATGCAAAGCCGTCGCCGCCATTCGTTGAAGTTACCGTCTAACTGTTGTAGAAAAGACAGAGGATCTGCGCGAGGGAGGAAGGCCGAGAGGGAGACGACGTGATCATGGAGCTCGTCCCTNNNNNNNNNNN…
>Peanut_newGene_2234	Peanut_newGene_2234.1
CAAACTTCTTACCATATTTTATCACTATCACCGTAGCCTCCACATCCCTCACTTCATTGTCATCACCATTCACTTATCTCTCAACCTTCCTTCTTTTACTTTCCGTTCTATCTTTTTTTTCTTTGTTAATTGGGGACATACAAATCCTCTAAGTTTGGTGTTAGTTTTGATATAGTGAGATACATCAAATATCATGGCCCCTAAGAAAGCCTCTGCTTTAAATAAAAGAAAGGGAAAGGAACCAATGGCAGCTTCATATGATTCCACAAGGTTCCTCTCCAGCTTTCATGAAAATCTCTTTTATATTGCTATGTATGGCAAGAAGATTATTTCTGAAGGACCTTTGCATCTAAGAAGGGGGAGTACCCTGAAATCATGGATCAAATTGGGATGAGAAGG…
>Peanut_newGene_2240	Peanut_newGene_2240.2
CGCATCGCCATCTGTTCATCGCTGCTCACATTTGAAGCTTCTTATTTTTGGTCTTTTCGCTTCCAATTTTCTCGTCGCCTTCTGCTCTCGGTAGCTTCTTGGCTCCTGACTGGGTGCTGAGCTGCTCTGCACCGCCGTGGTGCATCATAGGTGTTGGAGTTGGCTGGGAATTCTTTCAGTTCAATTGAGTTAGCGCTAAGTTTTTCGCCATGTTTCCAATTACGTTCACAAAAGGATTCATGTTTCTTGAGTCACAAGGTGCCTTTGGAGTATATTAATTCACCAAGAATGGTGTTTGCAGCTACAATGGATACGTTACTACTACTATCATATATGCTTGAAAGTGAATGCATTAGTAGGGTCTCTAAATATAACTCTTTAAGAGGGAAAAGAAAATTA…
>Peanut_newGene_2241	Peanut_newGene_2241.1
CTCCCACTCTCGAAGCTGTGTTAAACCACCTCTCGCTCCTCCTCTTCAATCTCTCGCTCTGCCTCTTCGATCTCACGGTTCGTGAATCGAAACCATAATCCGGTGTTTTCACTCTCACTCCAGCTCTCGCCTCTGGTTCATCCTCTCGCCCCGTCGTCTTCTCGCCTGCACCACCGTCTTCTCGCCTGCACCACCGTCTTCTCGCCGCGTCTGCTCGTCCCACGGCCTGGTATCCATCATATTGTGGATCAAATATATGGCCAAGCAGTGCACTACCAGAACTCGACGTGGGTTTTTTTAATGGGTGTGTGGCTCCCTTTAAATATACAGCAGAGGTATCTCCTTTGGATAATTTCTTAATTTCTAAATAGTATTAAGTGGTGCTCATTTTATTTTATT…
>Peanut_newGene_2246	Peanut_newGene_2246.1
CCAACAACAACTATGCTCACTCCCTAGATTAGCACTGCGCACAAGACCGGAAGATTACAAACTGCTAATGCTCTGGGAGAGGGGTATTGCTGCTCCGTCGATCAATGTGCATGATGGAGAAGATGGCACGACTGTCAGAGAGGAGGACGCTTGGACGCAGGAGGTGTGACGCTATGGGTAGACACTAGGGGCATACTTCCATTGACAACCTAGAACCACAACTGAGATTTACTGGCTCTTGGCTGCAAGTTCCTCCCATGGTTGTGGAATGTTAGGACTCGAGACAAAACTTTCTTTCTAACGCTGGTTGTGGTCTTTGAATCAATCGATGGGTTGTACTAAAAAAGATTGGATAGGACTAAAATGGGGGATCTCCGGTCTCTTTTTTTTTATGATGTC…
>Peanut_newGene_2265	Peanut_newGene_2265.3
TTATGATATCGGGTTGCAATTGAATCTCTCTCCCAAGTCCCAATCCGCAAACCCTAATTTTACCCGGATTATCCGATCGGACTCTACTACAATCCGAACACTGCAACCTCCTCCTTCCCACCCCCGCATTTTCCTGCAGCATTACCTGCCTATTCGATGGAAATATCAAATGATTCAGGCATAAAGAAACCGAAAAGGCTGACATCTGTTGTGTGGAATCACTTTGAAAGGGTTAGGAAGGCTGATGTCTGCTATGCTGTTTGTGTGCATTGTAACAAGAAACTCAGTGGATCAAGTAACAGTGGAACAACTCATTTGAGGAACCACTTGATTCGATGTCTGAAAAGGTCCAACTTCGATGTCTCTCAGCTACTTGCAGCAAAGAGAAGGAAAAAAGAT…
>Peanut_newGene_2267	Peanut_newGene_2267.3
CAGAGCTTTGTTTTGTATTTGTCAAAATGACGTTGTTTTGTATTTTCAAAAAAAAAAAAAAAGAGAAACATTGGAATACCCATTACCTAATATCTCCATCCCCGTTTCCCCAAGTCCCCAACCTTAGGTAACCCTCACCTCACCTTATCTCACTGCGACACCACCGGTCTGTGTCGTCTTCTTCGTCTTACTTAACCTCACCTCACCTCACCGCGACACCATAGTCTTAACTCTCAAGTCTCCGACGACGTTCCTGCACCATGGTTCCTTCGTCTTTTTTGTCGTTTCTCCTTGCTCGGCTTCGTCGTCGCCGTCATCACGTCCTCTCCATTGTCTGCTCTCTCGGACAGTTGATCCCAAAACCTGTTTTGAGAAGCCATGAACAGTGTTGATGATCCA…
>Peanut_newGene_2274	Peanut_newGene_2274.1
TCTTCTGCCAACACTCTCTCATCTACTGAGGAAAATACTAAGGTTTTTTGTGTTGGTGACTTAACTAAGAAAGATGGAAGGAAAGTATGGATTAGTTAGGGAACATAGTGGGATATGGAAATCATTGAGAGATGGTGACTTTGATGAAGAAGATGTTTGGTGTGTCCTTAACAAGGACACACATAACTCTGATGCCCTTAAAATTAAGGAGTCTTCTCCTATTCCTGTCCCTAGATCAAGAATGATTCCAAGGCCTAATAGCACAAATAACATTAATAATAATAATAATAATAATAATTCCTCTAGTGAAGCAAAATTTCATCAATTTCTTCAGCAATCAGCACCGGTCAACATTCCTGATTGGTCAAAGATGTATAATTCAGGTGATTTTGTTGAAGA…
>Peanut_newGene_2275	Peanut_newGene_2275.2
AAAACCTAACCCTCGAACCCTTAACCAAGCCACCGAAACCCCTTCCCCAAACCCAGCAGCATACACGAACCGGGAAACAGAGAGAATGAGACCGAGAGAGGGAGGCGCATCGCCGGTAGGGATTGAGCTGCCGTCGCGTCGTCGTTGAACTGGAGGGAAGAGCTGCCGCCGCCACGCCTCACCGTCGAAGCTCCACGTTGTTGTTACCGCCGTTCGCGAAGAGAGAGGAAGCCCGCGAAGTCGCTGCTGAGCCACCGCCGCTGTATCCTACCTGCGCCACCGTTCAAGCCCATCGCCGTCCATAGAGTCGCGAGGAGCGCCGCCGTCATCGTCGTGATGTGTGGGCTTATCGCAGAGAGAAGAGACAGAACGCGACGGGAGAGGGAGGGGGACCGTTCC…
>Peanut_newGene_2282	Peanut_newGene_2282.1
CCTAATTCTAAGGGTCTCCATTAATTAACATTGTGACACTTATAATATAATTTTTTTGACCGTCAGTAATGAAATTTATCTCTCTTCACTCTTCCTTTTACTCTGCTGTTTGAGATGAAATGAGAAGAGACGAGAAACAGGAAAAGTAACACCATTACCTTCACCGTCGCAGATCGCATTCACCGTTCACCGTCACAGTGTGTTCGCCGTTCACCGTCGCTGCGTCGCAGTCGCGTTCGCTGTTCACCGTTGCGCTTCGCGCTCGCCTTTCACTGTTCGTCGTCCCCCGCGTCGTCCTTTCTCTTCTCCTATTTTATGTGTGCGAACCTTACCCTAATTCTCCATTTAGCGATTTTTTTCTTCTTTTCCAACCCCACTGAACACTGATATTTCAGTTAT…
>Peanut_newGene_2287	Peanut_newGene_2287.1
TGTGACGATGTCTCTTATTTCATTTAATCAATTCTAGAATATGTAGATAGATTATGCGAAATTTCTAATTACTTTGTGGATTATATTTGGTTTGACATTCAATTGAATTGATTATTCCATATTTGCATAGTAGGTTAGGGTTTATGAGGAGATTGTTGTTGATTGTTTTGTTGTTGTTATTGTTGGTGGTGGTGATAGTGTATATAAAGAGAATAGAAGAGAACAGAGATGGGATTCATAATGGAATTTGCGAGGCACTTGGTACTGAAGATGATGGAGGATCCAGAGGAAAGGGATAAGAAGTTCAGGGAGCATGTATATGCCGTGAAAGACAGGTGCGCCAAGACCAAGGAGATGTGGAGTCTCCCAATGAGGCCCTATGGCTTTTGGACCTTCGAG…
>Peanut_newGene_2292	Peanut_newGene_2292.1
GAAGATCTTTGTGATGACATGTATTTCGACCCAAATGGCACAGGGGACAACGCATAGCACAACAGGTGTCAATTTTATTGAACGAGAAAAAGAGGGCACGAGTGCAAGGACATCACAGGATTCACCGCAGGATGTTACAGGGAAATAATGTAATCGTGATTGCCGTTATCAAGAAAACCTATTGTTGCAGTTCGATTATTGTTTGAGCATGGCCTTTGATTCATCTGTACACCAAGTTGAACCTCACGTGTTTTATGCTTAGTTGTAGTGGTGATTACTTTGTGTTGTGTTGTATTCAATTCCTTATACTTTGAATGCATTACGAATAGGTCTGCCTAGGATGATGAACTTAGTAAATTGTTTATGGTTTTTTTGTAGGATGGTGAAAGTATATTTTGG…
>Peanut_newGene_2301	Peanut_newGene_2301.2
CAAAATCACAAACCCTTCCATTTTTCCCCAATGTCGCTTCTTTCCTTCTTCACATTCTTCATCTTTTTCTTCTTCACACCCACCCTTGCTTCCACCGAGTTTGACTTTGGAACTTTAACGCTCAGTTCTCTCAAGCTCCTCGGCGACGCTCACTTGAACAACGGAACTGTCAGCCTCACGCGCGACCTTCCCGTCCCCAACTCCGGCTCCGGCAGAGCCTTATATTCTCGTCCGGTCAGATTCCGCCAACCGGGAAACCATTCTCCGGCCAGCTTCCGAACCTTCTTCTCATTTTCTGTAACCAATCTCAACCCTTCATCAATTGGCGGCGGCCTCGCATTTGTCCTCTCGCCGGACGACGACTCCCTCGGCGACGCCGGCGGAAGTCTCGGCCTCGCC…
>Peanut_newGene_2307	Peanut_newGene_2307.1
NNTTGAGAAGCCGTTGCCGCCAGATCCGCCGCTGCCGGAGCTTCTGTCCGGGTCCTGCCACTGGAGAACACCTCTGTCGCCACCGAGATCTGCCGCCGTCGCCGTTGTCGGAGTTCTGGTCGTCGCTGTCGTTCGAGGTGGCTGCCGGAGCTGCCGCCAAACCGGTTCAGCGATTGCCGCTGTTTCATTTTCTTAGTTTGGGTTGTGTTTTGAGCGTCATATGTCGCTCTTAAGTTGCTGTGAGTGCTGCGGAAGTGATCAGGGACTGAGTTTGCGGTTGCTGTTGGTTTCGGGTTAAGAGAAATGGTTTCGTTGACGCATTTTAAGCTATGGTTTCGATGAGTCGAGGTAGGGTTTTTCTTAAAATCTAATTTATATTACAGAGTTGTGATAAATAGA…
>Peanut_newGene_2313	Peanut_newGene_2313.2
ATGCAAGTTCTTCTACCTTTAGGCACAATGAGACTCTCTCTGTTTCTTCAATGCTTGCTTTGTCTCTGCCTAGCGCTGCTTCTGATTCATCCCTCCGTTTTAGGGCGTATGGATCACGGCCGAGGCCGTTACAGTGATAGCCCAATAAAGCCACCGCCAAGACCACCCAAGGCTCCTAGCCACCACCCATGAATCATAAAAAAAGATTGAGTTGTGTTGTATGTATAAAACTCACTATATTTTATAGATCAAATTTATTAATTTCTGTTATACTATTGAACTAGTTAAACACATAAATTAACTGAATCTCATACCTCATACCTCATCCAGTAAAAGAACATGAATCAATTTGATATTAAAAAAAAAATATGAGTATGATTATATGTTAATAGTGTAGAG…
>Peanut_newGene_2320	Peanut_newGene_2320.1
CTGGTGTAGTTGCTCCTGTACAACAAAAAAGGATGGAAGCCATTATGAAGGACACTAAGCACTAGACTGCTCAATGGACTGGCGACGATGCTAGACAGGTTTTTGAGGTGCAAATGCACATCAAGAAGCTGGGGGTGCACTTAGGTAATAACACATGTACATGTAACATGTGGCAACTTACAGGTATAACACTCCAACTTATGCATTTTTAGTTATTATTCTTACAAACTGTATATCTGATTGTTGTTTACAATCACTTATAGGAATTCCATGTGTGCATGCCATGGCTGCTATTGCTAAGAGGGGAGACAGACCAGACACATATGTGCACAAGTGGCTGAAGATGGATGCCTTCAGAGCAACATATGGTCATTCCATTAGCCCCGTCAACAGTGAAGA…
>Peanut_newGene_2330	Peanut_newGene_2330.1
CCGTAATCTTCAAAATCCAATCTTCCAACTTAAACAATCTGTTGTTCTAAATTGGTGTTCGAATCGGCATTGATAAAGAAAATGGGCCTCTCAAGTCTGCCATCGCCGTCCGAAGGAGTGCTATGTGCACTTCTTGTTAACACTGTGCTCTCAGTCTCCATATTTAAAGGCATTGTTAGGACAATCCTTCACATTGTTGGCATCCACCTTTCATCATCCTCTTCGCCGAACGCCACCTCCCAGAGCCATCAACCATCCGAGTCATTCGAGTTCCTCCTTAGCCCCTCAGAAACATTCATCGAAGAGTTTAGGAGCCGGACGCCTACAATCCGCTTC
>Peanut_newGene_2333	Peanut_newGene_2333.1
GTCGCCGTTGAAGGCAGAGAGTCATGATGGAGCTCCGTTTTTGCTTCTCTGGTCCGCCGAGAAAGGAGCTCATGGGTGGAGGAAGGCCAGTTGAGGGAGAAAACGCTGTTGAGTGGGATAAACGCCTCTGCTGTGCTTCTTGGTCACTGGTGATAGAGCCGCGTTGCCGTCACCCCTAGGCAGCCGTTCCTGCTGCCGTCGTTTCCTCGTTCTGTTATTATTGTCTAATTGAGATTGGAGAGGAGAGG
>Peanut_newGene_2335	Peanut_newGene_2335.2
CCCATTCTGTCCCGTCCGGCTCTTTCTCACATATGGACCTAGCAACCGCAACAGCAACAGCGGCCGTAGCAGTAGTAGCAGCTTCCACCAGCGTGATCTAACAAAGAGGATATTTACTAACTGGAATAGAGGATATCAGTGTTTCATACCAGGCTGATTTGCCTTTCTGAAAGATAGCAATAGCGAAAGATAAGAATGAAGCCGCTTTTAAGAATAAGGCATTATTTACCTAAAGTTTTATGTAGGCAACATCTTCGTTTATATGTAGTAGGGCTTAATGCAAGTAACTCAAATATGTCATTAAGAAATTTTGGTCAAGCTGCAAGGAAACAGGAGGAAGAGGACGTTGAGGAGGTGGAGATTGACCAACGAAATCTCCCTGCTGATTTTGATCCCACA…
>Peanut_newGene_2338	Peanut_newGene_2338.1
ACCCTAACCATTCAATCCTCTCACCAACAACTTCATCATTCTCCACCCATTTCCATTTTCTCTCACTCTCTAACATACACTACTGCAAACACAGTATTACACTTCACTCACAGTCACTGTGCGTGTACCGCTACTCCCACTTGCATAAATCACACAGTAGCAACCCCAACAGTACATGATCCACGCCACACCATGGCTTCCGCCTGCGTCAACAACATGGGACTCGTCCCGCCGCCCGAGAACTTCTCCTATGGCAGCTGGCTCAGTCCCCGTCTCTCATTCAGCAAAGAGGAACCTTCTGGATCCAAGTCATCAGACCCGATCCACGACCCGGATCCAGAACCCGACTTTGAGTTCCGCGGTCTCGACGGACCCCCCGCTGCGATGCTCTCCGCCGAC…
>Peanut_newGene_2339	Peanut_newGene_2339.1
TAGCACCAAAGAATCTTCGAGGTGGAATTGCAACAACAAATCAGGTAGGAAAACATTAAGAATGATCATATTACTTGTTTGATGATTAAAATGTTGAAGCACACCATTGGAGTGAATTTTGGTCTTAACTGCAATTGTATTGCAGCTTATGATTGTTATTGGAGCTTCAGTCTCATTCTTAATAGGAATTGTCATAACTTGGAGACAACTAGCTCTAGCAGGCACAGGCAATGAAAGAGCAAGCTCAACTGAGGGAGAAAATGGCATACCAATACAAGCTTGGTAACTTTGAGGTGAGAATCCCAAATTAAACTATTTGAGGCTCTTTGGTTGGTTTTAATGGTTCTGCTTGTTTATTTGTAATTTTGTCACTATAGGCTGCTGCTGCAATCCAGAGAA…
>Peanut_newGene_2341	Peanut_newGene_2341.1
TTAATTTAGATCTAATGTTGTTTCATTCAATCTTATTAATGTGTATTTTAATTTGCTTTTTCATTCAATCTTATTGATTTATTAAAAATTTGTGTTGGCGGTAGCATAGGTTATGGAAGATTGGATACAATTATATCAGCTGGATATATACCAAGCTCAAAGTGTTAGGTGTGATGCTAAGAGCTTGGAAGATGCACTGATCAAGCGTGTGATGGTAACACCTGAGGAGGTCATTACAAAAACCCTTGATCCTGTTGCAGCTGTTGGTAGCAGGGATGCATTAGCCAAATTCTAAATCTGTCATTGGAGTTCTTGATATCTATGGGCTCTTGCTAGCTGATGGCTAGTTGATATTGTACAATTTATCATGGCACTTGCTTTCTAACAAGGTTGCAAGTT…
>Peanut_newGene_2346	Peanut_newGene_2346.1
TCGTTACTGATTTGATTAATCTAGAATTATTGTTGAATTTGTTGCAAATAGATATTGAAAGTTGGAGCTTCCTTTGACGTAGATTGGGAGTAGTTATGTTTGTGAATTGCTGAGTTGGTGCTATCTTATGAAATTATGGCTTGGTTAGAAATATTGATAGCAATGTTGGTTCAATAAAGATAAACCATTTTGGCTTCTATAACTCATAGTAAAAGTAAGCAATATTCATCACGAGTTTTAACTTTTTGTCTTATTTTGGCATATATATGTTTAGGTTGCCAGTGCAATTTATCAAATGGATATTAATGGGCATGGCGGTGATGAGGAGAACGTGGGAGATGCTGCAGAAATATAAATATAGTTATAAGAATTTTGCACTCTAACAACACAACAGGTAGC…
>Peanut_newGene_2349	Peanut_newGene_2349.1
CCACCATCCTACCCCTCTCTTTCTCTCTAAAAACTCTGGAGACTGGAGTGAAGAACCCAGCCCCAAACCTCCTTGGAGCAGCACCCAGCCACCATCCACTCTTCGTCGCCGAACTCTTCTCCTCGGCAGGAGGGTGCTGTCGTCGCTCAACGTTCCTCTTCTCCTCGCCCTATTCTCGTCGTCTGCTCGTGGTTGCTCGATCCTCCTCTGGCGACGTTCCTCCCTCGGCAGATCTGCTGGGAGCTACTCTCGTCATCAACGTCTCTGCCCTCGTCATGAAGCCCGCCTCTTCCCTCATCATCAAGCCCGTCTCTGCTCGGAGCTCTTCTCGTCGCCATCGTGTCTCTCTCTTCAAGCTCTCTGTCTCCCTCCCACGGTTGCTTACTCACAGTAGCAACC…
>Peanut_newGene_2359	Peanut_newGene_2359.1
CGAGTATTCACTAAAAAAACCAAAAAACCCTAACAGATTCACTCTCTCCCAAGTCCCAAGGCCCCAACCATCCCCAACCTCTGGTTTCAGCTCACTCCCAAAGAATCACAGATTCACTCGCTCTCGCTCACTCACCGCGTTCCGCACGGTCACCGCCGAACACAACGGCTGCCAACGACGGTGGACGTCACTCGTCACTCCCCTAGCCGGTTCTTCTGCCTCGTCCCATGCTGCTAGTGTCTGCTCGCCTCTGCCTTCTCCATCTGTGTCGTCCCCGCTGCCTTGGCTCCGGCGTGCCTAGCCTGTCTCTGCCTTCGCCTCGGCCTCGTGCCTCTTCTGCCTCTGCTTCCTCCATCGTCATCGTGTTGGCTCCTCTTCGAAGCTCTGCTCTCGTTCACC…
>Peanut_newGene_2365	Peanut_newGene_2365.2
GCCGTTTTCACACGCATATAAAAAGAAAAAAGTTGCAATCCCTAGCTCATTCAACGCCGTTCTTCCTTCTAGCTAGGGCTTCTATCCTCTCTGAACATACAACACTCTCATTTCCTCAGTGTAAAGAAGCTCTCCGACAACGCCTTCTTCCTTCTAGGGCTTCTCCTCTCTCCACCGGTTACGATCTCTTCAGACGAAGATTCCGGCGAGAGGCAAGGCTCTGGTGACCTCAGCATTTCGATTCCAGAAGGCACCGATTTCTTTGTTTTTGTTTGGGTTAGGATTTCAAAATTGCTTTTGATGCTGATTTTTGGGGTTTTTGTTTCTCTGCAGCTCTGTTAGAGATTTTTGGGTCTTCCGTTGAAGCATTGGATTGACGTTGGTGCGGGGGTGATTGAC…
>Peanut_newGene_2366	Peanut_newGene_2366.1
CAAACACTTAGTAATTTTTCTTTTCCTTATCACCAAATCACACTCACCTTCGAATACCCTCACTTTCGCCTTCTGATCAGAAAAAAGTTTCGCCCCTCACCTTCGCAAATCACCTTCGAATTAATTGTTGAAAACCCTTCCCTAACACACCCACACACTCACACTCATTCTCACCATCACTCACCACTGCCACCACGCCCCCCTTTCACACACACACACCCAGATCCGAGAGAAAGAGTGAACCAGAGGGAGGAGAGGAGGGAGACAGAGATGAGAGAGCGCGATCGAGAGAATAGAGAGTGAGAGGGGGTCACCGCCGCAACGTCGCTGCAGCCGCCGCCATTGCCGTCGCAGAGCAGGGAGCCCAGAGGGGAGAGAGAGATGATTTGCAGACGAGAT…
>Peanut_newGene_2377	Peanut_newGene_2377.1
TGGACCGTCTCTCTGTCTACCATGTAAGAGGAATTATAATTTACCACTTATATTGAAAATTATTACTGTATTTTTTTTTCAGAAATAATGGATTGATTTATAATGAATTGGATGCTGAATAATTAATGTAAGCTTGAATTATCTCTTCATAAAAATTTTTTTCCCACTTGAAATTGCTTAATTTTGGAGTACATCTTGCATTGGTGTGTTTAAGAACTTTGGTAACTATATACCACCAACTAACTCTGGTTTAAGATGATAGAGGAGCTATATTGAATCATTCTTTTAAGTGTACATCATATGTGACATTAGCCCTGTTTTTCTGCATTGTAATTCTTGATTTATTAATTGAAATTATATCAATTAAAGAGAAGTGGCTTAGTGCGTGGTGCATAAAAC…
>Peanut_newGene_2387	Peanut_newGene_2387.1
TCTTCTTCTATCTTTATTTCATATTCAAAGGGCTAAAATAGAAAATTGATGAACAATAATCGTGGTGTTTAATTAATTATTGGAGGAACTGAAGAGCGCTATGAAGGAGGGTGGTGGTCGGAAGCAAGGTGCAATGTCGCCGTGTGCGGCATGCAAGCTTCTCCGGCGGCGATGCGCAAAGGATTGCGTGTTTGCACCGTATTTCCCGGCTGATGAGCCCCAGAAATTTGGGAGTGTCCACAAGGTTTTTGGTGCTAGCAATGTCAACAAGATGTTACAGATGATTCCTTAGTACATATAAAGAAGAAAAGGATCAAGGCCATATAAATTATCTTTACTAAGCTACTTCATCAAGCCACAATGTGAAGAGGATAAAGTAATGTTATTATTACTAGGTGG…
>Peanut_newGene_2390	Peanut_newGene_2390.2
GGGAGCAACAGAAGGGGGAAGGAGAGGAGTGAGGAGCTAATATGAAGGAGCAGAAGCAGTCTGGGGGAGGCATCGAGATTGTGAAGCTGGAATTTCCTAATTTCCCCAAATTTCTTATAGCATTCCCATTCTTTCCATTATTCTATACATTCTACATTCCTACAGTTTCATACATAGTCTTACTTATTATGCTTCCATACAAATATACGACTGTTCCCCTCTTGATCTGGTATCAGTATTTTGCTAAATAGAAAATACTTTGGAAAAATTATCCGGTACGACAGTCATTTTTAGTGGAATAGTGTGTCCGTGTATGGATGGTTAGCCAAGTCTAATGTTTATCTTAGTGAGTGTGGAAAGGACTAATATATCCCTAGTTTCTGAGGCGAATTGACAAAA…
>Peanut_newGene_2394	Peanut_newGene_2394.2
CACACTCAAGCCGTAGGGTTCCCCAAACGACCAAACCTAAAACCCAGCTTCGTCAACGGAACCGCCGCCGCCGTCCGTGGTTGTCGGCGCCTCCGGGGCCTCCTCCTTCCCCTGTCCCAAATCCATATGGCCAGACCTTCTCTTCTAGGCTTTCTAGCTCGGCACGTCGTCCTGTCTTCGTCGGTGACTTCGCTGTTCGAGGCTTCCAGCTGCTACGCCGTCGTATCTCCGTCGTCGTCCTGCTGTCAGTGGAAGATGGAAGTATTAATCAAGAAGCAGTGGCTGATAACAATGCATCTTTGAGTAATAATTCGCCTGCCAAGAAGCTCTTTGTAATTTCAGTTATGTTTTTAACTTTGTAATTGCTGTTTTGTAATTTCTGCTGGTTGCAGGTTTAGA…
>Peanut_newGene_2407	Peanut_newGene_2407.1
TAGTGTGATTAGGGATTACTTGTTGCTGTTTTGTAATGTTTGTTGCTGAATGCTAAAAATGGAAATCAAATCAAATGCTGTTTGTTGCTGAATGATAATTTTTGTTGCTGATGCTGAATGCTGAATGCTCTTGGTAGTATTAATTTTGTACTGCTATTAATTTTCTGGCTGTGCTGCTGTTGTGGGTTCTGGGTTCTCGTGTGCTGTTGTGTGTTTTGTGGCTCTGCTGTGTTGATCGTCTTTCTCAATTGTCAATGTTCACTCTTCACTTGCGTTGTGTTGATCATCTTTCTCAATTGTCAATGTTCTTTATCTGAACTGAGAAGGAAAATGGCAATCTGAACCAGCAAACGGATTTCCGCAGCGTCAGCGCGTGCTCACACTTGCAGGAACAAGAAA…
>Peanut_newGene_2415	Peanut_newGene_2415.1
CGTCGTTCAAGCACCGTCGCTGTAGTAGTTGTTGTTATCACCGCTCTCCTGCAACCTCGTTGTTTCTTATTTTAGGCTCTTGTTATGTTTTTTCCTTTTGTGGCAGTTCATATCAAAAATGTTATAATAGAAATCACGTGTTATAATCAAGCTGAGACTTTTTTTGTTGACAATTGGTAGACCGTATGTAATATGAGGAGAGAAGCCTTAAATCTATTTCATTTCAGAATTCAGTATTTTTGGGCTTGAAGTTTGTGTATCATTTTTATGTTTATCTGCAGGTATGGTGATAATGAACTTTGGGTGATTAAAATCAGAGATAGTACTTTTTTATGGCACCAGGTTCACTGCATGGTTGCTGTTCTATTCATGATTGGCAAAGGCCTGGAATCTCTAAAT…
>Peanut_newGene_2419	Peanut_newGene_2419.1
CTGGTGCAATTGGCCAATCTCTATCTTTGCTGATGTCTCAGGACAAACCTCCTATGTACTAAGTTAGCAAATAATTATTATACATGATGATGGAGCCAGATTATTAACCAATTCCGTGAATAGTTGAGGACTTAGCAGACCCCATTGATTGAGGCCCTTGTTATAAACTTTACACAAAATTCTTCTATGAGTTCACTGTCAAACCAAGACTTCGGAGGGTGGCATATTTGTGACACAGGTACTATAAGACCAATGTCCATAATATTCAGGTTAACCGAGGTCTTTTCATCTATCTACAATACATTGAGACAGGTTTTTAAGTGCTTCAGATTTTTCATTAAAGCTGAATGCAGAA
>Peanut_newGene_2420	Peanut_newGene_2420.1
CTTCCCCCCTTTTCTCCATTCACGCGCAGCAGCAATAGGGGAAAAAGGAATTAGGCAGCAGCCTCACCTCCCTCAACGTAGCAACACACAACACCCCTCCAACAGAAACAGAGCAGAGAGTGAGAGGCTGAGTTGCGGCTGATGAGGGGAGGCGGGAAGCCCACCGCGTCGCGCCGCCGCGTCATCACCAATCTTGCTTGCCCGGCCGCCGTGAAGCTCGTCCCTGCCATGGTCTGTCACTGCCTATCACCGTCGGGAGCATCCTTGTCGTCGCCACCATGAAGCTGCCGATCTAGCCTGAGTAAGAGAGAGATCGAGACGAGCTTTGAGGAAGGGAGAAGCTGCACTGTCAGCGTCGCACAGAGAGGGACTCGCCGCAAGCTCCGTCGTCCTCACTGC…
>Peanut_newGene_2425	Peanut_newGene_2425.1
AAATGCTTCAACTAGATTTCTTTGAATGCTCTGATTCTTATTTCTTCTTTTAATAATTATTGTAAAATTGTAAAAGCTTAAATCAATGCAATGGTAGTATGGTTGAAGTAAATGCCTATTTCCTAATATATAGGTGAGTGATGCTATGGGACAATGATGTTGCTGTTATTATCATTTTAGGTACCGGAAACAATGCTTGCTATGTTGAGCGAATTGATGGCATTCCTAAATTACAAGGTGGTGTCTCCTCTTCTAGAAAAATGGTGCTTGTTAACTACGCAAGGTCATCTAAGGAAGCTGACGAGGTTTCCAAGGAGGGCACCGATAATGGGAGGCTCGGATTGGAGACTGACAAAGGCCAATCCTTGAAGACAAGAGACTTCTTAAGTGGTACCCTAA…
>Peanut_newGene_2427	Peanut_newGene_2427.3
CTCTGTGTCTTTTCCACCTTAAATTTTATCTTCGCAAGTGTTAAAATTCGAGATTGGATTATTAAATTTTATAAGATTTAGTACATTTTTATAGGAAGAGTCAATGAAGATTTTTAATTAAGTTTGATTTGATTATTAATTACATTACATTGTTCCATCTGGTAACATGTTTGATTTAATGCTTTAAGATGGAAAGGAAGATTTACAATATGTTATGGAGCTCTATTGTGTATCTTTTGAGGAAGTTCACTAATGCACTGAGTTCATAATTCAATTTTGTTGTTGCTTTCCTTATTGAATGCTCATGATCCATTATATGTGCTGTGTTTCTAATGAGATTCTTCTTTTGTTTTGTATTGTTTGGTCATCTTTTCATGCAGGGTTTTCATACATCCAGAA…
>Peanut_newGene_2428	Peanut_newGene_2428.1
CGCGTGATGATTTCTTCGTTGATGAGGAGCACGGTCCTGTGGTGGACCACCCGATCTGATTGATTGTTTTGTATATAGCTTCTGCTTTCGTTTTATTGGTTCCATAGAGCTTCAAATTGGAAGGAGGCTTTACCTCCAGGGATTAAGGGATTCTGAGTCATGGATGTGATGTCGGAAGCTCTTCGAGCTTGTCAAAAAACTTCCATGAGATGGATTCATCATCTGAAGATGAGGATCAGGGAACTCATCAATGTGGTTCTGGCAGTTCCAAAGATAAAATTCCTCTTCCTGGGCGGCTGTGGAGAAGCTTACTATTGCAGCACATCAGGTGCAGAGGCTGACTGGGAATCTTCGCATTCTTTACTCTGCACTGGCGAG
>Peanut_newGene_2432	Peanut_newGene_2432.2
ATCAAGTCTCCACTTTTATTTTAACATGGTTGATCAGCTTGACATTTTCAGCATATCATTGGAAAGCTTCCATCTGATGAGATTGAGCATGTGATTAAGACACCACAAAGCAGCATTGAGAGTTTGTTGGGGCAGATACAAACATCTCTTGAGCCATGTCCACCATTGATTGTGATCACAGATCAGAGAGGATTTTGGTTACGTGGTCAGAGCCCATCCCCCGAGGTAATCAAGGATATCACCTTGCTCATCATTTGACTCTCCAACAATTATTAAAATGCAAAAGCATTTATATTATACTACATTCCATGTCTTTGTTTTGTAGGGTCATTTTATGCCGTGGTTTGGACATTATGAAGCTGCATCCAGGCATAATCTCAGGTCTTTCTTCCAAGCCAA…
>Peanut_newGene_2439	Peanut_newGene_2439.1
AGAAATAATAAGCTTAAGAAGAAGAAAATTTCTTGAATCAAGGGGAAGAAAAACTTGATGAAACATGCAATATCTGGAGCTCGACCAGCAACTTGGTGGAGGCGAAAATCACTTCTAATGGGATCTTCTTATTTTCTCGAAAACCCAGGAGTTACATTCTTTCCAGCTATAGTAGAGAAGGATCGCCAAGAGAACAAAATCGTCTTCATAGTTTGGGTTCAATTTGAGCTTTTCAACCATCGCTTGTCACCACTGATGAAAGCAAGTTAGAGGCACAATTGGGAGGAACCCATTCAAGAAGGACAAGTGTCTCTGGTTGATGGAAATCTCTAGTGGAGCAATTGAAGGACTAGGAGTTGTTCGTGGAGAGCTTTCCAAAAAAAAACCATAAAAAATCTT…
>Peanut_newGene_2448	Peanut_newGene_2448.1
GCTTCATGCAATGCCGACGCGTGGATTATCCCGGTAAGCCATGTTGGTTTTCAACGTTTCAAGTGGAATTAGTCTTTTGGAAGAGGTTGTTGATAAGAAATTTCTCTTCAAGTTGTCTGTCACCTCCAAGAAGATGAAATTTGTGGATCCGGTTTATAATTGCTCATCCATTGTGGTATTATCTAAGGATTCCGCCGCAGATAGTAACGGTGATAGTGAGGAACAGACTCCTCTTATAACTCTTGTGTTCATCCATTGCGACATCATCTAAGTAATGCTGACTATGGGAAACAGACGCTTGTTAGAAGAGTAGTTCCTGCTCCATTGGAAGCATCACCCTTGCCTGAGATGTTTCCAGTCGAAGTTCAAGGTTCTAGCTAGGGGTGTACATGGCCAGGT…
>Peanut_newGene_2457	Peanut_newGene_2457.2
ATATCTGAATTGCTGAGATTTTTTATCTGGAATTTGCATGCATGTTCTTGTTCCTTCCTGTTCTTGTTATGACTGGTGATTTAGGTCATAAACACACTAAAGAGGGATCAAACAAACCACCATGACTTAACCTCACCCATTCACAGGTGTGAGGGAGTGGAAAACAAAAATTAGCTTCTTATTGTTCTCAACATGAACAAGGAGAAGGTGCACTTTTTGGCTTGCTAAGAGGCATCTTTCAGAACTCATTACTAACTGGTCTATATATGATAATAAGCTACTGTGACTATTTGAGCCTCAGAGGGTCGAAGAGGACCCAATTTGATTGAGGTAATGCAAGAGAGAAACTTTTGGATTCTATTGAAGATCTGAAACTGGACTCAATTGTACTGGGAAGCA…
>Peanut_newGene_2464	Peanut_newGene_2464.1
ACTCAATTCTCTTTCTCTCTCTCTCTCTATTCATGCAGCATCGATCAGGTCTCTCTCTCTAGAATTTGTAAATCAGATAGAGGAATGCGTCATGCTGAATAGGGATTTGCAGGTGCAGCTTACTGAGATAGATGTATTCTGATCACAGATATTTGTAACCACTGGAGTTAGTGTTCTTCTGATGTATCCAACACGATCGAGACAAGGGAATGACCCGAACAAGCGATAGGATCAAGTCAAGGACTAAACTTTGTGTACGACCAAGATTGGATTGCAGCTCAAATCTTATGGGCAACAAGAAAAGCAAGAACAGGAGAAGGACGACAGCTTTGCGAATTACCAAAATCTTGTGTCCTGGGAATCGGCACCTGCAAGATTTGGATTCTAACGTATGTATCC…
>Peanut_newGene_2467	Peanut_newGene_2467.1
TTTGGTTTGCAACACTGTGCCACTGAGCGTGGTCACAGGTCATTGCAAGATTTCAGCTTGTGTTCTTGCCTTGTACTGTACAAAATTGGAAATAGGGATCCCAAGCTTGAGAATTAGGGTTTGGTGATTGTGTTCCAGGGATGAATAGTTCTGGTTTGGGAGGTAGTTTTTTAGGTGGTCCTGGTGGGGGTATCTTGGACCTCGAAGTGCCATTTCATAGACACCAACAACAATCCCAGATGGGTCATCCGTCGGTGACGGGAC
>Peanut_newGene_2468	Peanut_newGene_2468.1
CAAACACAACTTTAGTTCACCTTTTGGTTCTAATTACTCGTTAGTCTATCTCTCTGTTCTCTCCAGAAGCCAAAACTAACAACGTGTTCGTTTTATCCAGTCCACCTCCTGGACAAAGATCCAGTCATAAGGAGCCACGTGTCAGTGCCATATGGACAACTCCAACTTCGCTTCAAGGAACTTGCAAAGCTCAAATTCACAGTAGCCACCAATTCCTCACCTGCAGGCAAAGCCTCACATTCAAATCGTGATCTGCACCGTCATATCCACATCTAACGGTCCACATTATCTCCATCACCCAAACATTACAAATTTCCCTCCACACAGCACTACTTTACGTGGTGCTGATCCGTCAACTTGATTCCGATGGCTTCCTCCGTAGTTCTAACCACCGTCTTT…
>Peanut_newGene_2469	Peanut_newGene_2469.1
CTTTTCTCAACTTCACCATTCACAAATGCACCATCACTTTGCGGCCCAAATTTTCTAGCACTATCAACCAAGTTAAAATCTTTCTCAGCAAACAACTTCTGGGTTTCTCCATAAACACCACAATTTGGATCAGAATCTGAATGAACCAAAATTTCCCCAACCTCACCATTCACCATTGCACAATCATCATCATCATCATCACAAACACCATTTTCCAAACCACACTTTCCACCACTAGAATCAACCAAGTTACAATCTTTCTTCACAAGATTAACAAGCAAATAAGGTTAATTGACAAAAGATACCAAGTTTGTTGAGAGAGAAAGAACAGAGACCAGAGACACAGCTCCGAGACGGTGACGACGGTGACGACGCAAACCACGGGCGCGCAAACGGCAG…
>Peanut_newGene_2472	Peanut_newGene_2472.4
AATTAAACTACTCAAGGGAAGTGAAGCCAACACACAACACTTGTGCAGTTGTGCTAGCTAGCTGCCACCACCATTCACATGTTAATCCTGGATCGTGCATCTCATGCTTATTCAAACCAAGCAATAAAAGCATATTTCATGAATGATGATGATGTCTTCATCAGAAGCCTTTTCATCATCACCATCAGCAGCAGCTCCTTCGAGTTCCAGCATCATCCATTACGGAAACCCTAATTCAATTCCAAGAGTAGTGAAGAGAAAGCGAAGTCAACCAGGAAGACCAGGCAAGAAATTAAAGAATACCTAATATAATTTGAAATCTGATATTATATATATGAATTGATGAATTAAAGCATGCAGATCCAGAGGCAGAAGTAATAGCTCTATCGCCAAAGTCGC…
>Peanut_newGene_2479	Peanut_newGene_2479.1
AACTTCCAAAAACGAAAATCCTAATTTCCTTTAAAAAAAAAAACGATAACTTCCAATCCACAACAACAAAGTGTTCCTAATTTCGTATTTCCGCCACCGCCATTTTATGTTGCATTTGTGTGCAGCCGCCGCACAAGCAGAACGCAAAACCACCGCGTCTCTGCGTTTTTCATTCACAACCACTGCCGCACAAGCACACCTCAGGGCGCCGCCACCGAGTCTGGCCGCGTGCTGCCTCTCGCGGAGTCTGAACTCTGTAGCTCTCCATCGGCGGCGAAACTCATTGCTCCCTTCGGCCGTCGCTTGCTGTTCCTGAACCGTCCCTGAATTTCTCCAGTCTTCACGGTCTGCTTTCACTTTCAGGAACTTGTTCTTGACAACCTTGTGTGTGCTGAACAA…
>Peanut_newGene_2503	Peanut_newGene_2503.1
CTGGTCATCCTCATCCACCGTTTCAGGTATAGTTTTGCATGGCTTTCAATTTTTGATGTATTCTCATTTGAAATTATGGTTTCTGTGCTGTTCAGGTATAGCTTCAGGAATCGAAAACATTACACACTAAATAAACCAACAAACCCTAGCAACAACATTATCAATCTTACTCTCACAACCATAAAAAAATGAAAGTAAAATCAAGCTCTGCTGCTGACACCGGTTTTATGGTGGTATTTTTCAAAGCAGCATAACGTGTTTTCTATCTTCTGTGTCAGCTGAGCTTCATCACTCTGATATTAAGTTTTCTATCTTCTGCTATTGGTTCTTTTTGTTCTTGATTATTTTCATGCCTTAGCTTTAAGAAGTGTTTGATGTTGTGGTTGTAGTTCGGAGTAA…
>Peanut_newGene_2518	Peanut_newGene_2518.2
ATCTCGTCTCCATCCTCCTCAATTTTTTGCTCTGCCTCTTCGATTCTCTCCTCAAGATGGAAACCACAATCGCGTGTTATGCTCTGAAGTTCTGAATCCATCTTTTAATCCTCTTCAATCTCTTGCTCTAACTCTTCGATCTCTCTTCCACCACTGTCATCGAAGCCTCCGTCGTGCCATCGTCACTGTCAACGTGAGTTCTCCACTCTAGGATCTGAATTGGAAACTCTTAAGGTACGTAGCACATAATCTATTGTTTTATGCTTGTGTTCTTGTGTCTAAAGTTAATCTCGTTGAATTGAATCCATGTCTTCTGAAAATTGTGCCTTTTGTTAATCTCATGCTTCACTACTCATTTCAATCATTTTGGAAATGAAAAGGTTGATTTGATAGGTTCAC…
>Peanut_newGene_2523	Peanut_newGene_2523.1
ACGAAAAAGATTCTATTTTGCCGGGGAGTCCGTGTAAAATTAGTAAGAGAATCCCTTTTCCCCTTCTCGCTTTTTGGAGATCAATTTAGAGGGGTTTTTGTTTCTAATCTGCAGGAGTTCTATAAATCCCATAATAAGTTCTTAATCCTCTGAAAATGAAAACCTAAACCCGCAAGTCTCAACATCACCTTCTCAATGCTTCCCTAACCAGAAGCTCTGTTTTGCTGAGCCTTTGTTCGTGTTGTTGTTGTGCGTCTCTTCGATTTCTTCTCGTCAGAAACTCTGTTCGCTGGCTGCTGCTGCAACTGGTTGCGTAGATGACGCTCCTGCTTGCTGTTCATGTCGTTCTTTTAGCTCTCGATAAGTGTCTATTTTGCCCTTCTTCCACAGTTGCTCCAA…
>Peanut_newGene_2525	Peanut_newGene_2525.1
ATAAGAAGCAAATATAGTACCAAGTAAAAGACATCCTTTTATTATATAAGTCAACAAAATATTGTGACCATGAAATCCTTGTCTAGCTTAATGATTGTTGTTATGGTTGCCATGACATTGATGCTTTCAGTTGGAGTTAATATGTCCCAAGCTACTAGGATTCTTCATCATCACCCAAATCCTACTCCTTTTTCTTCTTTTTCTTCATCTTCAGTCCCACAAGTGTTATCTTCATCAAATAGAGTTTCAAAGAAAGAAGAGGCTAAATCATCAAAGTCAGTAGTAGCAGCTAGCCTTAGAAGGATTCCACCAAGCAGACCAAATCCTACTCAGAACAACAGGTTGAAGCCTAAGATTAGGGGCTAATCCGAGCTTGAAGAACTGAGATGAAGATGAAAC…
>Peanut_newGene_2533	Peanut_newGene_2533.1
ACCAAGTGCAGTTTCTTCCTCAAGCTCGCCGTCCGCCGTCTTCTCTTCGTTTGCTCAGCCACGCTTCTGCCGCCGTTAGTCGTCGTGCTCGCCTCCTGGTCTCCGTCTCGGTCGCGCTTCTGCCCCTCTGCTCAGACTGCTTAGAACGAAGGATTTGTGTTATTGCTAAATGGAGTCACACGCAATGATTCTTCCGTCGTGCTATTATTCAGTTCCTCTAGTATTGTCCACTACCCAACCTACTCCTCCATTTCTTGCTTTTCCTTCAAAAACTTCTCTTTCATTTCCGCGCCTCAATTTTCCTACCACAGCAGGAGGAAGGTTGTGGCACTGTCTAACTG
>Peanut_newGene_2538	Peanut_newGene_2538.1
TCAACTTCAGTTTATTATTGTTCCCTCTAATATATAGATATATAGGAATTAAGAAACATGAGTTTTTCTCTCAACTCTCTCACAACTCATCATTATCATGGGTCTCATGAAGAAGTTCAGCATCCTCTTCTGCCTCTTCCTTCTCATTTCTGTATCACTTTTTTCAACTTCTTTTGCAGGAAGAAGATCAGAGTTCATGAGTAACGTGGCTGCAGATGTTAGTGCAATTCAAGAGGGAACATCACAGAAACCAGTGAAAGAAGAAGAAGAAAGCATGATCCATGAGAGGCTTCTTAGGGCTAACACAAGAGATTATGGAAGATATGATCCCTCACCAACATTTTCTAAGCCCCCTTTTAAGCTCATACCCAATTAATTAATTAAATTAAATTAATATTT…
>Peanut_newGene_2539	Peanut_newGene_2539.1
CTCCAAGTTCTGTAATCTCTTCTATTGGGCTTGTTTGTGAGGCTGAGTTAGAGCGCTTGTATCAGCTATCCCCTCCTCGACAATGACCTTGCTCTCAAGGTCCAATTCTGGAAACATATGCAGCAGCTAGTCGAAGTCCACCCAAGTTGTCTCCTCCCGTGGTAAGCCCTCCTAATCCACGAGGACCTGGTCCACTTGTTTTCCATCTCTCGAGACGGAGTGCTTCCCTAAAATCGCCGTAGGTGCAGGTTAGAACGTTGTGGGTGCTGCAGCCAGCACCAGGGTCGAGGCAGTACGCCACCTTCCCAACACGTCGCGGGATGTGGTTAAAGAAGCGCTTGCCAAGCTCTGGATGCTCCCTATGGAAGAGGGATATTTGAAGGTAAAAACCCAACTCAT…
>Peanut_newGene_2541	Peanut_newGene_2541.3
CCAAACGGATACTACGCAATTACCTTGGGCTGATATCTCTGAAGGCACCGTCCATTTCAGACCTAATTTTGATCAAAGCCATTAGCTCTTCTCGCGGCCACCGGTTCGCGCCGCTTGAGTTCCTCTGCGTCTGCCTCTCCTCGCTTCTGTCAACCAGATTCTTCTCAACGAATTGAACCAAAAATACGACTCCTGGTGTTCTTCTCATGTTCTTGATTCGCAGGTTTCGTGGTAGCCGAAAAGAAAATTAGTTTTGCATTTTATATTTCCTACGTTTTCAACTTCTAATTTTTTAGGAGGGGCCAGCATGGATAGTTGCTACCGTTGTAGCCATGGATGCTGGGAAGGATGAATGGTACTATAAATCTTGCTGGAGGTGTTCCAAGAAATGCATGGGCA…
>Peanut_newGene_2545	Peanut_newGene_2545.2
CTCTCATAAACTTCGTTCCGAAGGCAACTCATTTCCAACACTCACACTCACTCCAACACACTTTTCTTCTTCCAACTTCAAAATCCCACTTTTCCTTCGCCATTTTCCCATTCCCACTCCTCATTCAATCAGTTATCTTTCTACTTTCTCCTGTAATGTAATTCCTTTTTTTCTGTTTCTATAATTGGTTGATGATCAAGACGGTGTCGTTGGATTGTTCAGTTGATTATGATGATGATGATGATGCTTGATTAGGATCTTGAGAAAATGGATTCTGAAGGAAGTGAAAAGGAGACCGTGGTTACTCAGGTTAGCATTGGTGGATTTGACCGTGAGGTCAGAGCAAATGATCTTGTGGTATTCTTGGAAGAGAAAATTGGAATGGTAGATAGGTGTCGC…
>Peanut_newGene_2547	Peanut_newGene_2547.1
CACTTTCCAAACACAACCGAAAATCTGCCACCATGGACGATGACCCTTACAACCACAACCACCGCCTTCTAACCCTCCTTAACACTCTCAAACAAGCCTCCATACATCTCCACACCACCACCAACCCTCTCTCCTTCTTCCTCTTCAAACCCGATCAATCCAATGCCGCCATTGAAGCTCTCCTCGAGCTCGAACCAAAGGCACAAGCGCTCTTCTCCACAGACCCTAGCCTCCGAACAATCTCCCACACTCTCTCCAACCTCAAAACTCTCATAAAAAACCATGGCGGCGATGGCGGCACCTTCCTCCGCCGCCAGATCGCTGCGTTCAAGATCTCGAAGCTCGCTCTCTCCCTCGAGTCTGAAATCCAAGCCTACGTGGACCGCGTAACCGTCATCA…
>Peanut_newGene_2548	Peanut_newGene_2548.13
CTTTGTAATTCAATTCCAATGGCTTTGAAAACTTGCTTCACTCTTCTCCACTATTCACAACACTCTTCTTCCAGAACCTTCTTCTCAATCCCCTCTTTCAATTCTGCTACCTTCATTCTTCACAATGAACCTCACAACAACCACATCCTGCATTTTTCAACATTTTTTACTAAGAAGGAAGCTCCATCTTACTCTTCTTCTCACAACTTTTCTTTCGTGCAATTTATCAAACACTAGTGCTGCATTCTTGATGGCTCAAGAATTGGATTTGGAGCTTCAGAGATACACTGATTCGAAGTAAGGTTCACTCTTCTTATACCCTCTTGTTGGACTAAGGAAACCAAGAAAAAAGAAAAAGTAGGAAACCAAGAAAGAAGAAGAAGGAGGAGAAGAAGAAGA…
>Peanut_newGene_2552	Peanut_newGene_2552.1
TTGGATTTTAGCAAGGTTTTCATGTTTCACGCCGTCAGCCCCAACTCAGAAAACCCTCGATTGTTCGATTTTCCTTCTTCTTCCTTCTTTCTTCTCTTTGGAGAGAGAGAGAAACCGAATCGAATTCATTGCCATGGGAACCCCGGAGACAACACGCGAGCCCTGCCCTGATCGCATCCTCGACGACGTAGGCGGCGCTTTCGGCATGGGAGCCGTCGGAGGTTCCGGCTTTCACTTCATCAAGGGCTTCTTCAACTCTCCCAAGGGTTCACGCCTCGTCGGCGCGTCACAGGCAGTGCGTCTCAACGCGCCGAGACTGGGCGGAAGCTTTGCGGTTTGGGGTGGACTCTTCTCCACCTTCGACTGCACCATGGTCTATGTTCGTCAGAAGGAGGATCC…
>Peanut_newGene_2556	Peanut_newGene_2556.1
CGTAATTTAAAAACTGACAACTCTAGCGCCATCGCCTCCCCATAAGACACCTGACTCTACCTTCACCTCTGCCCTGCACCGCCATTGATGCCAACCCAGCCCCTGTGCCGTTGACTACGCCGGCCCCCGGACCCTGCCACCCGCCGGCGCTGACCACGCTGGCCCCGGCCCCTGCCATTGACTTTATTGTTGCTTAGGAGAGCCTTGCAAGTTTGTTTGAAGCTACCCTAAATTCAGCAAGAAGCCTCCTCTGCTTCTCCGACTGTGTGTTGCCACTTGCCACAAGATCAGTTCACGACTCTCTTTCAAGGTGAATCTCACTGAATGGCTTTATGCTATAATTACATAAAATTTTCATTGAGCAATGTTATATGAGCAACAAAATTTATCACTTTTGAC…
>Peanut_newGene_2557	Peanut_newGene_2557.1
AAAATATATTAATGAAGAGATCGTTAGAGTTTCTTTTCAGCTCAATAAAATCAAATTGCACCCATAATAAGTGAGCTGAGTAAGAATCTAGAAGATATCAGACTTAGTTTTTTCATAGTCTGCTATTCCTGTTCTCCAATCTCCACCTTCATAAATCTAGTGCAAAAGTATCCCACATCATTCATTGACTGCATAAGCTAAAGTGATTTGTCAATAATCTTATTCAGTGATTTTATCTGCAATTTTTCATTTGGCTCTCCAACTGTACTTTAGTTTCAATATTCCTTCCGTTGGTGAGAAATTTGAGTTTTATTGCTTTTAAGTGCAAAGTTATGCTACGATTTTCATTTTTTTGCCCACATTTTTCCAACCAATTTCTGAACATTTGCTGCAGAATGG…
>Peanut_newGene_2560	Peanut_newGene_2560.1
AAGAAACTGAAAAGGTAAAGTAAAAATTCAAGGGTCTCATATTCTCTCACGCACACTTTTTCTGGCCATCTCCACCATAGTTCTTGAAGGGGTGATTTTACCTTCAAATACCCAGGCGTTTCTTGCTAACCAGATTTTGCCATAAGAGGTATTCAGTTGGTGGGTGGTAGAAGTTAAAGGCTAATTTGTATCTTGAAGCCACAGTGAAGCCGCCCCCTTTCTCCAGCATCCAGTTAAATGTTACTTTCTTTAATCTCTGAACCACTGCCGGTAAACCCAAATATTTTTTTGATTGCCAACACGAGGGACAAGGAGAATCTTCGCCAAATGGTCTCGGACTGGAATTGGTGTGTTCTTATTAAAGAAGATTGATTATTTGTCCAAGTTTACTTTTTGGCC…
>Peanut_newGene_2565	Peanut_newGene_2565.2
GCCGGTTAAGTTTGGGGTGGCTGATGCGTCGTTCTTTTATTCCAGTTAGTGTCCCTACCCTGGAATCCTCGCCTTTGGTTTTCTGTTGTGTGTTTTGTGGTTTCCACGATATTGATGTTTTAGGAATTAGAAACTGAGGTCGCACGTCACGTTTGAGGAAGCAAGCAGAGCTGAGGTTTCAGTTGTCATTGATTTCGGGTTGAGAGAAAAGGAATTTCTTGAGGCATTTGGATTGTGGTTTGAATGTGTCAAGGTCTGGGACTCAAAGTGGAACGAAAGAGCATACTTCAGCACAAGAAAAGTAAAACTCGACCACGAGTGTCTTTCCATGGCTGTCCTTGTACAGGAAGTGATAAATGCGGACTATGCTTTTGTCATCCACACAACCAATCCGTCCTC…
>Peanut_newGene_2569	Peanut_newGene_2569.1
CAAATTTGGGATCACCTGCTCCTCTTCTTTCCTTGGCTCCGGCTCTTAGTTTTGGATTCCACTACTCATTCTTCATATTCAAAATCTCAGTTTACTCTTCAATTTCAAGATTCATCTCATTCTTCAGCTCCAAAATCAACTTAGTCTTGTTAGATTTCAAAATTTTTTTATTCAAACTTCTTATACTATACGTATTAAGGTCAAACAATTTTATCAATGGCTTCCAAATTGCTATTAAAGAAACAAAGTCAACCAACTGAGACAAGTATTTTTTTATTATTGCTTATTTATGTGAATTGTAATTGTTAAGGTCATTTATAGTCTTCTAGAATGCATTTTTCTTGTTTATTATTGTTTGGTAATGCTGAATATTCTATAATTTGCTATGTTTTCTATGTA…
>Peanut_newGene_2571	Peanut_newGene_2571.2
AACAAAAAGGGGGAAAAAAAAGGGAGAAGAGAGCTTGCATTATTGAGAACATGCATACACCTCCCACATATACATCAACAATGGAAAACAACGAAACACGGATAAAGAAAATGAGCAAAGGCTGCAAGACAACAAAGACATCGTGAAAGATGTGATTCAATTCATTGAATTAGCGACCAAGCTTAGCTTGTATGTTAGCTTTAATTATCATCACTGATCAAGAGCTTTGATGCTGATATTTTTTGCAGGAGTGGAGTGGAATTATATATAGTCCTTCTTTGCCCAGAAATGTTGCTTCTCTCACACAGAACATATGGGAGAGAAAACACATGATCATGTACTTGGTACCGACTGGACTATTCCCACTTTCCCAATTGGCAATGAAAATAGCATTTGGGC…
>Peanut_newGene_2580	Peanut_newGene_2580.1
TGCTAATAACCACTTGAGAGTCACACTACACTACCAATTTCTTAATACCCATAGTCCATGTAAGTTCAAGCCAAGCCCTTTCTCGATGTCCCAAAGTTCTGTCTTGTACACCAAACAACTCCTAAAATGAGAAAACTTTGCTGTCCATCTTTTGTTTGCGTCTTGCAGCAGCCCTCTGTAGCCAGCTTTGGCTGCGTTTTCGCCCCTTGAGTCGTCTGTGTTTAGCACTGTCTACCCTGGTGATAGTGGAGTCCAACTAATGTGGATCTCCTCTCTTTTCTTTGTGGTTATTATTGTTGAAGAAATCCATTGCACTTTCGGATTTGATAAGCTGCATCCACGTTGTTGAAACCTTTGGGCAGTCTCTGATGGTATGGATAATGTCCCCGCTCATTTTCA…
>Peanut_newGene_2585	Peanut_newGene_2585.1
TCCACCGGTTTAGGAATTACTACACTGATCCTTCAGGGAAGATCTCTGCCTCTGGTGGTCGTGGAGGTAGTCGCGTCGTCGTTGTTCTCACCGCTCTGGGCCCATTCGCCTCCTTCATGCACGGTGTCATCTCCCTCCAACTTTGCCGACGGCGATTCAACCCCTCCGCTGCTACTCCGCCGCCCTGGATGGCAACTTCCTCCTCAGCTCGGCCCGAGCCGTTTCCTCCAAATGTGCCAAATGTAGATCCAGGTGTTCTTCTCTTGTATGTTCTGGAATGAGAGCTCTGTTGATTTTGTTTGTTGTTGAGGTTAAAATGTAAAATTGAAATCTGATGAGTCTCTTTCTTCTCCTTTGATGTGAACTTCTTCTGTAAGTTTTGGATTCCTTGCTGATTCT…
>Peanut_newGene_2588	Peanut_newGene_2588.2
AGATCATGGATGAAGGTGTGAGTGGAATATGAAGGATTAAGATATGTAGATCTATAATTTAAATTTGATGAAAAACATTGACGTAGTGTTCAGGATAACTAATGTGTGTGGTTCTGGTTTTCTAGTAGAGGGAAATTTCAGCGAAAAAGAAAAAATGAAGAAAAGTATGAATACGTGGAAGGTTGAGCTGAATTGGTGCCACGTGTATATTAATTTAGGTGTGATCAGTGGACGAGGTAGAAGAGGAAGAAGACCTTCACCTTCCCCTTCCCCTTTTATTTTCAACTTGAAAGTTGAAAGCAAAAACCGCGACTTCGTTGTTCTTCTCAACTCTGAACACTGTGATTTAACTAAATAATGCGGTGCCAATTAATTTCCCACCGTTTTACGTTTTCATCA…
>Peanut_newGene_2592	Peanut_newGene_2592.1
CTCTGTGACAAAGAAAGAAGAAGAAGAAAAACAAAGAACTCGCTTATTCCGTTTCTTTCGCTTTCCGACATTCTCTTCTTTCTTCACACTTCTCTTTGTGAAGAAGAGGGAGGGGAATTTGTTTTGTGGCTTTATTCTATTAGATTGCTGTGAGAAGTTGAAATCTTTGAACTTTGGAGGGTTTTCTTGACTGTTGAATGATTGCAAGCCATGAAAACCAGGAGTGTTTCGAGTGCCGAGAAGGGTAAGGGAAAGCAAACTGCAACTGCAACTGAAATTGCAACTGAACCAGTAGTGGCATTGGGGGATCTGATATATATTCCTCTTCGCGGTGCCTCCAAGTGGTGGCCGGCGCAGGTTACTGATGAGAAGAGTGTTAATGAAAACTTAAGGCCGAAA…
>Peanut_newGene_2596	Peanut_newGene_2596.1
TGTTAGAGCACTTATCCGGTGCAACATGATTGTTCAAAAGTGACCCTTTAATCCATTCCAACATGAATAAATTATTTCGTTTCCTGGTGAATAAAGAGATAAATAATGTGACCCCACAAACCCTCCACCACTCTATCATAATAAATTCTGCCACAACCGCTCTAATTTGCATCCATTCTTGCATCACATTGAATTCATTTCCTAATTCTCAGAATATGATGATGGCCTTCTCTAATAACAATGACCAAGAACTTGGACTTGGTCTTGGTCTTGGTCTTGTTCATGGTGAAAACTGCAGGCAGAAGAAGGAGAAAGAGGAAGAGAATCCATGCAGCAATATTAAGGCATACCCATCTCTTACTTTAGGACCAGAACAGGATTCTAGATCTTCTCAAAGCG…
>Peanut_newGene_2599	Peanut_newGene_2599.1
GGATGATGAAATTTAATTTTTATTCTATTGGTTTTTAATTAATATTAGGCAATGCATATACATATTGGTGGGCTAAGATAGTACTTCTATACAAAAACAAGAGGCAAATTCTTTTGGGTTCTTAATGAACTTTTGTAGCATTTTTGTGGATTAGGAAGTGTTGTCATTATCAGTATGACATGGGTGCATTCATGTCTTTCGATAACTTGTTTCTCAGGCACCATATGTTTATGTAGCAAAGGATTTGCACTTAAGAATGCTTAATGTTTTCTTATGACAACAGATAATAGGAGCAGGCACTTGATTACATGCTAATTGCTGCTTTAAGCTTGAGATTAAAAAAGTCATGCTCTGCATTTGTGGAGATCAAATGTAAGTACTTTTTCTGGAGACAATGTT…
>Peanut_newGene_2605	Peanut_newGene_2605.1
AAACAGAACATCAGAGAGGGAGAGTGAGGAGTTAGGGGTGAACCAGGGGAAGGGAAATCGGAGAAGAGGGAGCCGTGCCTAACCACCGTCCGCTCTGCCGCGCCTCTCGTCACCATCAGGTCCGTCGTCGCCGTTCGTGGAGCCACGAGGAGCACCGCCGTCGAAGCCACGCCAATCGTCACTGCCCAGTCGTCGCTCTGCCTCCCACCAAGCCCGTTCCGCCGCTAACGTCGCCAAAGGGAGAGCGACCACCACGAGGAGCCACCGCCGTCCTCTCTCGTCGTCTTCCTTGGAGCCGTCACCGTCGAGGGGCCAGCAGAGGGAGAGAAAACGAATGCGAGAGTCAAGGTCACCACCGAGGAGAGGAGCTGTGTTCCACGCTGCTGTCGCCACCAGTCC…
>Peanut_newGene_2612	Peanut_newGene_2612.1
CTTGGCAATTGTTTGCTCTTTTTAATTGAACATCAATCTTCAAATTCCATCAACCCACCCCTTTTTTCCTTTCCTTTCCTTTCCCTTCAGCCTTGACTTTGGATCCAAAAACGCAGATATCGAAACCGTTTTGCTCAACAGACTCTGTTTTCTGTTTTATCAGTAGTACGCTGCCCACACACCCCAACACTTAACAGAAACGGTTACAGCAACCGTAACAAAAAAAACATGGGAGAAGAGGTTAAGATCGCCGACTACCCAGGCGGCGGCGCCGACGACGAGCGTGTTTCCGAGTGGGAGCTTGGCCTCCCCTCTCCCGCCGACCTTCCGCCGCTCTCTCAGGCCCTGATCCCGCCGGAGCTCGCCTCCGCCTTCAGCATCACCCCGGAGCCCTACCGG…
>Peanut_newGene_2615	Peanut_newGene_2615.1
CTTCAATCCCAGTGTATTTAGATCCTCCCAGTTGGCACCACCAGCAGCAGGCAAATGGCAATGGCAATGAGAGTTCAACTCAGGTGGTTCCGAGATCGGGATCAGAGGGAGCACTCAAGTGTCCTCGGTGCGAATCAAGCAACACAAAGTTCTGCTACTTCAACAACTACAGCCTGTCTCAGCCGCGACACTTCTGCAAGACGTGTAGGCGTTACTGGACAAGAGGCGGTGCTCTTAGGAACGTTCCGGTTGGTGGTGGTTTCCGGAGAAACAAGAAGACCAAGAGGAGTAGCAGTAGCCGCCCTGGAGGAAACACTGAAAAGCAGTCAACATCAACATCATCACTTCCTTCCGGTTTTAACCCAGGTTTCATGGCTTCTCTTGAGAACATGACCCTCT…
>Peanut_newGene_2618	Peanut_newGene_2618.1
GCTATTGCTACTACCAAAAATAATAATTGAAAGAGGTGAGGGAATATTATTATAGATAGTGGTTCCAAATATGGGTTGGCCCCCACTTAGTTCACGAGATGGATCCTGTCATATCTCATCTCATCTCAATGCTATGCCTCCGTGACCCATCTATCATCATTAACTTAGCTACTTAATTAACTTAACTTGTTCTTTTTATTATCTATGTATCATACAATTAACCTCACCTACATATATTCTTGATGATGATGAAGAGGATTGGTTTGGAAGTCGAGGAGGGATCCCATTGGATTAGTCATGAACTTGGTGGTGACCCCAACGCCAAGAAAGTCTCTGGTCAACCCAAGTGGGTGTTGCATCAAGTTTGAATCGTTATTGAAGGAGGAGAACTGAGACGAA…
>Peanut_newGene_2635	Peanut_newGene_2635.2
GGGGAGAAACTGAAGGTTAGATGGTGAATTGGTGATTGAGTTTTGGAGCACATCACCTAGTCATGTGTTTGCTGTTTTTTTATTGTTTTTCAAGAACCAAAATTGCTTGTAATTCTTTTACTCTGCCAGATATTTGCAATTATGTCACTGAGAGCTAAAAAAAAGATAACTCTAACCTGGTTTTACTAATCATATGTTTCTTGTGGGGTGTGACAACTGAGAACTGCATACATATCTGTGAAGATGCTCTGTAACATTTGGAAGAAATCAAAGAAGCTTTAAATTTTGATGCTAAACACGTATTTATTTTTCTTCTTGTTACAGAGACTTGATTGCTAATTACCGAAATTCTATCGAGGAGCTTGTTAAGTCTGAGCCGTAGGAGCCTGTCAATTTTCA…
>Peanut_newGene_2641	Peanut_newGene_2641.5
CCGCAGCCACCGCATCCCCGCAGCCCCGACAACCCCGCAGCCACGCTTCGTTGTCATAGCCGAACTCGTCTCCACTGGGTAGAGGCATCGCGTGCGGAAGCTCCGTCGCTGCAGGAGCTGTGTCGCCGTTGTAGGAACCTGCGTCGTCTCTTCTGTTCGAGCTCTATCTCTTTGTGTTTGCCGGTGTCGTCGTCTCCTCACCGTCACTCCCCTTCCTTCTCGCCGCCGGTGGAGGAGTGCTCTTTGGTGGAGGACGTTTTTCACCACAGCAGTAGTTGCTATTGTTTTAAGAGCTGCAATTCAGCTTTACGCCACCAGGAAATGCGGCTTATTCGGAGAAGGTGGTCTGATAATGTATGATGTTGGTTCTTCCCAAGGTAACATACAGCGCCGGCGACG…
>Peanut_newGene_2642	Peanut_newGene_2642.2
AAGATTTTGGAAAAACTGATTTTATAATAAAAAGTCTCGTTATATCTACTAATTTTTTTTAATCTTTTCTTCAATAATAACGTATTGATCTATCCTTGTATTTAAATAATTATTTTGAAATTCAGATGTATCGAAGTAAGAAGCTTGATGAGTCTGGTCAAGGTAAAAATTTTAGAATTTTCATTACTATTGAAGGTTTAGTAATTTACATCACGTATAAATTCACAATATTATTTCAGTTTTATCCCAAAGTAGGGCAATGCAACAAGGAAGGCATCAAATTTTGGAGATGTACCAAAGATTAAATGTACAAGCACACTTTGGGGTTGATAACATTATTAACAGGAGTAGTAGTTATGTACCATCATCATCTCTCCCCATTAAACAACAACCATATAA…
>Peanut_newGene_2643	Peanut_newGene_2643.1
GCATATATAAACCTTGTTCTCCCTCTTTTAATTTCTCCTTATCCCCACACAAACCCCATATCTCAATTCCCTTTCTGATAAGGATCTAAGCCATTCATTAATAATGGCTGCAGAACATGTTCTTGAGTTGTTAGATACCTACTGGTTTCAAACAACAGTTCTATCAAGTTTATCCAAAAAAACAGATATTCCAACATCATCACACAACCACCAAGATCATGTTTTGGAACAACTTTGTTTGGATCCAAAAAAGCTTCTTAGAGTTCCAACACTTCAAGTGAGGTCCTTCAGTGACCAAAACTTATTATTAGGTGATGCTTCTTTCTCTGATGATTCCCCGTCACTGGATTCTGTCCTCCTCACACCACAGAAACTAAGGCCAATTCTCTCTGGCAAGGA…
>Peanut_newGene_2648	Peanut_newGene_2648.1
AAAGGAAGAAGCCAGAAAAGGCATGCCATCTTCTGCATAGGGTATGGATGCTACAGGTATGGAAGCAATTTATAAACTATTTATGGCATAACCACTATCCACCTTTGTTCAGTAAATTATATGCAATATTCAATAATTCAATATATAAGCAAGAGGTTCTTTTGAGGCAAAAATAGAACTACCCATTCTTTTTTTTATGTCACTATTTCAATTTGCTCAATCTTATTGGATAATCACATCTTCTATGTATATATATGTCAAGACACAAATTTGCTGTGACTTATCAAAGTGGTGGAAGATAGTTACCAGAATTTCTAAGGGTTCACTTACCAGTGGGGCCTTAATGGTATTCTACACCAAAGAGATATTTATCATTGGGCATGGAATTGAAACAGCAAG…
>Peanut_newGene_2650	Peanut_newGene_2650.1
AATAATATTTACTTTGTACAAAACAGTGTAAATAAATAAATGAAAATATAGAAAAAGGGAACAGAAAGAAAAAGAAAGGAATTAATTAAATAAGTAGTAGTATACATTATTACACTAGGAAAGAAGATAAAGCAGATAGGTCATAAAACAATAATAAAAAAGGTGAGGCCTTTTCTGTTTCTCCATTGTAGAGCAGGAATCTGAGATCTAAGGGAAGAATTGAATTGAATAGGGACAATGAAGTTCTTGTTTCAGTGTCCCTGTTGCTCATGCTTTTGCTTCATGAAGCCAAAGAAGGGCCCTGCAAAAGTCAAGGAAGCCAAAGAGGTCAAAGAAACCAAGCAAGAAGAAAAGAAAGAAGAAAAGAAGGACTGAAAATTCACCATGTTATTGTAATCC…
>Peanut_newGene_2653	Peanut_newGene_2653.1
GTTGGAGCCGATCTCCTCACCTCAACACCAAGAAGTTTTTTATAGGCAAGCCGAGCTATGTTTGTACTGAACTAGCAAGAATGACTAATGGGCTTGGTACCTTGCAAAGGCTTCGGGTTGCCAAGAAAAATATAGCAGTTTGGATGGTATAGCTAAAGAAAATTGAGAAATCATGATATTTTTCTTCTCCTTATAAGTCAGACTCATCTTCATCTCAATTGGCCAAAGCCATTCCTCTTTCCTCCTCCAATTACATAGCCTCCTTCTAGGACCGTGCCCCCTATACCTCCTCTCACTGAACCGAATTCCCAAAAACGTAAAAGCCCATCTTTCGAGTTTGGTAGTGCTTACGACTAGGGTTTCGACGCCATTGATTTCTATGAGGAATATATTCTTCCT…
>Peanut_newGene_2654	Peanut_newGene_2654.7
CATAGGCAGCGAAGGTCCGTCAACTGCGCCGGCGTAACCGGTTGAAGATCTGGCGGTCCCACGAACCTGTAGGAGAGAGCCTGCCGAGTAGGTGTGGAGTCCATCTGAGAGTTGTTGCGACCACAGTTTCTGTTATCCAGGGTTTTTATTATCATAATATTGGTAGCAAGAAATGGAGAACAAGCGAATGTGGAGTGATGAAGAGACATTGGCCTTTGTTGGTTTCATGGAGGAGTTTGTCGTTGACGGTCAGCGGGCTGATTATGGGCAGTTTAAACCGGGAACATTCGAGAAACTGGCTTTGAAGATGTTGGAGGCTTTCCCCGGTTGTACACTGACCGCGAAGCATTGCAAGAATAAGCACAAGCGGCTGAAGGAGAAGTACCAGTACGCCGCTGA…
>Peanut_newGene_2660	Peanut_newGene_2660.1
CATCAAAAAAATAAACTCAAATAACGTTTGCAATCAAAATATAGTTTAGCTATTTATTACGATTTGCATCATTGTGCGAATTTTCACAAGGAAACCTTGCCAAATGAAAAAAGGGAAGAAAATGACACAGAAAGACACCACATCAAATGAGAAACAACAAGAAAAGTTACGTCCTGAAATCTCCAAGAGGGAGAAGAAAATGAAGACAAATAATAAAAGCGCTCTTGCAAAGAAAAAACCTCATTGGTCTTCAAAGTTTCCATCTCTCTGCCACTTCAGTGAAAGTAATAACAATGTTGAAGGTGAAACCAGCAATTTGCCTCCGAACACCGAGTCAAAAGATATATTGGATTCAAAGTGTGAAGGAGATGGAAAATTACAAAAAGACTGATAACTAGG…
>Peanut_newGene_2663	Peanut_newGene_2663.1
TGATGGGGTATAATAGCAATGAAGTGCTGTAATAAGGTAGTGATTGCCAAGAAGAGTTCACACAGCTGGCAAAGACTCGAAATTCATCCCAAAAAGACATCGGGTGGAGTGAGGGGCTCATTCGGTAGTCTTGGGCACCTCTTGATGCTGCAGGAACCTCTTCATCTATTTCTCAGCCAATTTGATTTCATTTCTTTGTTTCTATACACACAAAGGGGAGGTAACATTCTTTAATTTGTCTAGGTAGGGGGATCAAACACCAAAGAAATTTGTTATTATTATTCTTTCATTCTTTGTTGCAGATAACATTTCTTTCTTGTGCTTTCGTAAGAAGAATGAATATTCTCATAGAAAATTTTCAAGCACTAATGATACAGTATTGGGGAAAATGAAGAAAGA…
>Peanut_newGene_2664	Peanut_newGene_2664.6
AATGTATCATGTCTACAAGAAGATCATTTATACTTAAATCTCTTTTGACCACTTCATTCAAAATTCTTTTAAATCTTTCCTTGCCCTAATCACTGGTCTATTTTCCATTTAGCAGTTTTCTCTCCACATGCCCAAGCACCTAAGATGGATTCTTCAATCTTTTCAATAATAAGTGCTTCTCTGACTTTCTCTCTTATGTCTCTGTTTCTTATATTGTCCATTTGTGTATGACCACTCATCCATCTATGTTCATGCATTTTTATTTGGCCACACTAATCTTATGTTCATGCATCAATTGTTGCCCAACACTTCGTTCCATACAACGTTTAATGGCAGGGCGATAAACTTTATCCTTAAGGGTATTTTTTTGTCGCATATAAAGTCCAAAGTTTACTTTTC…
>Peanut_newGene_2670	Peanut_newGene_2670.2
AAAACAGAGAAGTTGGGTTGGTTCTCGTTGAAAACAAAAAAAGAGGGATTGGATTTTTAATCCCGTGACCCAATGAAGCCACCTTAGCTTAGATGGCACTTAGGAGTACGCGTGTAACTTGTTTCCTTCAACCTTCGTCCCCAATCTGCTCTGAAGAAGAGGCGTCACTATTCTTGATTAAGATTTACTCCACTTCTTAGGGTTTCTCAGACTCAAACACTCTTATAGATGCTACATAGTGGTTATTTGATACCTTTGTTTTAAGTTGGTATTGCATCAGCTTCACGATGTCTTGTATGAAATGCTTTGATCAATTTGAAGAACATGTTACTGGACTTTGCCTATTCCAATAAATGTGAAAACAGAAAAGGATCAAGGAATAACTGAATTTTGTTGCAT…
>Peanut_newGene_2672	Peanut_newGene_2672.1
GGCTTTATGAAATCAGGAAAAAACAGAGCACAATTAGAGGAGAAGTCTTACAAGGTATTGAAGAAGCTATGCGACGCGGTGATACTGAAGCATCATCAATTGGTACTCGAGTGATTTTGCCTTCTTCTTACATGTTTAATAATTGCCAAGATGCTATGGCTATTTGTAAGCATTTTGGGTATCCAGATCTATTTCTTACCCTTACTTGCAATCCTAACTGGCCTGAGTTTCAAAGATATACTAATCGTGATCAAGTTCCAATTGCTGATCGGCCAGACATTGCTTGCCGAGTCTTTCATGCTAAGATGAAGTGTCTTCTTAATGATCTTAAGAATGGTGTTTTTTTTGGTCCTCTTAATGCAGGTATGTATACAATTGAGTTTCAAAAAAGAGGTTTGC…
>Peanut_newGene_2674	Peanut_newGene_2674.1
AGAAGAAGAAGGAGAAGAAGGTGAAGGGAATGATAATGGTTTGGAATTTGAAAGCGTTATTAAAGAAAAAAGGTGGTAAGCACACGGTTATTCACAGCAGTAACTTCAATCTTCAAAACTCAAAAAATTGAAAAAAACTGAAAAACCCTAATCGCCGTTCCAGCATCCTCTCTCGTCTCTCCCCTACTGCCACTGTCACAGTCGCCGTCGTCGAACTACTCTCCGTCGCTCACTGTCGTCGATTTCTAACACAGCAACGGCCAACGACATTCCTCTCTCGTCTCTCCCCTGCTGCTGCCATCTAACGACTAACACAAGGAGATGAGGCGAAAGCTCAGAGAGCTCTAGAATGCCCTTGCATTGCTGACTTGCAATAGGCATGCAGCAATAGACCCTTAA…
>Peanut_newGene_2679	Peanut_newGene_2679.2
AGCTCATTTTAACCTAATATGAGGGAGAGCGGCGCTGAACTTGTGAAGAGAAGAAGGAAACTCCATTCCACTATTCATCTTCATCTTGTTTTGCTTGTAACTTGAGTTATGGAGCTCCGATTGACGAGTTTTCTCCTTTGCCAGAGTTTCCCGTCAATGTGCTTCCGTCGGAGTTTCCCGTCAATGGGAACAAAGAGTTTGAGATGGTGATTGCTGAATGTCTTCCGGAAGCAATGCAGAACCGGTGGGAGGCTGTGGCTGCTTGTCTCACTGGAAAGACCCGCATGCAGATACAGGAACGCGTCCAGAAGCTCATCTCCGACATTCAGTAATAAGCATTTCAAACTCTTTGTTCTCATCCTCACTCCAGACGGGCTCAGGCTGTGCCTGAGGTTGTTG…
>Peanut_newGene_2680	Peanut_newGene_2680.4
GCAGATTGATATAAGATTTATGGATGAGACTAATGTCAGTTATAAGCTTCTGGAAGCGTTCCTGTATTTGCATGGGGGTCTTTCCGGTGAGACAAGCAGCCACCGCTGGAGCTCCTGTTACTGTCAGCTCTGACACCATGGCCTTCGCTCTCCCTGCTGCTGCTGCGGTTGTTGCCCGTCGTGTATGGCTGTCGGAGAAGTTGTTACGGCCGCTAGAACCACGCCAGAGCTGCCGCTACTTGGTTCAGTCGTTCCTTTTCCGCCAGCGTTGATGGTGACTTGAGATGCGTCTCTGTCGCCGAAAAATGACGCGATGATTGGCGGAAATTATCACTGGAGCCGTTGCCATTCTATTCATTTGTTACTTTCTAAATGCATTGCGGTTATTGTTGTGGAAGC…
>Peanut_newGene_2685	Peanut_newGene_2685.1
CGCTCCGATTCCACTCGCTGCTTTCGTTTTCTTCTTCTTCTTCAATGGAGTTTCGTTCGGTTAAACGGATCCTTCTAACGTTAGCGGTTTCCGTCTTCTCCTTCGCGACACTCGTTACTGTTCTTCGCCTCGTCAACGGCTTTGGTTGTGGTGACTGTAATGGTGCCGTATCCGGAACCGGAACCGGAACTAGAACCGCCGTGTCGGTGTCTCTGAAAGTGGAGGAGGAAGGAGCCAACGTGCACCGCAAGCTTCTTAATCATCGTAGTAGTAATGTGGCAGGCACAGGCACTGGAGTGGTGGAACCTAACAGAATATGGGGTGACAACAAGTGCAGCAAATCAGATATAGTGATAAGCCAAGGTCCCACGGCCCCACTACCGAGTGGGATACCAACAT…
>Peanut_newGene_2690	Peanut_newGene_2690.1
GAAAGGGTTCCATCAAAGGGAAGGTCTTGACTATGGCGAGGATTTTAGTCCAGTTGCCAAACCCGCTACAGTGCGTGCAGTTCTAGCAGTGGCGTTGTCAAGGCAGTGGAAGAGGACGTCAGTTTGACTTCAACAACGCCTTTCTCAATGGCGATTTGTCTGAGAATGTATATATGTTACAGCCTGAAGGCTACAGCCTTGGTTCCAACCTTGTGTGTAAGCTTGAGAAGGCGTTGTATGGCCTGAAACAAGCTCTGCGTGCCTGATTTTTAAAATTGAAGACCACTTTGGAACAGTTTGGGTTCACCAGCACCACTTCCAACCCTTGTCTGCTTGTTAAACATAGCCCTCTCTCCACCATTTACCTCTTGGCATATGTCGATGACATTCTTGTCACTG…
>Peanut_newGene_2697	Peanut_newGene_2697.1
ATTGTCGACTGTTGTCTCAAACTGCTGCAACTTCATTGAATTGATGCGGTTTCTGGTGCGTAATTAAGCCCCGCTCCAATTGTTCTGACCTGAGATAGTTTTGGGCATTCACCGCATCAAATAACCCTGGGAAGAGGGGTTTTGTTTCCCTAAGATACCCAAAGAAAAATTTAGTAACCATAACACTTCAGTCTTTGGATCGAGAACCCCAGCAGCGCAAAGGTGAGTCAAGCACTGGTCTCCTCCTCTGCCGTCGTGGCTCTTCCCTCTGTCAATTCCAGCTTGCACATCCGCTTCATTGTTCTTTTCGGTCACCAGTCTCCTCCCTCAGCCGTGTAGCTCCCGTGCACGAAGGTAAAGTAGAAGGGGTCCGAGTCTTCTCCTTTCGTTTTCCATTTC…
>Peanut_newGene_2699	Peanut_newGene_2699.1
CACCAAGGTAATTTTTGCAGGTCGATCAACAAAAGCTAGAAGTTACAGTCTTATCATCTCACACCATTCCGTCATTCTGATTCATACATGTTTCAGCTGCAACATTGGTGAGAGAGGTATTGCACTAGCTGAGGCTGTATATGGTTCAGCACCTGATATTGCTGGAAAGAATTTGGCAAATCCAACTGCTTTACTGCTGAGTGGTGTTCAATGTTGCGCCATTTGAATCTCCATGACAAAGCTGACCTAATTCAAAATGCCATCCTCAACACAATTGCAGAAGGGAAGTACCAAACTGCTGATCTTGGAGGCAAAGCAAAGACAACCGAGTTCACCAATGCAATCATTGACCATCTCTAAATTCTGCTCAGAGTAGGAATACCTCAGCATAATGGAAAA…
>Peanut_newGene_2700	Peanut_newGene_2700.1
CACAAAACTCTAACCCCTTCTAACCTAACCTTCCACCGCCACACTCCCTTTCCCCAATACCCAGCAATACCCAACATAGCTTCAAAAGAAAAACCAAAAGAAAGAAAAAGAAAAGGGAAATGGAATTAGGAGAAAAGAGAGAAGAGAGTTGCGATGTAAATGAAGAAGACAAGGGGAAGAGGGGGCTGACCACACCACCAGCGCAGGAGAGAACCGAGGGGAGAGAGAGAGTGATGCGTCTGAGAAAGAGAGAGAGAGAACCGAAGGGAGCTGCTGCGCCGTCGCGAGGGAGTCGCCGTAAGCTTTGCGTCGAACTCCTCACGAACCGTCGTTGTCCGTGGAGCCGCTAGGAGCTGTCGGTCGCCGTCACCGATTGATGGAAGAAGAGGACGCACAAGA…
>Peanut_newGene_2703	Peanut_newGene_2703.1
CACCTTTTCACCCCTCCCCCAACGAAACAAAGAAAGAAAGAAACAAAAGAAAGGGAAGCCGTGAGAGGGAGGGAGAGCGTTGGAGAAGAGGAGCTCACCGCCGCTATGTTGCCCTGCTACTCTCGCCGCCGCCGCCATCCAGGGAGCTGCCACTGCTGGTCATCGTCGCTGAGCCCGTCAACCTCGTCGCTGAGCCCTGCCACTCCTTGCCGCTGCCAGCTGCGCTGTCGCAAAGGAGAGACGCGCGAGAGAGGAGAGGCTGATTCTGTAACCACCGCCGCGCTGTGCTCCACGTAGTCACCACCGCAGTTTCGTCAAGAGAGAAAGACGTGGGAGAGAGGAGGCAGAACCGCGCGGGAGCTCAGCCGCAAGTGAGGGGACGCGTGCCTGACCCGTCAC…
>Peanut_newGene_2704	Peanut_newGene_2704.1
AATTTATAATGTTTCTGCCTTTATCCTACTGCTATTTGGTTTCCTTGTGCCACCCTTACTCTAATTATAGAAATATGTTTCCATTTTAGCCACTGTCGATTTATCTATTGCAAAGTCATAATTGATAATGGAGCTGCTAAGATTGCTGCTACTGCCATGAACTGGGGATAAAAGGGGTTATTGAGTTAAATTCTGTGATTGAGACATTGAGCTTTACCTTTTCAGGAACCGGATGAAGAAGCGTTAAGAAGAGTTATACTGCGTTTGGTTGATATGTTGTTGTATTAATTAGATTATTTTATTCCCTCGTCTTTGTTATTACAAATTTGTAAGAGGGATAGGAATTGTATGTTTTATATGTATATTATATTATGAGTTATTATGTAAGGAGTCTTGTAT…
>Peanut_newGene_2705	Peanut_newGene_2705.1
ATTATTGTTGCAGGAATTCAAACAAAAGGATTATTGGTCTCCCATGAGCACTCTTTTTCCCAAGCCCAAATAGAACAAAGTTTAAAGGGATTGAAAATGAGGAATTCAAGGAGATTGATGATTGGATCAACAGCACCAACTTGCACTTACAATGAATGTAGAGGATGTAAGTATAAGTGCAGAGCTGAACAAGTACCTGTTGAAGGAAATGACCCAATTAATAGCCCATACCATTACAGATGTGTTTGTCATAGATGATATTATTAATTAATTATTAATTATTAATTAGTTAGTTAGCTTAATTTTGTGTTTTACCATGAGATATTATTGTAGCTA
>Peanut_newGene_2707	Peanut_newGene_2707.7
CTCGTTAACACAGAAAGCTCGCTACACAGAATACATGAAATGGGTATGAGGGGCTCAATTTATAGAGAGTTTCAGCTGTGTTCACTGCTTACTAGGGTGGAGGAGCTGTCCCCTGCATGCGGACAACCTCCAACATGCCCACCCCGTGTTACTGCAGCTTCTTGGGACGGCGCGGGAATCTCTGCAACGGCTGCTTGATTTGCAGGCAACACACCCACCGCGTGTTGCCAAGGAACTTCCACGCCCACCGCGTGTTGTCGGAAAACTGCCACGCCGTTGACAGACCCTGTCACCATGCCCCCCCGTGTATTGAACTTGGTACCCATACCTCCCTCCCTAATATTGAGCAAAAACACCGATGTGTATTTCATATATGAAAAATAATTTCTGTAAATTGCA…
>Peanut_newGene_2727	Peanut_newGene_2727.2
AAAAGGGAAACTGGGTTGAAGAGATGCGAGGTTCTCTAATGGTTGTAGCAACGGTTATTGCAACCCTAACTTTCCAAATTGCAATAAACCCCCCAGGGGGCGTTTGGCAACAGGACTCAAATAACCAACAGGGTTGTGCTTCTGGGAACACCTGCAAAGCTGGCACTTCTGTTTTGGCTACTTCCTCCGATGACGAAAACCAACGCTTGAAATACGAAATGTTCATACTCTTGTGCACTGTTTCTTTCACTGCATCACAGACTGTGATTCTTTTTCTGCTTACTGGTTTTCAGCTGCGTAATAGGCTGGTCATGTGGTTGTTGATTCTTGTTATGTGCCTCTCGGTTATTTGCTTGGCTGGGGCTTATGTGATCTCCATTTGGATGGTGATGAAGCCAC…
>Peanut_newGene_2732	Peanut_newGene_2732.1
CTTGCCATTTTGGTACTTTAAAGTTTAACCCCTTACCTTACCTCAACACGGTTTCTTTTCCGAACCGACGACTTGGAAGATTAAATAGAGAAGAAGGGTGTGAAGGGCATTGAATAAAATAATAGCAACAAGGCACGGGATGGATTGTGTGAAGATGTTGAAGAACAAAGGATACGGCAAAGTAGAAGAAGAGAATCAGAGTCACTACGTCGAAGATCAGCACAAACATTATTCCAAATCCCTAATCGCTACTCTCTCCACCGTCGCACTCTTCTTTCTCACTCTCCTCTTCGTTCTCGCCTTAGTCCGCCATGAGCCCGCCGACTCAGCCACCGAGTCCATCCGAGTCGCCTGCAACGTAACTCGTTATCCCAACTCCTGCTTCACCAGCTTAACCTC…
>Peanut_newGene_2733	Peanut_newGene_2733.1
CGCATCGCACAATTTCTCTGTCATCTCTTACGTCGCACGAGCTCCTTCCGCCGCCGCTCTCGTCGCGTCTGCTCCCTTCATCGCCGTCGTCACAGAGCTCTCTCCGCCACCGCTCTTGTTGCGTTTGCTCCCTTAGTGAATTTCAGGTTTATCAATTATTTTACTATCAGCAAAGAAGAGATTTTTTGTCGGTCATGTCTGCAACTATCCGTGAAAAACTCTGTCCAACTCGGTGGAAACTCGGTGGTTGTTGTTGAATGGTGAAGCTTGAAGCGAAGCTCGGAACGACAGTTGACTCCATTGGTAACTTCTTCTCTGGCAAAGACCAGCATCCCTGGTGTGACCCTGATATCGTCGCTGTCAAAATCGAAGTGGCAACCATTTAAGGAGTAGGGATCT…
>Peanut_newGene_2734	Peanut_newGene_2734.2
CTGGGGGTGACCGGACAGTTTCGTCCTAGAAAGCTGATTGCTGAAATAAAAAATGAGATTTCTAATATTGATGAATTCGACATCTCCATAGTCAAGGATGTCACAAGGCATTTCATTAACAAGTCAATGTTTTCACTTGGGATACATTCAGAGTTTGCTCTAACTTCCTCAACGTCCGCATCGTTTTCTGCAGAGGCTCATGGTGAGAAAGGACGTCGCCAGAAATTGATGGTTTATCACAAGCTTCCTGAACATGATCTTACATTTGAGGCAGCATGGCCTCAATTGTTTGTTGACCACAAAGGAAAATATTGGGACGTCCCTGAGTCTATATCTGCTGATCTATCATCCCTTGTGTCTGAGTCGGGAATACGATACCACATTGGGATACATAAAAAT…
>Peanut_newGene_2735	Peanut_newGene_2735.1
AAAAAAAAGAAAGAAAAAGTACTTTTGTTTTAAGCAAGCAATTCTAGGTATTCCAAATAGTTTAGATTCTACATCAACTAAGACAGATAACAGTTTCATTTTAGAGCTCTATACCTTATGGATTATAAATGTCTGGAAAATTTTGTACATGGAGTGGAGTTACTTGTGTAAGTTATTCAATGCATTTGAGTCTAATCTTGGAACAGTCTTAATGATACAGATTTTGTGCAGCAATGCCTAGTAATAAACGTTTGAAAGTTACAGCATCCACTACAGAGAAATCAAGCGTAGCTGTGCCACCATCGCGTAGCAGTGCCCAGCCTATTCCACCATCCTGCAGTGAATTTTGTCCAGTACTTCCAGCCCGGAAGGATCCTCATTCATCACTGCCAACTCCTG…
>Peanut_newGene_2738	Peanut_newGene_2738.1
TAATTTTTTAAAAATATCAAAAATTATACTCCAAAAAGCATTCTAGGAATTGCTCTGAGGGAACCTGTAGGCTGTAGGCTACATTTAAGGCAACTGTCTTAATATCTTTTTATTTGTTATTTTTTATAAAAGAAGGTGTATGAAGTTTAATTATAAATTTGGTGGTTGAAAGTGTCTCTTCACTTGGCTAACTTATCATGAAATGAAAAACGTATGAATCACAGTTGCTAACACACAATATAACGTTGCTCTATTTTATTTTCCTCTCTAGTAGCTCTTGCTTCAATTTCTTCAATTCATCGGTGACTCTGATCAATCAAAATAGACCTCTACATAATTTTTATTCACATATCATTCTTCCATGTTAGAGGAAGACTTTGACAACGATATCGATAGTGA…
>Peanut_newGene_2739	Peanut_newGene_2739.1
AAAAAACAGTGTCTCTCAGCTTCTCTTAACCAGTTAACCCTAAAGGCCTCCCCAGTTCCGCGATTCATCAACCATCGTCAACACTCATCAGCCAGCCACCACCAGCTGCAGTAGGCAGCAGCTCTTACCATCGCTGAACTCCTCTCCTCGGTCAGAGCTCACCGTCGCCGCCGGAATTGTGACTGACAGAGGGTGCCATCGCCGAACGTCTCTGCCACTCACCCTCTTCTCCTCGCCGTGGAATCTCTGCTCAGAGCTCTTCTCGTCGCCGTCGCGAACTGTTCCTGATCGGCTGTCGTCTCCTCGCCATAACGAGCTCTGTTCCCGGCGTCTCTCTCTTCAAGCTCTCTCTCTATCTCTACGAGGCCACTGTCAGCGCCGTGTTCCTCCGAGCTCACT…
>Peanut_newGene_2746	Peanut_newGene_2746.1
CTCACACACACAGAAGGAAAGAAAAGGGGAGAAACGAGAAACAGGGGGAGGTCGAGGGGGAAATGGAGAAGAAGAGGAAGGAGAAGCGAGGGAGGGGATGGCGCCGGGAAGGGTTCCACCGTTGTCGTTGTCATCGTCAGGTGAAGGTAGAGGGGTGACCGAGAGAGAGTCGGATGTGAGGAAGAGAACGACAGGCGTGAGAGGGAGACAGAGTCTGCGACGGAGCTGTCCCGCCACCAACGCCTCGTCGCCGTCGTGCTTCAACGTCACCGCTGCCGTCTGAGCCGCCGTCAGTTCTGTGTCGCTGAGGGAAGCCCGAGATTGAGATGAGGGAGATGCGAGCCAAGGACCGCGACGAGGAGTAGAAGAAGCCGTCACCTTCACTGGAGCCACGATCGC…
>Peanut_newGene_2754	Peanut_newGene_2754.1
CAAAAACATCAGATTAGAAACTTCTGTTCTTGCAACTATTTAATAGCGGGAACGTTAATATGAAAAATGTTTCTTCTCCTTTGATTAAAATTGAAACGATCAAATTTCAAATGATACTCAATCTCTCAAAATCTTTGCAAAAAACTCATGGAAATAAAGCTACGTTTCAAATCTTCACCAAAAAATACAAAAACAGAAAAACAGAAGACGGAAGATTATTGAAAGTATTGTTCATTAATTGTCCAATTTTTTCACATTTTTTTATTGCAAAACCCTAGTTTGTTGTATTTCTATTTATTTAATAGATTCATTTTGTGTTTTTATGTTGAAGTATATATTACTATTTTCATTATATTGTTTATTTGGTGATAAAATTTTTAGGTTGGTGTAAAAATGTTA…
>Peanut_newGene_2759	Peanut_newGene_2759.1
TAACCCTAATTTCTTATCCCAGCCACCAAACCACCTCCAACGAAATACATGCTTCAGAAACAGAACATCAGAGAGGGAGAGTGAGGAGTTAGGGGTGAACCAGGGGAAGGGAAATCGGAGAAGAGGGAGCCGCGCCTAACCACCGTCCGCTCTGCCGCGCCTCTCGTCACCATCAGGTCCGTCGTCGCCGTTCGTGGAGCCATGAGGAGCACCGCCGTCGAAGCCACGCCAATCGTCACTGCCCAGTCGTCGCTCTGCCTCCCACCAAGCCCGTTCCGCCGCTAACGTCGCCGAAGGGAGAGCGACCACCACGAGGAGCCACCGCCGTCCTCTCTCGTCGTCTTCCTTGGAGCCGTCACCGTCGAGGGGCCAGCAGAGGGAGAGAAAACGAATGCGAGA…
>Peanut_newGene_2776	Peanut_newGene_2776.2
GGGGAAAGAGGGAAGGCAGGGGAAAAACGGAGGTGAAGAGAGGGAGGAGGAAGGAGCGACGCGGCCAAGACCTCACTGCTGCCGCTGTTGTGCTGCACGTGAGAGTGAGAGAGAGACACACACAGGACGAGCATCGCGAGAATCAAGGGAGGGAGACACGGTTCCGTCCTGTTGCCGTTGTGGGTTGCGCCTGATCACCATCGCAGAAGCTCCATCGTCGCTGTTGCACATAAGAAGAGAAGATGACTTCGCTGATTTTGATTCTGCCTAAGTCCGCATCGTTGCTGGAATCGCGAACCGGGGAGGAGAGGGAGGCTGCTTCCATCGTCATTTTAGGTGTTAGAAAAGACCGTCGCCATTGAAGGATCCACCGCCGCCGAATCCCAGCTATCATCGCCG…
>Peanut_newGene_2779	Peanut_newGene_2779.1
GAAGCCGATCCCTCTGCTACCCTTCTAATTCCAATTCTTCCTCTCCTCTCCTTACCTTTTTCACCCTAAATTCCGATTTTCTCCACTTCTTCCCCGCCAAATTTCTCCCCTTTTTAAACCTCCCTTTTCAAATCCCTCCTCCTCTTCTTCTTCCTCCTTCCATTGCAAAACCCATGTTCTTTATCTGATCCGTTTCCTAGTTCTCCGAATCCTTCTTGTAGTGCCTTTCTCAACATTCTTCACTTCGTGTTCGTGTTTCTGGAAAAAGGTGAAAGCTTTCAGTATCTACAGGATCTTGCAGGCAGTGTCTCGGCCCTTGTTATACTTTGTGCAGTAATCATTGATATCGTTAATGACTAATCGAGATTTGATGCTTGGTCAAAATCATAACTTAGCAAT…
>Peanut_newGene_2782	Peanut_newGene_2782.1
ATTGAAGAAATAAATAATTTTTTATTAGTTTTATCTACTTGATTGTCTCTGCTCTCTATTTGCTCTATTTTATTGTGTTGTATTTTTTTTTTCTGTGAAAAGTAAATAAATAAACACAGAAAAGATTCAAACTGGTCCACATTTTGAAGGGGGATTAAAATGATGGATCCCAACATGCTCTTAAAAGAAGAATCAATGGACTTTGCATTTATCTTTGTTCACATTAAAGTGAAAGAGAGTGATATATATAACTGATAAGGCTATAGGCTTAGAGCACTGTGCTTTTATTCTTATGATGAAATTGTAACTAAGCGTCACTCCTTTGCATTTAGTATGTCAATCTGGTGACAGTGAAGAAAACATCACAGTTTTATTTGACTTGCTTGTAACCTGTCCAGA…
>Peanut_newGene_2789	Peanut_newGene_2789.1
CAAAAACTAAACTAAGCTGAAGAAAGAGAAACCCTAGCTCGAGCCTCCATTCCCCTTTCCCTGTTTCCCATACCCATTCCCTTTTGGCCGTGAGAGAGTACCTGAGAGCTGAGAGCCTGAGAGTCTGAGAGAGTGTGAGAGAGTGTGAGAGAGTGAGAGAGACCCGTTCAGCCAGCGCCACCTCACTCGGCTCACCGTGCTCGCAGGAGGCAACCGCACCGCCCGCCACAGCCAGCGCCACCTCCATCGAAGATTCGAACGTCGTCGTTTCCTGTGTCCGTCGCCTCCTGCTACTGCTACTGCTCGTCGCCTCCTGCTATTGCTACTGCTCGTCACCTCCGGTCTCCCTCTTCTCTGCCGGCAGTGCATCAGCCAGAGCCAGACATGCTGATATTCCAT…
>Peanut_newGene_2790	Peanut_newGene_2790.6
CAGATCTGTTAGCTATCTCATCGGCGTAGCATTGTGCGCGGTTTGAATCTGCGGTAGCAACACGAGCATCCTGTCACCGTCACCTTCACCATGCCGGTTGTTTTTACATTTTTACAAGAGGAGAAGTGCCCCACCCATAGCAAAAGGGATCTTCTATCCCATATCTGCTCACTGCTCGTGCCTCTTTCCTTCTGATTTGCACCTTCACTTCGGGTTTTCTCTTTATGATTTTTTTTGTTCTGATTTTTTGCGCATTCTAAATTCGGGTTCTGATTTTGTTCTTTGGTTTTTCTACTAATCAAATTGATTGTTCTTCTCTATCGAAGAAGAAGAGAAAGCTCAATAGAAAATCTATTTAGTATATTCCATTCAATATCTAAACCAAGTTGTAAATTGTAG…
>Peanut_newGene_2792	Peanut_newGene_2792.1
CGAACCCGCCTGCACCGTGCCCTTGCCCGCTCCGCCAAGCTTGGGGGAGCTTAGACGCTCTGATTGGTCGGTTAAGGGCGGCGTTTGAAGAGAATGGCGGCAAGCCGGAGGCTAACCCTTTCGGCGCTCGCGCCGTTAGGCTTTACCTTCGCGAGGTTCGTGATTCTCAGGCTAAAGCCAGAGGTATTAGCTATGAGAAGAAGAAGCGCAAGAGGCCGCCACACCAACAACAACCGCAACCGCAACCGCAACCGCAACCGCTCCCGCAACCGCAACCACCTTCCACCAATACTAGTATGAACTTGTGATTTGAGAATGGGGTTAGAGCGATGAAGCATGGGGAGACTATCTACTACAGGCTTTGGAAGTTGATTAAAAAGGTGCAAACCTAAACAGCAG…
>Peanut_newGene_2799	Peanut_newGene_2799.1
GGATGATGGCGAAACCACTGAGCTCAGAAAAGAGGACGGCGGGTCGGCTGCGACACTGAGAAGACGAAGGCGACGGTGCTTGAGACAGAGAGATGACGGAGCTTGAGGTGCGGTGAAACGCGAACGGCGGAGCTCCAGACATTGCAGATGGCAGAGCAGGAGCTTGAGGTGTTTTGAATGGTGGACGCTGTGTGAAACTTGAATGTGTGGGAGAATACAAAAGTGATGAGTGATGAGTGCTGGATGATGAGAGTGATTGAGTGAATACATGCTTGATGCATACATTCATATTAAAAATAACAATTGGAAAAAACCCTACGGGCAAGGCCAAGGCCAAGGGCGGCTTTGGCCAAGTGTAGATCTAGTCAAGGGGAATGAAAGTGAGGTTAATGTATCTGC…
>Peanut_newGene_2807	Peanut_newGene_2807.2
GGAACAAGGAAATCAAGATGATGCCATTTGGAGCTGGGAGGAGGATCTGCCCTGGCTTTAATCTAGCAATGCTCCATTTGGAGTACTTTGTGGCCAATTTGGTTTGGAATTTCGACTGGAAGGTGCCCGATGGAGAAACCGTTGATTTGTCTGAAAAGCAGGAGTTTACTATTGTCATGAAGAATCCATTGCATGCTCATATTACTCCTAGGATCTGAATGGAGGACCCTTAATAAAGCTTCCTACACCCTTTTCCCAAACAAGAGTATGTGCTGCAACATTAGAAGTAATGGAATAATGGTGCAAGGACTTTCTGGCATGGATACGTTTTTATCTGTTAATATAAACATATCGTTTCTGTAATTTATGAATCATAGTGGCATGTTTAGATAGATTGAC…
>Peanut_newGene_2809	Peanut_newGene_2809.1
GCACACTGCCGCCGTCCGTCGCACTCAAAGTTCGCCATCCGTCATCTAGCTTCCATCGTGCTCCGATTCTTCAACCCCTGTTCTCTGTCACCGATCGCGGCTGCTTCCTCGAGCTCGGCGTCCGTCGTCTTTGTCTGCTCAGCCGCGCTTCCGTCGCCGTTTGTTTGCCGTTCACGTTCGCGTCTTCGTTCAGCTGTCGTCTTCGTTCGTGTTCTTCGCCGTTCACGTTCACTCGGCGTTCACCGTTCGCGTTCACTCGCTGTTCACCGTTCGAGTTCGCGTTCGTCTGGAAGCCACGTTGCTCTGCTTCAAACTCTGCGACCAAACCGGGCGCTCCACCCAGCCGTCGAACTGCTCTCTTTTGTCGCCGCCACCGATTGGACCAGTAAACCAATGAAC…
>Peanut_newGene_2813	Peanut_newGene_2813.2
GTTGGTAGGTTGGATTGAATAAGTATTAATAAACTGAGCATATCATTTATGTTGTAGAGCATAATTTGTCTACGTCTTTTGTTTAGGTATTGTATTTTCAGTGGCTGAAACACGGTCAACTGGATAACGGTCATGAGTTGGAGCCATGGCTCATTGCATGGACTGCTGAAAAGCTCGAAAAAAAGGCAACATATATCCTTTTTGAGGGGTGCCTCGAAAAAAAGAGGAAGAAAGCAAAGACCTAAAAGGACAATCACCTCAGGCTGCAAGAAAAAAAAAACTTCCAAAAAAACATAGCCGAAGCATAAAGAAAAAGCTTCAGTTGCTCCAAGGGTAAGTATGTATTTTAGTGTAAATGTGTTAAGAGTATGATGCCATCTTGTTATGCATGATTTATAG…
>Peanut_newGene_2819	Peanut_newGene_2819.4
CTCGTTCCTCTCTTCATTTCTCAGAACACCCCATCCTTCGCGGGCTCCTCATCCATCCCCTCCAAATCCTTCATCGGCGGCACCTCTCTCCGTTGCACCGCCGTTGCCTGAAGCTCCATCACACCCCTTTTCTAATCTCTCCGTCACACCCGGTCACCAGTCTCTCTCTTTCATCTTCGACGCCGATTAATTTTGCCACCCTCTCGACACTGTTTTCCGTCGCTGCTCGTTGAAGCTCGTCAGCGTCGTCGCCGCTTCTACCTTTTCTTCTCGTCACCGTTGGTTCAGACACAGAGATGGCAAGCTTTCTGTGAAGGAACTCCAATTTGTTGAGCATTGAATTGAATCAGATTGGGTATATTTTGGAATGGACTTTGTTGAATATGCATTCTACTTGCT…
>Peanut_newGene_2821	Peanut_newGene_2821.1
TTCATCTTTGACCGCCGTTGGACGAAGAAGAAATCGATTATGAAGAAAAGCAGAGGAGTGGTTGCTCTTCAAATTATCCAAGAGAATTACTATTCAAGCAAAAGCAAATTGAGGGATCTCCTTGACAGCTCGAATAGCGTGCTTAGCTTTGGGAGTAAGTTTGTCTTTTCTGGTTTGATTTTTAGAAGAATGTCAATTACTTGAAGGAATTATGTTACCATTGTTGCTTGTTTTTGTTGTTCGTTATAAATTTTTATTTTTAAAACAAAAGAAATATAGGGCAGCTTTATAATTAAACAAGTTAGCAGTTTCCTCCATTTTCTTTCTTTCTTTCTTGATAATAATATATGTAAGGTTATCAAAGCAAAATTTGACATCACCCTGCAGTGTTTCTACTTT…
>Peanut_newGene_2825	Peanut_newGene_2825.1
CGCTTGTTTTTCTCTCTCTTTTATTCTATCATTATTCTATCATTGATGAAAATTCTTCTTGTTTCTTATTTCAATCTTTCTCATAGATATGTTGGTGACACCATGAGGATTGGAAGGGACAACAAGGGATTATATCTTTGTGCTGGAAAAAATTGAAGATAGAAGTCGTAATCCTCAAGGTTAAGTAGTATTTTATTTACGATAAATGTTGGGGTGACAATTTTTAAAAACTCATACTTTGACTCATCACTACATCATCATAAGATAGAGTGTGGAACTTGCTTTGATGGTGGATTCACTCTTCATCCATCCTTTAGTGAATGAATAAGGAGTTAAAGATGAGTTTAAAAAGGTTATGTCGTCTTAACATAACTCGATAGGTTTGAGTTAGACATGTAT…
>Peanut_newGene_2831	Peanut_newGene_2831.1
GTAATAAAGAATAAAGAACCTTTTATACATTATACATATATTGTGCCTCCTCACCTCTTCTTTCTAAGTTTTTACCACACTTTCCTCATTTCCTCTCTCTCTCTCTCCCTTCTCTCTAACAAAGCCCAATTAGCACCGTCGATCGAGAATGGAATCAATGGTGCAGGTGGCCAAGGGTGAAACGGCGCCGTTTTGGACTGAGGAGAGGCACGTGCACTTCCTCAACACCATGGAAGCCTCCTTCGTCCGCACAATGCTCCACCGCAACGGAGGGGACTACTACTCCGGTAGATGGCAGCTACTCCGGCTGGACCGCCACCTCCCGGACTCGTCGGAATCCACCTTGGACTCGGAAGAAAGCCGCAACAGCAAGATGAAGAAGAAGCATGAAGCCTCACC…
>Peanut_newGene_2845	Peanut_newGene_2845.2
GCGGGATTCTTGTTCAGCCCCATGCTTTCAAGTGCCCTCACATGTAACCATCTTAGGCTTGCCTATGCATGTTTTATAACAGCATGATGAACGTGGTAATGCTGGGCAGGTTGGTCGAAATGCTGATCGTAGGGAAGCTGGTGGAAAAGTCTCTTCTCAGAACAGAGAGTATAATGAAAAGGTGGAGACAGGTCATAGTAGAGAGCCAAGAGATGAGAAATCACATACTAAATTGGATGACAGTTTCCAGCGACGGGGTGGTTTTTCTGAGAGGAAAGATGAGCAACCTACTACTACGAGGAGAAGGCCAGCATTTAGGGAGAAGAAGATTCCAGTGGATTCAGGAGAAGTTAATCCAGCAACAAGGATGGTGGTAAAGGCTGTCCATACTGACCAGTC…
>Peanut_newGene_2849	Peanut_newGene_2849.1
GTTGATTTGAAACATAGTTAACAAGTTGCTTACCCACCAAGAAAACTTAGTAAAAGTACTTTATACACTGCTCTCTGCAATCATTTATAATAACTTGCTTCAAGCTTCATAATACATCATGGCCGGATCATCCTCCAAAACCCCTCGTTTCTTATTGAAACGTAAAACCAAATCCATTGACTCAGATTCAGCTAAAGCCAAGCGAAGTCTATTCACCACTCCTGAACCTGACATAGAGGATTATGGCCATTTCTTTGCTTCAAAGAATAAGAAGGTAGCTGACACGTTTCTGGAGAAGTATAGGAGCAAGAGGGGCTTGTTTGTCACCGATGTTAGCAAGACAGAATGGTGCCAAAAGCAAATGGAGTTTTCTCTCTTCTTTGATGATGAGGAATGCAA…
>Peanut_newGene_2852	Peanut_newGene_2852.1
TAAAATTAAAATCAAATCATCAAATTATTTCCCAAAAAAAATCAAAATCAATTATTCGGCTATGCTTGCTCTTGGTTTTTCAGCATCAAAGTTGCCCCAAAAATGATGAACAAATCCTAATCCAGGCAAAAGGTCTCGAAATCAGTCCGCTCGCCCTTCCTTGTTCCCTAGCCCTGTTTCCGCTGCGTGCTCTCGCGCCGTTGCGCCATCTGTGGTGTTTCAAAGGTTTGTGTCATCCCTGCTGCGCCAAATGATGGTTTACGAAGCATTGGACTGAAAATGGTTAAACCTGACCTCAATAATCGGCTTGCTGCTCGATTGGGGTCCATTGACGAGGCTTTACGTGGTTCCATTACAAAGCACCATCTCCAAAACAATCTCTTCTCCGCCGTGGCGCCG…
>Peanut_newGene_2854	Peanut_newGene_2854.1
AAAATTTTGAAGTTTGGCTATAAATTGATATTTGTTCTCTATTCAACAAACTTTCTCTTTTTATAAACAAGGTTAAAAAAAAAATTATGTTTAATTATTCTTAATATTTTAAGTATTAAAAATAAAAAATTGATATTTGTAATGTATCAAATTATTAATCCGAAAGATTATCGAAGACGCCATGCCGCCATAACCCCTTTTCTTTTTGAAAAATCCCTCCTTTTTTGGACTCAATAACTTCTTCGATACACCATTCATCATTTTCTGAGCTATTTTGCTTGATCATTGCGTTCCTTCTCTTTATTCATCTCACAAAGGGGAAAACCAAAATGGTAATAGAAGATTCTATAAGATTCTGCGTATTCGAGTCTCTGAATACAACAATGGTTGATGAAGGTG…
>Peanut_newGene_2863	Peanut_newGene_2863.1
GAGAAAGCACACGCTTTTTCTCATGTTGTCCATCTTCTTCTTTTGTTCTTCAACAAATAAAAAATCTCTTAGCTATTTCTGTAACGTGTGGTCAATGTGTGAAAAGTATATGAATATGTTATGTGATATATCTAGATTAGGAATTATACAATTCATCTGAACCAAAAAAAAAAAAGGAGTATCTTGTGTCCCACTTTTTTCGCTAGGGTTCTTAATGTCTCCTACTTGTGATAGGAGATTCTTCTTGTGATCTTCAGCTCCGGATTCTGCGGTTGGTTGCAAAAAGCTCATTTCTTTGCTTCTGGGTTGGTGCTGTTCATTGCAGATAAAGATGGGTGAGATTGGAAAAAAAAACTTGCATGGATGTGGATTATGCTGTTTAGTTGCATATGGCTATGT…
>Peanut_newGene_2864	Peanut_newGene_2864.1
GATCAAGACATTTGAGTGATTTTTCTATTTTTGGGATTGTTGATGATCTCTATGACAGCCTTTGAATCACACTCCACTTTAACTTTTCTCAAATCCCATCAGTAAGAAGGGGGTGCCATCTAATAAGTTGTTCTTCTTTGAGTCTTCTGTAAATTCATCTTTGTTCATTGTTGTATGCTTTCCTAATCTCTTCTACTTCCTATAGAATCTTCAGAATCGTGGACCTCCCAGTTTCTCCAACTCCAGATCTTCTAGACGGCGATAATGAAGATCTCTTTCCCCTTGAGGTTAGGGTTTATATTCAATTGGTTGAATAAGTTAAATTTGGTCGAATTTTCAAAATTGAGGGCAAAAAATTTAGGTACTTCTTTTGAGTTTAACAAATTCACCCAAATCTGT…
>Peanut_newGene_2866	Peanut_newGene_2866.2
TGTGTGTATGTGCTTGTTTATTTGTTTTGTGTGTGTTTGTTTATCTTCCATATGGTGCTTGAAGGTTGTGAATGAAACCAGCTGCAAAAGCTGTAGATGATTTGTCATTTGTAGTTAACCATGGAACCGAGGGCTCTGTATTCACTTTTTTATGGCTAAGTTGCTACATAAAAATTGATTTCCTTTTTTGTTGTCATTTTGCAAGTTGTTTATTTTTTGCTGTAGTATTGGATTTGGGATGAGAAATTATGTATCCTGCCCAATGATGGAACACATTTTATAATGAGCGGTTGCACTGATTTGTTCATAACTGGATGTGCACCACCATCTTCACCATCATCATCACCATCAATCTCAGTCTCAGTCTCAGTCTCATCACAACCTTCTACTCTCTTTCTC…
>Peanut_newGene_2869	Peanut_newGene_2869.1
AAAAAAAGACATGGTGCTACTGCAGAGAAACATGAAACTCCGAAAACAACCACCTTTGTCACTGTCCCTTGTCACCTTCATATCTATCACTATCTTCACCACTGCCACCACCATCATCTCACCGGGAACAACTCTCTATGCTTCAAACACCAACCAATCGTGGCCTTCTCCCAACAACACCTTTTCCCTACGCTTCTACCCTCTCCAAACCACCCCATCTTCCTTCATCGCCGCCGTTGTACACTCCGGCGGCGCCCCCATTATCTGGTCCGCCGGAAATTCTGCGGCCGTGGACTTTGGCGGCTACCTCCGCCTCCTTCCAGCTGGAAACCTTCGCTTGGTTAATGGCTCCGGCGCTACCTTGTGGGACTCCAACACCAGCAACATAGGTGTCACCTC…
>Peanut_newGene_2873	Peanut_newGene_2873.1
CTGGCACGTTCTCCTACCATTCTCACTCCCGCAAGATTACACCTGCATTCATGGCGATTGATGCTGGCATTGCTGTAACTAATAACAAAGAGAAACCTGATTTAGGAGAACATCCGAATCTACCTAAGAGAAAGAAGTCTATTGTGTGGGAATATTTCACTGTTGAAACTGTTGGAGCTGGATGTACCAGGGCATATTGCAAACAGTGCAACAAATCCTTTTCTTATATAAATGATTCAAAACTAGCCGGCACAAGTCATCTGAAAAGGCACATTACTTTAGGAATTTGTCAAGTTATTCGGCAGAAAAATCAACAAGGAGAAACTCAAGATACTCCCAATCCACCCAAGAAACGGCCAAGAGCAACACCTGGATATGCTGGTAATGGTGTCACATTTG…
>Peanut_newGene_2877	Peanut_newGene_2877.1
CTTTAATTAATAAAATCATTATTTTATTACTTTTCTACCTTTAAAGTTTGGAATATTATTTCTTTAATTGACATCCACATTATGAATGGCCATACCACTGAATCTGGTTCAGTTCAATCTAACCATTTTTGCTTTATCTCTAATTTTGTTTATTTTATTTATTCTATATAGGAGAGGTTGGCGAAGGAGAATGTTTTGCTTTCAAACACTGTCAGGAAGCTTAGCAAAGATGTCTATAAGATACGAAAGGAGCTGAGTAACTTCCGGTGAAGTATGGACGGCTAAGCAAAGATGGGGAATTCGGAAATAACAATGTTGTTACTGAGGTAACAGTGAGACCATTTGTTAAACATATTGTGAAGATTTCAGTTACTAAGGTGGGTCACAAATATGATGAGA…
>Peanut_newGene_2880	Peanut_newGene_2880.2
CTCTCTATCCGTGCTACTTCCTCGTTCTCCCCTGCACCGTGTTTGTTTTCTGATCCTCGACGCCGCAACACGTTTCTGCCGCCGCCGCTACACTTGGGGAGATGGGAGGCCATTTTGTGTAATTTCTGAAGTCCCTGGTTCCAGTGATGAAGATTATTTTGAAGAAGTTTACAATGTGACCATTTTACTATTGTGCAAATGGAGATGTGTGGCATCTTTCAGATGGAGCTTATGAAACAACTACTCTTCTCAAGGATGTTGGAAGTTTCACGAATCAAATATATCTTTTTCCTCTTTAACCATTGTTTTCTTTTAAGTTTGTCCCTCCTATCATAGTAAGATGATAAACACTGGCACAGTTAAGATGACTGTTGTATCCAACTTTGATTCCCGCTTAAG…
>Peanut_newGene_2882	Peanut_newGene_2882.1
GGGACTTCAGTAACTCTGCTATTTCTGCTTTTAGGTCTAATCTTATCTGAAAAGCAATGTCGCCCAGACATAGAGTGAACAAATGGGTTATCCTCAACTCGTACTATATTATGTGTATTATCATCATTCAACTAAAACAATTAGTTGCTAATGGTCATTCAAAGAACAGGAATTAGTGCAATCTAACTGATTAGAAAAGGGAAGATTAGGTGAAAGTATGCAAACACGTTTTGAGTACTTTAATTCCTTTCAGGAAACTCTAAGGGGGCAAATTGAATCTGGCGTCGTATCTAAAGGAAGTTGTTACTTTACTTTTGCTGAATTGAAGTCTTGCTATAACTCGACAAAGAAAGGTCCATTATCGGGTATTTGATTATATATAGGCTTAGGAACACTTTC…
>Peanut_newGene_2883	Peanut_newGene_2883.2
GGTCGTTTAGTTGTCTTCTTGGTTGTTCAAGCTGAAACCTTTGCCAAATGAGTGAGAATAAACTACACTAGGAGGAGTTTGCAAGCTGTCCCTAGTATTTATTATTCGCCTACTCGTCAATTCAAGACATTTCTAGTGATGATGGTAGTGATGATGGTGGGTACGGGTTCCGTGTCAAGAAGTGCTGGTTCCCTTGTAGATATGATGCGAGAGAAAGATGATGATGGCCGGTTTGCAAGTGGAGAGCGGAATAGTGAGGATGGAAGGCTTAGCTGTGGGTATTAAGATGGAGGACTTTTACGATATTAAAACATTGAAAATTGGTGGTAATTCAATATGCTTACTTGGAATATTTGATGGTCATGGTGGTTCTCCTGCTGCAGAGTATTTGAAAAAGCA…
>Peanut_newGene_2885	Peanut_newGene_2885.2
GCCATGTGAGGTGCAAGATATAGATTAAAGAGTGAGATTTTGTCGGAACTGAAGCAGATTTTGGATTGTGAGAATAGAGTAAAGAGTGAGGATTATGTGTTGGATTTTTTTATTTCGGTGATGTCGTCATCAGAGTTGTTATCTATTCCTAATTTGTTGGATCTTGAAGGTAATAGGGAGGCGATTGAGGAGTATTTAGGTAATTTGTATATGTGTGTTTTATGTTGTAGCTGCTGAGTGTTTTGGTGAGAGGTTGAATTGATGTGTTTGGTTTGTTGTTGGAAGAGATAAAGCTCCCACCCTAACGAATTTGAAAGCTTTTGTGAATAAAGTCAAGAAGAATGAAAAAGAGGATTCTTCTACTAATGTGATCAAAGATAGTGAAGCAGATGGTGCTCA…
>Peanut_newGene_2896	Peanut_newGene_2896.1
TTTAAAGATTGTGTGGGAGCAGTTGACAGTATACATGTACCTGTGACAGTTGGTGTGGATGAGCAAGGACCTTTCCGTAATAAGAACGGTTTACTTTCACAGAATATTTTGGCAGCATGCTCATTTGACCTCAAATTCTGTTATGTTTTGGCTGGCTGGGAAGGATCCGCCACAGATTTACAGGTTTTTAACTCTGCAATCACCAGGCAGAATAGATTGCAGGTTCCTGAAGGTAAATACTACCTTGTAGATAGCAAGTTTCCAAATGTGCCAGGTTTCATTGCTCCATATTCCAATACTCCATATCACTCCAAGGAATTCCCAAGTGGTTACACCCCGCAGCATGCAGGTGAACTGTTCAATCAACGGCACTCGTTATTGCACAGTATCTCCGATCGA…
>Peanut_newGene_2897	Peanut_newGene_2897.1
AGGTAGTTCAACAGATGAAGATGATCTCATTATTAACGTGAACACAAAGAAAAATAAATCATCCATAATAGGGAGTGATGAACTTCAAATGATCTTGGAAAATAAGGACTCATGGTCCAATAAATAAAAAATTGGTAAGGAAGAAAATGACAAGAGTGAGTCTCATGTGCATAAAGGGCATAAGAGCAATCTTAACAATAAGAGAAAATCACTTCGCAAATCAGAAAGGGAAAGCATTGGACATGTAATGAGCGGATAATTTATACGCTTTTTGGCATTGTTTTTAGTATGTTTTAGTTAGTTTTTTATTAGTTTTTAGTTAAAATTCGCTTTTTTGGACTTTACTATGAGTTTGTGTGATTTTCTGTGATTTCAGGTATTTTCTGGCTGAAATTGAGG…
>Peanut_newGene_2898	Peanut_newGene_2898.2
CTTGACGTCCTACCGCTCGTGTCATCGTCGCCAGCTTCGTCGGATCCTTGCCGCCGAACCCGTTCTTACCGCCGCTGCTGGAATCACGAACAGGGGAAGGAAAAGACGCGGGCCAGTGCCGCGAAGAGGAGCGCGACCCGCTACGCAACACTGCGCCGCCGTGTGTTTTTGCCGTCGCCGAGCTCCCGTGGTTGCCGCCGGCAAGGTTCAAAGAGAGAGAAGCTAGAGGAGAGAGAAAGATCGACGAAGGGGGTTTTGTTCGAGCGGCCGTGCCTCCACCGCCTTTCACCGCCGCAGATTCGCCACCATCCACCGCGCCGCACCATGCCACGTTGCCGCTGTTCTTTACTGCGCAGCCACCGCCACGCCTTGTCGTCGCCAGAGTTGCCACCGCCGCTT…
>Peanut_newGene_2909	Peanut_newGene_2909.1
TCTGCCTACGAAACCCTACCAGTTGACTGCTGAATTCAATGAAGAAATGTTGCTGGATCTACTGCGTTTGTGCATTGTTGCTGATTTGGTGCTATGTTTCAAGTCATTATTTTTGTTCATTATGAAGGAATGCTGCTATGCTATTTTGAGCTGTTTTGTTTTGCTTAATGCTATCTGCATCATATGGAATTACTGCTCGCTGCATCTGTTTGAATTCCTCTAAATTCATTTGACTTGTTGTTTACTGCTGTTTTAATCCGGGAACGTTCAAATTACTGCCGGAATGCTGTCAAAATTTTCTAAAATCTTTATGCTATTAACTTCCAATTGTGAACTGAATTTGGCACGTTTGACCTTATTCCTACTTGATTACTGCCAAATTCAATTCATGAATTGGTC…
>Peanut_newGene_2918	Peanut_newGene_2918.1
TCTTGAAATCCAACACGGGCCCGTACACTATCCCGGGCCTACCTCACAAGATCACCTTCCCCGTGAAGCCCATGGCGACTTTCAACAAAGTCATCATGTTCACGTGGAGCCAAGCCACCGCGAGACGCTTCAAGATCCCGAGGCTCACCTTCAACCCTCTGTTGATCTTTGACATGTGCGTGGTAGAAGCCATTAGAGCTCATCCCGAGATCTTGAAATCCAACACGGGCCCGTACACTATCCCGGGCCTACCTCACAAGATCACCTTCCCCGTGAAGCCCATGGCGACTTTCAACAAAGTCATGGAGCCCACCATTGACGCAGAGAAGGAGAGCCTCGGAGTCATCGTGAACAGCTTCAAGGAGCTTGACGCAGAGTACGCCGAGCACTACGAGAAGA…
>Peanut_newGene_2932	Peanut_newGene_2932.1
CTAGAACCCTAACTAACCACAATTTCTCCAGAAATGGTGTTTCACCATTGCAGAAAACTCTTGCCAGAAATCTGAGTCCCTCTGCCACGTGGAGCAGAATTGTTCTTCAAACTGTGATGATTGCCTCAAAATCTGCATCACCAACCCCAATACTACTATTATTCCCAACCACCGCCACTGCCACCGCCATCGCCACCGATTCCTCCTCTCCCCATAGACGATACATCAGACCATGGAAAAAGCCACGCGCTCTCGCCCTACTTGGTCCTTGCTCTCTTTGTTATCGGAGCTGCTTTCTTCGTTGTTATTTGCTATGCAATCTTTGCGAGGATCTTCAGAAGGAGGAGAAGATCCTTATCGCCACCGTTGAATCTTCGAACACAGGATAATTCGCGTGAT…
>Peanut_newGene_2934	Peanut_newGene_2934.3
ATCTATTTGTGACATTTTACAAAACTCCCAAAAATAAAAATCTCAGTATTTTAAAAGCTTAAACAAACACTCAAAGCCCATAGTCACCAAAAACCACTTAAAGCCCATACTGAAGATGCAAACAGCGGTTAGCTTCGAGTGAGATGGATCGAAACCCTAAATTACAGCCGTCGCCGTCGCCGTCGTCGTGCCGTCGCTACCGCCACTGCCATCGCCACCGCTACAGCCATTCATCTCCTTGATGCAAGCACCAATGCCACCACGTGCTTCGACAATCTCTTCTCCCGTTGTCTCTTCTGTCGATGCGTCTCCTCAGATCACGAGACGGTAACTTTTGAAAAAGAACCCATGCCTTCGAGCCTCGCCAGCGGCGAAGAAAGCGACGAAAAGCAAAGCTTC…
>Peanut_newGene_2942	Peanut_newGene_2942.1
GGAGAAAACTCCAATCTCACTTTCATAAAAATAATGCAATGGTTTCAGCACTCGCAATACATTCATCTCTTTCACAAACTCAACACTGACTTATTCTGAGGGGAACCAAAGGAAAGGACTAGAAAGAAAGCCTTAATCTGCAAATTGGCATTGATTTTTCACATAAATGTGTATTAGAAAACCCCCATTCCCTCGTCTCCTCCTTAACAATGTCTCTTGCATGAGAAATGCTCAGCAAGTTCTCCGTCATGTCAATGTCTCTCTCCATGACGGAAGTGCGCTCGTCCTAACTGGTGCAAATGGCTCTGGCAAGACCACCTTCCTCCGCATGCTAGCTGGATTTTCCCGTCCCTCAGCTGGTGAAATTCTTTGGAATGGACACAACATACAAGATTCTGG…
>Peanut_newGene_2947	Peanut_newGene_2947.1
CAACAACTCTTTCTTCTCTCTTCTGAACTCAAAACTGAAGCTCACTTCTCTCACTCTCTAGCACCTCATCTTCATAATCATCATTTTCAATTTCATCTCCATCAACAGGTTAAAATATTGTGCTGCTTGTGGAATGTAAGCAGCAATTACAAGAAGTCGGAATTTCTACATTTTACTGTGAGATTGAGAGTGCTAGGCTGATTGGACACTGATACCAATTTGCAGCCATGGAGTGTAACAGGGATGAGGCATTGAGGGCTAAGGAAGTTGCTGAAAGTAAAATGCAACAGGGTGACTTTCAAGGGGCGCTCAAGTTTGCTCTGAAGGCAAAGAAAATGTATACTGATGTTGAAAACATTGCTCAGATCCTTACAATTTGCGAGGTTCACAATGCAGCAC…
>Peanut_newGene_2950	Peanut_newGene_2950.1
GCAGACGAGATGGAGAGAGAGGACGAAGATGCGACGCAAGAGAGGAGGCTGTTCCGCCGTGCACTGTCGTCGCTCCTGGGGTCGATTGAAGCCGCCGCCGCAGCTAGGGCTTGCCGTGCTCCTGGGGTCGATCTCTGCGCTTCTCATCGTTGTCTCTGTGCTCACGTCGTCGATTAGGGAGCTCAAAGAGTTAGGTGTGACACTTCCAAAGGATGCATTCGAACTGATTTTTGTTTTCCTCCAAGAGTGAATCTTGGCAAATAGACATTCTGCACATAGGAAGCTGCAATACATATCAAAGTTAGAGAGAAGTGTAACTTCATTTCAGGTTAGTTATTTATTGCGGCATATAATTTAGCAATAACTTGCACCAATTTGTAATTTAGATATTACTTGCCC…
>Peanut_newGene_2960	Peanut_newGene_2960.1
GATTATTGTAAATTACCTTGCCGCCGCCGTTAGTAGAGGTAGCTGCCGGCTCTATTTGGAGACTGCTGCTAAGTCACCACCGAAGCTAAGAGCATGTGCTGGGATCTGATGGGGCACCGCTGCTGCTGTGGATTCGTAATATTGGGTTTACCGCGTTTAAATTCTTCAATTATGACTAATTTAGGAACATGAATGCTCACAACCCCCACAAACCTCCCTAAACCAAAGATGCTCAACACTGATTGAAAGATATGAAGAGGAGATGAAGAAATCATGGGAAGAACAACAAACCTCTTCTATGAAAGTGCTATTAAAATAAATGTTGAGTGTAAAAGAGGAAGTGGAAGAACAAAAAAGTGAGGAGGACAATCAAGGACGTCTAAACTCAAGTGAAGCAGA…
>Peanut_newGene_2962	Peanut_newGene_2962.2
AATTATATATAAACTAGTCACCACTACCACTCTTAAGCAGCATTAACCTCCAACCAAACCATAACTAACTAGCTTCTTAATAATTACTACTCACACTCTCTTCCTATCACTTTCTCCCTTTCTTTCTTTCTTTCTATCTCTATCTCTATCTGACAACGAGAATGTACACATACAAAATGAAAACCACGCATTCCTCTCTTATAATAGCTTAGCCTAATATCTCTTCTACTGTCACTGCCCAGGTTTCTCTTTCTCTGCATGATTCTCAAATTACTATCACGGGAAACCACTTATTATTATAATTATTTATTATATTTATTATATATAATATGTTCAGATGATGGAAAAATCCCAAACCCTAGCTAGTTCTTGAATCTCACAGTACTGTTTTGAAAGAAA…
>Peanut_newGene_2966	Peanut_newGene_2966.1
TTCTAACTTCTGTCTTCCTCCTCTCGTCACCAAACGGAACTGGAAAAGAACTATGGTCATCTCTTGCTCATTCAATGTGATGCTTACGTGTTGCTGAGGAAGGGAGCCACGAAGCTTTCTGCACCAACTCACCTCTTCTCCGCTGTATATGAACCAAGTTTCTTATTCTTCTACATGCAACAAAAAATGCACAAACCAAAAGCGAAGAAAGGGACAGAGACGGAGCCGAGAGAGGAAAGGGAGCAAGAATGGAGGCTGACCGAAAATAGGGGACTTTCATCCAATCAATTTTATTTGAGTTCTTCTTGCTGGTTAAGAACCAGCATCCTCCTTTCCTCGCCTCTTCTTAAAATTAAAAAAAATCAACTCTCATTGTGCTCCATTTTTTGTTAGTTTGAT…
>Peanut_newGene_2974	Peanut_newGene_2974.1
GAGCAAACGCATAAGAATAATATGGAAATTTCCTAATTGAAAAAGAATTACATGCTAAAGGAAAAGAGAAAGAAAGAATCAAGTAGATGTTGGAGAAATTAAAAGAGGGATGTGTCCTCTTCTTCGTTATCGACAGTGGTGCCTTGTAAATTCAGCTGCAAATTGTAAAACTTAGGCCAAAATTTTCCTTCAAACACAATAGCGTTTCTGTCCAACCACAGTCCCCAAAGTAGATAGTTTACCCGAGCAAGGTTATCTTTAAACTCGGATTTCTTCATCAGTGTCTCCACAAGCTCAATCCACCATTACTAAGGTTTGAGTTGAGTGTTTCTGGGGAGTGAGCTTGCAATGGGGAAGAGTTTTACATGCCTTACATTTCTGGACAGTACACTAGCACAT…
>Peanut_newGene_2983	Peanut_newGene_2983.1
TGAATCAGAGACTAAAAGTGCATCCCAAATAAGGTCCATATCCAATGATGGCATTCTGCTCAATTGAACACCTTCCACATCCAAAACTTGATGATGAGAAATTTTGCCTCAACGAGTGCTGAAATGGTTCCATTCAGAGAATTGGCCTTGATCACATGCTTCAATTCAGGGAAATTCAACTGTGCATAATCTCCTCTTAGTATATATGCTGCAGTATCATATGCAATGGCTGCATCTTCAGCTGTATCAAATGTTCCTAACCATACCCTTGTCCTGTTTCTTGGTAATCTTATCTCAGCAACCCATTTTCCCCAGTGTCTTTGTCTCACCCCTTTGAAAAGCTTGTTGTTGTTGTTGACTCTTCCACCTCCGCCGCTGCACTTAAGAGGTTGTGTCCTT…
>Peanut_newGene_2987	Peanut_newGene_2987.7
TATTCTCTATAGCAGTTGATGTTGACTTTATTTGCATTGAAATTTTTCGAATTTAGGCAAGTTTTGCATGGTGCTGTTGGTGCGATATCTCCACAAGTTCCAAGGTCGTAGTCAACAATTACCAGGGTCTACTCTGGTATGCTATTGTTATTAGAGTGTTCTCTGGTTACTTCTTACATTGGTTGATAGTTGCTTTCCTCTAACTTGTCATCTGGAAACAGGACATTAAGAGTGAGATTAATCCGGTTTTAAATCCCAGAGCTGCGGGGCCTGAAGGATCACTAATAAGCATGCCTGGTATTACTGATCATGTTCTTTTTCTAATGTAACTAGTTTCTATTATTCCATTGAACTGGTATTTGGTACCTGTCTTGTATGTTCTTTACAGTTAATTATTAT…
>Peanut_newGene_2988	Peanut_newGene_2988.3
CGAAGGTAAGCTGTACTCATCTCAGATCTCAGATCTCGAAGGTAAACTGCTCTCACCTATAGTCTTCTTTCGGATCTCAGATCTGCCGTCAATTTCTTAGGTTAACAATATATTCTAATCCAAAATCAACAAGTTGTGATTAATTTAGCTTATCTGATTAATTTTTCCACATGATTCCTTCCCGTCTACATGCATCACTCTTCCTAATTTTTATATTTTTAACTAAAAAATATGGAGCTATGACCTATTACTTTCCTAAAAACTTCAATCACTCTTCCTAATCGTTTTGTGTCTTAGATTTTCCGTTCTGTGTAGCTAATAATGAACCTCATTTTAGTTATGGTTTCCCAATAATTGGTACATGTCTTGAGATTGGTGCAGTACAGATATTGGTAGTGG…
>Peanut_newGene_2996	Peanut_newGene_2996.1
AGGGTTATGGAAATGGAAGTAGGCAAGTAGGGAGAGTTGCAGACAGGAAAAGTAGAAGAAAATAATAAATGAATAGATACATAGTGTAACTGTATTCAGTATTCTTCTATTCTCGAATATCCAGAGACGCATTAAAACTCCCCCTCAGAAGACTAACAAACTAGTTGGCAATTCACATGAAAAGATGCCATCACGCCACCCGTCCACGTCATCGCCACCAAACAAACCCCAAAACCATTTCTTCTCCTCCGCCTCCTCTTTCTTCGTCTTCTTCTTCCTCTGCCTTCGAAACCCAACAAGGAAGAAGAACCGGACAACTCCTTCTTCTGACTCCGACTCCAACCCTCCTCACCGCTTCTCCTACTCCCTCCTCCGCCGCGCCACCAACTCCTTCTCCAC…
>Peanut_newGene_2998	Peanut_newGene_2998.1
TTTGAATTGGATATGCAGCATGTCTTCAACCTTCCTTCTTCTGTTCATTTTCGGTGCCTTCGGACTTTGACTTTGTCTAACATTATATTCCCTGATAGTTCTTCAGCACAACAGCTTTTCTCTGGCTGCCCAGCCTTGGAGGATTTGTACCTAATCAATTGCAATTTGAAGAATGTCCAAGCTGTTTGTATTTATTCTCCTTTGCTTCGACAAATTCATATACGGGAGGACAAAGATGGTATGATGGATGAAGATCATGATGAGATAGGTGGTTGCAAAGTACTGATTGTTGGAACTAATCTGAAGTCATTTACTTATCACGGCGATTGTATGAATGAATATTTCTTATATCGTTCAACCTTGGTGATTGATGCCTCCATTGAGGTGCTACCTCCTGAA…
>Peanut_newGene_3008	Peanut_newGene_3008.1
CCAAGCTCAAGTCTATAAAAATAGCCCATGCTTCTGCCTCTCTAACTGAAAATGATGCAGCAACCTCCAGCATGGTAGCAAGCACAACCACCCCTTCTCAGTTTTTAATTACAACACCAACTCCTCCTCTCTTATCATTTATAATGGCAGCATCTACATTAACTTTGTATCTTCCTTGCTCTGGAGTCCTCCAATTATTCGCACTTTGGCTTTCTGGGTGAGTTCTTTGCAACAAGGGGACATGCAGGTCGGCCTTGGTTGCTTCCGTGTAGGCTTGGTGCGCTTTCTCCAGCAGTGCCTCTGGCCGAGAGTGTTTCTGATTGAATATTAGCTTGTTCCTATGAGCCAAATTGCGTGAAGACAGCAAAGGAAGAGCCCACCCCTTTCATCCCCAAAAAG…
>Peanut_newGene_3009	Peanut_newGene_3009.1
ATTTGCAGAGAGACACCGATATTTTTTGCGGTCTCTGCAAAGAAAAGAAATAAAGACACAAGAGAAGAGAAAAGAAAAGAGAAGACGAGGTTGTTTTGTTTTGTTGTGTTTCGTGGCATTCATGGAAACCTTGGCTACACCTTCCTCTGCAACTCTTCCATCTCCTTCTTCCCCTTTCTCCATCTTCCCCTCAACAAGAAGATTCTCTCTTTCTCCCAAATCCCTCCACTTTCGTTTATCTTCCAAGCGTGATGACGACCATGATTCAAACTCCCAATCCAATTCCATGGAAATCAACAACGACAACTCCAACGCCAACCTCCTCCCAGTTCTCAGCGATCGCCGCCTCTCCCTTTCTCCGCTCTCCAAAGTATGTGCCTTTTTCATTCCCTTTCCTTC…
>Peanut_newGene_3018	Peanut_newGene_3018.3
AAAGAAGCCGTCGATCCACTTTTTGTCGCTGTATCTAAGGAGATCACCACATCTCCCTTTATCGCCGTTCCTTCCATGTTTCACAGGTTCCAACTAGTGACAATGAAGACATCTTTTCAATTCATGCCTGGTGAGTTCCCAAGTTTATTGTTGAGGTTGAGAGAAACTCAATCCTTCAAATTGATTACAAAGAATGCTTGCACTGCCTCTGGTTTTATCATATTTATCCATATCCTTGACACAATTGGGCAATTTTTGAAGGCATACATTATGTCCTCAGTCTGAGTTCTGTAGCTATGACAGGTTGCTATTTGTTAGGTTCTAAGGACATTTATGGTTTCTATTTCTAGCTAAGGTTCGTTGTGAGTCCTTGTAACTGGTTTTTTCTCTTTATTTGGT…
>Peanut_newGene_3019	Peanut_newGene_3019.1
AAATTCCCTCCTTCTATCACCTACTTCTTTCTATTCTTCTTCTTCCTATTTTTCAGGATGGCATTGACAATTAGCAAGTGATGGTTTTTCTCGATAAGCACTTGCACAGCTTCTTCATCAAGATTGAAGTCTTCTTCAACGTTTCTACTAGCTATTCACAAAGAACCATATTGAGGAAGTGTGAAGATTGAAAAGATATTGAACTCTTGGGATAAGACAGAAGAGTTCATTGTTTTGAAGGATCATGGCAGCATATGACATGGATCCTGATGTTGTTCATAATCTCTTAGATGTTTGCACACTTTCCAATAATGGTTCTCCTAGTATCATAACTAGATATGATCCGGATTTAAGTAGCAGCTATGTTAGAGAAGGCTTCTGTCATCCTTTCTACGTGGA…
>Peanut_newGene_3023	Peanut_newGene_3023.1
AGAGCCCCAGTCGCTTCCTCTTCGGCATCTCTCGTCTTCCACGTTGCTTCATCGCCAGCATCACTCTCTCTCGCTCGCTCCTCCCCTCGCCCTCCCCTCCTCCACTGCTCCTTTATCTCCTCCTCTTCTTCCTCCCTTTCCTTCCCTTCCTCTATCCTCTCAGGTTTGTCGCTGGGATTGGAGTTGACATCTGATGTTCGGGCTAGAAGAGAAAAGGGTCGTGGCCTGGTTGTGAAGGCAGGCAAGGCTGCTCTTTGCCAGACTAAGAGAAACAGATCCCGGAAATCATTGGCTCGGACCCATGGTTTCCGCAGAAGAATGAGAACAACAAGTGGGAGAGCAATTTTGAAGCGTCGACGCGCTAAGGGACGAAAAGTTCTTTGCACCAAGTCCCACCCA…
>Peanut_newGene_3033	Peanut_newGene_3033.1
AGCATAGACAAAGTAAACAACATAGCTTCCACTTTGCCAAGGGTGACTTATTAGCTTCATTCAATTCAATGGTGCTCATGATGAAGTGGATTGTGGCAACATTGCTGGTGGCGGTTCTTCTGAGTAGTAGTGAAGTAGTTGAAGGTGCACCACAGGTACCATGCTACTTCATATTTGGGGACTCATTGGTGGACAATGGCAACAACAACAATCTTAACTCTTTGGCTAAAGCCAATTACCTGCCTTATGGGATTGACTTTGGTGGCCCAACTGGAAGGTTCTCTAATGGCAAAACCACTGTTGATGTCATTACTGAGCTTTTGGGGTTTGATGGTTACATACCTCCGTTTTCAAGCGCCAGTGGACAAGAAATACTCAAAGGAGTCAATTATGCATCAG…
>Peanut_newGene_3041	Peanut_newGene_3041.1
TTTTTCTTTTAGTACAAGCTTAAAAATAATTAAAAAAGTTCCAAGTGTACCAAAAAGTAATTGTTAGATGCGTGCCAACCACGTGCAGAAAGTGTTGAGACTTGAGAGCAATGGGGCGATTGGGCGGTGCCCGTCTGGTAGCGCTTGATGAATTGACAAAATTACCCTCTTCATGCGCTCTGATTGGCTAAGAACACGCGAGCGGTTCTCTCTTGACTCTTCACTTCTTCTTCCTCCTCCAGCGTAGCTCCACCTCTCGCTCGTTTTTCACCAGATCGTGGTGATGTTTATGCTCAACTTTTCTCATCGCCGCGATCTCTACGTAAGCTATTATTCTTCTTGCCTAACATGCATTGATTCTCGCTAGGTTTTGATTATTTTATTCTTTATCCGCTGGTT…
>Peanut_newGene_3047	Peanut_newGene_3047.1
CAAAAAGCCACATCTCCAATTAACATAGGTTAATCATAATATCTCTCATTTACTATTGTAAACCTAATTTACTCGCTCCTTTACCGTGCCGCCACATCCCCCAACTCCCCCTTTCAGCGTTGTACAACCCATCTGCCGTGCAGTCTTCGATGGTCATCACCGTCAACGGTAGTCAACGCTGTTGGAATGCCAGACAGCGACTCTCATGAGTTGCTCCACGCAGTCGCCCAAGTGCCGCCGCTTCTTCTGCATGTCATCGTCGGCCCCCATCTGAAGATGCATCCATTTGTCTGGCGTACCACCCGATGGTGCCTCCTATTGCTCCGCCTCAACACACGGCGCAGCTGAAATCTTCTTGCATCATCGAGTAACAAGCAAGCGCTACTACTGTTCGGCCTG…
>Peanut_newGene_3052	Peanut_newGene_3052.1
GAATTAGACTATCTTTTCTCACCCTTTCGTTTCTCACTCTCTCTAACCCTCTCGCCTCTCCTATTTCCGATAGCAGTCCCCTCATTCGGCAACCCCCTCTCAGGCGAGCTTCGATGAAACTTCGACAGTGAGCGTCTTGCATCAACGACATCAGAAGGAATAGTCGTGGTGACTGTCCAACATTCACCTCCTACACCTCCAAGAACGGTAGCGACATCACGCTCATCCAGAGTACCCCTTGTCATTTTAGACATGACGACAGGTAGATGTGTCACGAATCGACCTTGTGGTTGGGGGTAGAGGGAGGGTGTCTACTGGTACCTTCAGGACTTCTCGGTCATTGTCCTTTACGCCAACTATCCTTGGGATGTCACAGGTAATGGGGCCACATGATCAGCC…
>Peanut_newGene_3054	Peanut_newGene_3054.1
AGATCAAACAAGAAATTGAACATCACAAGAACAAATACATCCCACTACGCTTCAGAAACGGCTTCAAGTGCCTCAAAGAAAGTAAAAGGCGCAGCAGCATATGGAAAAGTCACATGGTTCTGAAAACCGGATCGGACTGGCCGTCAAACCGGTTCAACTGGGAACCGGCGATCAAGCGGTCCGATCCTCCACGTATAACCGCTCAAAGGAAAACCGCTGAAAAAGAGGGAACCACGCGTGAACCAAACCCCCCTCCCTCTTCCCCCAATCATTCATTCATTATTTCATTTAATCACTTGTCACTATACTCCCTGTACCGGAGATTGGAGAACTCTGAAGCGAAGGAACCCTAGCCCTCCATCGTCGCCGCCGTTCCCAGGTCGTCAGCGCCGCCGCCGT…
>Peanut_newGene_3066	Peanut_newGene_3066.1
ACTGATTCAACCAAGATTGTAGTTTCTACTCCTAATCCTTGGATGTTGGTACTACGAAGCACAGTTTGGAAAGAGATCAACTACACTGACCTGAGAGAATTTTCTTGGGTCCGAGAAAGGGAAGTTCACTTCCCCCAATGGACGAGATATGGCTCGGCTTGGTGCTATCCACGGTTTCAGATAAAAATCTATAATGTCCTCCTTTGCTTGTAATCTGAAGCCACCGTCGGTGACTCCTACGGTTGCTGTGGTCCCACGTCATTGACCCTAGAATAAGGTTGTTCATGGGGATGATTGTGGTCGTTCCTTCTTTTTTGCTGCTCTAGCCCTGCATCATATCTCGCCAATTCTGCAGAGGGATAAAAGCCCAATCTGTTTGTCTGAGGAGTCTCATCCCGT…
>Peanut_newGene_3070	Peanut_newGene_3070.1
AAAGTACAACAATCATAGGAATTTCAAGAGTGGTAAAAAGCAAAGTCGTTTATTCAATAGAGGATAAAAGCCAATTTTGAGAATAAACACGAGTGTCCATCCTTAAATGAAACACGTGAAAGAGTGATTGCGAGGTCCTTTCTATAACAATTTTTACAAGTTTTTTGTTGTGGCAGCTCACTTAGAAGAAACTCTAATTGACATGAGAATGATGGAAAGAGTCATTTAACAACTAACTAATCACTTGATTGAATTGGAAGAATAGAGGCAAGAGGTGACACAGATATTGTCCAAGAATACTAAACAAGAAATTTTCCAGAATCGGCGTCAGAATCATATACCTTCTAATGATGACTCTGATGAGGATATAACACCTCGACACAGAAGTCAAGATTTAGC…
>Peanut_newGene_3072	Peanut_newGene_3072.1
AGAGATTAGAGAGGCTGAAAAGCCACCTTCACTTCTCTCTCTCTCTCTAAATTCAACATTCCACAACTAACAAACATTTAAAACTCTTTTTTCTTCTCACATTCTCTTTTCCTCATTCCTTTTCTTCCACAGCCCCAAAGAGAGAAGGAAAAAAAAAGACATCACAACTTCAATTCGTTTCTTTCTTTCTTTCAGAAAACACCACCTGCAAATGAGGCACCTGAAACCGCCGCCAACCACCGCCGCCGCCGCCGCCACCTCTCACTTAAAAATCCGTTCTTTTAGATGATGACACCACTTTCCTCCTCCGAAATCCTTCGTCTCTCCGCCGCGGTGATATTCACGCTCTCTCTACTGATCCCCACTTCCCATGCTCTCGGCTCCGGCGCTACCCTTGCC…
>Peanut_newGene_3079	Peanut_newGene_3079.1
CCTCGTGCTCAATCCATCGCTACCGCCACTTTCACCCTCCACCATCGCTTCCTCTTCAACAGAATCAAAGGTTCCAAGCCACACACCTTGCTTCCCCATTGTACGACGATAACGGATCTCCTTTCAGATCCCGAATCTTCTCCGGTGACAGACCTCCTTTGGCCACATCTCTTCCCATGGTAATCTCCTCCGGTGATGTCACCTCTAACTTCCTCTCCTTTCCATCCTAGCTCTGCGCCTTCTTTGCCAAAATCCTCAGCGCCTCCCTCAGTGTCTTCTTCGATGACATCTCTCTATTGAAGATCTGTAAATCCAAGCCATCACAAACAGAACAAGCACAACTCTCCCCTGCTTCCTCTGTTTTTCTTTGGCAGAAAATTTATGGGAGAAAGCCCTGGT…
>Peanut_newGene_3090	Peanut_newGene_3090.1
GGAAAATCTATCTAGAGAATATAAATTTGGGGTCATCTCCGAAAATATGATTCTCCACACCATTTCATCTAATGGTTAATATCTAAGTGCCTATTCATTTAACAAGTATCTATCGTGTCCTAGTTCGTCGCAGAAAAATCATCACTACTGCCGCCACCACTCTTTTGTAGCAAACATTAAATTTGGTGATCTCTCTCAATTTGGAATTCCTCGTCCAAATAAGGGACCATTCTATCTGAAGGAAGCTGCTGGTAGGTCTCCAATTCTTGATGTTGGAACCATTGCCATGATTAAAGACGGTGCAATCAAGGTATTTTTTTAAATAATCAATAATATTTTTTAATTAATTTATGTAATTCCTTATACCAACAAAACATATATGACAGGTTATCTCTTCTC…
>Peanut_newGene_3093	Peanut_newGene_3093.1
AGTTGATACTAATTGCTGCTATTACTTTCATTTAAGTTTATCACCTTGATTTGCAGTAGCGAAACCATAACAGTGCGAGTCTATGACAAAACTCAGTGGGAGGAGAAGGTGAAGGTTTAAGAAAAGTAATGAGGACTTGCTTGCTCTACATGCATGCCAAAGTGCGAGTTTCTACATTTGGCCATGCAGTTTCTTGAAGCTGTCCACCAGACAAGTTTGAAGCAGCATAACGGTGACCTTAAGGCTGGTGCAAAAGCATCCTGTGCTGGAAGGCCATGGATTTGTGCATGTCTCATTTGTGGTTTCGCAGACCAGAGTGAAGCTTGTGCGTTTGAATCAAAATGGAAAGATTTATCAAGGAAATCTCCTCGCAAAAGTCAAGGTGGCAGTAGCTCAAAC…
>Peanut_newGene_3105	Peanut_newGene_3105.4
CAGAAGGAAAGAAATGGGAAGAGACGAGAAACAGGGGGAGCTCGAGGGGAAAATGGAGAAGAAGAGGAAGGAGAAGCGAGGGAGGGGATGGCACCGGGAAGGGTTATGCCATCGTCATTCTCATCGTCAGGTGAAGGTAGAGGGCTGGCCGAGAGAGAGTCGGATGTGAGAAATAGAACGACATGCGTGAGAGGGAGACAGAGGCTGCGACGGAGTTGTCCCGCCGCCAACGCCTCGACCGCGATGAGGAGTAGAAGAAGCCGTCACCTTCACTGGAGCCACGATCGCTGTCGCCGTTCTGCCTTCCCTTGAGCCGCCAATACCACCATATTCTTCCAATCCGCCACACTTACCGCCGGCGAAGCTTCTGTTGCCGTCACCGCAGAAAGGGGGTTGCTG…
>Peanut_newGene_3107	Peanut_newGene_3107.4
CCTTAGACCTCCTCTTGCATTATCTCTTCTGTCGATGCATCTCCTAAGATTGCGAGACGGTAACTTTCCAACGGCGAAGAAAGCGACGAAAAGCAAAGCTTCTCCTTCAAAAACAAATTCTCTTCCCGCAATGCTTTTCCAAGTATGATTTCGTTAAGGTGAATGTACGGTTGGGTGATAATGCGGATCACTACTATATGTTCTGTCCAGATTTTTGCTCAGTAAGATGCTAACTGTAACCAAGGTTGTTCCAGTAGCTTCAATGTTAACTCCTAACCAGTTTGAAGCAAAACTACTAACATGATTCAGGTAATTATCCCACAATTAAGGCTGCATGAAGCCTTTTGTTCCCCCTGTTATATAGTTTCCTTTCCTTTATTTTTTTGTTTCAATGTCTAC…
>Peanut_newGene_3109	Peanut_newGene_3109.1
AGTTGATATGCTTATTGCTTGCAATTCTTTTACTCTGCCAAATATTTTCAACTATATCATTGAGAGCTAAAAAAGAAGATAATTTTGTTTCATTACAATTTTGTTAGCTGAAATTGAATTTAATCAACTCAATTTTAAAGCTGACAAAATGTCACACTCACGATTTGCTTTTCAACGTAATGCATGATTCTCAAAGAACTGCTGGCTGGGTTTGTGGTCAAGTCTTATATTATGGTCAAGTTGAGATTTTTGTTCTTATTTCTCGGTTTGCTGCTTTGGTGTTTGCTTTTGCATTAGTGTATATGGTGGTGTGCCAGGTTTCAGTTGCTTGTTGTTAAACCATGTTTCATGCGTTTTCATCCTTTTTTTGCCCTTATTTTGTGAATGCAGATTGGCCCT…
>Peanut_newGene_3111	Peanut_newGene_3111.1
TTAGAAAAGAGAGGTGCAAGTGCAGAGAAAGAAAAGGATAGATAGCTTAACGGTACCAACAAGAATTCAGTAATCCACCCAACTAGAATCCAGAATTTCCAACATTTCTCCATTTCTCGTTTTTCGCAGGGCATTCTTCACTCACTGCCATTCTCACCTCTCAATACATCTTCCAAGCAAACACCCAATTACCCTTTATCTCACAAAGATTCCTTCTTTACCGTTTCTCTCTCGTAATCGGTTATTCCTCCTGAAATACAAAAGCCTCAATTCAAGAAAAAGAAAAACCACCCCATTGGGTTAATCAAATTCGCAGGCGAGCTTCACCGGCAAGCTCGCCTTTTGTTTTTTTCCTTCCCCCAGAAGCCATGGCCACAAAGATTCTTTCTCCAGTTGCAA…
>Peanut_newGene_3113	Peanut_newGene_3113.1
GAGGATTATGTGGGGTGTTGGCTTCCTTAACTTATTTTGTGTTTATTTAGGGGTTATGATGGAGGTTTAGTGTTGTGTTGGAAAGAAGATACGGTCGCTCAGGTAATTAGTTGTGACGATTACTATGTGTAGTTTCTACAGACATATTCTAGAACACAAATGATATTGGAGATCATGGAGGTGTATTTAATCATTGAAGAAAGACAATGAGAGATACAATATAATGAGCTTCTCAATCTAATGGCTCACAGAGATGGGCTGAAATTAGTTATTGGTGATTTCAACACATTAGAGCTTACCATGAGAAGGAAAGAGGTTATGAGGAACCAAAGTACACTTGGTCTAACAAGCAATTTGGCAGCAACTTTATCAAGAAGAGACTAGATGGAGCTCTTGGCT…
>Peanut_newGene_3115	Peanut_newGene_3115.10
GGCGTTGCTCGTTGCTCCTCTGCTCCTCTATTTCTCCATCACGAACAGAGTAGCTAAGTGAAACAATTATGGTTTAACTTTTGTATTTGTGTCTTTATGCATCCGACCTGTTCCACGAAATGCTTCATCCATCTAAGAAAATCAAGGTAAACCTTTATGCTTATTCCTTTGAGTCTCTATCTTATTGTATGTTAAGTTTCAATTTTAGGGTTTGTGTAATCATGAAATTTTTATTCATTTGTTTGTAAACTTAATATTTGTCTTGCAATATAGTTTGAGTCATGAAAATGTAAAATCTTATTACGAAAAAGAATAAGGTGTTACATATATTCCTAATTTAGATGTTCAATTAATCCTCTGCTGCTGTGTGTAATAATTTTTTTGTACTTTTATTTTAAT…
>Peanut_newGene_3116	Peanut_newGene_3116.3
ACCGCCGTCAACTAAGAATTGGTGGCCAAATTAGGTTTCCTGCATACACACGATGCCTGCGTACTCATGATTTTGGATTCCTGCATATGCATGAATTCAACTTCCTGCATATACACTATGCCTGCGTACGCATCATTCACACACCCTCAAGGGACGAGACAGGTTCCGTGCGTACGCACGATTGTGCTAATTTTTTCAAAAATATTATTTTTGAACTATTAAGCCTTTTTGGCGAGCTTATAATTTCCTGTAACCTCCGCATGAACTCTGAAAACCATATTATAGGCTTTGAATATGCTGGGTGGATATAATGGATTCAATTGAGTAATTCCCTTATGAGAACTTGTAAAGTGAAATGTTTTAAATGTTGTGGGGATGGTAGTTCGTCCTGTCCATGAT…
>Peanut_newGene_3118	Peanut_newGene_3118.1
AAATATAGATATAAATTATTACTGATCAATAAAAAATGAAAATTATTTACTGGTTAGATAGAGTGTTTGGTACGGTTGCGGATGTTTGCACAACATACTAGTAAAAATTGAAGAATGAGAAGGTGCAAAGCGTTGGACAAGGTACCACTAATGCATATATAGCATTGTGTAATAAAGGAATTAAGTGTTCATGTATAGTTTATATGCTTGGATCCTCTATTTAGTTTTGTCGATTGGGGGAGGACAACAATAAAAAGTGTTGTCGTTTTCAGCGAAGAGAAAGCAGGGAGACATTGATTTGAACCTAAATTTCAACAATTGTTTCTCTTGTTTGCGTCCACTCTCCTCCTCAGATGAATTCTTACGCACCCAAATGCTTCCTTCATTTCCTTCATTCAC…
>Peanut_newGene_3125	Peanut_newGene_3125.6
AAAAAGGTAAAATCATATAAATAATTGTTCATTACTATTAGTGTTGTATGTATCGTGTTCCTTTTTACTACTTTTCTTCATTTGTTTTTCCAAAGTCGAATCCATGTGTTTTGGTACAAATTAAAGAATATGTGGTATAGACTTTAGTCATGGTTGATGGATGGAAGACCGGCATACTGCGCTTTTAGCTATCACATCACCAGTGATAACTTGTGAACAAGTTCAACTCTACAATCATTCATTCATTCATTCATGTCACTCTCTTTGTTTCTCTCCACCAACTAAATGCACTACACTCTTAATTTCCCTTCCAGCAGCCTCTTAAGTAGAGTGCTGTGTATATTTACAGCAGCCTCCTAAGTAGACCAATCCATCTTAAATTCATTGTTATAGTCAATT…
>Peanut_newGene_3132	Peanut_newGene_3132.1
TTGAAAATTAAAAAATAATTTTGAGGACATATAATCATAAGAATGGTTTTCTATATTTTTAGGATCCTGTATCAAATATGTTGGTCATGAAAAAAAAATAAAAATATTGTTTTTGTAGTGGAATTTGTCTTGTGGTTGCAGATCAAACTTGGAAGTTTATATCAAGTAAAGATTCAGATTGTCAAGAGCATGGGTGGTAAAGATAAGTGGTTCAAGTTGATGATTATGTTTTTGACACTTATCCAAACTATATTTCTATGATGTTTGCTTATGCTTATTTGTTAGTTTTGCTATTTTTATACAATAAAAACATGCTTTAACTTCTAAGAGTGATGTATAAAATGATTTAATCTGGGAACAAATTATTGCACCGCAAGAATATATTATTAAGGCATGGGG…
>Peanut_newGene_3133	Peanut_newGene_3133.1
GGCTGGGAGCGCCGTTTCTTCCCAAATCCTTAAGCCTCAGTGTCTCACCGCAAGCCCCAACTCTCCTTCCTCGTTCCTCGATTGCTGCCACTCTTCTTCCTCCTCTGTGCTCTCCTCGCAACGCCACTTATTCGTGACCTTCTCTCCTCTTTACGCTACTGTTGCGTGCTCTTCTTGTAGATATAAAGAGGGAAAAGAGTGGAAGGCAAAGTACAACTACTGTAAGTCTGTTCTTGGTACCAATCCAAGAAATGGGAATATAAATTTGAAGAAACATGTGCTCTATTATTGGAAGAGAATAAAATTAACAAATTTAAGACAATCAACAATTGACGAATCTCTTCAAAGACATGGAAAGAATAGTTCAGATGCTTTTATATTTGATGTATCTCACACAAG…
>Peanut_newGene_3135	Peanut_newGene_3135.1
AAGGGTATTTACTCGTTTTCTCAAAGGAAAAGAAATACGATGCAGAGAGAAAGGTCTTCGTCCAAATGAGCTTAGTTTCAGTGAAGTGGTGTGGTTGCGATGTCTCCATCGAATGAACTTCCGACACGAATTTCTGAAAATTGAAGCAATTTAAAGTTCCTTATCAACTGTGTGGTGTATTTTCCTTTTGTTTCTCGAGAAAGTGTGTTAGATAGAGGAAGAGAACACGATGGAAAAGATGAACAAAGCCTTCGAGAATGTGAAGATCATGGTAGGAATGGAAGTCGAAGATGAAGAGCAGCGAGCTACTGCATTGGACGACAGCAGCTCTTACGCATTCATGGACGAATTCAACCGCAACTGCACCTTGTCCATCAAACAGGGACATAGATTGAAGAC…
>Peanut_newGene_3136	Peanut_newGene_3136.2
ATTTCTAAAAAAAGAGAAAACTTAAAAAAAAAACAAAAAAGATAACTAGCTAAAAAAGTAAAGTTAATAAGCTAAGAAAGAAGAAAAAATGTTGAAAAAACAGAAGAAAAGAAGAAGCAATGTGTCCTATAAAAAATGAGTGTGAATTCTTTGAAATTTCTCAACCAACTTAATTGTCAGGGATAGAATTTTTTCAGGAGTACGGCACTGGTTCTCAAAGATAAAAGCGTTGTGGGCTAACCATGCCATCCAGAGCATATAGGCCATAGTCGCAATGAGCTTTTTGCTATTCGATTGGAGCTTCGTGTTTTCTACAGATTGTCGTCACCACTTCTATGCATGAAGGTTCTGGTCTTTAGAAATAACACTTGCCATAGCAGATCTGTTCTAGGTTTCCTC…
>Peanut_newGene_3138	Peanut_newGene_3138.1
GTTCAGCCCCTCTATCCGTTGCCGTTGGCCATGGTCTTCTTCTCCACGTCATGCTTGAAGTTGTGGCATTGTCGTACCCGTCCTCATCCCCAAGTTGGTATCCGTTGTCGTCATTGTCGGCCGGAAGAACGTCTCTGTCCCCGCGGCAAGCCCTTGTCCTCGAGCCCCTTTTCTCTCTGTCCGAGGCCCCGTCGTTCCTCTCTCGCTTTCAATACCATTCCTCCCGCTGCCGCAAACCACCACCTGCTCCACAAACTTGCACGAATGGTGTTCAAAACTCAGAGTTGAACGATGAAGACTTAAACCCAGAAGCAGATGAGGTAGATTCTTTTGAGCAATACATTGATAACCTGTTTGCTGCATCGGAGGCTCAAAAGCACAAGGGATGCAAGACCACAG…
>Peanut_newGene_3147	Peanut_newGene_3147.1
TTTCTACGTTCTACTTTGCCGTCGAAATCCTCTTTATAAACCGATGCAGCATCTTCTTTCAGTCACTTCCTCCAGGTTATGCTTTTTCATTCCTCCATATTTCTGAGTTAGATCCCTTACTTAGGTTACTCTATTTCGCTTCTTTCTTAATCGTGTGTTTGTTTTCAATCAAGTGATGAGAAAATAAAACTGCAACAATATGAAATGGATTCAATCCATGATTACCTGTATTTAAGTCTCTGATGATTTACTAGCACCTTTTTGTTTCTCCTATTCAGCTTCTTTTTCATTATTATTATTTTTTAATTTTGTTTTCGTGAATTGAAAGCTAAGAGACATGATGATTTTTATATTGGTCCGTGTTTCTGAATTACCGTGACCGACATCTTTTTCCAATCT…
>Peanut_newGene_3150	Peanut_newGene_3150.1
ATATCATTAAACACTAGATACGCGTGGTTTCGTTTCCGAGCTGGAGAGCTCCCCGCAACTCACGCCGGTTCCACTCCGAGGTGGACGGTCCCTTCCACGGTGGCACCTCCTCCACCTGGCCCCATTCTTTGGATGGTGCATGTGCTGCTCTGACACCAGTCGTCACCTATCGATTTGGGCTCTTCTCTCACGCAACCTCTGATACTTTTCACCGAATCACTGAGGCAACCTTCGTTCTTGATGGATCTGTTTCAGTAGGTAATGATTTCTTTCAACCCTAGGAGCTTTGCTCTCGTCTCCAAGTTTCGTTTCGTCTTCCGTACCATACTGTGTCTAGGAGCCGTGTTCTCCTGGGAGTTTGTTCCTCGCCGTTCATCCGGTTTGCGGATTTCCCAATTT…
>Peanut_newGene_3151	Peanut_newGene_3151.1
GCTGCAGATAGAGACATACCTAATCCTGGTTTAAGTTTAACCTCTATGGACGAGATTCTTCAAAAGCGCTCTGATTATGAGTACCTAATAGATTTTGTTGGGGTTCTGTGCGGATTGAAAAGGAAAACTGATGTTGAGTTTAATGGAAAGATATTCAGAGTTATTGTCCTTGCAGTTTTTGCAGATGGGAAGAAAATCCCCTGTATTCTTGTTGGTGAGTGTTCTGCTCTTATGGATATCAATAGTTTGAAAAAGTATCAGAGAGCACCAGTTCTTATTCTGGAATCTTTCAAGATCCAAGTCAATGGAGATAAAGTTAGTCTTCAAAATGTCATCAATGTTTCTCGGGTTTCAATCAACCGTGATATGCAGGAAACAATGAATTTTCTGAATGGATAC…
>Peanut_newGene_3153	Peanut_newGene_3153.3
CCACACTCAACCGCACCCTACCCCTTTCTCTTCCTTCAACGAAAAGTTGCAGAAACAGAAAATTAGAAAGAAAAAAAAAGCAGAAAGGAAGGAGAAGAAGAGGTCTGCAATCGAGGAAGGGAGGGGAAGAGAGCGACGCAGCCGCTGCGAGCTGATCGTCGCCGATCCCGTCACCCGTGCCGTCCGTTTTCATCGCTGCCAGCTGAAGAGAGATGCGATGGAGAGAGAGAGAGAGAGGGGGTCTGCGGAGGGAGGCGTCGCCGTTTCATGTGGCCGCGTCGTCGTCGCCGTCCTTGGAGATCCACGAACAGAGAGAGCACGCACGGGGTGGAGGACGGCGCTGCTGTCACCGTCGTTAGAGCTACCGCGAGAGAAGAGGAGGAAGGGACACTGTCTTGC…
>Peanut_newGene_3156	Peanut_newGene_3156.1
TATGTATTCAGTGCTTCATCGATTGGATCGTGGTCGTGAATAGTGTTCTGCTCATTTGAGTATCTTGCTCCAATATGATGGACAAGGAAAGTGAAGAATTGGCATTAACCCCAGAAGTGACTAAGCCGGATACGGTTGAAACAAGAAGGTTCTCTTCTGGCAAAGGATCTTCTGGAAATAACACTGCAAAAGTTGTTCCTCGTTATCTCCGAGCTTCAACTGGTTCTTGTCATGATTTTTGTAAATATGGGAGGAGGCATGAACTTGAAGGGATCGAAAGGCGTTCTATACCTGATAGAGCTACACGAAAACAACTTTACCAGAGTTCTCAAAAGAGTATTGGGGGGATAATGACATCGGTTGCCAAACTCAGAGGGTCGCTTGATTCAAGGTTGCCTT…
>Peanut_newGene_3159	Peanut_newGene_3159.2
CTTTCTTTTCAAGATTCATTGCATTATATTAATGCAAGTGTTTGATAAGTATTTTTGGATAAAAAGATTGGAATTTATGTGTTTGGTGTGTTGGCAAATGACCAAACCAGAAATCAATGAGGCTGAAATTTCTGAAAACATTGTATGCTACTGCGCACCATAATTTTCATATTATGCACTTTTTTCTCCTTTTCCCCATTTGAGTGGCTAGTTTTATGGCAATGCAAGAACGAATTCTCTGATTGTGACTTAGTGATTTTATTCATTTGTTGCAGCTAAACAGAACTAACATGTTCAAGAATTTTTTTTATACTGCTGTTTTTTATTTGTTACTGAGTGTTTAATTCCATGTCATTCAGTCGTAATCCGCTCTTAAACTAATACTTTTGTGATCAACTG…
>Peanut_newGene_3162	Peanut_newGene_3162.1
CCCAAATTAAACCCTAATTCCTAAATTAAAACCCACAAACCCTAACCTCCACCACCTCACCGCCACCCACCCACCGCCACAGCTCCCACTCAATATACACAAACACACCCACACACAGCAGCAATCAAGAGAGAAAAGAAAGAGGAAACGAAATACAGGAAAGGAAAGGAAGAGAGGACTGGGGGAGAAGTGAGTTGCACCGCAGGGGAGAAGAAGGAGACCGAGCCGTCGCGCCTACCTCCGTCCATCTCGCGTCGCCGCCATTTTTTCAAGATGCTTTGTGGCGCCACCCCTCCTGGAGCCCGAGTCTGCATGGCTATCATTCGTCCGCATTTTACCGAGCGGCCGTGGACAAGGAACCCCGTGCAAAAGAGAGTTGTCAAAGGACAAGCAGATCGC…
>Peanut_newGene_3163	Peanut_newGene_3163.2
GATTTAATTAAGCTTTTGTGGAAGGAGACGTTTCCTCGTTTTTCAGCTGTTTGTATCTTCTGACACACCTTGATTGCATTTTCATTTTCATTTTCATTTTTTTTAATTATCAATAGATAGATTTCTCAGCTATCACAGAAACAAAGACCCTCTCTCTCTATCTCTCTCTCACACACAACGCCTTCAAAGGTTCTTTGTTGCTCATCATCAAAGGGTGCTTTAATAACTTGCTTGCTTGGCTGCATCAAATGATTTGAAAAGAGAGGTTGGGTTTGGGAATTGCAGAAGATTTTGAGTCTGACAGAGATCTTTACTCTTTGTGTGTGTTAATTATAGGCATGTAACTGTATTTTGCTTTTGATGTGTATGTCTCTCTCTATCTATGGTCTAATCCGTTTA…
>Peanut_newGene_3167	Peanut_newGene_3167.1
CTGCAAATCTGAATGAATATGCATATGCATAAACTTTTTGATAACCCAAAAAACACAAAAAATATTTGTGCGTTAATCTCTGATGTGGTTCAACCCATCATCTGATGAAAGCTTCCTAATTTTTCTTGCTTGGGATTTTCCTAGTTTCAGATAGTTGTCAAAAATTCAGAAAGAAAAAGAAATTGGTTATGTCGAACAGGAAAGCGTTTCCTGCGTGGAGCTTTATTGGCGACATTTGCTTGTGTCGCCATAATCCGTCATCAGAAAAGATGAGGATTCTTGAATTGTCACACTCTAGTGGCAACGGTTCTACTTCTTCCTCAGACGAAAAATCTCAGGATGCAGATTATTTTGACTATAAGATTCCATGTCTAAGCGATGAGCTTGAGACCTTGATTC…
>Peanut_newGene_3169	Peanut_newGene_3169.1
AAGTAAAAAAATATCCGGTAATTAACAACGCCGTGTAATAGCATTGAATTACAACCCTTTGTGATAATCCCTTCACATTATCCTTCATTAATTCATTTCCTTTCCGGGCTTATAAATAGCACTAAACCACAACCTTTGTGCCTCACACCAGAAAATTAAAGCCGAAAACAAATTAGAAAAAAAAAATGTCAGGAATCATCGAAAAGATTGAAGAGGTCCTCCATATTGGAGGGAACAAGGATGGTGATCACAAAGATGATGACCACAAAGGAGATCATAAGGAAGAACACAAGGATCATCACGATGATGAGAAGAAAAAGAAGGAAAAGAAGGATGATGATGGAGATAGCATTGTGGACAAGATCAAGGACAAGATCCATGGAGATCATGATGACAAGG…
>Peanut_newGene_3178	Peanut_newGene_3178.4
CTTAATTTTTCCATAATAATCCAATCTCACAAGGACTGGAAGCAGCGACACCTCCTTCAACTTTCTCTCAGATCCGGCTTCTTCAGCCTTCACCCATTTCACCAATTACCTCTCCTTTCTCACCAAATAAACCTCCCTCTTCTCTCTTACATTTAGGGTTCCCAAAACCCTATCAAGAATACACAAAACCCTATCAAGAATAACACGGCAAGAAGAAGAGGAGGCAGCATCACATCATGGCGGAGCACCTTGCATCGATATTCGGAACAGAGAAGGACCGCGTCAACTGTCCATTCTACTTCAAGATCGGAGCGTGCCGCCACGGCGACCGCTGCTCCCGTCTCCACAACCGCCCTACGATCTCCCCAACTCTCCTCCTCTCCAACATGTACCAGCGCC…
>Peanut_newGene_3182	Peanut_newGene_3182.1
GTTGAATACGCGATACAATGCATTTTCCGCGGTTAGAGATTATCTGCAGAAAGTGATGGGTCCTTGTTTTGTTGAGGGGAAGGAACAGCTGAAGAAGAGAGCTGTAGGTTCTGTTGATGGAACCCAGGAGCCTGCAAGGAGGGAAAAAGTATGCCAGAAGGGCAATCCTCAACTTCAACGCAAGGTCCATGCATTCTCAGATATGATAAAGGAGTTAAAGTATCTATTGCTGAGGAATTGGACAGAGAAAATTCAGAAAGGTACGAATCAAGAACAACCT
>Peanut_newGene_3183	Peanut_newGene_3183.3
AAAAAACAACAAAAGAAAAGAAACTTAATTTTTTTCTTCATCTCACCACCCCCGCCACCCCCACATCCTCTGATCCTCCTCTTCCTTCTCATTTTTCTCTTCATGTCACCAACTGGAAATTGTGTTTCAAGTTACCAAGATCGGTTGGGCAGTCCCGTTCATCAGAATAGAGTTGGAAGTTGCAAATGTGGCAGTAAGGAAAAGCCTTGTGTCGAAGGAGAAAGAACTGAGTGAACCCAGGTAAAGAAGAAGTTTTAGCAGCAGAGACTATAGCACAAGCAACCAGTAGGGTCGAGATTGTAGCTGAAGATTTGAAGTTTATCTTAAAAGTCAGACTAAATAGGAAAGGAGATTTCGGAAGTCCAGAGAAGTAGGGCGACCCAGAGATGGAGGAAGCAC…
>Peanut_newGene_3190	Peanut_newGene_3190.1
AATCAGTAGAGACGCGCGCTTTCATTCTTTTCTTCTCGAAACCACAAAGAACATCACTCTTCCTCCCTCCACCTTACCATCAACCCTAACCCACGCCTTTAGATTCCGAGATCAAACACAGCTCACCAGGAAGCTCAAAATCGCAAGTCAGCAGGAGCAGGAAGCCCTAAATCACAACTCACCATCGTCGCACATCATCGTCGTTGCGTCTTCCCCAACTCATCGCGACCTCCTCCTTCCCGGCGTCGCTGAGTCTTTCCTCTCCGCGGCTTCAGTGCTTCTCCGTTCTCCGCGGCATCCTTGCGTCTTCTGCTTTGCTGCTTCTCCCCTGGTCTGCTTTGCTGCTTGTACTTCACCGGGTTGTGCTTCGTTGCTTCTGCTTTGCTGCTGCTGCTTCAC…
>Peanut_newGene_3193	Peanut_newGene_3193.1
TTTTCAAAGCTTCATCATGGTGCGGTGATCGATTGCTACTTGCAATCCATTTGAACACCACCTCTCAGTCCAATTTTCAGTTTAGCAACTTCAATTTCTCTTTCTTCTTTTAATAAATTTGTCAATTCTTCATCTCATCTTCTTCAATTTGTTCTTGAATCTGCTCATCTTCTTAATCTCCATTCTTTCTTCTCTTTCCTTGGACTCAAACAATAGAGATTGATGAAATTTGTTTTGTTTCACACTTTCTTCAATTGAGACACAACATTTCGATCAACGAGATCAAGAAAAGAAGGTCTGGATCTACATTCTTCAAGGTCCATTGATTTTCATTCTGCAGTTCTCAAAGATTTTCCAAGATCATGGAACCTACACCAATCAATACACAAACAGCAATGA…
>Peanut_newGene_3195	Peanut_newGene_3195.1
TTATAGTCACCACCCCCACAAATAAAACTAAGTTAGATCACAAATATTTTCTCTATTTGCTTCCCTTTTGTCCAATCTTCATCATTCGTCATAGCTTCTTTAAAGAACCTCTTGTTCTCTGGTTTTGGAATTGAGACAGTGATGAAGAGTTGATGAAAGCACTTGAGCCTTTTATTATGACAAGTGATTATTTTTCATCTAATTCTAATAATAGCAATAGTAACGATAATAATTCCTTACCCTCTTTTTCTCTCTCACCTTCTTCCCCTGCATCATCATCATCATCACTATACCCTTCTTATTACAATTCCTTCACTTCTAATTACAACCCTTCACCGTTAAATTCTACCACCCAAAGTTCCTCCATAAGACTCAACCAACTCACGCCATCTCAAATTC…
>Peanut_newGene_3196	Peanut_newGene_3196.1
CCTAACCTAACAGCGTCTCCCCAAATCAGAAAAGGAAGTTGAAACAGGACTGCCGCAAGGACTGCCGCCGTCCGTCTCGCTCAGGCGCTACCATCGTCGTCTGGTCGTCCATGCTTCTTCCTCGAGCTCGGCGCGCCAGTTCCTGGTCTTCATCTTCTCCGTCGCACTCCTACCGCCGTCCGTCGCGCACTCAGGCACCACCATCTTCGTCTGGTCGTCGTGCTCGAAGTCCCCAACCCACCAATTGCAGCTTTGAGTCTGCTCTTCGTTTGCTCAGCCGTAGGTTCTTCCAACCCACCACCGTCTTCTGAGTCGTGCTCGTTGCCTGGCCTCCGTCTCCGTCGCGCTTCTACCCCTCTGCTCAGACTGCTCAAAAGCTCAACCAAGAAAAAAACCATA…
>Peanut_newGene_3206	Peanut_newGene_3206.1
ATTGATTTCGCGTGATAACCTTCAAGTATTTGGCGCGAGAACCCTTCGTCAGAGCCAAGGTATAGCAATCAACAAGGCTCCTTCCCCGCCTTCCCTATCCTTCCCTCTGTCAGATCCAACCCACTCCGCTCCATCGTTGTTCCGGTCACCAGGATCCTCTCTCCTCCGTGTAGCTCCTGTGCACGAAGGTGAAGTAGAAGGGGTCGTCGGAGTCTTCTCCTTCTGCCGTGCATGCGTGTGAAGTTGGTGGCGTCATCCCAATCCATCCGTCCCTGTGTCATCCTTGGCAGCCTTCTCCCCTTTGGCGGTGCTTCCCGTTGCCGATTGCACTAGTCTCCCCTCTCAGTGGTTCTCTGACGAGCGGATATATCGGAGCTCTGGAATAATTTACTTGGGGTG…
>Peanut_newGene_3213	Peanut_newGene_3213.1
TTAGTTTGTGTTTTCAAAGATGTTTTAAGCATTTAAGGTAGTTTTGATTGAAAACCTCTCATCTTCCCCATTATTCCACCATGTTCACATTCTCTTTTTACTTCACCCTCCTTATTTCTTTCATGATGAGAAAGAAGGTTTTCATAAGCGGGACTGAAACCATAAGACCTCCTCATAACCCTCCACCTTGTAGACCTTAATCTCACACTCACATTCATATTTACTTACACTCCTCTTCCTCACACTCCTCACAACCACCCAAGTTCATAGCAAGAACCAAGACTACAAACCCTAGGCCCTCTTCATCTGCTCAAGAGACTGGCTCCTCCAAGGATAAAGTGGCGAAAGGAAAACGGCCCATGACAGATGAAGAACCTCCTTCCTCTCCTCCTCCTCGGA…
>Peanut_newGene_3214	Peanut_newGene_3214.1
GTGAATTTTAAACTGCCGGTAAACTTAGAATTCACACATTGCTTTCTTCATGTCACAAACACATCAATTTAACTCATTGTAGTGTATTCAACCTCACTCTCCTTGTTTGAATTAATTCTTGATTTAAGTATTGCTTTGCTTTGTTTTACTCATCTTGCTTGCATCACTTGTAGTTATATTTTAATATATTCTCTTTTACATTTTTCAGGATGAGTCATCGTAAAAATAAAAAAAAGGAGATGGACATGGATGCGGAGGATACCCTGAATAAACTTTCTATATTTGTTTTGATTAATGCTGCTGTTTGGAAATGTTGCTGTTTCATTGATTTTTTTTCTGTTTGTTGCTGGTGATTTGCCCGTGCTTGTTTGGCTTGGTTGATGCTGCCGCTTGAACCTA…
>Peanut_newGene_3220	Peanut_newGene_3220.1
TTATTAATCGTGTCGTTTTCAAATAAAAATGATATACTTGTTTTTAATGGTTTGTTATCATTTGTCCTGAGTAAGTTGAAGGGCAAATGAGTGTAATGATTAGGTTATGGGTTGTAGTTCACTATCTTATGTATTTTGCTTGTCCCTTCAGGCCCTTTCAAAATTACATCAGCGATACTTTTAACTGTATTGAATAGAACCAAGTACTACTACTGCAGAGATGAGATGAAAGATGGCGTTTGCAGATCTGAATCTGAATCTCTAGGAAGTTAGCATTTGTCGTTCGCCACCTCTGAGCTCGTCTCCGATCTGCTCTCTTTTGCTCTTCTGTGCCTCTCTCCGCCATTCCTCTATTTTTGCTTCAAATCTGCTCTCGCCGCCGCTGCTCTGCTCTCTGCT…
>Peanut_newGene_3231	Peanut_newGene_3231.1
AGCGTTTTGAAGACGTTGCACATTGCAGCATAACGTAGGCTGTGTTCGTAGAAACGCGCTATTCCCCTTCACATTCGCAGAAAACACTGCAACATTTGAGCTTCTTCCGTATACTGATTTGATTTCTGTGGGGTAGCAACTAGGGTTAGGGTTTCGGTGTTTTTCTGAAGACTAACATCGAAAATGTTCAACGGTGATCCTTCACCTCCACTCTCAACAGAGATGATCCAAAAGTACTTGGAGGAGAATAAGGAGCTGATAATGGCAACAATGGATGGTCAAAATCAGGGGAAGTTTGCTGAAGCTTCCCAATGTCTAGCGAAGCTTCAGCACAACTTGACATATCTAGCCAAACTTGCAGATGCTGCACCTCAGCCTCAGCCTCTGCCACAATCGCAG…
>Peanut_newGene_3238	Peanut_newGene_3238.1
AGATATTCAACCATTGCTTTTCCTCATTCACCATTGTTTTTCCTCATTCCACCTAGCTCTCAAATTTTATGCTCCTAATTTTGCTTCAGTTTTTTTTGTTCGTAGATCTCTTAGCCACTGTGTGCATAAATAATAGGCACCTTTTTAGAGGATGCACACCACTTCACACATGACTGAGAAATTTTGTCGAGAAGTAGAAGCCCAGGAAATAATTTACTACCACAATGGCATGTATATAATGGTGTCAGTGCAAGACAGTTTCATGAGTTTTTAAACCGCATAAACAAGGTTGAAAGAACTTAAATCTGCCTTGATGACACTTGGTAGGGAAGCAATCGTTGCTATGTTATTAGTTGAAAAGAACTGTAGCAACAAGTAACCATCCAGAGCCTTTGTACA…
>Peanut_newGene_3242	Peanut_newGene_3242.1
CTTGATTCTTCAGCACTTTTCTAAAAATCAAGATCAGATGGGTATGAGGAAGGGATTATTATTATTCAACAAGAAGCATAAAATTGAGGCGATTGTTGTGATACTAGCTATTGTTATGTGTATCATGATGTGCCAAGGGACTACAGAAGCTACAAGCAGATTAAGAAGCATGAAAAAGGAGGGTTTTAATGTGAAAGCATCATTATTATCATCAAGGTTACATAAGACTATGGAGATGGAAGATTATGGTACTCCAAGTAGCTATGAATCTCCACCAGCTGATGATTATGATTATGATTTCTACAGAAAACATGGAGATATCCCAAGCCCTGGTGCTGGTCATTGATCATCATCATCAACCATACATGTATGTGTATATATATGGTGAGGTTGTGATTA…
>Peanut_newGene_3253	Peanut_newGene_3253.1
CATCTTCCTTCTTCGTCTGATGAACGAACTAAAGAGGAATACTCAACCCCAGTTACACCTCTTGCTTACCTCCTACAATGATGGCCTCTGATTAGGTGTTCCCTGAAGAAGAAACCAACGCAGCACTCATACCACCTTTTCCTATTTATATGCACACTGCTTCTTCTGGGTCATCACATGAGAGAGGGAGCTGGCCGAGAGGAAGTGAGGAGGAGTTCTTTGTCTTCTTCTTGATTCTTCGTTGCACCATCAATAGAGGAAGGAGAGTGATAGCAAAGAATGGTGACTGACCAAAACAGAGAAGGAGCCACACCAACGTTACCTTCTTCTCCTTCCAATTCGAAAACTCTGATCATTCCTCTTGCTCCATTAGAACTCTGTTAGAACAGCTGAATCACA…
>Peanut_newGene_3257	Peanut_newGene_3257.1
GCACAAGTTCAAAGAAATGGCTCCAATTTACAGCTCTGTACGAAAAAAACCGAACTCATTTCGTTGTAAGATGAAACGAGATGAGGCTCCAATCCCAACAAGATTAAAGCTTCATCCGAGAGAAAGAGAGAGAAGAGAGAGTGTGTGTGTGTCCTTCTTAGTTATGAAGTTAGGTTTGAAGCTTTGTGTAGCACTGTGGCTTCTTCCTTCTTTGTGGTTTCTGCGAATTTGAGCTCTTCGAAAGTTTCCATCGGTTCCTCACATTATTACTTACACAAGTGGTGCAACCTTTCAAAGTTGGGATCTTCTTTCGATGAATGTTGATACTGAACATCAAATATCTCTGCTTGAGTTGAAGAATCTGATATTGACGAACATGGATGAACTTGGAAGAAAGAA…
>Peanut_newGene_3259	Peanut_newGene_3259.1
ATCTAATTCTCTTGATGGCTAACGAATCCATCACGTGCCACCTCTGAAGAATTAGACAGGATGCGTGTTCTCGGGTATCAAACCTCACATAAATAATATCCTCCAACTTCTTAGCTCAGATGCCAATCATGAATCCCAAGAGGTACAACAAATTTTGGTACCAATCAAAAAGAGAGAACTGATGGTTATAGATGATTGGGCCGATGATGATTGGAGAAAATCAATTGCTTCATATTTAAGGAATCCTAATACATAAGTTGACCAAATTTTGAAGTTACGGTCGAAGAATTTTGTACTAATGGGAGATGACTTATATAAGTATTGAGGGAAATTTTATGAGATGTCTAAGTGAATCTGAATCTATTATTGCTTTTAGTGAAATCCATAAAGGGATTTGCA…
>Peanut_newGene_3263	Peanut_newGene_3263.2
GTTATTTCAGTTCAGCCATCCTTTCTTCGTTTCGGGTTGTGCATCGATGCTTGCGTGTCGTGCTCGGAGTTTGCAACTGCTTCATTTCACTAGTTCAGTAAGTATTTATATTTCAAAAATCCCCGCGTTAGTGTTCTGTATAAGTATTAAAGCTTTTATGATATTAATGTTCTTAGGAATTGGTAACCAAGGTTACTTGTGATTTAGAGCTGTTTATGTTGCTGCGAAAATGTGTGAGGCTGTGCTTTAAATTTGCCGTTGATTTTGGGTCGAGACGAAAGGACTTCTGAGAGGTGTTTGGGTTGTGGTTTCAATTTGTTGAGGTAGGGGCCTTTTTTAGAAAACCACATTTTATGAATTAAAATTATTATATATGGATATTGACATGAGAAAATGTAT…
>Peanut_newGene_3266	Peanut_newGene_3266.6
GTGTGGCAGGGATTTGCAATTGGAATTTAAAATGTTCAACTCAACGTCACTTTGGAGTATTGAAGGATTTGAGTATAACTGGGTCGGGTTTTTAAAGCTTTTGTTTGGATCTAATATTAAAAGCTTTTTCTTTCTTTGGATTTTCAACTTGACTTTTTCTCTTTCTCTCTTCTAACATTTGGCACTCGTATTCAGCAGTATCTGGGATCTGCAATTGGATTTTGGTCTTGAAGACTAAGTATAACTGGTGATTTTTAACTGGTTATTATAATTTTTCTGTATTTTCACCTTAATCTTGTCCATTTTTCTAGTTATATTTGGCAGGAGCTGGGATTTGCATTTGGATTTTAAATGTTCAATTTAACATCTCTTTCGACTTGCTATGGGTTTTAAATAATT…
>Peanut_newGene_3269	Peanut_newGene_3269.4
AGGTATTTTGAAAGCGCTGGTGCAATGGTTTCGGTCGAGTCTATCTTTTAGCTAATCCTACTCTTCCTCTTCCTCACATTTGTGAATATTTGCTTTAATAGTCTTGTGTTGTTCTCTATGGTTCCCGATTTCAAGATTTCATCCATGATCTAGAACATTCAATATGTTTTTGCTGTGAATTACTATCTGATTCCTTTTATAGGACTGTATTCGAATTTGTGGATTGTGGATTTGCCTCAGGGAGAAGAACTACGTGATGAACGTATGAACGGGTGTTATTCTTGTTTGCTAGATTGGAATTATGATTTTCTCTACTTAGGTGTGTCAAATTCTTCTGGATGACCTGTTAGCTGAATTGAAGATCTTTTCCGATCTGGAAGTTTGGTTGAGCTCTTTTAA…
>Peanut_newGene_3270	Peanut_newGene_3270.1
AGGATAAGAGGATTTGATTTTAGTTCAACTTTTTTTGGTGGTGTTTCCTCTTTGGATGAAGTATTGGAATTTGAATCGTGAACATGCTTTTGTGCAGTTAAATGACCGAGTGTATTGGAGATTTACTTTGGGGGTTCAGGAGCAAGATTTTGTCTACACATAGTTTTCCCAACCAAACTTTGCCATTTGTTCTCACCTTGTGTTTTTGTTTGATCTGGTCTTCCATCAGTTTGACAAGCTGTTTCTTTCATTTATTTTCAGCTCTCTGCATATGCGTTTGCCATAATTGGTCACACTACCCTTAATTGGAGAATTTTGCTCAACGCCGTGAGGGGAACAGGGATTTGTATTTGGACTTGGGTATTGAAG
>Peanut_newGene_3273	Peanut_newGene_3273.3
CCTAACTCTAATTCGGTGAACCAGTTCACACTTAACTCGCAGAAATCCTAAAATCCAGTCCTCTTCTCCTTTGCCTCTTCTCCTTCGACCGGGTAGTCTCCGCCGCAGCCAGCACTGGCACCCTATTGTCTCCTTCAATGTTGAACGGACCTCACCTCTATTTCTCTTCTTCTGCCTTTGGTCTTCTCCGCTGTCGTCTTCATTGTTGCCGACTCGCTGTCACAGGTGTGGGCTTCCGGTTCTTTTGCTTTTCATTCGCCTCTGCTCGTGTTTCTTGCCTCTGGGTCACAGCCTCACAGGGTGCATTGTTTGGAGCTTTCGCCACCTCATCCAGAGTTTCCATAGCCACCTATTCCAGTTTCATTTCTCTCATTTCCAACTCCATTCTTTGCATTAATC…
>Peanut_newGene_3276	Peanut_newGene_3276.2
TTCTTCCATTGGCTCACACAATTGAGCATGAAGAGGTAAGTTATTGTTCCATATTTTGATATAACTATCTCATTTATTTTGTCTCCTTCAAGATTATAATTTAATTATTGCCTATTTTGGACATCTAAAACTACAGTTCATGGAGGTGATTAAGCTTGAAAACATGGGTTACTATAGGGATGATATGACTATACCTGGTGATGTTTTCCTCTTGCAGGTAAGAAATATATATATTTGAATATTTTTTTTATTTAAGATTATCCATAGCTAAAAAGCTTGCTAATATGGTTGCATTTGTGAGCAGCTCTGCAGTGGAGTGGATGAGAATGCAGTTGGCACAAGTGCAGAACTCATATTTGCTCCCATTGATGCATCCTTTTCTGATGATGCACCAATTTT…
>Peanut_newGene_3277	Peanut_newGene_3277.2
GTAAATGTAAATTCTCTTTAATTTGTTCTGTGTTCTTGGTAATTGATAATCAACTAACTAACTAACTTCCTCACCAGCCATGGAGTGTACCTGAAGTTTTGCGTCCACTTTATGAATCGTCAATGCTACTTGCTCAAAGAACAACCATGGCGGTAATACTCCATCCGCTTCCAAATATCCATTAATTTAGTCATAATAAAGACTCAAATGCAGTTGTTTTCATGTGAAGTTATAATTAAGAACCGCAACTGCAAGTGAGTTTCTCTCTTTAGTCATTAACAGATGGAATTTTGCTTAACTGGTTTGTAATCATGCAGGCTTTACGGCATTTAAGGCAGATATCTCAAGAAGTTTCTCAGCCAAGTGTGTCAGGATGGGGAAGAAGGCCTGCGGCTCTAC…
>Peanut_newGene_3280	Peanut_newGene_3280.2
AGAAAAGCAACAGCCGAACCAGCTCAAAAGTTTTGATTATTATTTGTGTGTGATATTTGGGGGTAGTAGATCAGAGCACCCCACCCCCACCCCATCTCTCTTATAATAAGCAATAAGCTACCCCATTCATGTGGTGTATGTCACAATCCCAATATACCCTCTCTCTCTCTCTCTCTCTCTCTCCCTTTCAAATTAAAGAATGTTATGAGAAACCACAATAAACTCTAGTCTGATAAGTGAATAGTATAGTAGTAGTAGTAGTGGTGGTTTTGGTCTTCCATCTGATGCGATTCTGGAGGTGTTTAAAGAGAAAGGAGTAAGCAAGGGATAAAGGAAGGTAGGTAGGGAGGGAGGGAGGGAGAGATGATGGCGGTGAGTTCGGGGAGCAAAGAAGGAGGA…
>Peanut_newGene_3289	Peanut_newGene_3289.1
CACAAACTCATCTTCTCACACTTCCATTCCATTCCTTACACTCCTCTTCATTCTTCATCACCTCCGATCCCTCCTTAATTAATGTAGTAATAATATATATGCACTATTCTCCCATGAAAATCATCCCTCTCATACAAGATCAACAACGTAACCCAAGAGCCCTTCTTTAATTTATTTATTATTATGGCTTTTTCTTCTCTGCACATCTGCATGGACTCACCAGATCACTGGTTCCAGGGAACAGTTCACGACGAGGTCTCCGGCGGCAGCGGCAGCGGTGGCATGGATTCTTCTGGCTCGCCATTATCCTCCTCCGGCGACATTATGAAATGCTCGGCAAGGCCAATGATGGAGAGAAGAATGAGACCCCCACACGACCAAGCCCTCAAGTGCCCCCGC…
>Peanut_newGene_3292	Peanut_newGene_3292.2
ATTTTTTAAAATCTCATCTTCGGTTATCTTTATCAATATATACGTTCCTATACAACTCCCCCCTTTCTTTCTTATTCAAAGATATGCAGACATAAACTTATCGAATGGCAGCATTCTAATCGGACTAACTCTCGAACTGAGATTGATTCTCTTCAAGCTCAACTAGAAGTCTTCCGAGCTGGTGGAATGCATGGAGTAGAGGTGATTTCGGATTTAAAAAACAGATTAGAGAGTCTTGCAAGAAGAAAAATCCTACTGGTGTGGAGTACTTGGTTGTTTGCTCTTGAGAGGCTTTGGGCAATGCCAGGTTCACTAAAGGAGCACTTTCAAAGTTGGACAACTGGTCCAGTGAGGAAGGATGAGAGGAAGTGATGCTTCATTGGTTTCTTTGCTGTTATT…
>Peanut_newGene_3295	Peanut_newGene_3295.1
TGAGAGAAGCTCTGCTGCTAATTGCTTCTAATCATTTGGTTTCTGACTAAATTTTATTTCTAAGGGTCTTATTTAAACCAAAGAAAATATGGCTGCTGCTATTGTGGGAGGGGCATTACTCTCTGCTTCTGTTCAGGTGGTGTTGGATAAGATCATTTCCAATGAGTTCTTGGACTTCTTTAGGAGAAGGAAGCTTAATGTTTCACTTCTTGGAAAGATGAAGATGACATTGCTGAGTGTTCAAGCTGTTCTAAATGATGCCGAAGAGAAGCAGATCACAAATCCTGCTGTCAAGGAATGGCTGAATGAGCTCACACAAGCTGTCTTTGATGCTGAAGATTTGTTGGATGAAATCAACACTGAGGCTCTTGGATGCAAAGTGAAAGCCAGGTATCAAAG…
>Peanut_newGene_3298	Peanut_newGene_3298.1
CCACCATCACTTCCTGTTACCATCGAGGCTCGCGTCGCTGTCACTCATGGCCGTCGCTCCTACTGTGCTCCATTCGGGTTCTGGGTTGAGCGCGCCGCTGTCACCGTTGGAAGCCGTTGCTGAGGCCGGGTTGCTATGGTGGTTGCTGCCCTTGTCAGTAGCGGGAAAGGATGAGACGCGATGATGGTGGGTGGTTCCCTCGCCCTTGCTGCCGTGCCGTCAGAATCTGCCGCCATGGCCGTCGGAGCTCCGGGCTGAGTTTCTGCCACTTGAGATCCTGCCGCCATCGTGTTCCACCGCCGTTACCGTCACTGGTGTTTTTGCTCGCAATTGTCACTTGGGTTTACTGACGGAGCCACTGCCGGGTTGATAAGGAGCTGCGGCTGCTTCATTTTGTTA…
>Peanut_newGene_3301	Peanut_newGene_3301.1
CTTGAAGAATACACTACCGAGAATCCGAAGATAATGACAAAATGCTCTCACCATTTTCATCTCGGTTGCATTTATGAGTGGATGGAGAGAAGTGACAACTGTCCAGTTTGTGGAAAGGTGATGGTATTCGATGAAACGACATACTCTTGACTAGAAAGTATGTCTTGTGGATGAAGCCAGCAACAGAAGAGAGAAAAGGAAGAATATATATATATAAACATTGTGAATATACTGCTGATTTAAGTGCTTGTCATGTATAGTAAGTATGAAAATTTTTTTTATTAACCATTGTTGTGAGTTCATTGTCATCCAACTTGTTTTCATATTTAAAGTATTCCCACTTGACCTAAACACTTGAAGTAAAGAAGAAAACTGCAGTTTCATCAGATGGAAGCTATG…
>Peanut_newGene_3306	Peanut_newGene_3306.1
TCACATATTAGTAAAATTGTTTTATATTAAGAATTTTTTAATATATTTGTTATATATTTGTGTCTCACATGCTAAGTTAAAAAATTTAAATATTTTATTTAGTAAATATATAACAAATATATTAAAAATTTCTTATTACTAAGAATTTTACTAACAAGTGAGCTAAAACCCTGAACCCTGATTTCAAAAGTGAAAGCTCTAATCTCTGACTCTTAGGCCCAAATCGAGATCAGAACCGCGCTCCTCTGTCTTTTACTCCCGTCATTCCCAATCTGAGAGCAGAAGTAACGGTGGTGCTCTTCGTTTCCGTTTCCGTTTCCGCTTGCGAATATGACTAAGTTCCGGAAACTAGGTCGACCCACGGGTCACCGAATGTCCATGCTCAGAACCATGGTCTCC…
>Peanut_newGene_3309	Peanut_newGene_3309.1
TGCATGAGAAGTTACTTCACCAGCACCTTGTATAAGTGGATTACTACTGTCTGTTCTGTGATGAATTACTTCTTTCTCTCTGATATTGTGGTACTGATTGATACCGGATGATGCTTACTTTTGGTGCTTGTGTTACAGGCTAAGTTTTGGAGGCAGTATGTGGAGGCACATATGGCTGTAAATAATGACGAAGCTGTCAAGCAAATTTTTAGTCGGTGTTTGTTGAATTGCCTTCAGATTCCTCTCTGGCGCTGTTACATTAGATTCATTAGAAAGGTCAATGACAAGAAGGGCATGGAAGGTCAAGAAGAAACAAGAAAAGCATTTGATTTTATGCTAAATTATGTTGGAGCTGACATAGCATCTGGCCCTGTGTGGATGGAGTATATATCTTTCCTG…
>Peanut_newGene_3310	Peanut_newGene_3310.1
TCGCACCACCGCACTGATGCTAATGTCTCTGCAACATCACACAAAGAGCCTGTACGGCTCTACCCTTCGCCACCAGCCCAACACCTCCGCCGGCGGATCCACCATCTCTGCTCACCGCCGCGCCACCTACCTTTTCAGGTCCGAAGGACCGCCATCTCCATACATCCTGTGATTTATCGTTAACCCACTCTTCAAGTTAATCCTCCTCTTCCTCTCTCGAATTATTCTCTCATCTTCCTTATTTCTCGTCGATTTCAAAAACCACCTCTTCTCGCCGGTTTTATCTGTTGAACACGATGAATGCTTGATTTCCACTGTCTTCTCTTCTAGCCTGAAACATGGAAAAACCCAGTGGAG
>Peanut_newGene_3311	Peanut_newGene_3311.1
TGGCCTCAACAGTCACCGCCGAACGTCGTCGTCACTCTCCGCGGCGTTCGTCACTCTCCCGGCCGTCACTGCTTCTCCCCTCACCTCGCCGTGTTCGTTGTTATATTGGTCATTTGTGGGTTGTGCTTCTTCTGCTTCTACTTCGTTGCTTTTGCTTCTGTGGTTTGTGGGTGCCTCACATCGCCAAACCCTCATCAGACGAGGTCACTCTCTGCGGCGTCGTTACTTCTCCCGGGCGTCACTGCTTCTCCCCTCACCTCGCCGTCAGAAAGCTCAGCAACAATTCCTCTTCTGCCTTAGTGCCTCTGCTCCCTCAGAGAAGGAGGCCAGGTCGACAGAGAAAATAAGAGGAATAAGGCTACAGCGGTGATAGAGGCCACTGCCGATGTTGGATCCGCA…
>Peanut_newGene_3312	Peanut_newGene_3312.1
AATAACTTAACTAATTAACATACAGGGTATCCTACTACGGATCCATATCCTCCTCCACCAGCCGGACAAGGGTATCAAGGATACTTCCACGGAATAGGAGGAGTAGGAGGCTTTCCTCCACCACCATCTGCACCGCCACCGCCTCCGCCTCTTCGGCCTTATAACCAATACCCGGACAACTATGGTAGTCGTTGTCCATCTCTTCTCAGAACCTGTTTGGCTGCTCTTTGTTGCTGTTGCATTTTGGAAGAATGGTGCATATAGAGTAGACACAGTTGGAACCAATGCAAGTGAATATTCAGAC
>Peanut_newGene_3318	Peanut_newGene_3318.1
TGGAATTGTTAAAACTAAAGCATGGATGTTTTGTGACTTTTAAATATAATGGGAAATCGAAATTTGAACTCATAGTGTTTCATCCGAATACTTTAGAAATTGATTACTCAAGTGTGAGAGGTTTCTATAACGATGATCATCATCAAGGTGCAAATGAAAATGATGATGATGGTGGTGATGATGATGATGACTCTATTGAGATTATTGCTGAAGAGCCAGAACAATTCAACAACAGAAGCAGAGAAGGAACTTGTAAAAGCATGCTCAAAGAAGTTCATGAAAATCATGACTATATTGTAATTGA
>Peanut_newGene_3324	Peanut_newGene_3324.1
CTTCTGAATCCCCAATTTCCCAGAACCCTAAAATTTCTCTCTCAATTTCACAACCCAACTGTCCCAATTAACAGTTGTCCCAACTTCCTCTTATCCTCAAAATTCCATATTCTCTGTTTTTTGGTGACTAAAAAAGTAAAAACCCTTCTTTTTAAATTATTATTATTATTATTATTCCCAAATCGAACCAAACAAAATTTCAAAAAATAAACCCTCCAAAAATAGAAAAGACAAAGCCAAAAAAATAAAAATGGCATCTAAGACGCTTCTTCCGATATCTATGAAGAACAAAAGGGGTGCAATTGCTTTGGATCATTCACCTCCATTTTCCATTTCTTCAATTCCAAGTCGCACTCATTCTTCTTCTTCTTCTTCTTCTTCATCTGTTAATGCAACAAC…
>Peanut_newGene_3329	Peanut_newGene_3329.1
CAAAATCTTGTGAAATGTATATATTTGAGATTTTGAAGATTTAACTAAAAATACAGAGAGAAGAAGGAGTATCAGAATTATTGCTCTAGAAGAGAAGAAGAAAGAAGAAAAAGAAAGAAAGATGGCACTGGTATTAGAAAAAAGGAACAATTCTCACAACAAAGGTAAAGGAATTATAATCAATGAAGGGAATGACATGAATTCAAGTGATGATGATGATGACGACGACGAGCAGAGTGTTCTATTTAAGGAAGTACAACCGGTACATATAGGAAG
>Peanut_newGene_3333	Peanut_newGene_3333.2
CGAACATTCTAGAAAACCTAGCCTTCTATAATTTCCCCCAATTTCCATTTCTTCTCTTTCTCTCTCTCTTGATTTCCCAATCAACGCAACAAACCAAACCCTTACCAAAATTTTCAACCCTTTCTTTAGCTTTTCCCTTTCAGTTTTTTAAGCATGGCATCGAAACGCATCTTGAAGGAGCTCAAAGATTTGCAGAAGGACCCTCCTACGTCATGCAGCGCTGGTCCTGTGGCTGAGGACATGTTTCACTGGCAAGCAACAATCATGGGACCAGCTGATAGCCCATATACTGGCGGTGTTTTCCTTGTTTCGATTCATTTTCCTCCGGACTATCCATTCAAGCCACCAAAGGTTGCATTTAGGACCAAGGTATTCCACCCAAATATCAACAGTAATGGA…
>Peanut_newGene_3334	Peanut_newGene_3334.1
TCAGCACAAAGGTTGGCTTCTCTATTAGTGTGCAGGATCACAATCTCCCAAGATTTTTCTTCATTTGAATTATTTCCTTCATTATCAAACTGTGACAGAGGAACTCCTCTTCTAGCTCCCTCACTACGTTCCAAACTTCAATCGAGTCCATCTTTACATGCCCCCACATCCAGCTCTGTTGCCTCCATCTTTAACGGATCCGTCGACATTAAGCTTCACCCATCCTATTGGAGGTTTTCTCCAACCCAACTTTCTCGAATCTGGCTTCTTCCTCTCAGTACAAATGTAGTACTTCTGATGCAGTAAAAAAGGATGGCAGAGCACATAGTTGTACAATTCCGGGCCAAAGGATTGTCGCCGTTGGATAGTCTCGCACAGCGTGCAGGATGGTTTCTTCCA…
>Peanut_newGene_3340	Peanut_newGene_3340.1
CCCAATCCGTTCCGCCACCACCGAACTGTTGAGCCCAGAGAAGAGAGTCGCTGTTGTTCTGTCGAGAAGAGAAAGCTCGCACAGAGAGGGAGAGCTCACAAAGGAGGGGTTACTGCCCAGAGTCGCCGCCGTTCGTGTCTTGCCGTCGCCGTTCTGCCTTCCATCAAGCTCGAACAGTCACTGTTCGTGGAGCTTACCGCCGTCGCCGTTCAAGCTGCTGCTGCCGCCGTCACACGCGACGTCCCGAAGTTTTTCTCACCGCCGTCAACGCCGATCTGAGCAGAGGAGAATAGGAAGAACGACGGAAAAAGAAGGGAGTCATCCGCATCACCACCGTCAAGCCACATTCACAGCCAGCGAAGCTTCTGTTGTCGTCGTTGCAGAAAAGGGGTTGCCGTC…
>Peanut_newGene_3342	Peanut_newGene_3342.2
CACAGATTCACTCTCTTTCAAAGTACCTCATAGTTTTCCATGCTTCATAAGCCATTAAAGGCATTGAACCAATGACCACTCCAACCATGGAGAAATCAGAAATAAAACTTTACATATGTTGGTTGTTCACTTTATATATGTTGTGTTTTATATTCATATCATCTTTCTTACTATATATTCTTTTCAAATTGGATTTTTTCCCAACAAAACTAGACATAAGAGTACAATAAGACTAGACCTAAGTGAAGAGTATGATTAGTGTCAGAATCTTTGCTGATGACAGTTGGCAGTAGGCACTAACTGTTGCTAACAGACATGGTAACTGCCTAAGGGTCAAAAGACTTGTATAGCAAGCCATCCACCTTCTATATATATGTATATCATAAGTGATCTATCTCT…
>Peanut_newGene_3345	Peanut_newGene_3345.1
CAAATTTGTAATGGATTATGAGTCAAATTTAAATTATAAATATTTGTATGGACACACATGATAAATAAACCTTGACTGTCCTGATATTATGATTGCTGGTTTACCTTTTCAACAGTATTTGAGGAGAGATCTCTCATTCTTACTCTTCTTTCATATGAACACTCAAATGCTTTATACATCTATATATATCACCTTTTGGCCTCTCATGAATCATTCAAGTTCTCTATGTGAGTCAAATTTGTAATGGATTGTGAGTCAAATTTGAATTATAAATATCTAATGGACACATGATAAATGAACTTTGATTATCCTGAAATTATGACTGCTAGTTAACCTTTTCAGCAGTATTTGAGGAGAGATCTCTCATTCTTACTCTTCTTTTATGTCAACGCTCAAGTG…
>Peanut_newGene_3347	Peanut_newGene_3347.1
AATTAAGGCCTCGTCCACTATACTAGCCACTTATAACTTTGAGCTTCCACTACTACCTCTTATATATTATGTATCTTTCTAGCTAGCTACCTCTCATAAGAGGAATTCTAATTCATTCATTAAGTTTACAATAATCAGTAGTCCTCATTTCTCTCTCTCACCCATTTTTTCCTTCTCCTTTCTCCTTATCAAGTATAGTACAAAGCTCCATGTCTGTCTCAACTATTCCAGCACCAAAATTAGGGGAGAGATTGTGTGAAAATGGATTTGAACATCCCAAAATTCTTCCTGCCATTGATGATGCCCATGGAGGAGTTATTGTTGACTTGAATGAACCTATGGATCCAGAACATTTTGCTACATTGCTTAGGTCTTCACTTCTACATTGGAACCTTAAGG…
>Peanut_newGene_3353	Peanut_newGene_3353.1
CTACCATGTAAGAAAAATATGATCACCCCAATAACCCCATTAGGTTAGTATTAATATATAAGCTATAATATTCTTATATTGATGTAAATCAAGTTGGGATCATTGAAGCATAAGTTTCTAATTTCTTTCCGCATGTTCATGATGGACAAACACAATTTAGCAACATTATTAGTGACATTAATTTTGGGGCTAGCTTTGATCCAAATAGAAGGAAGTTCAATGGCAAACACATTGAACCAAAATGACATCACGAGTGTCTCATCATCACCATGGCTAAAGAAAGTTGTGAAAAGAAGGCATAGTTATTATGGTGGGTGTCGCATGAGACCATGGGTATGCAACAACAATGGAGAGTTTCCACCAAGAAGCACGTGCTGTGGAAACCGTTGTGTGAATGTG…
>Peanut_newGene_3364	Peanut_newGene_3364.16
AAAACACAGCAGAAGTAACAAAATATTACCATATTGTCCTCATTATGACTTTTGTTAAAAGAAAAACAGGATTGTGGAGAGATAAGAATACTTTCTACATATATCTTTATTCCTTCTCCATCACTCAGAGAAATGGATTTTGGAAGATTCTTACCATCTTTCCTGTCTTCCTCCTCCCTTTGAAGCCTTCTATTTTTTACTAAGAGGAACGTTAGTGGCGAAAAAAAAAGGAGCCATCTCATGTTTTGGTTTCTTTAATTTTCTACTAGCTCTACCTTGAGATGTTTTCCATATAAGTTGATACATAAGGGTCTTAAGTTCTCAAACACTTAATTTGATAAAACCTTCATTAGTCATGGATCTTTACTTGATTTTGATTTCCAATATGCTTATAAACTA…
>Peanut_newGene_3368	Peanut_newGene_3368.1
GCGAAACATGACATGACAAATACTGTTGTTGCTGGGTGTGTTACTGGAGGTTCAATATCAGCAAAAGAATGCTTTGGTGTTGCTTTATGATTGTAGGTGGTCCAAAAGCAGCATGTGCTGGTTGTGCTGGTTTTGCGGCATTCTCAGTCGTTATAGACAAGTTCTCAGACAGGCATGAGTAGCTACCTATTGAATTGAAGTCACCCAATTTTGCATTCATTAAGCATAGCATGGATTTTCATAGTGATAATCTTTTGCCCATTTGCTAAAGGGCACACACAAAATTGTAGTATTTTATTTTACATCGATTATTGCTTATTTGTATATAATATCAATTGGTGGATGCATTCCTCCAATTCCAAACTAGATGTAAGTATGCTCTTAAGTATTAATGTAAAG…
>Peanut_newGene_3372	Peanut_newGene_3372.1
TAATCCTCGAGGCTTTACGCAGGCAGCGACACGTCAAGAGCTGAGGCCTGAGGACAATGCTCTGAAGAATCTGCTTTTGTTGATTGGTTTACTTGTACTTATCACCGTCATTTTTGTGTTGTAATGGATGTTTAGCTGCAGATCTTCTGTCTTAATCGATATATCGTCCGAGCGTGTGTGCGCTTTTGTGTGTGTATACATGTTCGACGGTTTAGAACAAAGGATTTTATGCGCGAGAATGCTGCCCCATTGGGTTCTTTGTTGAATGTGTCAAAACTAAACGAGAATGTTCAATTTGTGTAAATGCTTATTGCAAGTGTTCCAGCATGTTTGCTGCTAATGCGCTCTCTTTTGTGTACTCCCTTTGGGACCTTGTTCTTGTGTGCGTCATGCATGTAT…
>Peanut_newGene_3375	Peanut_newGene_3375.1
AAAGAAATGACTCAAATAAAGGATTCAGAAAAACCAAAGAAAGACGTGTTAGAGAAGAGAGCCTAACCTCACCGCCAAGCTCACCGTAGCGGTCGCTGCCGCCATCGCTGCTACAGTTCAGATCAAGCAACTGTGCTCTTTGACTCAGATCCTTCTATCCCTTTCTATGTTGTTCAGAGAAGAGAAAGGCTCATGCCTATAGCTTTCTATCTTTCTCTCTCATTTTCGATTTAGGGCTCACGAACTCGCTCTGACTCAGATCCTTCTTGCAGCTCCGATCTGCTCCTTCAGTGCTCATCAAAGATGGCTGGCGGTGGTTTTCAATGAAGTTGGGTACTAGTGAAGTTGCTTGGACTCTGATCTATTTTATGAATATTTGATTACACCATCATGCCATTT…
>Peanut_newGene_3377	Peanut_newGene_3377.2
AACGCAGGTTCCCCACTTCCCCTTCTCCTCATTCAGAATTTCAGATGCAGCCCCCCACCCCCCAAAACACAAAGCCTAGGTTACTCCTCCACCGCCGCAAGAGTCTTACTCAGCGCCGCCGTCCGTTGCGCTCAGACACCACTGTGTCTCCGTCCGGTCGTCCGCGGCTCCGCGCGTCTTCCTCTATCCCAAAACACAACCTAAGCTTACAGTAATCTCCCCCACCGCCGCAAGGAGTGAGACTCAGCGCTGCCGTCGCATCTGCTCGAAGCCGCCGCCGTCCCCACTGGGCTCGTCTACGCCACTGCTCGAAGGCGTGGTCCCCACTGCAACTCGTTGCGTGGTTCCTCCGTCGCCCAGCCGCTGTTCCGCCGCGCCGGCACTGTTCCACCGCGCTCC…
>Peanut_newGene_3379	Peanut_newGene_3379.7
AAACATTAACCCTAAACCTTCAGAGAATCAGAGTTCAGAGTGAGGCTTCTTCTTCTTCTTCTCCAACACCTGAGAGTAGAGACCAGAGACAGAGTCACCGTAAAGGAGAGACAGAAAGCAGATCAGCAAAATTTCGTCTTCTCCGATGTTTGAGAAAACCCGCCGTCTTCTGCCGGAGAGTAGAACTTCTTCTTCTTTGCCGAGCCCGCTGCTGCGGCATCCTCTTCATGTAAGTTTCTTTCTTTCTCTTTGATTATTATATTTATTTTTGCAGTTGTTGTATATACTATTTTCATCATGAAATTCTAAGTTTGTGTTTGTTAATAACAATTGCATTAATATTATTGAAACCTAGTTATCATAATCAATATTACTGAAACCTAGTTGTTATAGGTCTTC…
>Peanut_newGene_3381	Peanut_newGene_3381.2
TTTGAAACAAAACCTAAATTTCCCTTTTTTTTCAACACGAGAGACTGCGTTAGCTCAGAGAGAAAGAGAGCTTCTACATCGAGAATTTCGTTCACCATCCACTGTCATCGGCTTCAAACAAAACCGCCATTTTCGCCGTTGTTTCCGCTGCCATTTCCGCCGCCGGCACCATTACCACTGCTGTGTCCGTTGCGGTAGAGAGCTTCTGGATCGAGAGCTTCTGAATTTAAGAAGGGAAGTTTCGAAGAAGCTTAGAATTCAACAATCTATCATACTCAGCATACTTGAGATTCCTTTTTGTTAGTTATTATACTAAAGCTTTTGTTCTTTTTCATAGTTATATAATCCTAAATTTTTATTTTTTATTTTTATAATAATTCCCTTTTGGAGTTTGAACCT…
>Peanut_newGene_3389	Peanut_newGene_3389.1
CGGGATCGAGACTATTTCGCACCCTTGCCCACCCCGCCTCTAAAATTTGTGTTCTTCTCGTCATGTGGTGTTCTTCGAGGAGGAAATCTTTTTCATCGAAATTGCCACACATACATACACAGAGACACATACTTCACATTTGAGACAGAAAATCAAAAAAGAAGAAACAAAAGAAAAGAAAATCTTCGCAGAAAATTATGGCTTCAAAGGAGACCCAAGACTTCTAGCCATTTCTCAAACCATCAGAGTGGTTCCTCACTTCCCCAAATAAGATAAATGAGCAATATATTCGTACATCCGTTGTGATAGATCTTTTGTTGGGGATGTGCAATGACCAGAAATACGAGTTTCAGAAGAAGATTAATGATTTCTGGGCTACTCTTTAAAGTGAATAGCATG…
>Peanut_newGene_3390	Peanut_newGene_3390.3
GAAAGAGAAAAAAGTAATGTTTGGGTGTCTTCTTCCTAGCATTAGCATCATTACTCTGTTCTTCAAACTGTCCAACAATTTTGAAATTCTGAAGTATTCTTTCTTACTAATTCAACAACGCGTTGGCCATCGAAGTTATTACCCTCGAAGATGAACTTATTTTGGGCTTCCAAATTTTCAGTTCAAAACTCAGGGGCTTCAATTCCAGAGTTCAGCCATACACCTCGGGATTGCATGCAACTAATCAAGCAATGTTGGATACATTTATCAACTTGGTTACATCTTTGGCAGATTGGAAAAATCGTAGATATTCGTTCATGAATTCTTTGACCCACTAGTAATCTTTTATGCATTACTTTTCACAAGAAAATTCTGAGTTTGGGTTGTACTTTCAAGTCC…
>Peanut_newGene_3401	Peanut_newGene_3401.1
TGAAAGAAAAGAAGCATTTGGTCTGCTAGGGTTTTTGTCCCTCTTTCAATCACTGCCATTCTCTCATCCTCTCCCTCTGCTGTATTTCTCGTTCGCTTATTCTCGCTGCCACAACATGCCTCAGACGATGCCACAACCTACTTTCATCGCCGCCACGCAACACACTGTCGCCGCTGCCTCAACACACTTCTGAGTGAAATAGATACCTGACTGATTCTCTTAGTACGGTGCTTTGTCTCTGCCCCTGCGAACTACTCAAGTTTCATTTTAATCATAATTTCAAAGATGAAAGAGAAGTCTCTGCTAGGGCTTTTCCACTAATGTTCATGTTCTTGACCCATCTCTGCAGCTACCACTGTCACTTTCGCTGCCTGCAATCAGCACCGCCACTATTCCTTC…
>Peanut_newGene_3408	Peanut_newGene_3408.1
AAATAATAGTTAAAAATACCTTTTTAAACGATAAAAAATGTCATTTTTATTCAGTAAAAATAGTCGTTTATGAATGTCATTTTAAACAACATGAAATACCATTTTAACTTAGTAAAAATGTCGGTTTCAAACGTCGTTTTAACTAATTAAAAACGTTATTTTGTCCGGAAATAATGGCGGTTTGAACTGCCGTTTTAATAAAAAAAAATGCCGTTTTATCTGGAAATAACGGCGGTTTGAACTGCCGTTTTAACCAACATAAAAACGCTATTTTATTTGAAAATAATGGTGGTTTGAACCGCCGTTTTAACCACCCAAAAAATGCCGTTTTATCCAGAAAAAAATGGCAGTTTAAACAACCGTTTTAACATGTTAAAAAACCGCCGTAATAACTAAATG…
>Peanut_newGene_3409	Peanut_newGene_3409.1
ATTAGTATTGTTGCATATGAGAAAATGAGGATGAGTGTCAATGACGAACCCTAATTTCTTGCCATTGTTCATCTTTCTGATTTGTCATTCAACTCCTCGCTATCGCTCATCCCTTTGTTGCAGCTCATCTCCTCGCTGCTGCAAGCAACGCCGTTGTTGCTGCCTTCAGTGAACTTCTATGATTTGGCTTTGATCTGAAGATTTGTTAGCGTTCGTCTCATCACGATCGTTCATCTCCTCGCCATTGCAAGAAACACCGTTGTCGCCTTCAGTGAGCTTCAACGATTTGACTTCGATATGAAGATCGCCGCTCATCTCATCGCCATCATTCAGCTCTGCACCATCGCAAGCAACACCGTTGTCGCTGCCTTCTATGATCTGATTTTCAATCTGGCTCAC…
>Peanut_newGene_3418	Peanut_newGene_3418.2
GGAGAGGGAGAGTCCGAACCAAAGGGAGCCAGAGGATGAGAAGGAGAGGAGAGGGGAAGGGAAGGAAGAGGCGTTGCCGGTGATGAACACAGCCACCGTCACCGCTGTCTGACCGCCACACCATCAAACCCTAGCCGTCATAGAGGAGAGGGTGATCGAAGTAGAGAAGCACCGCGTGAAGGAGGGAAGTTCCATCGCCGGCGCTGCTGTTAGTGGAAGCCGCTACCACCGCAGCGGGGAAAACGAAAATGGGAGAAGAGGTTTCGTTGATGTTGTCATAGAGGAAGAGGACGAGACGTGTGTGAGAGAGTGACGCACCGAGGAGGGACCATTCCTCTGCCGAGGCCGCCGCCGGAATTTCTGGTTGCCGCCATGATTAATGGTGAGTCAGTTAAACCC…
>Peanut_newGene_3419	Peanut_newGene_3419.1
GTAGGGGGGAGGTTTCCTGGAGTTTCGGCTTCGAGCATGAGGGCCCGGTTTAAAATGAAAAATTTTGAAGGGTCTTCTTCAAACGCCGAGAAGGTAGAGGGTGAGGTTGAGGTTAACCAACCGGCACAGAAGAAAAAGGGTATTGTTTTTAAGAAGAGAAAATCTGAGGTGATTAATCTGGAGGAAGGGGAAAAAGCGGTACCGTTGAGTGAGTTATCGAATTTTACTGTTAAACAAGAAAAGCTGCATTCTTTCGAAGAAGAGGGTGATGGCTCGTCTGTGTGGGATAAAAAGTTCCCTTTCAATGTCTTGGCAGATGAGATTGTTCAATCTGCTCCCGACGTTGCTCGCATTGAGGAAGTTGGGGATGTTGGGATAGATCAATTCATGCAGGTTCTA…
>Peanut_newGene_3420	Peanut_newGene_3420.1
CCCTAACCCTATTACCCAATTCACCTACACGTATAACCCCTACCACCTGTGCATTCTTCTATTAGCCACGCTCACACTCCCTCATGACTCACTTACCACCGCCAACCTCTACACACAATACAACTTCAGCAAACAAAATGGAAAAGAAAAGAAGAGAAATCAGAGGAAGAGAAATGAGAGATGGAGATCCAGAGAGTGAGGGAACCGCGAGGAAGAAGAGAAGGAGAAGGGCGTGGCGTTGGCGGCTGGGTACCGCCGCCGTTCAACTCTTCGTCGCACCGTCCACGTCGAGCTCGTCCCATCACTGTCATGTCACGAAGGAAGGGTCGCCGCCGTTCGTGCCTTGCCGTCACCATTCGCGGAGGGAGAGGAAGCAAATGCGCCAGAGGAGCTGTTGTC…
>Peanut_newGene_3428	Peanut_newGene_3428.1
AATCTGGCTTCCACCACCAACATTCCACGAAGGAGCAGCGGCACCACCACCACCAAACAAAAGATCACATATAACTATGCACTACACTACACTCCACCACGACCACTACCTTCTTCTTCAAACACAAATTAACAACTAGTAGTTAACATAGCACTACACCCCGCCCCTTCCCCCGGCGGGTCTTCTCTCTCTCTCTCTCTCTCGTGAGTTAGTTATGGGAAACCCAAACCCTAACCAGGAGGAAGAGAAGACCCTTCAAGAAGAGCTTTCAGGTCCCATCATGCTCGGCGACCGAGTCATCAAACTCGCTCAGGAGTCCGACTCATCCAAAGTCGACTGCGCCGAACTCGCCAAGAAGGTTCAGCTCCTCTGCGACAACCTCCGCTCCGTCGTCCGTGC…
>Peanut_newGene_3435	Peanut_newGene_3435.1
TTACAAATCCTAACCCTAACCCCCTCCCCCCCTTTCCCTTTTAACCTAACACACACACAACATAGAAAACAGAGGAAAGAGAGAAGGCTTGAGGGAGAGCTGCGCCAGGAGAAGGAAGATAGGAGAAGGGGGGATGTCGCCGACGGAAAAGGAGATTGCTGCCGCCGTCACATGCCTCGCCGTTGCCGTCGTTTTCGCCGGGAGAAGATGCGTGGAGAGAAGAGACGTGGGCCAGGCTAGAGATCGCCGAGGGGGAGAGAGCTGCCATCGCGTTTGCTGCAGGCTCGCCATCGTGGAGCCGCGAGGAGGCCGTCACTGGTGCGAGCTCGTGAAGGGAGAGAGGGAGCCTGCGAAGCCGCTGCTGAGCCGCCTTTGATGCGAGGAACAGAACACGCGAGA…
>Peanut_newGene_3449	Peanut_newGene_3449.8
CGACGCCGCTTCTCACCGATTCGCTTCTAATCCTTCATCATCGGCGCCTTTCGCCCCTTCACCGCCGTTCCCGAAGCTCCATCACACCCCTTCCCCAATCTCTCTCTTTCAGTTTCAATGCCGATGAATTTCGCTACCTTCTCCACGCCGTTTTCTGTCGTTGCTCGTTAAAGCTCGTCAGCGTCGTCGCCGCCGCTGCTACCTCTTCTTCTCGTCGCCGTTGGTTCAGGTAGGTTCCGTCGTTCCTTCAGATTACATTGATTTTCTTGCAATTGTATTTGTTCTGTTCTCAAAACAAATTTAGGGTTTTATTACAGTGACAGATATGGCAAGCTTTCTGTGAACGAACTCCCTTCATTCTTCTCTTCTTTGTTTCTTCCCTATGACTGTGTAACCCTT…
>Peanut_newGene_3452	Peanut_newGene_3452.1
ATAAAAACTAAATAATCTTTGATACTTGCAGATAATGCCTTTGATTGGATTGTCATAAATCTTTTTCAATAGTTACTTTGTCATTTCTTGCAAGTTGAAAAATGAAGTTTCTCTGATTGGTAAAGATTAGGGTTGATTCGGCTCTAGTTGTGGCTTCTATGGAATTGTTCACGATCAAATCTGGCTTGTGTTTTTTGTAGAGACTTTGCAAAAGGAAATGATGAAGCTGTGTTTGGTTGAGGATGTGTTTGGTTGTTGTCCAAGGTTAGTGGGCAAAGTAACGCGGTGGGACAAAAGACTCTTGGCTGCTCGGACAGGATGGGCATGGATTGAGAGGGAAGAACTGGTCTCATTCTTTTTTGTTGTGTTTGATTGACAGCATCACTCTCTGAGCTAGTA…
>Peanut_newGene_3453	Peanut_newGene_3453.1
AACACTACTGCCATCCCTTCCTCCTTTTTCATTTCTCAATTTCAGTGCTTCCCACCGGATCACCCCATTTTGTCGATGCCACTCCCCTCTTCGGCGTCGAGTTCGCCTCCAACGAGAAGGCCTTCACCATTTCTCCATTGCTTCGAATACGTAGCTGTAATCATAAAATTTACAATACTGACTAAGACCAAGTCCTTTTGACACGAATCACCATTAGCAAAATCTATTCAATAAGGATGCATACCTTGGCAAGGTGATAAATCTCAATTTTGTGGTTTATCTTGTGTTAATTTTAGTGGATTTTATCATCTTTTCTCACATTTATTCAATTAAATAGCATGGTTTTGTAATTCTCCCTTAATTTATACTTAAGTGTAAAAACATGCTTTTTAGGCCTTT…
>Peanut_newGene_3455	Peanut_newGene_3455.1
AAATGTATAACTATGATGATAGGGTGAAGTGGATGCTGTTTTTGTTAATGCTATACTAGCTGTGTGGGGTTCAGCAACGGAATCTTGAGGCAAGTTCTAGCTGTGTGATCCCCCAAGAAGTCAGTGCTCACCGCCTCACCCACCCAGGCTCTACCATCATCTTCTAATTGCTTCTCACTGCTCACCCAGCACCACCAGCGTCTGCTGTCTTTGCCGCCGCTCCTCTGTTTTACAGCCTCTGAGCTGCGAACTCCATCGCCGCTTCCTGAGGCTATCTTCAACAGGTAATGTGAAGTCTTTGCTTTGTGAAATAGCCTACATGGCCTCTTGGTGACGAACAACTCTAGAACATTAGTTTAATTTGTAGCCTCTCTTTCTCTGAAAAAGTTGAGCACATTG…
>Peanut_newGene_3457	Peanut_newGene_3457.3
CTGTGCTCGGCTGCTCGCGTCTCGCGGTGCCTCCCTTCGCCAGTGAGTGCTCGAGCTGTGTGTTTTTTGCTGCTCGTCGTCCGTGGTTGTTCTTCCCTGCACTGCAGCGCCCGTAGTTGTCTCAGCTCGATAATGCCTCTCAGTCTCACTCGAGTCTCGTCTCAGTCACACTGCCACCGTCTTGTCATTCGTCAGTCTCGTCGCCGTTGTCTCAACGTCTCGCGGCCTTCCCTGGTATCCTCATCGCCGGCGGCAGAAGCAACTAGTGGGGTTGTCGCTTTCTTCGTTGCCTTCCGTGGGGTCGTCGTCGCTCGTTGTTTTCTGGTTTTGGATCCTCGCCCTCTCTGAGTCGCCGTGGACCGTTGAGTTGGAAATAGCATTTGGTAAAGATAGGGCTCA…
>Peanut_newGene_3459	Peanut_newGene_3459.5
AACTTTCCCAGGCTCCCTGTGTTGCTGTTCGAAGACCCATATGTTATGAGTTAACCAGATCTGCCAAATCAAGAATTGCGTTTGTAAAGGGAGAATTGAACCAGATGCCACTAATTTCTGGGCATAGAATGACCGCGTAGACAGGAGTCTCCAGCACCGCCATACATCGTGGGCAGAGATAACTGACTTGAGGTTCAAAATATTTCTCCACAATTCTGCCACTCCATACCTTGGATGTAGGTTTTTCTGATGAAGATGAAAGAAATGGCTATTTCTGGGGGAAAGACACTTTGGAGCAACTGCTGAGTCCACTCCCCTGTTTCTGTTATTAATTGACACACCCAGTTAGTGTTTCATCCCTACACTCATTAGTTGCTATTCTTAATGGTGGTTGTTCCC…
>Peanut_newGene_3464	Peanut_newGene_3464.1
AATTGGCAATTTCAAAACATGGAATTTTCTCTTCCAGGGATCCTAATGTTGCAGCCATGGAACTTGAAATGCTTGAAGACATGAGAAGAATCCAAAAGGAGCAGTGAAAGATCTACAAAGAATCCAAAACACATGAAAAGTTCATGGAATCACATGTTGTGACAAATAGTTTCTTCACCCAAGTTCCTGGCCAGATTGCAAAAGAGAGAGGTCCATCTCCTGATAGCAGGAATCCAAAAAATTCAGAGGAAAAGCCACCTGATCAACTCATGGAGGATGTGGTGGTACACTCATCAAGTGATGGGCACGGGGGCGTCTGCCTAGGTTCAATAATGGAAACCCATATTAGTGGGCAACGAGGTGAAGCAGTTTGAAAAAAAATGGGTTTCGATGGTCATT…
>Peanut_newGene_3465	Peanut_newGene_3465.1
CGTTCGATTGACTCCGAGATTGATTATTCAAGTTTCACAAGTTTCCATCACGGTGACCACCGTATGGGAAATAAATTTCCGATTCATTCGGGGGGTTTTGTATATGGAAACTTCTGAAACTCGAGTAATCAATTTAGGAAGCATTCGAACGAATCACGTTGGATTTAAATTTAGATTCTCCTTTGTACTTAAATGCCACGAGATACGGTTGCTTTAGTTTTAACAACTCCACAACTCCTTTCCGACGTTGATTCAAACGAGCACTATTATTTTATTTCTTGATCCATTTTACTTCTATTTCATCCCCGGTTGGTAGGTGTAATGATGTTGTCAACCATAGGCATTTCGAAATGTTATCTTTATAAAACACAGGCTACTTCGTCATAACTGCAACACTTG…
>Peanut_newGene_3466	Peanut_newGene_3466.2
TGACGACATTCTTATCTATTCTAAGACTGAGGATGAGCATGCTGAACACTTGCGAACAGTGCTACAAATTCTGAAGGATAGGAAGTTGTATGCCAAGCTATCCAAGTGTGAGTTCTGGAAGTCTGAGGTGAAATTTCTTGGTCATGTGGTAAGTAAACAAGGAATAGCAGTGGATCCCACTAAGGTTGAGGCGGTGATGAATTGGGAGCGGCCAACTTCAGTGACGGAAATCAGGAGTTTCTTAGGCTTGGCGGGTTATTATCGAAGGTTCATTAAAGGGTTTTCACAGCTCGCTTTACCCTTAACGAAGCTGACCAGGAAGGATGTTCCTTTTGTATGGACTCCCGAGTGTGAGGAGAATTTCCTTGCCTTAAAGCAGATATTGACTACCGCCCCTGT…
>Peanut_newGene_3469	Peanut_newGene_3469.7
GCCCTACCTCTCCTAGCCTTTCAGCCGTCGTCACAACGTTGTCTGTCGCAATTATCGCTGTGCTTTTCATTCGCATCTCTCGCAATCGTCGCAGCACCTTCCATTCGTAGCTCTCGTAGTCATCACAACACCTCTTGTTCGCAACGCCTTCCATCCAGCCGACCAGCCATCCAGCCCCACCGTTGTTGTCCGCGGAGTGTCCTATATTTGACGGGAACCTTTCTTAGCACTTAGATAGATGGTAGTGAAGAGCAGATGAACTAGACCAAATAGCTCGATGAAAAGGATAAAGCCAAAACTCTTGCTCTTATCCATAAGTGGCCGTAATCTTGTGACTCTCTAGTTCCCCCGCCCAATGGTGATGGTGTCCCTGCAGCTACATCTTTACGCCCATTCCAT…
>Peanut_newGene_3471	Peanut_newGene_3471.1
TGGTGGTGCATTGCTTCTCGGCTCCCAGTGACGACGTCTCTCTCGATGACGACAACCGCAAACAGCGACGGAGCTTCTCTGACCCTCAAGGCCTGAACGACGACGGCGACAACGACTGCTTCTGCCGCTGGTCTTCTTCTCTTCTCTAGCCCCTGCTCAAGTTCAGTTCAGAATACGAACAATGGGAGCAGGAGATCATTGTGAAATAATGGTTGAAGATTTTTACATGCTAAAAGATCCGGTTATCATCCGGTTTTTATCCGGTTTTTACCAGACCCGAAAGTGTGTAGGTTTTATCGGGTCTAGGGCTGAGTTAGGGTCTATAAACTAAGTCCGGTGTATATTTCGGGTCTGGGTTAGGGCAAACACGGTGTAACCCGGCCCATGTACACCCTTAAC…
>Peanut_newGene_3472	Peanut_newGene_3472.1
TCACATCATAATATTGTATTAGCATCAATCAACAATTTATATGAATATAATCAATATTACTTCAAATACAATTTAACTAAATAGAAGGAACACAGCAATAAATTGATGGAAAAAAATTACCTCTCAACTGTAAAAATAGAAGTAATGTAAAAGGCGAGTACCACGGCAAAACACACTGCAGATAGAGGCGAGGCGATGGGGTCGGAGACAAGCAGAAGCTGGATCGACGAGTTAGTGTGCTGCACTTTGGAGGGAATGGGAAGCTTTAAAATGAGATCAAAACATGAGAAATTTCGGTGTGGATGACACCGTTCATGTGCACAAAGATACAACAAATTTTGTAGAAGAAATTTGTTAGATATATTCGAGTTTCTTATGCATCCTATATCAATGTTTGAT…
>Peanut_newGene_3473	Peanut_newGene_3473.1
TATTCAATTTCTCGATTTCATCCAAATTCTTGCGATTCTCGTCGTTTTATTCTCATTCCACCGAAGTCTTGTGAATTCGTTTCATCCACCAGGTTCAACTTCACTGCTACGTTATACCTGCCACGCGGCGGCACGAGGCGGCGGGGGAGGCAGACGCGACTGCGTTCAGGTAGAGGTGCACGTGGCGGTAGAGGTCGTTGAGGTCGACGCCTCAGTAGCCGTTGAACTCAAGTATCTCAACGTATGCGTAAGGAGATAGCAGATCTTGCGCTTATTCGTATAGAGAGTGAAGCAGAGAGAGAATCTGAGATGGAAGCACATTCTGCAGAACGGTGAGTAACCCTAACAGTGTTTGCTGGTTTGAGATTTGTTGTTCTTGAGGAATGGTGGAGTGGAAAA…
>Peanut_newGene_3474	Peanut_newGene_3474.1
CAAAGTGTGGCTTTTAGCCTCTGCGTCGCCAGTGTCAGCACAGTCCCGTCGTCACCGCCGTCATAACCACCGCAAGGATAACGTACAAGGAACCTAGTTGAGAGAGTCTTCGTTGTTGCTGTCGCTGTCGTGTTCATCAAACTTCGTTGTTGTCATCACAGTTTGCATAACCTAGAAATGGAGCGGTCGAAAATTATTAAGCGATGTGTGTCTTTTTATGAAGAGATGAGATCTAACCATGAAGACTTGATGTTGTTCTTTATGCTTACGCTATTTGTTTACTTTAGGGATAGAACTAGTGGCCAATTATCGTTAGGTGGAAGAATGAATAGTAGAGTTAGACGTGAGGCTTTAGAGCGTATCATTGGTGAGGGTGATAGGAATTGTATCTGGGAGTTG…
>Peanut_newGene_3478	Peanut_newGene_3478.1
ACAAACCCCATAATTCTGCCATGGTTATTGTGCATCTTCCTAAAATATAGGCTGAAACCTGCAATAAACCGTCCTCTACAATCTCGGATTAGTCCGCCGCTAGCTCTGTTGCTCTCAGGTTGGAACACAGACCCATCGACATTCAACTTTATCCAATCCTCTTCCAGGGGTTCCCAAACAACATCTTCTCTGGCGAGTCTCAATTTCTTGCTACTCTGTTCCGTGATATTCAGAACAGAATTATAGTTTTCTGCCAATGTCTGAATCAAGTGTTGCAATCGGTTGCTCTGGGGGGAAGTGTGATTGAAAATTATCTCATTCCTGTACCTCCATGCTGTGTTGCAGGTTATGATGAAAGTAATGGTCCATGGTGTACCATTTTGAAGTACAGTGGTTTTC…
>Peanut_newGene_3487	Peanut_newGene_3487.1
ATTCACCGTAAAGCCCCTATTCCCTGACTCTCTCCACTCCCCATTCTCCACACTCTCTTCCCACCATTCACAAAGTCGCCGTCCTCTCAGCCCCTGGAATCGCGGATAGCACCTTCGCGGCGGCCCTTCCTCGTCGCGGTTCCATCTTCTCGGCGCGGTCCTCCCTCAGTCCCTCCCTTCCTCGGCGCGGCTCTTTTTCTCCCTCCGTTCGTCGTCCTCAATGCACTGCAGCCGCCGTCTCCTCTACGCCGTGTCTCTCTAGCCTCCTCGCACCAGGAGCCTTTGTCTTCCTCCACGCACTGGAGCCACCGTCTCCTCCACGCACAAGCAGGCGCCGTCGTCGTCCATGACATTGCCTCCAATTTGTTGCTCACTGTGTCCTGCTCAGTGCTCAGCTTC…
>Peanut_newGene_3503	Peanut_newGene_3503.1
GATGAGATCAGTGTTACAGAGAGTAACTGGAGAAAGATGAAGGCTACGGAGGAATTGAAAGCGCAAGCGGAGGAAAACGACGTCGCCGTTCTGAGTGACGAAGATGAATATCACTCTCAGGACGAAGTAGATGATGGAGACGACGACGAAGATGATGAAGACTACGAAGAAGATGATGACGTCGACGATGATGACGAGGTGGAGGAGGAGGAGGAGGATGATGAAGATGCTCCTGACGGCGGTGATGACGACGAAGAGGACGATGACGAAGGAGGAGGTGGTGACATTCAGCGCGGCGGTGATCCTGACGACGACGACGATGATGAAGACAACGACGACGACGATGAGGAGGAGGAGGAGGAGGAGGAGGAACAACAACAACGGAAAGAGGTAATTCAC…
>Peanut_newGene_3504	Peanut_newGene_3504.1
GATTGATATATATTATTACTTAGTAGCAAAAAGCTCTCGCTACGTTCCTTCACTCTCTTCATCTATCTCAAAGCTATTCATGAAACCAAAAGAAGCCTTCACTAAAGATGATGATGATGGCTATAAAACTAAGAACTGAATTTGGACCACAATGTTCCCCTGCAGAAGCAGAAGCTTCATACTAAGCAGCATGGTGCTATCTTACCTGAGCTTTTTAATTTACATTATAATAATTTCTAAATAATTATAATAATCCCCACCCTAGCTACAAATGTTGTTGTTCATTTTTATTTTCTTGACCTTGTAAGACCTTTTTCTTGACCTTGTAAGACCTAAAACCCTGTGTGTTCTCCTTCTTTTTGCTTCCATGGAAGACACTATGCCAAAACTTATTGAAAT…
>Peanut_newGene_3510	Peanut_newGene_3510.3
GGAAAGAAAGCTGGGTGTTCTTTTTATATCTTAAAGATATAATGTTGGATATTCTGTTTGATAATGAGGATCCTGGATTCTGGTCTTGTTCTGGATATCTAGCTTTGGGAAGGAAAGCGATAGTGAGATAGAAGGCCTTTATGATGCTGAGGATGAACATGAAAATGATTTAGAAGCGCCAGTAGAACCTGAAACTGTTGTTAAGAAGCCTCGTGAACCTTCGTTGTTTACCAAGGAAACTGAAGAGCAACTTTCAAAGAAGGAATTGAAGAAAAAAGAGCTTGAAGCTGCTTTAGCAGAGCTAGGATTGCAAAAAGAACCCAGAAGCCAGGCTGACTCCCATGGTAATATGATGTTTTTGATCTTGTGAAAGAAAAAAAGAAAAAAGATATTATAATT…
>Peanut_newGene_3514	Peanut_newGene_3514.1
ACAAAAACAAGAACATTACAACACACATCAAAATTCTCAACTACATCAATATCCAAATACCCTAAACCTAACTCTCTGTTTGTTGGGGGTTGGAAATTTTGTAGCAGGTGAAAATGGCGAGCTCAGTGGAGAAGGAGGGTGCAGGGGAAGAAGCTGTGTCCGTCGAACTTCCAGCTCCGCCTGGTTGGAAGAAGAAGTACTTACCAAAAAAGGCTGGAACACCAAAGAAAAATGAGATTGTGTTCACTGCTCCAACTGGAGAGGAGATCAATAACAGGAGGCAGCTGGAGCA
>Peanut_newGene_3528	Peanut_newGene_3528.1
ATTTTTTTGAATCCCACAATCAACACAACACAATTTAACATCTTCTTCTTCTTCTTCTTATCTTCTTCTTCTTCTTCTTCTTTTTATGATGTCTAAATCAAATAGTGTAAGAAAACATGTTCTTGAGAAGAGCAAGAGTGTGAAAGAAACACGTTATAATAATAATCATAATAATAATAATAGTAGTAAAAATAATAATAATCATAAAGCATTATTATTGAGCCAAAGTTTCTTCCCAAAATTCTTAAAGAAAGTTTACCCAATTGGTCTTCAAAAAAGCAATTCATCTTTGTCTTTGTCTTCAATATCATTGTCTTTGTCTCAAAACTCAAATGATTCATTATTGTCTCAAGCTGATGATTCAGTCACTAATACTACTCCACTTGATGAGAAGATTTC…
>Peanut_newGene_3530	Peanut_newGene_3530.1
AAAGAAATAAAGTCCAAAGTTTGGTTTGAATCAAAGGGAATTGAATTGAATTAGCAAATTAGCAACAATGGCAAAGAGTTCAATGAAGCTAGCTTTTTGGATCCTCTTGTTAGTTTGCATATCTGTGGAAGTAGCAAGAATTGAAGCAAGGGGACCCTTTGAATGTCCAAGGATGATACATTGTGACAGTGTGTGTCAAGGATTTCCCAGTTGCTGCATAAATGGAAAATGCATTTGTCAGAAATGCCCTTCTCAGAAAACTGAAGATGATTATCAACCTCTACAGGACACTACTAAACCCAATTCTCAGTTAAATTAGGCCTTGTTTTTGTTCTTGTTCTCTTAAATGATGATCATCTACTAGCTGGTTAACAGCATTAGTATTGTATGCTCTTTGAT…
>Peanut_newGene_3532	Peanut_newGene_3532.1
TTAATCATCAATACTCAGGAAGATTCAAACTTTTGAAGAGAAGAAAAAAAAGTTATATTTGAAATTTCAATTCCCAGTAAATTATTGTTCAAACTTCAAAGATACTGTAGATTGTAGAGCTTGCATATTGCACAAGGTAGCGTTTTAATTCTAGTGAAAGATAGATGGAGATGTCGCAAATTCTTTAAATTGCTACGGTCGAATCATCTTCTAACTAATTGTTTTAAACTACTGAAAGGTGCAGAGACACTTGCTTACAGCACTTGCAGCTACCTTACCATTTTTAAGCTTCTTGTGAAAACTAAATCACAAAAACACACACTATAACTTGTGATTTATTCTCACAAAGACATTATTTCTTGAATAGCTTGACTCTGGCTCAGAATGAAAATGTGGTGT…
>Peanut_newGene_3537	Peanut_newGene_3537.2
CTTCATCTTCTTAGTCTTTGACTCTTGCTTCTTTCACACTCTTAGCAACCAAATATTAATGAATATACAAAAATTAATGAATTAGTGAATTCTTAGAATTTTTTTATATATATGTTCCAATAATTCCTCCATTTAATTCCACATATGCCCCTAATCTGATGCATATAAAATATAAATATCCCCCTCTCCGTGCCTAACTCCACCAAAATACCAAACACATAGCTAATAAGCTTTGCTATCCCAAAGAACATAGGGAAGCTTTGCTATAAAAAAAACACAGCTAAGAAAAGATGGTGTCTGTGAGTGAGATCCAAATAATATTACTGAATACTCCATGTCTTTGCTCTCACATCTCATCAACCTCAACCTCTCCGAATCCGGTACCCAGAAGATCATTGC…
>Peanut_newGene_3539	Peanut_newGene_3539.8
GCTTAACAAAAAGTTTCTTCCAATTTTAACCCTCTTTCACCTTTGAAATTCCCATGCCCTGTTCCGCTTGAACCTTGGTCTTCAACAGCTTCCGCAACCTTCAGAGAACGCTGCCTCATGAGTCACTTCACTGGGTCTTCTTCTTCCATTTCCATCAACTGAGTCGCTCAATCATCTGCTTTCTAGCACTGTCGACGATTCAACTCACCACCTTACCACTGCATCAATTACTTCAGTTTCATTTATTATTAGAAAGAAAAGAATGAATTCTACTAAAGATGAGTGCAAAAAGGTTAGATTAAGAAGAAAATCAATATTACTGCTGAAAAGAGGGCGACAAAAAAAACTGGTGACTCTCAAACTAATGAAAGGAATATGAAAAATTTAGGAAAAAGAAAA…
>Peanut_newGene_3542	Peanut_newGene_3542.1
TGCCAGCGTTCAGAGTTCGTGTTCCGCATTCAGGTAGGCATATTTAAGTTACAACCTCGATCTAAAAGAAGGGTAGAGTTCGATGAATGAGGATCCAACCTCATGTTATCTGCTCTAAGCTTCTCATTTTCTGCTCTAAGCTGTGAGTTCTCACTTCTTTTAGTTTGAGACTGCAACAAAATTTAAGTTATTCAAAGACATACACTTTGCTTTTAGTTTGCTTTATCAACACCACGTCCAATTGTATTAAAATTTACCTTCACTTGAGTGCATTTGCCTCTTTGAATATTGAAGACTCTGTATACTAGTATTACAGTTTGCTGATTTGCAAATTGCAAAGAATACCTTATCCTTATTTGTATTTTACTTTGTAGAGTAAGTACTATGTAGGGTCTGAAA…
>Peanut_newGene_3543	Peanut_newGene_3543.1
GGGAAGAATCCCTAGAAGACAGCTATAAAGAAGGGCAGTCCGGCCTGAAATTCGATAGCAAAAATTTTAGTTAATGCCTGAGAAAATCTGACCAAAAAAAAAAAATGCCTGAGAAAAAAATTGTCTATTCCTTGTAGCCTTCATAATACTCTTCGACTTCATCTGAGTATCCTTACAGTTATGTAGAGTAACTCGAATTTGAAAAGCTGATTCTACAGCTGAACTTATCCAGTATCGACAAAGGGAACATTTCATAGAGGATCAAAGTAAAGACAAAGAGAACTTCTGTAGTCAAGGACTTGCTTTCGCTGCATGCAAGGATGTATAATCATTGAACTAATGATAAAATCTACCATGGCGCAAGTGTATGGTATAGCCTTGAAGGATACAGCTCATATG…
>Peanut_newGene_3544	Peanut_newGene_3544.1
AATCCACTTGCCAATGTAGTTCCTTAAGAGACCGCCACATTCCGCCATCCTAGTTGCGCCATTTCTTGATCCATTGGTGTTCAATTTCAACCATTCCGGTGGGGTCCAATGTGTGCCTCTTCTCTTCTTCTAGCGTTGAAAGCTCCATAATTTCCAGCAAGTGATGATAAAAATATCTTGTCAATTTCTGTCCTGATTAATCCCAAACTAATGGGTCAGATTGTCTTTTACCCATTATTTAAAGTTGGTACCGATTTGAGGTGCGTTGGGCCACAGCAAGTTTGTCCAAATTGAAGAGACTTTTGGGTAATTTCTTAAGGCATTAATGATATCCTCAGCATGTTGCTCGCAAAGTTGGCAAGTATTTTCACTGCCAAGAGTTCGAGCTTTCTTTCATGG…
>Peanut_newGene_3547	Peanut_newGene_3547.1
CTCAAATTGAGATGGCATTGGGAAAGGTTTACCGAAGCTTGCTCGGCATATTGAGATGGTTTGAGATGTGATGGGATGGCAGTGGATGGAGTAGGTGAGAATAGAGAAACGATGATGATGGTGGTGAAAAAAGAGAGAGGTATTTTTGTCATTTAAAAAACTAATCTATCAAAAAAGAAAATTTTAAAATCACGGTTAAATTTTAAGAGCGATTTTGTATGAAAAAAGTTGGGGACAAAAAAAATTTTCAGTCTAAATTATAGGAACTAAAATCGTACTTAACCCTTAAAAAAAAGAAAAGAAGTCATTCTTATTCCGAAGTAATTTATGTTATAAGGTTCAATATTTGGCTTCTATCTAATGAGTAAAAAATAAAAAAAGTAGAAGTAATACATAGGG…
>Peanut_newGene_3548	Peanut_newGene_3548.4
GTTTTCGAGTGCGCAGCTAGACAATTTTAATTTGGGAGGTTTTTATCAAACCCCAACCCGTTCTCTCCCTCCCTAATTGAAACATGGTGAATAACTTCTAAGGGTTCTCTGCCTTTCCCCTGCATTCAAAATCACACCTTTCTCATCTTATCGAGTTTTGGCGTTGCTCAATCTCCTTGCTTCGCCATGTATGTGTATCCTCTCTCACTACCAGTTTAGTCCACCTCTACCTGCGAATCCTGCGAACAAATCTCAATTCAATCCACCACCCACGCACTGCCCTTCGATCGTTCTGGTTGCGACCTAAGTTTCTGAGATCGAGAGAGAAAGCGCGTCTTCCTTCAACACATCTCCTCCGCCAACAACGTCGTTGCTCTCTCCGTTAGCAAACTATCAATT…
>Peanut_newGene_3550	Peanut_newGene_3550.1
CAAAAAAGGGTTCAATTTGCGTGTTCGACAGAGTTATAGAAGCAATAGCAGCCATGGATGTCAGAATGTAACCAAATTTCAACGTTTGAAGAAGAGGAGAGCTCTGTCCACAGGCGCCGCAGCAACTATGCAAATTTCAACGTCTGGCATCCAGAGGAGGGGGAAAAGCACAGGCCTTTCTTTTTCTTTCTTCTTTCTATTTATTTTTTTGTTTATTTTTTATTTTAACTTTCAAGAGTTTAGAATTTTTTGTGTTTAGATAACTTTTATCTTTAAAAATATTAATTTTAGTTCATGTCTTGAACTCTTGATTCATTTTTTGAATTTGAAAATAGAAAATGGATATTGTCACTTCCAAATGACTGATATCAC
>Peanut_newGene_3551	Peanut_newGene_3551.4
GCGAAACCTAGTGGCGGCTAAACAGCGGCCGTGGCCACAAACGCTGCTAATTGAATAGATCCCCGCAGAGGTCAGCTGCGGTCTAGAGAGAAGCCGCAAAACGACCCTGGGTAGCGGCCATGCACTCAGAACCGCTGCCAATTTTGGGCTCTATATAACTTCAATCCTCTTTATTTTACCCATCCTCTTGGCACGAAGACAAACACGATCAGAGGCGCGAAGAGCACTCAACCTTTCCGCGAGAACACCCAGAAATCCCGCTAGTTGATTTTGGTAGCGCGCCAAACACGAGCGGGAGCAGAGCCGCGCAATATCAGCACAAGAACCCACCCAGAAACCCCTTGCCAAATCCCTGACCTCTGCTCCACCCGCCGCTTCTGTCTTGGCTGTCGAATCGCG…
>Peanut_newGene_3552	Peanut_newGene_3552.1
GGTTGATTTGCGTTTTTTAACTACTAGTAGTTTAGTGCTAATGTCCTTTACAGACTTGATACGGTCTACTTTTTCTTCAACTCAACTAATTGTCTGCCAAGACTTGGTTTTAACTGTAGATGACTATAGACTAGAGAGGTGTTGAGTATTCTGTTGAATAAGCATCTGTAAGATTAACTCATTGAAATGTAGGTCAATTATCAATAAAAGCCCAGGAAACCTAGAAATGAAGTGGTAACATCCAAACGAGAAGCCTAACAAATTCTTATTTGAACAAATGTGTTGAGAAAGGAAACTGGTCATTCAAACTCTGGGTTGCTGTGGGGGATCAACAATCAAGCCTTCAGTATTGCTCCTTTTTATTACAAAGAGAAGTGGAACATTTACTATGAACTTTTT…
>Peanut_newGene_3553	Peanut_newGene_3553.1
GTTTGTGATTTATTTTCTGTATTAGGGGTTTTCTCAGCATCAGCTAACCCCGCGATCCCATAGTTAGGTATTCAATAGGAAAGGGAGCTCTTCATCCTTCTTCTCATCATCTCCACAGCGAATTAGATCAAAGGGTTTTGTTTCCACAACGAAGATGGGAGCGTGAGTGGGAGAGAATGTTGAGGGCTCTGTAAGCAACATAAATAAACCCAGGCACATAAAAAATGATCATGCAATGTTAGGAGGGGAGTTTGTTTTGCAAAGAGGACAGCTGGTGTGCAATCCGCTTTCTAAAAGCCTAAGGAGAAGTGTTAGAGAGAGAATTACTACTAGGAGGTTGGAGGGCTATGCTCGATAGTAATTAGTGATGCTAGAATCGATTAAGGAGGAGCACATAGC…
>Peanut_newGene_3558	Peanut_newGene_3558.4
ATCGCTATTCCAGTTCTGCACTTTTATGGTTTTTATTTTGGGACTCTGCACTTCTGCGGTTCTGCCATTGTTGCCTTCTCCACAGTTAGCATCTTCAACTCTGGTTTGTGCATCTGCTGGCCTGCTGCTTCTCAAAGACTCAAAGTTAATAAATCTAGTGAAGTATCTCAAGTTCTCAACTCTCAAATTTAAAGACTCTGAGGTTTGAAATGGCTTCAAATGCAAAAAATGGTGGAAATAATACTGGGGCTGAAACTGTTGGTGGTGGTGCATCCGAGAAGGTCGCTAAAAATACTCCAGGAAATAGGAGTGACAAAGCTTGGAAGCATGGGATTTCTATTGATGGAGATGCCAAGAAAATAAAATGTAAGTATTGTGATAAGGTTGTGACAGGATGAG…
>Peanut_newGene_3559	Peanut_newGene_3559.1
TAGGGATCTAATTGAAAATCTTGCAAAACTATAGGGATCAACAGAGTAATTAAACTACTTTTAAATAACTACAACTTATATACGAATTTTAACTTTGAAGATAGTTATGTCAATAGTACAACTGCGAAATTGTTGGACAGAGCTTCTTGAGAAATTTTATTGGGATTGCACTTGCAGTGGCAAATCATGAGAAATTATGAACCAGAATTGCTTATTAATAGAGCTTTACAGTAATATGGAATGAAGGCAAGGGAGAAAGAAGTGAGGACTTCAAAATGAAGTACAAATATTCTCATATTGCCTCTATAGTACAGAAGGATGGCAGCCGAGGCCTGGGTCAGATGGCAACTTTATTTGCCTCCTATAGAGCTGCACCGGGTTCAAATCCTCATGGAGGAA…
>Peanut_newGene_3588	Peanut_newGene_3588.1
ACCCAACCACCCCCTCCCAAGCCCTCGTCTCTCTGTCTCTGCTCTCTCAAGCTTGGCGTTGGCAGCGGGTAGTCTCTCACCTTCACCTCGTCACTCTCTCGAGCTCGGCGTCGGCATCCCCTCACCCTCACCTCGTCGTCAGTTCGTCACTCTCAGTTTCTGGGTCTCTCACCTCATCGCTGTCTCGGTCTCTCACCATGAGTCCGTGATCCTGCGTTCGCTTCGTCGAAACCAGTGAAGCAACACCTGCTCCCTCGGGTGGTGGTGGTGGCGTCTTCTCTACCATGCAAGCTCCAGTTTTCAACCCTGTTCTTTCTCTAGGTCAATGTTCATTTCGGTGAATCTGGTTTTCCAACTAGCCATTATACCTGAGATTGCGAGAAGTCCTTCTTCTTCTTT…
>Peanut_newGene_3593	Peanut_newGene_3593.1
GGAAGATAAGATGTAAGAAAAAAAAGATATCACTATCTCGCATGCTTACATATTTAGTTTCTATTTTTATTTCCTGATTTCATTTTTAGTATTCTCTGTTAGGATTTTGCGAAATCAGAAAATATGATTTTATTGTTTTCAACTTTTTTCTTCTCAAAATGTTGAAAACATAAACCAAACAGTAACGTTCTTTCTGCTTTTACCGGAATCCTCTTGATTATTCAAGGTCTTCCATGTATTGTGATAGGATTGTAAGCCATATTTGTGATAAAGTTGAATGGAGCATACAAGAACACACATTTGTCAAGGAATTCAAGATGAGTGGTTTGCCTTCACTTAGTGAGAAATTGGAGAAATTCCTAACTCTATTGGTAACTCTTTCCTCTCAGAATATCTCAG…
>Peanut_newGene_3594	Peanut_newGene_3594.1
AGTGGCGCTCACACATGCATGGAGAAGAGAATCGCGAAAGGAGGGACGGTGACCTCGCCCCGCCGCCCAGCTCACCATTGTGCTGCTGCCGATCTATCTTGGAGCCGCCGTCGAGCCGTCCCGCTGCCGCTGCCAGCGCTGCGATGAGAGAGAGACCGGGCAGAGAGGGAGAGAGCTCGTGAGGGAGCTACTGAGGACGCCAGCCAAGGGCTAGGGGAAGGAAGACGCCGCCACCGTTTGAGCCCATCTCCGTCCATAGAGTCGCGAGGAGCGCCGCCGTTGTTATCGCGGTATGCGGCTTCACGAAGAAAGAGAGACTAACCGAAGTCTGGGGTAGGAGCGAGGCCCTGTTCTGCGCCGCCCATGCCTTCACGACGTCGAACCACCACCGCCACTGCT…
>Peanut_newGene_3599	Peanut_newGene_3599.1
AAGGAAGAAAGGGAAAATGAAAAACACAGAAGCAAAGAGAGATTCGAGAGTGAGAGCTGGCGACTGAAGGAAGAGGAGAGGCGAGGGGCTGTCCCGCGCCGGTGTCGCGCCTCACCGTTCGTGAAGCCACACGTCTTCATCTCGCCGACAGGATGAGTGCCGTTGTCGCCGCCACAATCGCGAACAAGAGGAGGAGACTGAGAAGGAGATGCATGCAAGGGAGTTCAGCTGAGGAGAGAGGAGATGCCGTGTACGTTCTGCTCCATCGTCGTCTTCGCGGAGAACCATCATCGCCACCGCTGCCGTTGATAGAACCATTGTCGTCGGAGAAGCCACTGCTGGGAGAATCCCTAGCCATCACCGTCGCTATTGAACCGGGGAGAAAGAGAATGAGTGACA…
>Peanut_newGene_3601	Peanut_newGene_3601.3
AAATAATCTTATAAGAGTAGATGCTTTCTTTGAATTTTGATCTGAGCTATCATTTCCTGTGTATAATATTGCCTGAAAATTATTCCCAACTATTAATAATGTTAGTGTCTTGCTTCACGATGCAAAACTAGAAAGAACAAGTTGCTAACATAGACCTTAATCACGCTAACACGATGATCTTCACGGTTAACAAATGGATGCAGTTTCTCAGTGGAATAGAGAATTAGGGGAATAACAAAGTACTTCCAAGTCTGCAATGATAAAAAGCTAAAAGAGATCGAGAATTTCACACTGATCAAATAAGGAATTAGCAGCCCTATGGTAAGTGCCTTCCCTTCTATGCATTGAGGCTCTTTATGATTTCTAAAGCATCTTGGTACCTACTTCCTCTGGCTTGGG…
>Peanut_newGene_3603	Peanut_newGene_3603.1
AAAGTTTCTTCCAAATTTAACCATCTTTCACCTTTGAAATTCCCATGCCCTGTTCCGCTTGAACCTTGGTTTCCGCTTGAACCTTGGTCTCCAACAGCTTCCGCAACCTTCAGAGAACGCTGCCTTACAGTCACTTCACTGGATCTTCTTCTTCCATTTCCATCAACTGAGTCGCTCAATCATCTGCTCCCTAGCACTGTCGACGATTCAACTCACCACCTTACCACTGCATCAATTACTTCAGTTTCATTTATTATTAGAAAGAAAAGAATGAATTCTACTAAAGATGAGTGCAAAAAGGCTAGATTAAGAAGAAAATCAATATTACTGCTGAAAAGAGGGCGACAAAAAAAAACTGGTGACTCTCAAACTAATGAAAGGAATATGAAAAATTTAGGA…
>Peanut_newGene_3613	Peanut_newGene_3613.5
ATTTCACTGTCACCGAAACAGAGTAAGTGAGGGCGAGAACCTGATTCAGAGGGAAGAGAGATCTCATCACCGAAACCCTAAGTTCACTGTCACCGTCATCATCGCCGCGCCGCCTTAGGTCATCTCCACCCTCCAAATCGGCGCCTCCGCCTCCCCTGACATCTTCCTCCACCTCCTCCCCTCCCGCTTTCCAATCTCTGCAACCTCCATATCCACGAGTGCCTCTCTATTCTCCTTCCCCTCTCTCTTCCCGTTCCTGCTGGAAGCCGCTCTCTCAAGGTGCATTGTGTTGCCGACAACACCTCCTTCGCCATTTGAGGAACTTAGGGTTACTACTTTCAGTTGAATCGAAGAAAATGACGAAGAGTGAGCGAAAGAAACGAAACAACAAGAGTAAAG…
>Peanut_newGene_3627	Peanut_newGene_3627.2
CTGGTCTGTAGCAGGGGCATTCTACCATATTGGCAGGGTCAATAGCTTGGTTCTCCTTTCTGAAGGACGATGGTGGTGGTAAAACTCTTTAACGAATTTATGAATGATTAGAGGCCCTAGATGCAACAACTGCAGAAAAGCATGCTGCTGAAATTTTACATGGTCTCGGTTTCAACAAGGAGATGCAAGCAAAGAAGACACGTGATTTTTCTGGTGGCTGGAGAATGAGAATTGCACTAGCTCGAGCTCTATTTATGAACCCAACCATTCTTCTACTTGATGAACTAACCAATCACCTTGATTGACTTGAGGCACATTTTCTGCAAGATGTCTGTGAGGTTTGCCTAGAGAAATTGCCAAACTATGAAGAGAAGATCAAAAGCTTCTTTGAAGAGCATC…
>Peanut_newGene_3629	Peanut_newGene_3629.1
AAGAATTTCAAATATCTGCTTTATAATGGAGTTTTAGATAAGTATTTTCCTCATGTCTGAGTTTGTTTTAATATGTTTGGTATTGTTTCTTATTCTCAGCCAAGTACAATAAAAGACCAAGATTATTTTCTTCATATTGAATAAAAATAATATCATTAGAAAGAAGAGTTGAAAACTGGGTTTATACTTTATACCTTTTGGAAGTGATGTAAAGGAAGTTCACCCAGACCAGAGTAGCTTTCTGAAAGAACTAGTTTCCCTAATTCCAAGTATCACTTGTGATATTACATCATTATTAGCAGCATTTGTCTTAATTTTAGAAAAAGTTTGATTTTGGATTTCTTCTTATGCAAAGAAAAATATATAGTACTTTAAAGTAATATTTATCACCCTCTAAAG…
>Peanut_newGene_3633	Peanut_newGene_3633.3
TGAGTGAGCACGTGGGTTAACGAAACCCCAATCCTTACTCTCAGCTTCCTTTCCCCCTTTCTCTTCTCCCTTCCCTCTCCTCACGGCAGCCCTTCTCTTCTCCATCACAGCCCCGCCATCATCGTCAGACCACCGCTGCCGCCCTCCTTCCGCCGGAAGCCACCATCTTCCTCTTCCCTTTCTTCTTCTCCCTTCTCAGAATCGCCACTAATAGCCCCTGCTTCACCCTGAACCATCCCTTCACCCACAACTGCCGGCGAGCTCTTCCCCCTGTCCGAACCCTAGCTCCGCCAACCATCACCGTCAGCCTCGAACCAGAACCCACCGCGCCGTCGACGAGCCACCGCGACCCTCTTCCCTCTTCTCCCCTTCGCGTGCTCTCTGTCCTCCTCAGCCACA…
>Peanut_newGene_3658	Peanut_newGene_3658.1
TCTCAATCTTAATCGCGCTCTGAATCCTTTTCTCGGACAAGCTTGTGTTGATTTCGATTGAAATCTCAATCGCGCTCTAGCAATCAGTCGTGGAATCCGCCATCAGTGTTGAGCACGTCGATTTCACAAAGGCATGCCACATCTTGTAATGTGCATCACTATTTAGACAAACAGTGCCGATGGTTTTGATTGTTCAATGTGTTGGAAAAAGATCGGTTCATATTTTTCTTCCAATTTCACTCTGCGGCAGTTTCATGTGCAGCAAAATATGTCATCGTATGATGCTGAAACCACTTATTATGATGAAGGTCCAAGATCTACATACCGAAATCAACTTAAAGAAAATTTGTTGCAGATTCATTGATTGGGAACCTTACAAGATTTCAGCAATTGGTTATA…
>Peanut_newGene_3660	Peanut_newGene_3660.1
AGTCGAAACACCACGTGCGTGACGCTGTTGCTCCTGGCCTGCGCAATGATCTCCGATCTTCTTGCGTTCTCCGATGATCTTCTCCGGTGACATCTCATCCGGCGTCGATCTCCTTCGGCGACATCTTCTACAGCGGCGATCTCCTCTAGTGACGTCTCCTCCAGCTTCCTCTCCTTGTCGACCTCTGTGTCTTCTCCACCAAAATCATCAACACCTTCCTTTCCTTCCTTCTTTCCTTCCTTTCCTTTCCTTTAATTTCCTTTCTCTATGATAAGTCTCTCTTTTAAGGCCATTTGCGAGGATTCATCGCGAGTGGAGAAGTCGATTCCGCCATTTGCGCAGTAAGATCAACAACAATTTGTGTTCCACTGCTCTGCCACCGCTGACGTTCCTCCATTT…
>Peanut_newGene_3661	Peanut_newGene_3661.1
GTTTCCCAAACATTAACCCCAAACCTCCAGAGACTCAAAGTTCAGAGTGAAGCTGCTGCTGCTTCTTCTTCTCCAATGCTTGAGAGTAGAGACCAGAGACGGAGTCACCGTCACGGAGAGAGGCAGAGAGCATATGAGTAGAGCTTCTTCTCCTCCGACGATTGAAAAAACCCGCCGTCCTCCGTCGGAGAGCAGAGCTTCTTCTTTTTCTTCTCCTCCTCCTCCGCCGAGCCTGTCGCCGTGCCATCTGTTCATGGAGTGAAATGCGGTATCTATGGTGCCAATTGCCCTGGGTGGATAATAAGCATGGAGGTTCATTTTCATTTCTTCGCTTTCACATTTTGTTTCATCATCCTCTCAATGAAGATTCACCACA
>Peanut_newGene_3669	Peanut_newGene_3669.2
TTTGCAGATAATTTTGACTATGACATAATCTAATATTTTGATATTCTTGGCTTATTTCCTTGCATATGAAACGTGACTTGGTGCATCTTTGGCTGCCACTACAGTATTTGGGTATGAAAAGCTTCCTCTCAAAATTCTACTCGTTCAACTTATATTAAGCTTTTGCACAGTTATATACTATATACATTGTTTTAAGATATGGTAGTCTTTTTCTGAAACTTATTAATAAATTATTGTCATGGTTATCATCAGGTGAATATGACAAAGAAGAAAAGGCTGCGAGAGCTTATGATTTGGCAGCTTTAAAGTATTGGGGTCCCACTGCTACCGCCAACTTCCCGGTTTCCAATTACCCAAAGGGACTGGAGGAGATGAAACACGTAACAAAGCAAGAATTCA…
>Peanut_newGene_3671	Peanut_newGene_3671.2
GGGAAGAAAGAAGGAAATGGAGAGCAGAGGGAGAGGGTGACGGAACTGAGAAGAAGAGGGAGAAGTGGATCGTCATCGGGGAGGGAGGAGACTGCCGCCGTCGTGAGCCATCACTGCGCGCTGTCGTCGAGTACACGGACCAGAGGGAGACGCGAGCAGTGACTGAGAGGAAGCTCCGTCCTCATCGCCGTTCCATAGTCGCTGTTGAAGCCAACCTCGTTGTCGTCGAATCGTCGCTGCTGTGCCGCCATCAAGTCTGAGTTGAGGAAAGGAGACGTGGAGTCGGTGTCGCCCAGAGAGAAACGCGAATGGCGAGGCGAAGCAGAACGCATGGTGGGAAGGCTTTCCTTGCCACTGCCGCCGCCGGAATCATGAACCAAGGTGGAGGAGAAGGCCGTC…
>Peanut_newGene_3676	Peanut_newGene_3676.1
ATAAGAGGTTCTCAATGACAATTAATAGTTCAACCATAATATTTCTGGTTCATTCTTCTAAATAATGGCCTACGCGGTGTCATTTCCTGGTGTTCATTTTGTTCCATTGGGAAGAATTCTGTGCAGACATGACAGATTCATTTTAGCTGCACATTCAAATAGGAGAAGATCAACAAAGAATGTCCAGCTTCCACGACGTGCCAAGCAACCTCCAGAGTTTGGCGTTAATCTGTTCTTGAAGAAGCCTAGCCCCACCCCTGAAACAAGAGAGGAAAATACTGATTTCCGTGAAGGAGGATCTATTGTTGCCAACGAAGAGGAAGAAGAGGAAAAAGAAAATACTATTGTTCTTTGGGAATCTGATGAGATTGAAGCCATCTCTTCCTTGTTTCAAGGGAG…
>Peanut_newGene_3677	Peanut_newGene_3677.3
CCCCAAAGATTAACTTTCACACACTCTACCTTATAAAGGTCCTAATTCATGATTCTGTGCTGCTCTCTACTTTTTTTTTTGTTCTTTTTTGTATTGTCCTATCATCTGTTCTGATATTTTCTTTTAGTCCCTCCTTATGTAAATATTCAACCACAGCTTCTTCATCTATACATTGTAAACCGAGTTGAGACCCAAGTTTTCAGGTTCTTCTTGCTTCCTTCTCTAAGTAATCTATATCACTTTCATCATTTTGCTCCTGAGTCATCATTTTTCCTCTCTCTCGGATTCTTGCACGGTTTCATTCCTCCTTGTTTGGTGATTTCCCTTGTTTCTTGGTTATATTTTTTCTTCTTATTGAATGTTAGCTCGCTACCCTTTTTTGTGTGACCTCCTATTTTT…
>Peanut_newGene_3678	Peanut_newGene_3678.1
TTTTGTTTATCACGAAGTGTTTATAGGCAAGCGTGGTGGCTGAGAACAGGCGAAATGGTTCTTCGTTTACTCATCGAGGGTCAACCACACACTAAGATTTTTCTGACATGAATAAGATAAAGAAGCTCAATGAAAATGCATGGAATTACCTCAACAAATGGTTTAGGAAGTCTTGGACAAAGTCAACCTTCCGCTATAATGCAAAACTAGACAACATTTGTAACAATGCGTGCCAGGACTTTAATGTACGAATCAAAGAAACATGGGCCAAGTCAATCATCATTCTTCTAAAGAAGTAAGAATGTTTGTTATGAGATCCATAGCAAAAAATAAATTTAAGCATGCCAACCACATAGGGAGACTACCACCTGTAATTCAGAGTAGGTTGGATGAGATTAG…
>Peanut_newGene_3683	Peanut_newGene_3683.1
AAATCGGCATTGTTTTGGGCCAAAAAAAAGGAAGGCAGCAACATAACTTTAATCGGCTAAACCTCTCACTTTGCTCACACTCACTCTCTTCATCTTCGCGTTTCGTCCTCCATCCCTCGCCGTCGTCCATCCTTCACTGCCGTTTGCTGTTCGTCATTCCTGAAACCACCGTTCTCTCACTCTTAGTCTCTCATTCAGCTCGACACTCTCTCACTCTCTCACTCTCTGTTCTGCATCGAAGAATGTGGACTCGTGGAGCCTCTGCCATCCGCCATGCTGCCATCGCTCGTCGTGTCTTCTGCCCCTCATCGCGCTTCCGCCGTTCGTTCTGTCAGGTGTCAGCCCGTCGTGTGTCTGCACAGCACAGCATAGCAACGCGAGTGTTAGCTAAGCCTACTC…
>Peanut_newGene_3688	Peanut_newGene_3688.1
GGTAGTTTCACCCACTGATTTGAAATCATCGAGCCTTGGGCAGCCTCATGCATTTCGGAAGCACCAATATGCAGCGCCCTGAGGAACTCATCATGACTCTTCTTTGCTGATTCTGCCACATCTCTTGGGTTCGAGTCCTTCCCTTCGAAGAGGAGCAAGTTGCGCACTGTCTAGAGCTCAATGAGACAATAATAGAAAAGGCCTTGTGATTCGGGCTCCAGAGCTTTATGCAAACTTTCAATCCATTCGAGGGCCTCCATTCCTTGGTTCTCCGACGATCTAATCGCAAGGGAGCAGTTAAACCAGAAGCTCCGAGCGAATTCGCAGTTCTTGATCAGGTGAGTTTCTGATTCCTCCTTCTTCCAACATCTGGGACAAAGGGCTGTGCAATTGACATAC…
>Peanut_newGene_3689	Peanut_newGene_3689.2
CAATTATTCGTGAATCGTCCTTCATCGCTACCAAGGGAAACCCTAGCCCTTCATCACTGCCGCCGTTCCCAGGTTCAGAGCGCCGCCGCCGTCCCCAGGTCGTCAGCGCCGCTGCTTCTTCCTCTCCCCCGTGTCCCGAACCCAGTAGCGCGGCACGTCGTCTTCATCTTCACATGCTTCTCGGCACGGAATCCAGTTGCTGATTTTGCTGGGTGAAGAATTAGTGTTTTGGAATGTTTCATAATGTGCTAAATGCTTAATGGTGTAGGCAGATTTTAGTGTTTTGTAGTTGCTAGTTTTGCTGGTTTTGGAATGCTGAAGGCTGGTTTTTGCTGAAATGTTTTGGCCATTATAGCTTCTTTGATCAACTTCTGCTGAGAATATGCTATACACAGGTCT…
>Peanut_newGene_3690	Peanut_newGene_3690.3
AAAAAATATTTAAAAAGTTTTATAAATACTTTAGCTTATTTATATGAGATAAAAGAAATGATTTATGGAATATTACAAAATAAAAATAATTATGATACATTAAGAAAAAGGTGTCTCATCGGTATTTGAGAAATAAATTTGTCTATTTTTTAAGGAAGAACAAAGACCAAAAAAACATACTATTGAAAAGTGAAAACTGGGTTATTGGTGCGTTTACAACCGACGGTCCTTTTAAATCTGTCTTTAAACTATTCAAGATATTTATGAAATTTAATAAGTAAATTGATCAATTGTTAGTTTTTATTTTTATTATATTGTTTTTCATAAAATAATTGCATTGAAAATAGATTTTCCAACATTCATATTTTATAGACGATTGCAGAGACAAAATATTTTATT…
>Peanut_newGene_3694	Peanut_newGene_3694.1
ATGGGAAACACACAGAAACTGAATTGGGGGAAGGAAAGAACAATGAACTCCAAAACCTAACCCCTTGTCTTGATTTTAATTCGTCGTAACTTTCAATCCGGAGCTCCGATTGACGAGCCGTCAGCGATCACGCGTTCGTCTCGGAATCCTCTACGAAACCCACCCCATAATTTGGTTCTAATTAGCTTCGTGGACTTGCGGGTCTTATCCCAGTTTTGCATTAGTAAGTTTGGATTGTGAACTTTCAAAACAAATTGGTGGTGTTGGAGACTTGGTATTGGACTCTGGAAAGATAGAGACCCGTTTGGTGAGACTTTGGAAACTTGGGTATCATGGAACGGTAACAAATTGTGACGTTCTGGGTTTTACGAGGAATCGGTCAAGGTATGATTTTGGTTT…
>Peanut_newGene_3697	Peanut_newGene_3697.1
ATGGTTGGTTTTTTCTTATGATCTTCTTCGTCCATAACGATGACGTCATAGAAGTATTGGACAAGTCACAGGCGAGAGAGTTGAAAATCAAGAAGAGGAGAGGAAGATCTAAGAGACGAGGAGGCGGAGGAGGAGAAGCAAGCTTCAGGAGCAGAGGCGAACAGAGCTTTCACGGTGATTTCAGAGGCGGCAGAGTGGGGAAGAAGCAGCACAGCAAGCTGACAACACTGGTGAACAGAACGTGGTAGCAGGTAACTAGGAGCTAAAATCATGTTTAGGAAATTCACTGAATTTTGCTGTTGTCAGTGAATATGGTTGTGAATGAACTAGACAAAACCTTGCACCACCAAAAAAGCAGCCACTTTCTGAAGGAAGAAAAAAATTGTGCCTGGGAGTTTA…
>Peanut_newGene_3698	Peanut_newGene_3698.1
CACAATTATATATTTCAAGTTAATTATATATACTTTGGTTTTTGCATGTGTTTGATGGATAGGGATAGGTAGAATAGAATGAATTTGTTGCTGCTGTGCATGATATACTGAGTTTGATTATGTACTATTATTTTTGCATATGTTTGATGTATAGGGATAGGTAGAATAGAATGAATTTGCCACTACTTCTCTGCATGATATACTAAGTTTGATTGTTTGATTTAGTCAGTTTGATTGTGTTTTCTTGTTTTTATTATAGGTATGATATGCCTTTTGCCTCATTTGTTGGGGTTAACCACCATGGCCAATCATTGCTACTTGGTTGCGCTCTTCTTTCATGCGAAGAAGAGAGTTCCTTTGTTTGGTTATTTGATTGTTGGATACGATGTATGGGTGGCA…
>Peanut_newGene_3699	Peanut_newGene_3699.1
CGGTGCCCTTTGCTTTGCTTTGCGCTATTTTTGGTTCTTGTTATCTTAGGGTTTTGATTATAAATTTTGATTCAATGGAATCCATAAACTCGAATGATGAGGTTGTTCCAAGCATAGGAATGGCATTCTCCTCTGTATGTTCTAGAATTGGTTATCGAAGATAAAAAATTGATCCATTAAAGAAGACAAATCCTTTCGAGAAAAATTATAAAGTTAGGATTATTGTGAAAAGGGATAAGAAGATGGAATATGTGTTAACCTTTGTGAATATCCAGCACAACCATGCTATTAGTCCTAGCATGGCAAAGACCCTAAGAAAGAATAGGGAACTAAGCTTGCATGCCAAACGGATAGCTAAGATCATTGATTAAGCTAGTGTTACAATGAGAAACACATATC…
>Peanut_newGene_3701	Peanut_newGene_3701.2
CTTGCATAAAGGGTTTCATTGCATGCCCTTCAATTCTCTTCTTTTCGATTGCGCCAACCTCACTACTCACTTTCTTCTCTTCTCCACGGTTCTCTTTGTTTTGCTTTGCGCTGTTTTTAGTTCTTGTTATCTTAGGGTTTTGACTATAAGTTTTGATTCAATGGAATCTACAAACTCGAATTGATGAGATTTATGTTTAATTTACTTCATATGTTAATTTTTTATTCTTGATTTGATTTTAATTTTTTGATTATATCTTAGGGTTTTTGATTCTTGTTATCTTAGGCTTATGCTTCTGATATATATGGCTTCATTATGTCATTTAGATCCTTTTACATCATGTACGTTATGTGATTATATCCTGAAAAGTTTATGTTATAAATTTGTGTAATGAAAAAA…
>Peanut_newGene_3705	Peanut_newGene_3705.1
GTTGTCTCCTTAGATTTTTGGAAGAATCCAATGTCGAAAACGCTGAGACGGAAGTTGTGAGTGAGCTGAAGTGGCTACTAGAGCAGAAGCTTGAAGTCGGCCAGGACAAGGAGGCGCTCTCCAATCTCCATTCACACCTTTTGCAAAAAAATTATTTGTAATTTGCTTCGTCGGAATGACGAGGCGAAGGAACAACTTGCCAAGTATCAAGAGTTGTCACCAAAGAAGTTTGAAGTGGAGGTAGAGGACCGCACAAGAACTCGATTCTCTTGAACGCGATGCTTTCCAGAAAATTGCTCAACTTCGCGACTCTTCTACCCCTCCTTCTTCTCAACAATTCAATCTACAACAACACCATTTTCGAAAACCACCGTCTGCCAACCATTCCCAACCCTTCCC…
>Peanut_newGene_3713	Peanut_newGene_3713.3
CGCACACACACGCTTTGGAAAAGAAAGAAAGAAAGGAAAGAAAGAAAGAAAAGAAGAAAGAGAGAGGGAAACGAGGAACCGAGAGGGAGGGGGCGCCGAGGATGAAGGAACGCTAGGAGAGGTGGAGCTCGCCGCCACCATCGCATCAGCGCCTCGCCGCCGTCATACTCGCAGGCATGGAAGAAGCCCTTCACTGCCGCTGCTGCTCGTGAAGCCGACGCCGTCGCGGGTTAGAACTGGGGCGAGAGAGAAGGTCGCGAAGGAGGAGAGAACCGCGCCGTCCAGTCGCCGTCTGTGAAGCCTGGGTCGCCGTCCACGCTCGCCGCCGCCGTTTGTCCTCCCCACTGCCAGACGCCGTCGCCGTTTGTGAAGAAGAGAGGGAGCTCACCTTGCCTTCAG…
>Peanut_newGene_3714	Peanut_newGene_3714.5
TGAATAATGAATATTACTACCATACCAAGTGACTGAGTAGTGGTGGAAGTCTCATTTTCATTCGCTAGCAATAACCCGCTACATATATCGATGTAGGTTTTTCACTGTGTGTGTTATATTAACACCCAACCAAACAGCATTTCTACTTGCATTCTCTCCTCAGCCACCAACATAATAGGCAGTGTAGTAGTAGTATTTGCCTAGGCTCACAGTTACTCTAATACAATACTATTACTACCTCAGTCTCTCAGCCTCACCTACCTCAATGAGTTCTCTTGTGCTTCAACTTCTGCTCTTTGTTGCATTGGATTAGGAGGGGAAGAGGATAAGGTTGGAGGTACATTCGAGCCAATCAAGATGCAGCTTTTCAGAGATTATGTCTATTGAGAAAAGAAAACA…
>Peanut_newGene_3715	Peanut_newGene_3715.1
AAAACTTGACACTTCGTGAATTTTTTTTTCTCTTTTTACCTGAAAGCACACTCAACTCACACATTCAGTGAAATTTTTTTCCTTTCCCTCCAAAGCTCATCACTCACCTCCAAAGCCCGAAGAAAACACTTTCAAAGAGCTCACCATCGCGAAGATCGAAAACCCTCTCGCTATCGCCATTGACCGTCTTCGCCCCCCACTCACCACATCGCTGCACGCACTCACCACATCGCTGCACACACTCACCACTCGACCGTCGCTCCTTCTCGACCCTCCTGCACTGATCGTTGCTGGGCCGCTCTCACCATCGTCGATCTCTGCGCTTCTCATCGTCCTCTCTGTGCTCACGTCGTTGATTAGAATGTTGAAATTTGAGAGTAAACCAAGTTGATGCATGAG…
>Peanut_newGene_3716	Peanut_newGene_3716.3
ATTATCACCTTCTCAAACAGTTACTGAGCTACACTTCTCCCCCTCAAACAGTCGTCGTCTTTTCCAATCTCGATGCCGTCGCCATTGTCTTGTAGACTCGCAGCCGTCATCGTCGTCTTCTTCAGCTTCAGCGCCGTCGTCGTTGTCTTCTGGACTCAACATCTCACGGTGCTTTCTCTCGCTTCTACAGCGACAAAGATAGGGTTCTCAGCGAAGAGGATCAGGCCAAAGAGAACGTCTATGTCAAGAAACGAGAGAGAGAGGTCGGAGAAACAGAAGTAGCAAGCTGAGAAGGAAAAGGCAAAGATGGACAAAAAGTGCTTCTAACAAGGGTACAGCATTTGTAGTATTAGCAAGATTGCTTGCTTCCTCAAAATTAGTTAAGGGAACCTTAGCTGA…
>Peanut_newGene_3717	Peanut_newGene_3717.1
ACAGCACCCGTTTTCATTAATACCCAACATGGTAGCTTCGTGATGCCGTTGCTTCTTCAACCTTCAGACATCATTGATGGTTAGACGCTTTTTGCTAGTGTGACTTGATTCTTTGGAAGCTTGTGATGCCTGAGAAGGTGGTGGTGAATCAATGGGGAGTGTGGTCCATTCCAATACACCATTGGCGTGTTGGGTTGCTCACAGCTTTGGTTTTGTTTGGAATGGTTCTTGTTTGGAGCATTGATGGATGCACCGTCAAGAATCTCATTCATACTTGGAGGCTTCGCCAAGATTATCATCTTTCTGTTGTAAGGGTTCATTCTCCTAACTTTACTCATTCCAATCAAAATCTTTTACCTTCTCATTATGTTGCCACTAGTTTGGATAGAAAAGCTCATT…
>Peanut_newGene_3719	Peanut_newGene_3719.1
AAACAAGCAATGAACCAAACCAAAGACGCTTAACTCCGATTACGCGAGCGCACATGGGTGGTACTCGGAAGCAGAGGGAACGGCGCTTGAAGCCAGCGCGTGAGAGGGGCTCACTTGCCGTTCTTCCAGGCGAACTGATCCAGGAGATCCTGTGGAGGATTCCGGCGAAAGACGTGGTGGAACTTCGCTGCGTGTGTAAGTCATGGAAAACCCTAATTTCGTCGCCGCAATTTATGAAGGCGATCATCCAGCGTACCTACGCCCACATTGCCGGTTGCGCTTCCAGAGCCGCCAAAGTTATGGACTCAATCTCGTTGTTGCTCGCTTCTGTTTCTGACGGCAATGCTACGGTTAATGATATTTCGGATGGCGTGAAGGCAAGCATGGAAGTTGTCAACG…
>Peanut_newGene_3721	Peanut_newGene_3721.1
TTTTTTTTTTTGGGTCAAGAATCCAGGCCAGTTACCTGGTCCAAATTCTAAACAATGATTCTTTCTACCTAATCCGACTTGGAAGACAGCGATGATCCCCTCTCTTTGCACGTAAGGCGAGCACGGCGCTTCTCCCAGCAGCTGCTCCCTCTCGTTGAATCGGCCGAGTGATCATAAACTAAATCTGCGACGACGCTACCAACTTTCAGTTGTAGCCCATTTATGTCAGCATCGTCAACCACCTTCCTTGGTCAAAACTGCCGCTGAAGCCCTCCAACGTTTGACCGGATCCACAGTCCGACTTCGCCATGCCCAGCTCTCCCTCTCGAAGCTCCTTACCTCGCAGAGGATGACCGCACTGCGAACGATTCTTTCTTCCTCCCTGGTTTCATTTCCAAA…
>Peanut_newGene_3722	Peanut_newGene_3722.1
CTTTTCTTACTTCTCTAGCAACATAATTTAGAAAAGTTTAATGGTGGGAGCTCCCAAATTAATAACCTTATTGAAAAAATGTTCAACTCTGAAACAAGCAAAAGAGATCCATGCTCACATACTGATCAATGGACTTTTCCATCTTGAACAACTCCTCATCCATCACATTCTTCTCTGGAATGTAACCAACTACAAAACTATGGCACACTATGTCTACCTTATTCTTCACCGTATGCGCAACCCTGATTCCTTCTCTTGGGGATGTATGATTCGCTTCTTCTCTCAAAACTGTCAATTCATGGAAGCAATTTCTCTCTATGTTCAAATGCAGAGGATTGGCTTGTGTCCAACTTCACATGCTCTGTCCTCTGCGCTTAAGTCATGTGCTAAGGTTCAGGA…
>Peanut_newGene_3723	Peanut_newGene_3723.1
CCCTTCTCCCATTTTACTCACTCGTCCATCTGTCAAAAAATTGAAAACTGATGAGGGGATCTTATAACAAAAACTGTTCTTGTACCACCTCACTGTCATCACAAGAACCTCATCACCCTCATTTCTGATCCCTTCACCATCTTCCCTATTCCGTGCTCCCAATTACACCACAGTCACAGAAACCCTGCAAAAACAATCCTTTACGGTGAATTACCTCGTCAACAATTGTGAGCTCCTCCCAGATTCCGCTCTTAAAGCTTCAAAATACGTACTTTTTAAGAGTCCAGAGAAACCCGACTCAGTCATCGCACTCTTCAGGAGCTTCGGTTTCTCAGATTTGCAAATTCACAATGTCATTCGGAAAAAGCCCCGGATTCTCGTCAGCAAACCCAAAGAGAC…
>Peanut_newGene_3724	Peanut_newGene_3724.3
GCGTGGGTTGGACGACTTAGTAGCAGACGGCACTGCACGACGGAGCAGAGGGAGTGGTAGAACGCCGTCGAAGTAGAGGCGTAGATCGGGCCCTGGCCGAGTTGAGGTACACCAGACGGGAGGCAATGGACGACATAGGGCAACCGTCGACGCAGGTACGTGGTGTCGATGTCCTTATTTAAAGTCCTATATTGTCTCTGGAACCATGGTGGAGGTATGCTCCCGAAATTGGTTTCAAGTGGGGGTTCAAGCTCAATAATCGCTTGATCTTGGAGCTCGAGCAGATTCGAAGGCTCAAGAGTCGAATCGAGAATGGAGAATTTTAACCCAGGCAGATCTTCAATGGCCCTCCCAAAAAATCGCCGACCAAGAAGATCTCCGGCAACAAACGGCCATTTC…
>Peanut_newGene_3726	Peanut_newGene_3726.1
TTTCATCTTTCATGAGGCTTTGATAATTGACTCGATGCTCTTTATTGCTTATTTCTTTTTAGTAATTTTATGGAAGTTCTATTTCGGTTCAATTCTTGTGATGTGCTGTTATCAAATTACCGAATTTAGGGTTTTTCTCTTCTTGATTTTGGTTTTGGTTCCATCGAATTTTGATTTTGGTCCATTTCCTGCGATTGTTAATTTTGTGATTGTGCCACTACTTGATTGTTAATTTTGGTTTTGGTTCCATGGAATTTTAATTTTCTTACTGATGCAGAGGTATATAAAGCAGAACAATGACGTTGCTCTCTGTGCACCAGGGATGGGGGTGACCATACAGTAAAGATAATTGATTGTGAAACTGGAAGTTGCGTAAAGGTGCTAGGTGGTCATAGAAGG…
>Peanut_newGene_3735	Peanut_newGene_3735.1
AGGTAAAAGATCAGGCCTCCGACTATCCGGAAACACAAACAGAAAAGGTGCATGCGAACAATAGTGACGATAATGGTGAATAACCTTTGCTGGTGCACGAAGGATGTATGGAGGCCCCATACACTCACACTGGAACACATGCTGATGTTGGATTATACGGGATCACTGGAGCCTTAATAAATGATGTTAAATGACCATCTTCCTTGCTTCGGGTTGGATAAATTAGCTATCTGTAAACAGTGCCTGGAGCCGTATTCCTTCCGCCTAATCTTGTTGAATCGGTACGTACTATTGTACTTAGCCTTGTGTATGCCGTTAGAAAATAAGCTGTTCAAATTTTGTCCGGAGAAAACCGAATAAATGGGGTTTTGTTTTATTTTCTTGTGGGTCATTTCGAAG…
>Peanut_newGene_3740	Peanut_newGene_3740.6
GGGCATGTTGCAGCGAAATTCCAATATGACCAGGTTATGGATGTTCCCGCTTTCTTCCTTGTCCGAAGCAGAGAAGGTTCTAGGAGAAATATCTAATTATAAAGTTCAGTTGGAGGCGGTAAAAGCCAAAATCAAGTCTGCTAAATCAAAAGATGAGTCTGAATCTCTTAAATTTACTCAAAAGAAACTGATTAACAAGGTTTGCATGGAAGAAGCCCTGAACATTATTTTGACTTGTACAAGTTGTTTGGAAGTTTTTCTGATTACCTAGAACTATGATAGGTCTATTGTTTTGACTTTTTCTTTGATTTTTATCTTTTCTTCAACATTTTATCTTTCTTTTATATTTGCCTTTTCTCAGGCCTTGGCCAATATTGGAGTAGTTTAAATCATTTTGAC…
>Peanut_newGene_3745	Peanut_newGene_3745.3
TGATTAGTGGCATGCAAATATGGATAAATGGGATCTTGAACTCGGTCTTGCTCTCCCAAGCAATTCACCTTGTGCAGGCTCTAATGATGATATGGAGGAGGAAGAGGAAGAAGAAGAGGAAGGGGAGAAGGTTACACATCCCACTCTGTGTCTCCTTCCGTTAACCCCTGGCCACTCATGGAGGAAGAAACGGCATAGGATGTATGTGAAGGTGAAGATGGAAGGTGTAGGGATTGCAAGAAAGGTTGATCTCACCATGCACCATTCATTTCACACCCTTAACCATGCCTTGCTCCACATGTTTGGAAAACCCCCTCATCAATTCTCAAACTCCTATCGCCTCCTTTTTCAGGACCAACAAGGCCATTGGCTTCTCGCCAAAGATGTCCCATGGAGAAC…
>Peanut_newGene_3746	Peanut_newGene_3746.1
ACGGGAGGGTCTAGGGTTTACGTTTCACACCCAAACTCAAATTTCTTGACCACTCCCCAAGCCAGTGTAGTTGTAGAGTAGAATGGAGGTGGCTGTGGTTCGGAGTCTCGCCTTCAATGACGAGAAGACCTTTTCGGTGCCGTCTTTTGTGGAGGCCATGGTGGTCGACTCTCTCCTTGCTGTTGCTGCTGCTGCCAAATCTCTCGCTTACCTTCTCATTGCGTCTGGATCTCTTCTCAAAGATGTCAATAATCCTGTGTCACCAATGGATGGAAGGTAACAATGAAGTTAACTTTATTACTTGGTGTTCTAGTTGTTTTGAGTTCAAAGATCAAATTATCCTGATTTTACTTGATAAATTCTTGGTTAGGTTTCCTCTAGATCAGTTGTTGTACAGGG…
>Peanut_newGene_3747	Peanut_newGene_3747.1
ACTAGCGAGTCGAACCCGCTTTTTTGAGAAAGGAAAAAAAAAAATCCCTCTTCTCACTTCTCTCTTTCTTCTTGTTTCTCTCTCGTTCTAGCTGCTTCTTCTGCAAAACAGAAAAAAATGGCGGTAACTTCTAGAAAATCAAGAGCACCAGTGCTCCGATCTCTCTCACCATCTCCTAGATTCTGCAACAACAATTCCCACTCTCCATCATCTTCTTATTCTTCCTCTGGTTTCGCTTCTTCCAGTTCCAGTTTCACCTCTCGCTCCACCACCTTCTTTCACCGTGCCACTTCTCCGACACGTGTCAACTTATGCGGACCCTCCTCCGCGTCGGCCTCGTCCGTTCGGTTCTCCCTTGACCGGTCGATTTCTCCGAACCGTTCCATCTCGGTGGCGCCT…
>Peanut_newGene_3749	Peanut_newGene_3749.1
AATTAAGTGACCGTTTCTTATAAGCTGTAAAACATTCAAATTGTAGATTCAGACAAGAATTTCACAAAGGCATTCATTCATTTTAGCATTTTTAGTGGTGAAGAAGGAAGGGAAAAAATGGTGTACTCTTCATATCACTACACACCCAAGTACTATTCCACACTCCAAGACTCCATTGCCACACTCTGTAAATCCATTCTTCCTTTCAGCTTCAAGAAACGCTCTCTCCCGGCCTCCGAACACAACCTCTCCAAGCTCCAATCCGATAACCTCAAATGGCAGCAGGACTCTTTCCATCAGGTTCTCAACCTCATGGCCCTTCACTCTGAAGGAATTCTCGCTCAATCTGAGGTCACTGCTTTCAGAACTAACTTGCTTGACACCCTCATTGCTTCTCCC…
>Peanut_newGene_3752	Peanut_newGene_3752.1
CTTTCTCTTCGAAATCACAAAATTGCCACCGCGACGAAGTTGAACTCCGGCGACCGGCTGTCCTTTCTCCGTTTGTCTCCGGCGAACCTTCGTGAGATCTGCACCTCATTTCTTATTCCGTTTTGGATCCTCCTTTCGCATCTTGCTTTTGTTTTTTGATTTTTAGGGGAAAAAAAACGAAATAGAAAGAAGAAGAAGAGGAAGAAAATAAAGATTATCTGATCAGAGCAAGTTTTTTTTTAGCAGTAGAAGATTTATTGCAGAGGAAAGGATCTTCTTTCTGGATAATCTGTGCTGTTCATTTATTCCATTGATTGCCAAAGCTGCTATATCTAGCCGAGTTTCATGAACACTAAGATCAATGTGGTCTAACTGTGATAGAGTGGATGGATGTACATG…
>Peanut_newGene_3757	Peanut_newGene_3757.1
GAAATTAATATAACACAAAGTTGAACCATTATTGCTTTGCTTATTTGACTTGTACCCTCCATGCAGATGGTGGCAACTGGCAACTGGCAAGTGCTCTCTTGAATCAAATAGCTAATGATGACAAAGGGGAAGATGACATATATAATAAGTTATCACATTGGAGCTCTGGAATTTGCTTTATGAAAGCCTTGGTGGTGGGTGATATAGGGGCACATTCTTTAGTTAACAGTAAAGAAAGATCAAAATCTACATGTTTAGTCATAATCTTAGGCCAATAGGGTGTTTGAAAATTGCCCATTTTCTTAGCAATGTGAGAAATATAGGTGTGACTTATGATTTTTTTTTCCCCTTTATATACTCTTTGATTATAAGCGTGGAATCAGCTACTGATGTAATTAA…
>Peanut_newGene_3761	Peanut_newGene_3761.1
GTCTAAGCTTTTTCCGTTTATGGCTCTCTCTGATCAGTTTGGCCAATTCCCTGCTGATGGGAAGATGATCAATGAAGTGGGACACATAGGTGCCAGTTTGCAGGAGGTTGGTGCTCGCCTTGTATCCATTGGTCGGACACAAGAGCTTGAAAAGGAACAACTTGCTGCTCGTGTAAAGGAATTGGAAACTAAAGTGTCCGAGGCTTTTGGTCAAGGGTTCTATCGAGCCGTGACCCAGGTTAAGGCTGTTTTTCCTGAAATTGATGTGGATAAGCTGGATGTGACCAAGGTGGTTTTAGATGGGAAGCTTGTGGATGAAGATGCTACTGGTGAGAAGAATGATTGAAGTTCTTCATTTGTAATGGTTTGCTTTGTTTTTTCCGTATGTTTGTAACGGTC…
>Peanut_newGene_3762	Peanut_newGene_3762.1
CATTGTAATGAAGTAAAAGTGCCCAAATGGCAGAGATGTCATCATATAAATCTTATACAAATATTTTAGCTTCAGGTGAAAAGTTCACGGATGTTAGAGATTTCATTGCATATATATATAATGGAGATGTAAAGTGGATTAATGTGTTGGGAAGCAGTAGTGTGTTTTTATTTCAGGTTTCATTTTAATTGATATCTACACTAGTAAATTAATGACTGATGTGTATCATATCCACACTACATGTGGACTTGCTTGGATTATTCAATTCAATGCTTTGCTTCGAAGATAGGAACCATAGATGGTTGTTTGGTTATCAATATGCTACACAAATGAGTTTCAATATCTAATGCAAAGGTTGTATCAAACTTGAATTGAAGGCTTTTCTTTCTCTG
>Peanut_newGene_3764	Peanut_newGene_3764.1
TTCTCTCTGTTACTATTTCAAATTCAAACACTGTCCTTTGCCCGGCAAACGCTATAAGAAGAAGAGTTGCAGCTAAACTCTTCATGAAGATTTTCCAGAGGCATCAAGGGATAGATAACTGCTGTGCTGGAGGATTTGCTTTCTTTCTGGTTTCAACCATTAAAATGCGCATTAGGCAGCTTCTGTGGCAATTGCAACTTGGTGAGCATGTAAGTACATTTGTCAAAATTTTGCATTGCGGTATTATTATTTTGATGTCAATCTTCTCTGAAGCTGAATCTGTCTCTTTCGGTTCTGTTTTTGAAGCTAAAAAGGAATGCAACAATGTTGAACACATCATTGTGTATTTATCAAGCAGGTTCTTATCATAGTCCTTCAACTTTGAGGTGTGATCGCTGT…
>Peanut_newGene_3778	Peanut_newGene_3778.5
TCGCATTATAGTCCACAGCAAACCCAAAAATTATTAGACTAAAATAAGTACTCAAGTCCTATGTGCTTTCGTTGATGCTGATCGTTACTCTCTCTCTCTCTCTCTCTCTGTTCAAAATTAATGGCTCTCAGGGATTTTGCGTGAACGACTTCGACTTTTGATGCCTACTATTGACGGTGAGGAATTTTGATTGAAGGAGATGAGAGGGAACCTGACCATCGTAACAACTCAAGCGTGCCCGGTGGAGTTGTCCAAAGCATTGTTACCCCACATGACTATCATGTTTCCCGCTATGTCTTCAACGTTTTCCTCTCTTTCTTTGCGGTTCTCGCGTTTCTCTTTCCATGCGCCCGCCTTCTTTTATTGCTTCTGGCCACTACACAACAAGAGTTTTCACCT…
>Peanut_newGene_3787	Peanut_newGene_3787.5
TTGGATCGGATTTGTTAGGATGAGTGAAAAACTAATGAATCGAGTTTTAAATGGATCTGATTTAAGGAAGAAAACTAACCAAAATCAGACAGAATCAGTTTATGAGTTCATAATGAATGTGCTGCTTCAAAAGAAAATCTTACCTTCCAAACTAAATTTGTTTAATTGTTTCCAATATACTGTTTAAAAAGAATGATTGAGTTGAGCTCAATCTTTCTGCTTTTGATATTAGAATTTGAAAACAAATTTTAAGCGCTGTCTTTCTTTTTTGAGTGCACAGATTTAATTCAGGTTTAAAAATCAATTCTTTGCTATATTTTGTGTATCTCTCTTTCTCTTCTTTCTTTCTTGCGTTCTCTTTCTCTCTGATTGAGTGGTGGTTCAAAATACATGGAGATA…
>Peanut_newGene_3789	Peanut_newGene_3789.1
TCAAATTAAAGAGTGTCGTTTGCTAGGAGAACACTGTAAGAAGAAGCATCAACAAATTTGGCCAAAAATTTCCCACATCCCCACCATTCAAGTCAATGGCAACCAAATTTTCTGAATAGAGATTTCTGAGCAGGTAGCTTGTGTACATAGCGAGATGTAATCCTATACCTTTGGCTATATATCTTCATTTTAATTCTAAGTTCATTTGAGGTGGTAATTAAGCTGGATTGATGTGCTGGGAACCAGAAACTGTTTTCTCTGATCTTGGCTTCATGTTATTGAAAAGCAAAGACATGATGGAGAAATTTGGAGTGACACTTATTATTGAAAAGCTTTTCTTGTTGTCGATTTGGAGACTTTGTCAAACAGATTTCACAAGGTGACAACTAATGCCATCAA…
>Peanut_newGene_3793	Peanut_newGene_3793.1
CACCGAGGCCCTTTGCCGCCTCCTTCTCTTTAAGGTGGGCGCTCGGAAACCGCAACCGCAACGCCAAAACCCCCAGGCGGTTCCATTTCGGAAGGCTGCCACTCCCTACCACCGGAGGTATCAACCCGGTTCTCCGACTCGGGTTGTCGCCTCTGAACCCGGCTCGACGTAGCCCTCTCCTTATCAACCCTGAACCCCACTCTAACCCGAACCGGTTCGCTTCTTCTCCTCCAAAGGAGAAAATTTTGGTTGAACCGGTTGAGGGTTCGGAGAATACGCCTGAGGATAAGGGCACAAACAACCTCTTGCTCCGGTTTTGTGTGAAAAAGAGGGACCTTTCTGCTCCCAGTGCTGATACTGAACCTGAACCCCAGGCTGAGGCTAAGGCTAAGGCTGAGG…
>Peanut_newGene_3796	Peanut_newGene_3796.2
CACAATCAAACAGATCAAACTGAATGTGAAGGAAGCTATGAAGCCACCTAACGGAAGAAAGGTCGTACTCAGGTTTAACAGTGCACTGCAACCAGTTGGGGATGAAGCAGGTCTACTGAGCGGCGTTATGGGACTGCTAGGATCTGACTACACCAAATTCCCAATCTGCGAGAGGGACTGGAGAAAGGTTCGCACCAGGGACAAGGTCTATAATGAAATAGTAAAGGAAGGGCTTGGAAGGAAATGAGAAACAGATTATACCATCACTGCTATGACCCCGAACTTTCACTTGCAGCAAATATTGAAAACCGCCCAGATGGAATTACTGCGGACCATTGAAGAAAGTTTCTCGATTATCGCAATAGCGAAGAGACACAGGTAATATAGTTTTGTTTCATA…
>Peanut_newGene_3797	Peanut_newGene_3797.1
TCTAATGAAAATGTCAAAATGAACAGACACGAAAATCATAATTGAAAATGAGAAAGAAGAGAAAAAGAACAACTGGTGGTAACCAAGGAGAAACAATTAAGCAAACAAACTATCAGGAACCAGAAGGGAAGATTGGAAAATAAAAAAAGGTACTGCATGGTGCTTTTTGCAGGCATTGCAGCTGAAGCTCTTGTTTATGGTGAGGCAGAGGGGGGAGAAAATGATGAAAATCTATTCAGAAACATCTGACTTCTTTTGGAGCCCCGATTATCTTTAACTGAGGTATCTCCACAGTGCACAATCGACGCCCCTGTTCTGATGGTATATGTTCATACGTGATACTGAAATTTCAGCCTTAACTTTCTTGCCTCGAGAAGATGTCTATTGTCTATTCAAGAA…
>Peanut_newGene_3800	Peanut_newGene_3800.1
CTCCCCCATTCTCCTTCCGTTCAGTGTTCAGAAAGACTCTCCCCCATCCTTGTCTCCTTCATGCTTCAGCTTCACCTTGCTACTCTCCCCCATTCTCCTTCGTGACTTCGTCCTTCCTGGCCTCCTGAAGAACCCAACGGCTGAACCAACCTTCCAAAATCGCAGCCACCCCAGCTCTGTCTCTGTAACCTCGGTTCACCGCCACGGCGCCACCGCACGCTCACCTCCGTCGCCGCGCCTCTCACCGGATCCACCAGCTTTCCTCCGCTCGCGTCTCGCGTCTCTGCCTCCAGCCGCCTGCGTCTCGCTCGCGTCTCTGGCTCTCTCTCTGTCTCGAGCTGTGCTTCCTGCAGCCGTGAGCTGTGCTTCCCTGGTGCGCTCCACTGCTTCCCTGCCATT…
>Peanut_newGene_3801	Peanut_newGene_3801.1
AGAATACTTTTGCTATGCCTAGAAATGTCAAACTGCATGGTGTCGCTGCAAATAGATCAAAAACAGAAGAAGACGATGAAAAGCCAAAATCCAATGATGAATTCAGAAAAATGTTTATCCATTAAGGGTAATCCTGAATGTGGTGCCAATACTTTGTAACTCTGAGGATAGCAGTTATCTCTGAGATGTATTTGGGTAGAAAGTATGCAAGTTACCTGTCTTGTATGTCACTTTGTTCTTTTGCGTAGTAGTAAAAGAGTACCAATTACTTATAGGCATCCTATCCTATCCTATAACTACACTTGAAATTGATCTTCATTTTCAAGGCGTTCCTGGTGTACGTTCTTTTGATTTTGAAATTTGAAGTTTAAATATATATAAGCCTATCAAACATTCAAA…
>Peanut_newGene_3812	Peanut_newGene_3812.1
AAAAAATATCACTTTAGTTTCAACGAAATTAAGCATTATAATTCTACAATGGCAAAAGGAGTACTACTTTTTTTTCTGTTGGTCTTTCTAGTATTAACGCAAGCAGATTGCATGAAATCCTTCCATGTAAGAAAATGTTGTTGGGAATATCATCTTGGTAATGATGTTTGCGTTAACCGTACTTGCAATTCAGTGTGTCAACAACATTGCAAAGGAGGACATTGCAGAAATTATGATAAACATATATGTCATTGTGCTTGTTAATTAATTATCATGATTCATAGAAGAGTTATATTATGAAAGCAAAATTTTCAATAACTATATTCAACTTATATTATATTGATCAGTAAATTATCGATAAAAAAATTATTTAGACTATGAATAAAATGATGAATATTA…
>Peanut_newGene_3815	Peanut_newGene_3815.4
AGCTAAATTACACTTTACATAGCTCGTACTAAATCTGGGCTACCGGCAGCTATTAAGCTCCTGATAATTTAGCAATTACCCCTTTGGATTCTTAAGTTTGGGCCTCGTGTGTTAATAACTTTGGGATATCCATTTTCTGTCATAATAGAACCAACTGGTACGTATTTCCTTTCTTTTTCTCACCTAAGAGTAACATGTGGCTGTTTATATATGCATTATTTGAAATTTTAACCTTTTTCGGCATTCACTTTCCACAATTCGGGGCTCTCACTCACAACATTAGGAACATGCACAATCCCTTGCATGTGATCTAAAAGTTGCTGTCATTTTCTCATTAAGATATGCTGAATGGATTTCTTGTTTTTATTTAAGTTACCTTAGCTTATATCATGGATACAA…
>Peanut_newGene_3816	Peanut_newGene_3816.1
TGACTTTGTATTTTATTGGTTGTTGTTTTTTGATAGACTAAACTTCGAAACCGCTTAGAGGCAGGAGAAAATGATGAGGATGCATTTGTAGGAGTGTTAGGAAAGGACCAACCAGGTCGAGTTCGTTGTTATGGGGCTTCGATTACAAGAAGCTCTCTTAAAAAGGATGAGGAGATTCACCACATAAAAGTTGAATACAACGCTCATGTCTCATCATTAGAGAAGAAGATGGACGGTGTATGTGGTTTATTAAAGGTATTGGTGCACCAAATCAACCCTGGAATGAGCGATGAAGAGGTAGCAGCCTTAATGCAAGCTGCCCAAAATTCTTCTTTGGATACCTCAAGTAGCAGAGCAAAAAATACTCCCTGCTCCTCCGAATCAACTCACATTCCACAC…
>Peanut_newGene_3821	Peanut_newGene_3821.1
CTTGATTCGTAGGTCACAAACCATAATTTGAAAAGAAGTACCAAAAAGATGAAATTATTTTAGAAATTATAAGCCAAACACAGCCTTAATCTACGCTCATCTTCTACAACAACTCACTTTCCTTGTTTCATGCGACTTTACTTTTGTTTTCACTTTTTACTTTTGTCTCTTTTTGATCTTTTCTGTTCTGTTTTCTCTAGTGGTCCAGAAGCTTACTTGCGTTCTGCAGGGTCAGTCTTGTTGTTCAGTTTCTTTCCAAGCTTTCATTTTTCTGTTAATTTTGAATGCAAATCCTCCTCAGTAAGCTTAAAGTTCCATTTTTTCTTATCTGGGTCATCTTGGCAAAAACAGAACCATTCCAATTTTCATTTAGCTTCCATTTTTCTTGTCTTAAACAGC…
>Peanut_newGene_3824	Peanut_newGene_3824.1
TATTCTCCTAATACTGCTAATCAGAATCCCTTTAGTTTCTTGTTTCTTTGTTTTTGGGCAGGTTGGTTTGCATCACGAAGCTAAGGACTTCACTCTCCCTCCTGGTAATTAAGGAATCAATATTATTGATAAATTTTGATTTGTCGCACTCAGAAGAAGCTAAACAAGCAAAAGCTAATAACCACTGGATAATGGATGCAAAATTGGATGTGGAGAAGGCCCCTGAAGAATTAAATACCATCAAAATTGCCGCTAATGAGAATGTGGATGGCCGAGATGTGGAGAATGGCATCGTGATTGCCTCGGCGAAATCAGATGCCAATATTTCCTCTGATGAGAAGAAATGGCAGGCAACATATGGAAGAGATATTCATGCTACTAAACTGTTGCTTGGGGTTG…
>Peanut_newGene_3833	Peanut_newGene_3833.2
TGAATGTATAAAATGGATAGTATGATTCTCCATGGGGTCTTTTATTATTTCTGGTGGTAATCATTTTGTTAAGGTTGTTTTTCTTAATGAGATGGGGGTTCCTAGTTTCCTACTATGTATAAGGATGCATGAAATTTAGCATGAGATAATGAGTTTAACTTTTATCTGGATAAATAACAAAAGAAATGGCATGCCGTAATGTTTTGTTAACTTGATTTTGGGATGATAATGGATGATCAAGGTTTAACATAGATCAATAAGGTAGTGTTCGGTTATTGCCTAAGACAGAGGAGACAGAAACTAAGCCACTAAGGACAAAAATATGTTTGCAGAAGGGGATGGAAACCTGGATAATTTTTAGGATAGTTTCATTACTTCCAAAACAGAGAGGGACACAAG…
>Peanut_newGene_3837	Peanut_newGene_3837.1
GCTAGAGCTGAGCGTCCAAAGAACGCGTACCTGAACACTGGATAGAAGGGTCTATATATATGGCGATTTCTCGGCCTCTGTTTCAGAAATCCCCAAAATTTCCATCCCAAATTGCTTTTCTTTCATCTCCTTGCATTCTTTCTACACTTATGCTCTTCTCTTTCCACACCTCAAAGCCAAACTTTTCCGAACTCTAACCCTAACCCTAATTAATCATTCTCCCCTTCTCCTTCAACCGCACGCGGAGTTGTTCGTGATTCTCTCATTCGAGAGTTTCGATCGCAGAGGCTCGTCCAAATCCGAGTTCGCAGTTTCGCCTCCTTCACGTTCTTCCCGAGTTGGGTCGGTTGTCGAAGCGCGACCGTCGGAAATTGTTGCTGTTCTTCCTGCTATCGATTC…
>Peanut_newGene_3840	Peanut_newGene_3840.3
TTCGAAGAGAGAGAATCGAAAAGTGAGAGCTCACCGAAATCCTAAGTTCATGATAGACATCTCCACTGTCATGCATCTCCATCGCCGTCTCCTCCCCCATCGCTGTCTCTGCCGCCGCTAGAGTTCATCTCCTTTCTGCTTCTGCCATAAAGCTATTGAGATCGAGCTAATGCGCCTCCTTCATCAATGCGTTTCCAGATCTCATCGCAACGCCCAAGCATTTGAGATCGAGAGAAAGTGTCTCTTCGGTCAACTCTCTTCCGCCAATGACGCTCATGTTCTCCTTCGGCATTCTATCCCTTCTATGCACTCTTCTTTCCATTCATTCTTAGTTTTTGGTTCTCCTTCTCTTTTTCTCGTTTTTTTTTCATTTGCAGATTTTTAATGCTTTGCTATGTG…
>Peanut_newGene_3841	Peanut_newGene_3841.2
AAAAAAGATAGTATCTAATTACCCAGCCTAACCCTAAGCCACCCCACTCCCCACCATTCTCATCTCCAATCTTCTACTCGTCGTCTTCTTCCTCCCACGGAAACCGCCGCCTCATCTCCTGCTTCCTCCACCCGCTCCGGCCAGGTTTGCCAGCTCACGGAGGAAGAAGCAAATCAGATTTGTTTTCAGGTTTTTTTTTTGTTCTCTGTTTTTGATTCTTCGTTCTTTGATCTGATCTTACAACCCTTCCAAGAGAGAGAAATCGAGTACTCCACACACACCCTGTTCTATCATATGAACCTCTCTCTCTAATACCATCGTAAAAGTCTTCCGATTAGGTTTTCGGACACAAATTGTGGAACCTTCTTGCATTTCACAAATCGTCGAAACCGAGTCGCT…
>Peanut_newGene_3844	Peanut_newGene_3844.1
GCATAATGAAAGGAAGAGAATCTAACAAGAGGGCTCGAACTCCTAATGATTTACTAGAAGAGAATTGAGTGGGCATTCACCACTTCCATCAATAATCTTCGGGAAGCTCGTTCTGTCTCTTCTCGTGGAGTTTTTTCATATTCAAAGAGCAAGCAATTTCGAACTCTCCAAATATTACAGCACATAATTTTAACTAGGAGTAAGGATTGTTGGTCACCTCCACTCCTCGATAGGTGAATAAGCAGTACATAATAGATTCCTCCTCTAATTGACACTGGAGGCAAATCGCAGAAATTGAAGGAATTCGCTGATGAAGATTCAACAAGACAGGAAGCCTTCTATGGAGGGCAGTGATAAACCCATATTTTATGATATATTTTGTGCTCAATTTAAGTGATT…
>Peanut_newGene_3847	Peanut_newGene_3847.1
GTAGAAACGGAATTAGACAGGGAGAGATAGGAAATCAGAGTGTGATCCAAGGAAGGAGAGGAGGGAGACACCGTCGCCACGCAGCCACCGTTCAGTCGCCAGAGCCACCGCTGGGGGTTCTTCGCCGTCACCGTCGTCGCTATCCACGCGAGTTGCAGCGCTGCGAAGTCCAGCCACCGCGACCTCCGTGGAGCCCGCATTGCTGTCACCGCCGTTGGACCCATCGCACGCGTAGTCGTCCAAGGAGCACCGCTGACCATCGCTGCTGCCACTAGGGTTTACCGCCGTTGCTCTGCCTTGCTAATGCCATCAGAGCCGCCGGTGAGGAAGGGAGCCCGAACGCCGTCGCTGGGAAGGAGGCTTGGCCGTCGCCAGACAGAACGCGATGGTACTGAGAGG…
>Peanut_newGene_3852	Peanut_newGene_3852.2
TTAGATTATCATCATTACAATTAAATAATAATAATTACAAAAATAAATAATAGAAGCGAGAGACAAGTCCCCCAAATAGTAATAATAATAGTAGCACTGACATTGGAAGTAAAATATGGTGAAATAGAAGCGAGAGGGTGTTGAGCAATGAAAAATGACTGCAAATAATGAACGGGGATATAGGTAGGTAGTTAGCTAGAGTTTGATTAGATTATCTCTCTCTCTTTATCTCTTCTCTTTGATTTCTTTTGCTTACTATAATTGTTAGTAGTTATAGCCATACTTTATTTGATTAGAGACCCACATATAGGCTTCTCCCTCTCTTGTTACACGTGCAATGAAAGAGCTGGAGTATTGAAAAAGTGGTAGTTATACATTTAGATTGATTTGTGTACATGT…
>Peanut_newGene_3863	Peanut_newGene_3863.1
GGACACGCTCACAGGTTCACTATATTATAAACAAAGAGTCACATGGAGACAGAATCGGAGAGTGCCGTCTTGAGCACCTCAGCGTCATGGAACCTACAAAACGAGTTGAATCTGAAGGTGGCGTAGCTGAGTTCTGGGATGACAAGAACCAGCAGCTCCAATGCATTGGTGTCACGTTGATTCGATACACTATAAGACCCAATGGCCTTCTCTTGCCATTTTACACCAATGCCCCCAGAATCCACTATGTTCTCCAAGGTCA
>Peanut_newGene_3867	Peanut_newGene_3867.5
AACCCTAATTCCCTCCTTTCGGCGACCATTTCTTCTCTTCCAACCACAATATTGAGCACCAATAGGGATTACAAGATTCTTACTCACCTTAATTACTCACTTCAAAAAGTAACACTTGGATGGTGCATTAGAGCTGACGCTCAATTGGATAAGCAAGTTCACAACATTTTCTGATTTTGATTCACAACAACAACTAATTGCTGACCTTGTGAGGATACAAAATGATGGGACTGTTAAAGTTAATCTAGAAAGAAGTGCATCTGTTGCTTCAGAATTGCTAGAATTCTAGTCATTTGACGAGTCAACAGCGAGTGAAAATCTTATTCGTGAAGCAAAAACATCAATTCCACGGTTACAAATTGTCATACTTGTGGTTGGAACTAGGAGGTGACATACAAC…
>Peanut_newGene_3871	Peanut_newGene_3871.2
AAGAAAATGACACTTTACTAATTGAAAAAATTGACACTGAAAAATTTCTTCTTCTTCAACCTAGCGTCCTTCTAACAGCCATTTACAATGGTAACTTTCTTGCACTCAAAGACCTTACTACTAGCTCTCTAAGAACTTCAGGTTCAAACCAGGATTTGATTTCTGAACTACTATTCTTATTGTCTTCGGGAATTTCTTCAACTTGGTATCAGCTCAATCGATCTGATAACCATCTCAAGGTATTGCTCTTGAGATGTCAGAAAATACATGTTTGGAGTTTTCTACTCTAGTAGCAGTAGGTATAGTAGAATTAGATGCGCTATTATTTCCTATATTAATAGCATGTAGCAGATTTTGTTGTTATATATGTGAATTTGCCACCCCAGAAATAGGTACATT…
>Peanut_newGene_3873	Peanut_newGene_3873.1
TTTGAGTTCGCTGAACCAAGACACTTGGATCTTCAGACAGTGACCACTTTTCCCATTAACAATGACAAAGTCTCCTTGACCTTCAATTCAATTCTTGTCCACATCTCTACCAATAAATAAATTAAAATCTTCTCATTTTCTTTCTCACTCGCATATTCATTCATCACAATTTTCTCACCCTAGCTACCTCTTTAATTGCTGCCGTACATATTCACTATCACGGGCCTGCAAGTACTCTCTAGTAGTACTTTGTCTGGATACCTTGTATCCTTTTTCGACAACAGATTAGTTCAAATTCAATTAGCATCTATCAGAACAAGTTGGGTTAAGGAGTAACTTTTTTTTCCGATTAATATTATTTTTTATGCAGTAAAGAGATTTGAATGTGTTCGAATATAT…
>Peanut_newGene_3875	Peanut_newGene_3875.1
CTTCTTTTCAGATTTTTACTCCTCATTTGATCAGAAACCCAAACCCTAGCAGAGCTCCAATCCCATCGAAACCAAAACCTAGCTGAGCTTCTTCCCCAAATTCATGGAGGCTCCACCGGCGTCAGCACCGTCTCACCACCGATTTGAGTTTGCACGACCACCCCTCACCTTATTCTAGAAGGAAATTCATTTGCGTTCGCGTTCCATCATCGCAGCTCACATCGGTTCACTGCTGTATGCTTGTCGCCGTCGCTGCTGCGCCTTTAGCCAGATCCTCCGCGTCGCGTGCTCGCGTTTGGTCTCTCTCCTCCGTCACTCTCTTGCTTGGCGTCGAGTTCACCGTCGACGAGGAAGCTTTGCCACCGTTTCTCCAGTGCTTCGCATACGGGGATACTAAAT…
>Peanut_newGene_3884	Peanut_newGene_3884.3
GAAACAGATGAGGGCTCGCTCTCCCTTCTATCCCTGATCTCCCTCGTCTCTCTCCATAGCTACCTCTTCAACCTCCACCGTCGCTTCCTCTTCAACCTTTAACCATCCCTTGTTCTAGGTTGCACTCACCTCAGATCTCTGATCTCAGATCTCAGATCTCAACCTTTCAACCTTTCACCCTCCCTTCTTTCGGATCTCAGATCTGCCGTCGATGCTGCTCATTGCCACTGGTCTACTACACTCCTTCACGCCGCCGACGGCTCTTTCTCGCCGTTGCTACTCAGCTTCTTTGAGGTTATTTTAATGTTTTATGCTGCATGTTCATGAATCTTCGCTTAACATCCCTTTTTCCTTTTGATTTTCCTTTTCTGCACTTCGCACTTCGCACTTCCTTCTGAG…
>Peanut_newGene_3885	Peanut_newGene_3885.3
CAAGCCATTTTTTATTTCCCCAATTCCTCAGACTTTCTCCTCTCTCAACTCTCAACCCTAGGTTATAGCCTCCGCCACCGCCGTAAGGAGAGACTCAGCGCCGCCGCTGTCCATTGTGCTCAGGGGCCAGCACCGCAGGAAGTGAGAAACTGCCATCGTTCACTGCGTTGTGGTCGTGCTCCAAGTCTCCCCTGTTCACTCTCACGGTCTCACCAATCGCAGCTTCTTCTTCGAGTTCGGTGTCCGACGTTGTCTTCTTCTACTCAGCCCCACTTCATATGGCTTCCCGTGGTGGCTCCGTGGACTGTGGTAACTAAGAAGATCATAGCTACTGCAGAAACTATTAGAAGCACCAAAATCCCAACAACTAATGCTACATTACTACTACAGGAATAGGTT…
>Peanut_newGene_3888	Peanut_newGene_3888.2
CCTCTCTACTCTCACTCTCTCAGTTTCGCTCTCTGCACTCACTCTCAGTCTCACTCGAAGAAACCCAGGGCCGGCGGCGAACCCCTTCCTCCCACCACCTCGTAGCGCCGTCGAAGCCTTCCTCCCAGCGCCACCAGACCATTCTTCCCAGCCCCTCCTTGCGGACAGCACCACCCAGCCCCAGCCAGCACCTCCCTCACGGTCATAGACACTACACCACCCAGTAGGCCAGCACCATCCAGCGGCACCCCAGCGCCACCAACAGGACCGATCTGGCCACCTGCAGCACCGTTTGTGGTCACCCATAGCAGTACTGCTGCGTTTCTGGCCTGGCAATGCTCTTCCTCTTTCCCATCCACTTGACTTCAGGATATAAGAAGAGAACTTGGAATCAATATA…
>Peanut_newGene_3891	Peanut_newGene_3891.2
CTTACTTGCCAATCTTTGCTTAGCCAAAACTTAATATTCCTTATGAGATTGTTGAAATGAGAAGGCTTTCCATTTCTCCTTCCAATACTATCAATTACTCCCTTTGAATCAGACTCCAATATAACTCGCCTGCAACCTAATTTCCAAATAGTTTGAAGACCGTGGAGCACTCCCCATAATTCCGCCTGAAAAGTTGTACAATTTTCCAAATTTGCACAAAAACCAGCCACCCAACGACCTAATTCATTTCTAATTACCCCACCACAAGCTGCTAGACCCAGGTTTCCGGCAGAAGACCTGTCTGTATTAATCTTAAGCCAACCAGCATCAGGAGGTTCCCATCCTATGTTCACATTCATCACCTTAGGGACCAGTCTCATCAAATTCCTTCTTTCAAAG…
>Peanut_newGene_3893	Peanut_newGene_3893.1
CATGGCTCCACTACTTTATCTTTTGACCAAAACCACAACCCCTTTTTCTCCCTTCTTGATCCCTGATAACAACAATTTCTCGTCAATTATTTCTCACCCTCCCCAAATCAAATTCTTTACGCTGTTCATTTTTCACACCTCATTGTTCCCACTCCAAAGTCCAATTTTCCATTTGCCTCAGTTAAATTGGTAGGGATTTGGAACATTTGGAGATTTTTAGAAGTTTCAAGTTACATATTTTTCCTCAAATGTTAAGGAAAAGCAAAAGGGTGTGCTTTAGCCCTGAGTCAAGTGACAAAACAACCATATTTCTCAAGCATGGTACTTGTGTTGGCTATGACAGCAGTGGAGGCGGTGGATGTGGAGGCAGAGTGTTGGGAAGCAAGAAAAGGATGATTG…
>Peanut_newGene_3904	Peanut_newGene_3904.1
TATTACATACATATATAGCACTTCATCTTCTTCTTCATAATGGTGTGAGTTTTTTTTTTTATAATATAGTGTGGAAGAATCTGTAAAGCTCAGGAGGGATAGCGCCACGGAAGCATCGACGATGATCCGTTGTTTGTGAAGAGTTTTTACGCTCTTTGATCTTCTGTAGCGCTATCCATCCTGAGTTTCATGGGTTCTTCACACTGCTTCCAATGAATCTTTGGATTTTTTTTTTTTTTGGGATATGTGGATGAATATGATCTATGCTTTCATCATAAGAAGAAGAAAAACGTAACACCAATATTGGATTATTGGTCCCTCATAATAATCATGCACTATACAAGAGCAAGTGGCTTGGTTAGAATGAATATGGAGAAAAATGGAGGAGAGAAAAAAAAA…
>Peanut_newGene_3908	Peanut_newGene_3908.1
GAAGCATTAGCACTTAATTATTAGTTTGCATCATTCTTCTCCTTATTTCCAACCATAGCGATGGAACATGGAATCTCTGAGAGCTATCCATTGTATTAGTTTGAATCTTTTTTTATAGTGTGTAAAGCTCATACTTGGAGGAGAAGCACTAGGATGTCCTTATAATAATCAAAACGCAATGTCCGACATAATGACCGATACAGATGGATGGAAGCCTTTTTTTCTATCTTCGGAACAATAGGTGAAGAAGATTGCCGTATGGATTCGCATACCAAACTTGCCCATTGAACTTTACAATAATTGTTTTCTATGGAGGTAGCATTCGGCCGGATTTGATGGAGTTTCTGCAGCACAAGAATCAAAGGAGATGGCAGCGAGGAGCGACGCGCACGCGTGCCT…
>Peanut_newGene_3911	Peanut_newGene_3911.1
AATTATTTCTGAGATTGATTTCAAAAACCCTGTTCATCTTCTCAAATTTTTCTCTCCTCTTCGTATCTCTTTTCCCCCCTGGAGCTCGGTCTCTCTCATCTCTCTCACCGTGGTGTCGCCGTTGCTCTCTGTCTCGTCATCGTCTTGTCCATAGTCGCGCGCCTTCGTTGCGCTCTTCGTCGCCGGCGGCAGAAGCAGCAGGTCCTGGGGCTCATCGTCTTCTTGCTTCGAATGTCGCCGTCAGCCTCCTTTGCGCAATCAGGAGCTGCTTCATGATTTGCCACACACTGTTAAAACCAGTGTTCCTCCTTCGTAGTTTCCATCATTCATTGCAAGCTTTTCTCCATTTCCTCGCACACCATTCTCCATTCCTTCTTCGACCTCGTCACCACAAAAAAT…
>Peanut_newGene_3913	Peanut_newGene_3913.1
GGGTGAGAACTGAGAAGTGAGAACTTGTTGGTATTCCACTATTCTTCATCTGGTTTCAATGGCAAAGAAGTCTCACATCGGCTGAAGATTTAAGAAACACGTGTGTTATATACGAGAGGTGCAACCAAAGGCTTGTCCCTTCGGGGACATCTGATAAAATTGGAACGATACAGAGAAGACTAGCATGGCCCCTGCGCAAGGATGACACGCACAAATCGAGAAATGGTCCAAATTTTTTTCGCTATTCTTCCGCGGATTTCTGATTTCTTCACCTCCTCTTTGCAATTTTCATCCTTCTTCAATGGATATTTGTCCTCTTTTTGGGGCTATCGGCGATACGGATCTTAAAAATTTGCGGACATACGGATCTTAAAAATTTGTTGTATTTGTCATCGGCGA…
>Peanut_newGene_3917	Peanut_newGene_3917.1
GTTGAAGTCATGGAAAGTGTTGTCACAGAGTACATGTGTCAGTTTACTCGTGAACAATATGAGGGTTTCATGGCCACGAAGAATGCGAATTCAAATCTTGAAGCCTATGCTATTCGTAACAATCCAATGATAATCCCTAGTTCGAACCAATCTTCACCTCTCTTCCAAGATGTAGGACACGATTCGGGGGCAAATTTAGGAAGACCGCCTGATGTTTTGATGAAGGAGTCTATAATTGGCAGATCGACGAACAGGGGATCCTGCAACATTGAATGCTGATGCAAATGCCGTTGTCCTGGCATAGCTATCGCCCGTGGTGGTTCTCCCATTGTTTCCTTGACAATGATGAATATTATAAGCTAGAATTGCAGGGGTGCAGGAGTGGTCCAAGGGGAGAAG…
>Peanut_newGene_3919	Peanut_newGene_3919.1
CTCATGTGTGTCTCTCATAAACTTCACCACACCACACTTTGTGAACCCTTTTCTTTCTCTATCTCTTAATTATATCTTCTATTTATTATTATTATTATTATTATTTTTTAATTTTGTTGTTGTTCTTCATTCTACAACCTCAAAGCTAATAAGGTTCTCTTAGCTAGTGGCAATGAATTAAAAGGGTGCATGCTGAGCAAGATGGAGAAGCAGGGCACGTGCAATACTAACTCATGAAGAGATCATGAATAATATGAGTGTGAAGCAAAGAAGACAATATCTTACATTTTTTTTTTCTATTTCACCAACCTAAAAATATTTTGTAATATTCATTCTTTTCTATTTCACAATATCTACTACTTTATAACTTTGGCATATATAATATATATTCATAATAAT…
>Peanut_newGene_3925	Peanut_newGene_3925.1
ATTTTTGTCTTCGAAAATGGCTCTATTGCGTGTCTTTCAGATGCACTAACTCAAGACTGTCCATTCCACCATCAAATGCCTACTTTGATTCTGATGTTTACAGACTGTCATAGCTTGCTTTCATCTATGCCAAAAGGAGTCTGAATCATTGCTTGACTGGGAACCAGGTACAGAGCTTCTTCTCCAAATTTCTGAAGCTTTCTCACAATCAAACAGGCAATGATTCACTGTCTCTGGTGTTCTATTACAGAATCGATATATTGGTGAAATAGAGTAGATTTGACGATGGAGATTATTAAGGACTGGGATCTTTTTGTGGAGGCTTCTCCAAAAAAAGATTTTGACTTTTGGGAGAAGAGGAAGCTTCCAGAGTTGACTCCAGGTCTCTTTGTGTTGCAT…
>Peanut_newGene_3932	Peanut_newGene_3932.1
GGTTTTTCTCTGCAGCTAGCTGGCGACCCCTGCATAGTTGCTAGCGCCACCGGGTTGTGGATGACGAGGAGTTCTCCCATCTGAGCCTGGCCTCGCCAATAGCACCCTCCATCGCATCAGCACCATCAACCCAGTTTCTCCAAACAACAATGCCCCGGAACAACACCACCTTCTTCTCGACAGCAGTTCGGAGCAACGAGAGCCCTCCATCGCCATGCATCGAAGATCCATCCCACCTTCTCCTTTGCCCGGTGAGATTTTAGTTCATGAGTGCCAATTGCTACCTGCTATTGATGCCTTGGTCTGATTGCATGTATGAGATAGTTGAATCCGTTTTGACTTTTTAAGCTTTAGTATTGGTCCTTGATATGCCCATATATGGGGTATGTGATGGGCAAA…
>Peanut_newGene_3935	Peanut_newGene_3935.1
GCAAAATGCCCTAGCCTCCACCAAAGAAAGCAAACCCTAGCCTCCACCAATATTGTCGCCGTCTGTCGGAGTGAGAGACTGCTGCTGCCGCATCCGTCGCACTCAAGAACTTTCGTCTTCGTGCTATCGGCGTTCGTTACTTCGCCCCCACCATCCTCTGTTCGCTCTCATCAGTCATCTGTTCGCTCTCCATTCCCTGTTCGCTCTCATCAGTCGCCTTTTCGCCGTCGTCCGTTGCGCTCAACCCCTCTCCGTCGTCGTCAATGCTCACTGCTAGTGCCTGTTCATCGTGTTTTTTTATTGTCTGTTCAGAAACCAAACCCTCTTCATGCTTGTTCCCCGATGGTTAGCGATCGTCGTTTTTTAATACTCACTGTTGGTGTTTTGTTTTTCATTGAT…
>Peanut_newGene_3936	Peanut_newGene_3936.1
CCCCGTACTTCAAATGTGTACCTCCCACCAATTATTCAAACTCGACACACTCAAAAACGAAGAAAAAGAGAAAAAAGATTCAGAAGAGAAGAAACGAAGACCATCACCACCATCATGAAGCTTGTTTGGTCTCCAGAAACTGCTTCTAAAGCTTACATAGACACTGTTAAATCGTGTGAGAAATTGAAGGAATCTGGGGTAGCTGAGCTCCTATCAGCCATGGCGGCCGGTTGGAACGCGAAATTCATCGTGGAATCGTGGTGCCACGGCGGCCCCATAGCGACAAGCGTAGGCCTAGCAGTTGCGGCTCGCAACACCGGTGCAAGGCACGTGTGCATAGTCCCGGACGAAATCTCAAGGCTAAAGTACACACAATCAATGGCGGAGATGGGGGTGGCG…
>Peanut_newGene_3958	Peanut_newGene_3958.1
CAAACTTATCACCAGGAACTTGGATCGGAGCCAAAGAGAGGTGGTAGATTAAGATCTAAAAAGGCTGGAAGAGGATCCCGCCGTGGTAGTTAGGACCTTTTTGCATCACTCGCTGGAAATTTTTCTGCTGACAAAATGCATGCTCGTTGCATTTGAAGGGGTGATTAAAGCGAGCCATGCTTTACTATCTCCACGTGACAACAAGCCCAAAAGGACGAGGCTAATGCTTCCCTTCATTGATCGAGGCCCGGGCTAAAACTCACCTTAAATCACCCTTATTCAACCCCTATGAATGAAACAAGTCCATGTCCGTGTGATGTTTTAAATCCTTGGTTTTCGGATTCACATTGTCACATAAGTTATATGCAAGCTGTCAAGATTCTTTTATTTACACAAAAA…
>Peanut_newGene_3965	Peanut_newGene_3965.1
CTTGGGTTAGGGTCTTGCTTTTGAAGGCTATGGAGAAATCTTGGCCTAACACGGGCTTCGAAATGTGTAATGGATTAAAGCGAGGCTTCATTCAATGCATAGCAATAATTCATGGAAAATGACTCCACGTGAACAGATCTGAAACTGAAAGCTTTTGCCTCCATCAGCAGTGCTGCAATGAAGAATATGACAATGCATGGCAGGAATAACAATTCCTCATAATAAGATAATTTCGTGTAGTCAGAGAATTTGTCTCGACTCATTTCTTATCGACGAGTTATTTCATATTTACCATTTTCGCCTTGTGCATCCATTAAATGCTAAACAAGTGTTGATAGTTTGGATGATTGGTTTCTTTTTAATTTGTTTTAGATGTTACTTTCTTGTTAGTATGATATG…
>Peanut_newGene_3970	Peanut_newGene_3970.1
GAAGAATGTTAGGAAGCAGCAGCCAAGGCTCAGGTAGCTCTAATAGAGCTCGTTCGCATGATGGCTCGGTGAAAAACGCACACTTTATCTTATTTTACAAAAATGATACATTTTGTATCCCTAATCCTAACAGTATAACCGCCGTTCCCTCTTTTTCTTCCTCTGCCTCTACCCTCCTCCCTTCTTCACTGCAACAACCCCGTTCCATCACCACCATCCCCTCCATCCCCTTCGACCATCACCAACTCCAACACCACCACGGCTCCATTTCCTTCATCACCCCTCCAACCATCTCTTCTACCGCCTACTCACTCTCTCGCTCACTTTTTTGTCTTCCTCGTCCGAGATGGGTAAGAGAAAAATACTCCAACCCAAACCCACAAACGACGTCGTTTCTAA…
>Peanut_newGene_3971	Peanut_newGene_3971.1
CATTTCTTTCACAGAGGAACCTTGTTTCTCTACCTCAACCTCTAGTATATGAGGCAAGTCAATTTTTTGGTTGCCCACGGATCAGAACTCCATTTAAGAGTCTGTTGCTGGCGATTGAATTGCTACATGCACAAGATGAAGAAGTTCTTCACCAAATTAAATTCGTGCTACTGTCCACATTCAACTACTAACAAGAAGAAGCTATCGAAGTCTCTGCCGTCCAGTGGTCGCATCACAAAGGATCGTCGTGACAGCAGCGTCGATCACAACGAGGTTGTTGTTACCAAACCACAAAAGAAACCCATTGTGGTCTTACCCTCCGACGATTACAAGAACAACAGGGAGTGGTGGAAATCAATGCCGATCGTGGCTTTAGGGTTCGCTTTTTCCATGTCTTGA…
>Peanut_newGene_3977	Peanut_newGene_3977.1
AAAAAAATGAATTAAAATGACAATAGTTTTATGGTGGTTACACAAAACTTCCTTTTTTTGGCCAATTTTGGCATTTTTAGCCTCTGCCATAATTTTTCATATTTTTGTGGCGTTTTAGTTTATTATGGAGGTTTATAACGCCACTATGATTTTTAGTTTCTCTTTTAATTGGATGATTAGTGTTGCTGCATATGAGAAATTGGGGGTAATGTAAATTGACTCGCGTTTCTGCGTTCCTCTTTCTCGCCGTCGTGGTGTTCTTCACTGCTATGCTCGCATCACGTTCTGCTCTGCTCATGTCATGTGCTTCTTCTCGCATCGTGTTCTGCTCTGCTCTGCCATGTTCGATCTTCGGCCCGCGCCATTCTGAAACATTCGCTTTGTTCCGCCGTGGTGTCA…
>Peanut_newGene_3978	Peanut_newGene_3978.1
AGAAGACTTATCCGGTGGATCTGTACCGACCGTTACGCGACTTGGTAGCGAGAAAATACTCAGAGACCGATGCACAGAAAGTTGAAAGCGTTCTCGAAACCCTAAACAAATGCCGCAGTGACATGGTGGAGCGAGGGGACCTCTCCCTTCCCATGCAACGTGGCTGCCTCATTCACTACTTCAAATGTCTTTGCATGGTTGAGCCACTCTTCACCGCTATCTCCTCCGACGCCGACTCCGACGCCATCATGTTTTTCTGGTACGACGCCGTCGACCCTGACTATATACGTGTGGATGGAGTCTCCTCCCAGCGCAACAGTATCCAATTGGAGAAGGCTGCTGTTCTCTTCAACCTTGGCGCCGTATGCAGCCAGATTGGAGCCTCTTGCGACCGCACCG…
>Peanut_newGene_3982	Peanut_newGene_3982.1
CGATAATGATATTTTGTCTCTTTCTCTATCTCATTCCCTGGTTTCGATTTTCTCTGAATTCAAATCTCAACTAATGTACTAGCACAGTACCACCACATCCTCCTCCTCCTCATTTTAAGCAACAAGCTACAACAACACCACTCACCGAAGGAGAAAGAACAGATCGTTTTTTTGTTCTCCAGAGTTTTTGAAGGCGAAGTGCTTGATGAATTGTGAAGTCCCATTGATTCTGGAGCACGAGAATGAGCAGCAGCTTCAACAGACTTCTTGCTATGGCGATTGCGGAATTAGCTGATGGCGAGGCCGAGGCCGAGGGCGACCCCATGAAAGCCGCTTATGGCGAGGACGAGGCGACGGGGGACTTCGAGGTGGATAGTGACATCAAGGTGGTGATGATGG…
>Peanut_newGene_3988	Peanut_newGene_3988.2
CTTATGTGATCTTGTTACTCTTTTCTTTGTGGTATAATTCTGTGAGATACTGTTTATTAGTTATTTCTTAACTCGTGTTGGGATGAATTGAATGTTTCTTGTAATACAATGGTAAAATTCTCTCCGTCAAGGTTGACAAGCTTGGACTGTGCCAAGACCAGCATGTCGTCAAAGTTGATAGCTGGTGACACCGACTTCTTTGCCAACTTGGTATGTTTGAAGTTAAATACCCAATCAAGGGAATCAATATATTGAAGCCTCATGGAAAAAGTGCTAGAGACAGCTTTCTGATATATATATTTGAGTTCTGCTAACTGAAAGGAAAGAGCTTCTCAAGACCCAGTTGGTGGGAAAGTCCGGTGTTACCCCCAATGTTGCAACCTCTTTCATTGAGACACT…
>Peanut_newGene_3990	Peanut_newGene_3990.3
ATTCTTTCCTATATTATTCCCTCACCTTTATATAATCCCTTCGTGCACATTGTGCATTTTAATCGCGATGCAAAGACGTCGACTCCGACAACGACGACGATCTCCCCTCAAACGGTGCGTGTACTCAAGGGCTTAGGCGAGAGCCATTCAAGAGCTATGGCATTGGTGGTCGCAGTTGTTGCGCGTGGTGGTGGATACGGAGGAGGAGGAGGCAGTGGCGATGGTGCTTGCTGCAGCTGCGGTGGGATGGGTCATATGGCCACAGATTACAACCACGGAAGAGGCGGATGCGGTGGTAGGTACGACGGCGGAGGCAATGGTGGAAGCTGCAACAGCTGTGGGTATTCTGGGCTTTTGAAAGGGATTGCCCAACAAGCTCTCGCTGAAAAATGAAGTTAG…
>Peanut_newGene_3992	Peanut_newGene_3992.1
GGATAAATAAGAAAGAGCAAGAAAGAAATCATAAAAATGTACTCTTTTTAAGTTTTTATAATGAAAAAAAGAGAAGGCAATCCAAAGGAGCTTACATCATTTGCTTAATGCTTATATTAATCAACAGTCATTTCACCTAAATTCACTATTTAACAATTGCCCTTTTGAAAAATTTGGGAACTGCCAGTGATAGGCTAGAATGCTAATGGTATGCTCAAGAAGAAACAGCCCAGCAAAGTTGAAATGCCGAATACAATGAAAATACAAGTGGATAGCACCATGGCAGCAACTACTAATGGAAAGATTTTCTTCTTTTGCTGGAGTGTAGTAGTGTGCATGAATAAATTGCCTATATTTCTGCAGTAAGTGTGGAAGGTTGTTTTATGAATAAACCTGTAT…
>Peanut_newGene_3997	Peanut_newGene_3997.2
CTCGTTCCAAAAATTATTAGGTGGAACCCATGGAAATAGACATGCTTGAGACTATGAGAATTATGCAGAATCAACAATGGAAAGCTTTTGATGTCTCTAAAATGCTGAAGAGCAGGCCCGAGAACCAAGTTCCCATGTGTGAGGCTCCCAGCACTTCTACTGAGCAAGGGAATACGTCTGGTAAAGCAATGCTCAAGGACAAAGTGGTTCCGACAGAAAAACCTCCTGATGAAAGTACGAAGAATTTGAGAGGCACCCAGAAGGAAAAAGAGCGGATGTCTCCAGAAAGAAGTGTTCGCAGAGACTCCTGCGCAAAACTTTGTGGAATAATTTGAGAACTCTGGAATTCGATATCAGTTTATCTTGGTGCCTATTGGGAGACTTTAATTCTCTGATGCA…
>Peanut_newGene_4019	Peanut_newGene_4019.1
ATTCTTTGTATCTTTTCAGTTTTCATCCCTTCTTGTCTGAACCATTTTCAATTTAAATATTTGTTGAAATTTAAAGAGTTAAACTCCAAAGTGTCTTTGATTTATCAATTGCGCTCTTTATGTTCTCGATATTAGAAAAATTGTACTTAGTTTGTTACTTATCTTATTTTTGGCCAATTTCGTTGCCGTCGACAGTGACATGCCACGTTGAAGTGAATAACGGTTAAATGAGCTGGTAATTGAAACTCTTTTGACCCAATTTGGTCGCTTGTCCCTTTTTCTAACTTTGTTCCTGGTCCCTTGTCCCTCTTTTTAATCTTGTTCCTGATCCCTCCTCCTCCTCCTCAACAGGTACCAGAGCGAGTCTCGCCGCCGCTGTTGTGCTGTGGCTGCTGTCGC…
>Peanut_newGene_4023	Peanut_newGene_4023.4
CCACGCTGCAACTTGAAGAGAGGAAAGGGAGAGCTTTCCAAACCCTAGCCCCTTTAATCAAACTACCATAACTTTTCGTTCCGAGTTTCGATCGCTGCACCATTTGCGGCTATGCGTTCACCGCGTCGAACTCTACAATTCTATCGGATCAATTTTGCTAGTAATCTTCTCCCTCAATCCAGTTTCTCTACCCCTTAATTATCAAAAATTGTGGGTGCTCAAGTTGAAGAATTTGTTGATTTTGGTTCTCTAGGTTTGAATTAGCTTGCGGAATTCGACTCTCTTGATCTGTGGGTATGGTGAGGTCTCTAAACCTAGCTAATTTTTTGTTTTCAATATGTAGAACTCTGAATTTTAAGTATGTAAGTATGATATATGAAAATAGGTGTATAAATAAAC…
>Peanut_newGene_4027	Peanut_newGene_4027.1
ATAATATTATCTTCTTATTGTGCTCTTCCCTCAGAAAGTTAACAATTCTGAGTAAAATAGAGACCAATTTACTTGTGCAGATGATGTCCATGGGATACAGCATGCTACCGATGATGTTCTCCGGAATCCAGCAGTATATACACTCAATAGGAATGGGGATTGGAATGGGTATGGGCGTGGAAATGGGAATGAACAGACCAGTAATGCCATTTCCCAACATGTTAGCTGGTTCTGCTTTGCCACCAGCAACTCCTTCAGGTGCTCCTCATTTGGGACCAAGATTCCCTTTGCCCCCTTTGCATATGCCCCATGTTGATGCATCAAGAATGCAAGTGCAAAACCTGCCAGATAATCATAATGTGCCTACCTCAATTAGTACATCGGATCCAGCAGCTCAAT…
>Peanut_newGene_4034	Peanut_newGene_4034.2
ATTTGAATAACAGAATCATCAAAATAGAAATAAAAATTCAGAAAATGGATTTGTTAATCTGCTGTGGCTGTGTTTTAATTTCTATTGGTGGTTTTCAAATATTTCGGAAAATGGATTTCACGATTTGTTAATTGCTGTTGCCGTGTTGAAATCATCAGGCGAGTCTTCTCCCTTTCAAACCCTAACAGAAGCTAAACCCCAATCATCGCAGCTGAGCACGTGCTAATAGTTCGAACCGCTATCCAACCCTAAACCTCCATCCGTTCCCTTCCATCAAAGTTGTATGCTCTTTGTCATGCTTTCTTTTCCGCAAAGATACTTTGGTTCTGCAGCGGTCGAATGCACAAATTTAGGAGAATTAGTTCAAAGATGACTTGTCGAGGCATGGGGACTACTTTG…
>Peanut_newGene_4039	Peanut_newGene_4039.2
CCCAAACCTAATACCTAATTGCTTCAGGAAATAAAGAACAGAAGAAAGAAAGAAAGAAAGAAGGAAAGAAAGAAAGGGATGGCGGAGAGGATCGGAGCGTGGGTCACACGAGAAGAGGAGAAGGAGTGCGTCACGGTGCTCATGCCGCCGCGCTCCTTGCCGCCGCCGTCGTGTCACCGTAGGAGGGAGGCAGAGAGAGAGTGACGACGAAGGGAGAGGAGGACGCGAGCAAGGGCAGAAGAGAGGAGATCGCGTTTGCTCACCGCCAAGCCGCTGCCATCCAAGGTTCGCGCTAACACCGTCATCGCCGTCCGAGGAGCGCCGCTGACCTGTCACTGCCATGGCTGAGTTGTTGTGAGCGTTGGGCCCAGACGAGAAAGAAGAAACGCGGGCCTGAAA…
>Peanut_newGene_4040	Peanut_newGene_4040.3
AAAGAACAGAAGAAAGAAAGAAAGAAAGAAGGAAAGAAAGAAAGGGATGGCGGAGAGGATCAGAGTGTGGGTCACACGAGAAGAGGAGAAGGAGTGCGTCACGGTGCTCATGCCGCCGCGCTCCTTGCCGCCGCCGTCGTGTCACCGTAGGAGGGAGGCAGAGAGAGAGTGATGACGAAGGGAGAGGAGGACGCGAGCAAGGGCAGAAGAGAGGAGATCGCGTTTGCTCACCGCCAAGCCGCTGCCATCCAAGGTCTGCGCCAACACCGTCATCGTCGTCCGAGGAGCGCCGCTGACCTGTCACCGCCATGGCTGGGTTGTTGTGAGCGTTGGGCCCAGACGAGAAAGAAGAAACGCGGGCCTGAAATCCTGACGAGTTGGGGAGGATTAGCACCACCG…
>Peanut_newGene_4042	Peanut_newGene_4042.1
AAATCATCGTCATTTCATGATGGAATAGTGGGTTTAGAATTTGGACTTTGGAGGAACCTAATTCCCAAAATAGAGTGACACACACAACACAATACAACACAAGAAGAGATGGCATCCATTGCGACCCATTTCTCAGCCTTTCTGTTACTCTTCCCAGTGGGCCTCCGCCGCTTGCATTCCTCCTCCTCCCTCTACCTCCACAGCCCTTCCCAATTCAGATCCAAGCTATGGTACCTCTCAGATCCCAAATGGAAGAATCTCGATCTCTACGCTCTCCTCATTACACTCCCAATCGCCTCATTCTCGGAGCTTTTCCTCTTCCTCTCCTTCTCCGGCCACCCTTCTTACAGGTTCTCATTCTTCCAACAGTCTTTTGCGCTTCTCGCTTTCTGGTTTTTG…
>Peanut_newGene_4044	Peanut_newGene_4044.2
TTAAAACTTAAACCTAACCTAATTTCACAAAACCTAAACGCCTATACGTTCAGAAAGGGAAAAAGAGAGAAAGGGGAACAGAGAGGGAGCAAAGGGGAAACGAGAAATTGATGAAAGGGAGAAGAGGGATCAGGGAAGCCAAAGGAGAGGGTGACGACGGACGGTGTCATTACCGTCGCTGCCATTGAAATCGGAGGGGAAGCACCACGAAAAACAGAGAGACGCGCATGATAGAAGGAGAAGGTAGTGTCGCTATCGTGCCTGGTGATCGTGCGGAAGCTTCGATCGCTATTGTCCCTGCTAGGGTTACCGCTGACGCCGAACATAACAGGGGAGAGGAGCGCAAATTGGAAGAGGAAAGGGAGCTCTGTTGCGGGCTCGTCGCCAAGAAAAGAAGAG…
>Peanut_newGene_4048	Peanut_newGene_4048.3
GAAGTTTTAAGTTTTTGGTCCGGATCAATATTTTTTTTTACGTGTTTCACTCCACTGTTTTGAAAGTAGTTGTGGAGTGGTAGTAGCATAAGTTTCCGTATAATTATCTTGATTTAAGTTTATTTTTGCTTATGATGATGTTTCTGCTGAAAATAGTTTGCATAACAAATTTTGGGTCTTGATTAAATTTTATGATTCACTATCCGGTAATGCTAAATCAAAATTTCCTCTTGGTCTTTCGCTAAATCTGATTCTAAATGCTTTTGGCTAACAATATGCTCTTGCTACCCCATCAAAATTTAATCTTGCTAATTGAGATTAAACGTTGCAACAAAAATGTTCTCTTAAAGATTTCACTCTCGTTTGCTTCACTCTGCCGCTATTTTTTTCTTTTATTGG…
>Peanut_newGene_4050	Peanut_newGene_4050.17
CCTTAGTTGAAAATTGAAAGTCGAAACACCACACGCGTCACGCTGTTGCTCCTGGCCTGTGCAACGATCTCCGATCTTCTTGCGTTCTCCGACGATCTTCTCCGGTGACATCTCATCCAGCGTCGATCTCCTACAGTGGCGATCTCCTCCGGTGACGTCTCCTCCAGCTTCTTCTCCTTATCAACCTCTGTGTCTTCTCCACCAAAATTGTCAACATCTTCCTTTCCTTCCTCTGCGACGATCTAGGCTGTTTGCGAGGATTCATCGCGAGTGGAGAAGTCAATTCCGCCATTTACACAGCAAGATCAACAGCAATTTGTGTTCCGCTGCTCTGCCGCCGCTGACGTTCCTCTATTTCTCTGCTTGGTGCCTTTGCTGCTGTCCTTCACTCTTCCAAAG…
>Peanut_newGene_4056	Peanut_newGene_4056.2
CACCAACACCCAAATCACACCATTTTCAACCGTCATTCTCCGCTGCTGTGGTTGCTCCGTCACGGTTGCGCCGCCGTCGCTCCTCTTGCTCGCGCTGCCGTCGCGCTCTGTTGCTGTCGTGCCGCTGTCGCTCCCCACATTCGCGCTATTGTCACTCCTTTTGCTCGCGCCACCGTCACTTCGCTGCTGCCGTCGCTCCTTCTCTCTGCTGCCACCGTCGCTCTTCCTACTTTGGTCCTTCTCTGCTCTCTCTCAATTGAGCTCACAAGAACCAGGTATCTAAATCTAGAGATCCAAACTATGACCTAAATATCCAATTTTATCCAATCTAGAAATCCAAACTATGAATTCTGCTAAACAAAATAATTATTCAATTGAGGGTGAATAATTGAATATATT…
>Peanut_newGene_4057	Peanut_newGene_4057.1
ACTTATTGACTTTACCTTTCACAGTTGAGTTCCACTAACAGTGTGAAATTTTAAAATTTGAATTCAAAATTAAAATTGAAAACAGAAAGGGATTTACGTTATTTTTCTTCTGTCATTTGGTGATGCCGTGCCAAGAGCATGGTAGTCACCAATGTCGTGGTGGTGGATACAGAGGAAGAACCGGTGAAAAAGAGTAGATCGATGGAAAGAACTGAGCGGTTGCCACAGAAAGCACATGCAGCGAGACTAGGCAAGCGGGGAGCACAGCAGCGGCGGCGACAAGAATAGATCGGTGAGATCTATTTATTTCCTGTCACCGTGAAAGGGACAACAGCAGTGGTGGTAGGGTTACGGCAGTTGAAGAGGTTGCGGCGGTAACTATGGTGGACGAGGAGTCTA…
>Peanut_newGene_4059	Peanut_newGene_4059.1
TCTAATCTGTCAACTCCTTGGTGAGCCACACTCACCCTCCCTCATGACTCACTCACCACCGCCATTTTTCTTTCCCTTTACCCCACACCCACACACATGAACAGAGACAGATTAAGAGAAAGAAAGGGAGAAAGGGAAAAGGAAAAACAGAAGCAAAGAGAGATCCGAGAGTGAGAGCTGGCGATGGGAGGCAGAGGAGAGGCGAGGGGCTGTCCCGCGCCGGCGTTGCGCCTCACCGTCCGTGAAGCCACGCGTCTTCGTCTCCCCACCACCGAATCATCGCGCCACCGTCACCGTCGGGCTGCTGTGCCACCATTGACAATGGTTCAGGGAGAAAGGAAGCGCTGCGATGAGGAACAGAACAGGAGCCCGTCGTGTTCGCTGCAATCCCGTCATCCG…
>Peanut_newGene_4061	Peanut_newGene_4061.1
AAACTGACGCACCCTTCTCTGTGAGGCCCCAAAGATCACCCGTCCTTACACAGAGTGCAGCAAGAGGTTATGATCTGGAAGGATCTCTTCGGTCACATGCACTGCCACCCAGAGCGCCATTGGCAAGGGATCATCAGACCACCACCGCAAGAAGGGGAAGGAGGACCACGAGATTGCGACATGTCTGCTGTTACTGGCGAGTGGGAAGGGGAAGGAGAGGGGGACCTCAGCAGGGTGTCACTGGGAGAAAGCCGACCCCGATGACACTGTATCCTTCTCCGTTGACATCTATTTGACTGCTTCTCTTGATCAACAACACCACCATTGCTCTTTGGATTTGAGGATGGCTATCGTGGCTGCCGGAATTGCGAAGGTGTTGGAAGCACTTATTGGATATGC…
>Peanut_newGene_4068	Peanut_newGene_4068.1
CAAACAACATCCATCCCTCCCCTTACGCTGCCCAGATCTCCGCCGCCACATACAGCGCCGCCGGTCCCTCTAAACGTTCTTCTCTGGCCTCCCTACGCCCAAATCCCATACTTGCCCCTGCCGACTTGCTATTCGTCGCCAATCTCATCCGTCTGTTTTGAATTTCACATCGGGTCAGGTTGCCAAGTTCATCCTCTGCCGTTCTGAACACTACCTGATCTTGGGATTGACTCATCTTCTCTTTTGATTTCGTCGCCATTTCCCCCGCCGTTGAGACTCCCATCGTCGTTTTGGTCCTCCTCAGCGGCGCCGGTGATCCTATTTTGTTGGCTGGTGTCCCAATTTCCTTAAATAAACCCTCTAACACCACCCAACCTCACTAACACCATAGCATCTCTG…
>Peanut_newGene_4074	Peanut_newGene_4074.1
ATGCAAGGGAACCATTGAGCATAGATTAATTGTTTGATATTAATGAATAATTTTCATAGGACTAGATGCCCTTGCAATTGCAAAACGTGAAGGTTCTCAAAATGATGGAGTGTTCAGGGTCCCGAAACCAAGGACAATTTCTATTGCAGCATATGCAGAGGGTGAAGATAAGTCTGAGTCTACTGTTATTAAGGATGAAAGCGGGCTTGATGGAACTGCTAGTAAAGACAGACAAGCTAATACGAGATACCAAAAATCAACCAATGAATCATCACAAGCAGAAAATTCTGTTACTGAAGATCATGATGGTGATTCATATGGGACTCGTTCAAAGGAGCATCGGGGTTCAAATAATTATGCAGGGCAGTGGTAAAAAAAATTTTGCTCACAATGGATGAT…
>Peanut_newGene_4077	Peanut_newGene_4077.1
CTAGAACTTTCTCAATGTTCCCTCTCTCTCTCTCCCTCCCTCCCTCCCTCCCTCCCTTTCTCTCTCTTATCTCATTTAGATCTCTAATACCTTTCATGGTATTAGAGTATCAGGTTCTGATCCATGACAGATGCTAATGTTACTATAGCTTCAACAGCAACAACAGTGTGCTCATCCATCAACACAATCACTCTGAAACTAGACGAAAACAATTTCGTTCCATGGAAGTGCCAAATGCTTGCATTCATCAAGTCGAACAGCCTCAAAGATCACTTGAATCAGAAAAAAATTTCATATAAGACTGAGGAGGACAGAATCGCAGACAACGGAACTCAAGAATTTTCAGCGTTGGAGTAGGACGATCAATTCCTTGTTTCATGGTTATTTGCCTCGGTTGAT…
>Peanut_newGene_4078	Peanut_newGene_4078.1
GTCAGCCTGACCAGTCTAACCATGAATCCACAGTAATTATGGTCCAGTTAACCTTTTAAAATCACTGATTAGAAAACTAGTGGTGAGCCGGTTTACTGTCCAATTGGACTGGATTGGGAACCGATCAGTTTGAAGAAAATGGCGTCGTTTTGATTCCTGAATGTCATTACTCGAATCTGTATCACTTCACTACTCACTCCTCCCACTCAAGCCAAGAAGAAACACGGACGCCCCCTTATCCAACTCTAGCCTCTCTTCAAGCCACTGTTGCCGTCTGTCTGTCAAGCTACTGCCGTCATCCGTCCTTCGAGCTATTGCCCCTATGTCTCCAAAGTCCAACCCATACTCTCTTCTTCTGCGAGCTCAGCCCATCCGTCGTCATCGGCTGCTCGTCGTCTG…
>Peanut_newGene_4082	Peanut_newGene_4082.1
CGCCTTACCTGTCCGATTCGCCCTTGCCTAAGCGGGCTGCTTCAATGTCGAGCTCTCGCGCCTGTGCCGAGTGCAACAAAACCTCGTTTTTCCGTGACGATATAACTGGCCAGCTGGCATGTTCTACTTGCGGTGCCATCCAACCGTTCGATCAATTCGACGCCCAAATCGGCGGAATCACCGGCATTCAGGGCACCTTCATCAGACTTGGAACCACCGGTTCAGGTTAGGCTTAGGTTCCAAGAGCAATGAGATTCGATCCATGATTTCTGATATCACTGAGGGTGAGTTTGGGCAAGGCAATTGGTTTTCCGTTTTGATTGGCTCCTGTGCTTATGTTGTTATGCGAAAGGATGATCGACCTTTGCCCATGGCGGAAGTTGCCTCTGCTGTTGGGTG…
>Peanut_newGene_4084	Peanut_newGene_4084.2
TGGAGAAACAAATCAGTCGGACAGCATCCATAAATATAGTACATCCCAAAACCAACTATCACCAACATAGATTATCTTCATCTCATAAAACTCATCTTTTATGTATACATATGTCGTGTGAATTAACCAGATGCAACACCACAATTTAAAATTAATCCACACACACATACATAAGAAATAACCAAAGCAGGTCATAAGCAGGTAGTAGGAGTATCACGTATCTATCTATCTATCTCTTACTAGTTACTAGTATAATAATAACTGTGGCTCATTAAGCCACCCGTGATTCTCACGGTAATTTGCAATAAAAAAATGAAAAAGGAGTAACCTAAACGCCTTTCATTCTCGCCCTCATCTTCTTTCTCCATTCTCTAGTTTTCATTTGACGCCGTCTCTCCT…
>Peanut_newGene_4086	Peanut_newGene_4086.1
AAGAGTATGTAATTATATATATTTATACAACCCAAAATATAACTCGAACTATAGAATAGACATCTGTCTCTCAAGTAAAAAAAAAATCAGAAACTCAAAAAAAAATAAAATCCAACTTCGTTTGCATCGGAAATTCTAAACAATCAGCGAGGTGTATGGAATGAAAACCGAAAGTTCTCAACATGGTAAAGATGTCTGGATAGTTAATATAAAAAGTATCGAAAAAGACAGAGGTATAAAATCCCTCAATACCCTTATTCCCCCTTTTTTTCCAAACCAAACCCTAACCATCTTCTAACACACTCACTCACCTCTCACTGCCGCACACACCCTCACTCCCCTCACCCTCTTCCTCACAGCACACACCCACGAGTTGAGGAAAGAAAGAAAAGAAAGATG…
>Peanut_newGene_4095	Peanut_newGene_4095.1
GCGACAATCACCCATCGTATGATTAACCTTAGCAGAGCACCCTCAGTCCTTCACGACCTCACTATTACTTACCCAACCAAATCGACAACAGCTTTCTCTCGTCGGTGTCTCCTTCTGCATCTCTGTCAGTGCCTCCATCAGCATCCTCGTCAGCGGGTCTTTGTCAGCATCGTCGTCTCTGTCAGTATCATCGTCTCCGTGACCTTCAGCATCGTCTTCTCTGGTAGCTATAGGGTCGTCTTCTCTGGCAGCATCTTTATCTTCCGTTAGCGTGCTTCGTCTAGCATGTGTCAACAATGTCTGTGTCATCATCTACTCGTCAACAATGACCTTTCCTTCGTCTGTAGTGGTTATCTTCTCTAGTCAGGTAAGTGTAACCACTCTCACTGCCATTGACAA…
>Peanut_newGene_4099	Peanut_newGene_4099.1
ATAAGAAAGCTACAAAGCAAACTCCAACACCTAAACACCATAAAACAGGAAGAAGGAGTCATCTTGCAAATCAAAGAGGCGGAAGCAGATTTGGACGAAGCTCTTAAGGAGGAAGAAATTTGGTGGGCTCAAAGATCCCAAACCAATTGGCTTAGGCATGGAGACCAAAACTCTAGATTCTTTCACCAAAAAGCTTCAAAAAGAAAGAGTAGGAATTGGGTGAAAGCCATCAAGAATGACGCCAGAGTAACACATGAGGAAGAAGAGAAAATTGAAGTGGTGATGGTAGAGTATTTTGATAACATTTTCAGGTCAGAGGGTATGGAAGAAGCAAGACAAGCGGCTGATGTAGTGAAGAATAGGGTTGACACAGAGAAAAGAGAATTCCTAAATCAGCCT…
>Peanut_newGene_4101	Peanut_newGene_4101.2
CGAAATCCATCGCTTCAATAATCTCGTCTCATTGCCGTTTCTGCCTTCACGTTTCGCGCCGGCGGAAACCACGGTGGCTGAACTCCCCTCGACCAAGCATCAAATTAGGTGCTCTCTCTCTATAGCTGCCAATATTTTACCTCATTTATGTTGCAGAGTTGCTTGTGAGATATGAGTCTGATATCTCAAAATGCTCGCACTAAAGCTAGGAAGACCCAAAGGGTGGAGGACATCAAAGAACCTCTCAATCATGAAGAGGTTGAGGATGGGAAAGATTCTGATGATGAAGCTCTGAAGGCAAAGAAGAGGAAGCGAGAACAGTCAGAAATGCAACAAGTGAGAGAAATGAAAAAGCTGGAAAGCTTTTTGTTTGGCTCTCTGTATTCCCCTGTTGAATTT…
>Peanut_newGene_4107	Peanut_newGene_4107.2
GACCACTAACGCAGAGCCAACATCGATCATCTCCCCCAGCGTCTCTGTCAGAACCACCACCGTCATCATCTTCTTCTTCTTCTCTTCTTTCTTTTTCTTTTTCTTCCACCTTCGCCGAACAACCACGGCGAAAACCCTTTCTCTCTTTCTCTTCCCCTGTCTCCTGCCTTCTCTGTCTCGCCGCCGGGGGCTACCATCCAATGCCGCCGCAACCATCTTCTTCCCCTCCTTACAACCTCGCACTGTGGCTCTCAGCTGGCCCTTGCCTCCCTCATTCCCAGTCGCAGAATTAGAACAGAGCCACTATAGTTCCAGCGAGTTCAAACGCAGCAGCGACTGGTCACTGCCACTGCATCCCTCTCTCCTTTGTTCTTGTTCTGTTCTTTGACTCAGGTTATC…
>Peanut_newGene_4109	Peanut_newGene_4109.4
GGATGAAACTGATTGCTAAGTGAAGGGTGATATTCTGAAGTTAATTTCTCATGCCTTGGCCTCCATTCGTGGTACTAGAAGCTGATCACTAGCTGAAGCTGGTGCAAAGAGCGGAAGACGATAATCACACACAGCAGTCTTGCCACAATTATGATGTCAGGGTTAGTGTTTCTCTTTCTCTTAAAACTACAGGAATGCATGTTTGTCTGTCTGTCTTTGTTTGCATTGTATTTGTTTCTAGTGAACTCAACTCAAATTTGCTTCCAACATTCCAGCAGGTTGGTCAAAGTGAAATGTGCTGGATTATATGCGACAAAAAGCACCTTCGAAACTCGACGATAAATTTTATCGCACTGTTATTAGACCAATTATATTGTATAGAACAGAGTGTTGGATAGT…
>Peanut_newGene_4110	Peanut_newGene_4110.4
CCAAAATCAGCTACCAAAGTCAGCTACCAGTATAAAATACATGTTAGAATACAAATACACATTAAAAATAAATTAAACTACACATATATTTATACACAAATACATTAGTGGCTGATTTTGGTTTACAAATAGCATTTTTGATATGTTAAGTAGGATATGTATAGAATTTATGGAAGGTATGGTGAAATATATATATAGTGCAGTACTCAGATTTAAAATAATCTGCACTCACCAGCTCGTTGATTAATTGTTAGATCCTAATAAGTACTATGTTATGTGAAAGAAGTGGAAATAATGTGCTGTGAGGTGTTTGAGAGTACAACAAATTATGGTGTTATATTGATTATACACATGTTGATCATTATATACACAGATTTGTCTAAAGTTACAGCTATCCGT…
>Peanut_newGene_4114	Peanut_newGene_4114.3
GGTTGTAAATAAATAATTGGAGCTTGAAATTGTGAATACTGGAGCTTGGAGGAAGCGGATTAGTTGAGGTTTTGAGGGCTGTGTTCTTTTAGGAAAATTGTCTTGGAATAATTCTTGGGAATCGGCTAAGGTATGGTTTAGGTTTCTTGCATTTAATATATAATGTTCTGTGAAAACTTAGGCTAGATGACCATAGGATAAGTTGGAATGCAGGTGTATATTTAATGTTTAGTAATGGGTTGATGAATATGCTTGGTTTGGTTTGGTGATTTGTTTGTAAGATGATATTGGTTGCTAGTTGGATCTTTGAAAGCATATGTGATTGAATTGTTGATTAAATGGCTATATTTTAGTTTGGTTGAATGATGATTGATGAAAAGATATGGAGCTTGTTGAGGA…
>Peanut_newGene_4116	Peanut_newGene_4116.1
CAAAACTCTCTCTTCTCTCTCTTTTCTTTTCTTTCACATCAAGTAAACTCTCTGAAATAAGAAGAAAGGAAAAGGAAATCCTGAAGTTAGGGCAAATTGAACAACAAAAAGGAGGTTTCTATTTTCAAGCAACGAAGAAAAGGTTAAAGAGGCTAGGGCAAAAGGCAAAATCAAATCAGAAAGGCAAATCACAAAAAGCATTTCTACATTTGTGATTCATTAAAGAAGTGTTGAAGAAATCATCTGGGTTACAAGTACCGATTTGGAAGATGAAGAAAGTAAACGTAAAGGTACTCTGATGTGAATCAACGTTCACAAAAAAGACTTGGAGCCAAAGCAAGAATGTAAGGTTCAGATTCAAGAAACAAGATGAAAAAAGTTGAAAGAGAATATTAAAGA…
>Peanut_newGene_4118	Peanut_newGene_4118.1
AAAGAAAGTAAGAGAACACAAAGTGAGTTTAGCAGAATGGCTACTAATATTACTCTAAAGCTTTTTTTGTGCACTCTTTTGGTGGCTTTGCTTTCCACTTCAGACGCAACAAGTGGCACAATGGATAGGATTGAAAATGTGGGTTTTTGTGATTACAAAGGACAATGTAACAGTTCATCATGCAGTCTTTTGTGTACTAAACATTATCACTACCAAATCGGTCAATGTATTGCCACAGTAGGTTGCTGCTGCTATAATAATAATAATAGGTTAACTTAGGAGCTTTTCTCATTATGTTTGTAGCAAGTGGAGAATCAA
>Peanut_newGene_4121	Peanut_newGene_4121.1
AAAAAAATTTCATAGAATGGCTACCAATGCTTTTTTAAAAGCTCTCTTCTACATCCTTTTCCTGACACTGCTCTTGCCTTCAGAAGGAACAATGAACAGAGTGGCGCGAACACATACAGTGTGCTTTCGTGAAAAATTCAAGTATTGTGATAATGATGAATTTCGTTGCGACACTTTCTGTATAGCTAAGGGTTTTGGATTGGGAGGCCATTGTTCAGGAAAAGCTTGTTGCTGTCCTGAACGGATCCCTCCTGCATAGTTACATACACTATATTTATATGT
>Peanut_newGene_4123	Peanut_newGene_4123.1
TTGTCGTGTACTTTGCTTTTTTCTGTTGAAACTTAAAAGGGTTCCTGGAGATTTAATTGTCATTGCAGTACAAGTTTGACATTAAAAATGCTCTTATTATTCTATACTTTTCAAAGTCTCATGTGTGAAATCTGCAATAAACAATATAGCAAATCTTTGGGCATGCTTAACGAAAGATCTTGTAGAGTAATTGAGTTATTTGTTTCAAATTTCTAATGTAGAGGATCTTAAGAGTATATTTGGATTGACAAGAATTAAAATTCACTCAAGAATAGAATTCATTTGACAAATCGGAATTCTCATGTTTACTCCAGTTATATAATGGAATGGAATTCTTGTATGTAGAAATTATTTGCTGGTAAGTGCATGGACAAGGAGCTATGCATATAGTTGAACTTT…
>Peanut_newGene_4127	Peanut_newGene_4127.2
TTTCACTTCTTTATTTCCTCTCTTCTTTTTCGCCCCCTTTAACACACCCAACCATTCCATTCTCATCTTTTCTTTTCTTTTTTTGAGTCTAAATAAGCAAGCCCAGACACAGAGAGATAGTGTAGGACTGGCTCTCCCAACCATGGAAGCTTTTAGTTTGCTCAAGTACTGGCAAGGTGGTGGCGCACCCCTTCCACCTCCCTCTACCGCCTCCGCCTCCGCCGCCGCCACTACCACCATTCTCCGTCAGCACAATAATGCAACTGACAGCACAATAATCACTTGTAAATATTTTTGAAATATTTATTAGCAATGAAATTATAAGCAACTAGTAATAAGTGTATATTTATGAATTAAACATGTTTATATAAATGTGTTGATTTCAAGTTGAACAAAAAT…
>Peanut_newGene_4131	Peanut_newGene_4131.2
AGGATTTGTTATGCTGAACTAACTATTACGAACAGGTCCATAGTCGGGTTCATGACGCTGTTGGAAAATATCGGTCAGTCCGGTCCGGTCCAACCCAAATTGTAAGTACACACACCAACAAAGACCAAATGGTCAGAATTCTCCATGAGTTAACCCTGTGGACCCTTACATTTTGCTATAAATATTACTCTCCCACCACAAACTGCATCGCAAAGAAAATCAGGGTAACCTCCCCAACAATTCATAACTCATGCATGCTCCCGTGATGCCAAGGGCGCATCGAACAACCAAGATGTCAAGAGCTACACCCCCCTCGCGATGCAAAAACAAGCTCCCACTCCTATATCTTCATAACCGACTCCATGCATGGGATTGGGTGAAATTGGCAAAAAATATATC…
>Peanut_newGene_4135	Peanut_newGene_4135.1
TGGATCGACATTATTCCGCACCCCTGCTCACCCCGCCACTAAAATTTGTGATGTTCTTCTCGTCTGTATGGTCATCGACGTCGTGTGGTGTTTTTCGAGGAGGAGGTATTTTTTATCGAAGGTGCCTCACATACATACACAGAGACCCAAAAAAGAAGAAACATGAAAAAAAAGGGAAAAAGTGTTTGCTGAAGAGAATGGCCTCAAAGGAGACCCACGACTTCCAACCATTTGTCAAGCATCAGAGTTGTTCCTTACTTCCCCAAATAAGGTCTATGGCTGTGGCTGTTTGGGTTCATAAGATGCTTAGAAATCTGAAAATGATGGTGTGCCACACAAAAGATCAATGAAAAGACATGCATGAGACCAACTATAAGCTAATAGAATAAATCTAGCCAT…
>Peanut_newGene_4153	Peanut_newGene_4153.1
CTAATGTCATCTTCGTCGCATTGCTCTCTGTTCGAGCTTGTTGTTGCCGCCGGAACCTCCCTTACCATGCCGACCTGTTGCATGGATCTGAAGCCTGAAGCATCCTTCCCCGTTGGTATCCTCAGTTCCTCTCTGCAATGTGACATTCTGAGATCTCCGCAAACACCGTTCTCCTCTCCAGCCCGGTACTGACGCCACTGATGATGGATCCGCCTTGGAGCTTCTGGCCGGCTTGTCTCAGCCGCAACGATCCTCTGCCTCGAAGCCTCCGCATATGACCAGGACCCTCGGCGCTCCCTCCTCGACCTGCTGTCCAAGCTTCGCCGATGCGGTTGCTCCTTTCCATAGTTAGCCGCTGCGACGCAATGGGTTGATGCTGCTCTCCCCCTTCAGCTTCTT…
>Peanut_newGene_4154	Peanut_newGene_4154.1
AAATAGATAGATAGATAGATAGATATACAGTCGTTATTTGCGGATGTAGCATCATCAAGATTCACATGCAAATGTAGAAGGTTGTGTATGTGGGACTTTCTCTTTTGAAGTGAGAATCTTGATGATGCTGCATCGGCAATAAACGCCTTCAATTCAATTCTTCATTCAAAATGCTGTTCCTATTTACTCTCTCTGTTAGTTCAATAGTAAGTTACTGTTTTAACCCCAACAAACAGGGTTCCCAGCTTCACAATTGTCTCCATTATTATTATTATATATATATATAAAAAAGAGAGAGAGATCTAATCTGCAGAAGAATTGAGTTTCAGCAACTGGTGAAGGTGATGACCCCCTTTTTTTCCTCCACTTTTATTCACTTTCTGTTGTTGTCAGGTGGTT…
>Peanut_newGene_4158	Peanut_newGene_4158.1
AATTTCTTTTTATGGTATAGGGGACCATAGTCCATAGGTAAAGTAAAAAACAAACACACGTTTATGTATGGATCAAATGCTTCTTCTCTTTCTCTTCTCTCTACACACAACCCTATTCTGGTCATGATGATGTGATTAACATATAATTAATATGGTTTATCTTATGTTATGTTATGTTCCACAATAGGATACACCCCTTATTACATACCCTTCTTACATATATAGCCTCATCATATGAAATGAAACACTACTACTACTACTACTACTACTTCAACATATATAGTATATATATTATAATATATGCAAAGTAAGAAGGCAAGAGAATCAAGTGTGAGATGATGAAGAGAGAAGAAAAAGAAGAACAAGAACAACAACTAGAAGAAGAAGAAGAAGAAGAAG…
>Peanut_newGene_4162	Peanut_newGene_4162.1
GATAAGAGCCCAAAACCCCAAAATTGCGTTGTTTATATAGAATTGGCGGTGTCATTTGTTAACCTGACTTATCAAAATGGCTTGTGAGAATGAGAATGGTAGGAAGGAGGAAGAGAAGTCACTGCCTCTCGTGAATACTGACGACGACAATAAGATGGCATCGGTGGAGTCTGAGATTTCTGAGAAAGAGAAAGATGAGCTGCGGCAACTTTATGAGGAAGTCCTAAGAAGAAGGGGTGGGCCTTTCCGTCGTCGAAGACCAGAACGTGCGCACGAAAAACGAGGAGTCTTTGAAGGCCATTCCAACAACACTCCAAATAAGATGGCATCGGTGGAGTCTGAGATTTCTGGGAAAGGGAAAGATGAGGTGCGGGGGCCCGAAATTCTCTACCCTCCTCG…
>Peanut_newGene_4169	Peanut_newGene_4169.1
CTCGGTAGTAATATTTGATGCCCCATAAAACGGAGTCACTTGCTTCCTTAAAACACACACACTCACTCTGTTTTCCATAAAACCCTTGCTACTAAGCATTAGCAAAAGGGTATAATGATAATCCTGATTGGAAATTGATGATAACTACTTTAGTTAAAGATGGGCGTTGACCTACACACATCATCAGCATCATCATCATCATCACTGCTACCTTACCGGTTCCTTCCTGAAAAGCAGGGGAAGGGCAATGAACAACCTCTTACTCTCTCATCACGTGATCATCACTACTTCCATTCATCTCTACAAATACCCAAACGAGTCCCAATTCCTCTGCCTAACATGGCACACCCCATTGACTCTTGGATTCTCGATTCGCAGCAGATGTGGGACTTAATGGGT…
>Peanut_newGene_4170	Peanut_newGene_4170.2
CGAGCTATTCAGTTGGGATTTGGTGAAGAAAAGAAGAAAATGATGCAAAAAGAGAAGAAGGTAGGGGTTATCGGAGTTGAAATTGGTAACGGAGTTAGAACGCGTCAAACAGGGGCAGCTCCGGAGGTATCAACGTTTGGGTCTGTTTCCGGTTCAAGAGGAGGTGGTTCTTCAGGGACCGGTGTTTTCTTGCCACGTCCCGCAACTACTCATTCATCACGGACCACACCTGGTATATTCATCTAACTAACTCTCAGATTTTTTAGTACTACTATACCCTTTTTTTAGCATCTATCACATTTTAGTTTTTATTTTTTCACAATAATATCATGGGCTTGTGTCATCTCGTAACTTACACTTAACCCAAATTGACACCAAAGGGAGATTGAATAAATTAGA…
>Peanut_newGene_4178	Peanut_newGene_4178.1
CCCAACCCATGATCCGAAGAAAGTTACAAACTTTCCATGAACTTTTGAGCTGGGAAACGCAATAGAAGCTTCTGGAACTTCCCTTCGACTTCAAGGAGCTTTCCCAACCTCTTGGTCAACTGTGTTCTAAGTTTCTGCCCCTGAATTCCTAAATCAAACCACTAAGAGGTGCAGATATTGGAATTTTGCTGGATTGAGTTGGAAAAAATGCAATAATTCAAAAATAATTGTAAGATAATATTGTTACTGTTTCTGATATGTTTGCTGCTTATTGGGGATATGCTTTTTTCAAGTGTTGGATTAGGATTTTGAGCACTATGAATATTTCAGGTGACACTGGCTTGTGATCATGCTAGTATGCTACGGGTTCTCTTGTTTCCCTTAGTTAGCACTTGGCAG…
>Peanut_newGene_4188	Peanut_newGene_4188.1
[truncated: 1,753 more rows]

## Sheet: new gene FPKM
#ID	FH1-seed1	FH1-seed2	FH1-root	FH1-leaf
Peanut_newGene_7012	0	0	0	0.0310569
Peanut_newGene_7428	0	0	0	0.0480761
Peanut_newGene_7077	0	0	0	0.0490172
Peanut_newGene_3936	0	0	0	0.0550826
Peanut_newGene_4947	0	0	0	0.0652498
Peanut_newGene_1427	0	0	0	0.0666982
[truncated: 1,770 more rows]

## Sheet: Integrated_Function.annotation
#GeneID	COG_class	COG_class_annotation	GO_annotation	KEGG_annotation	Swissprot_annotation	nr_annotation
[truncated: 1,250 more rows]
